# Supplementary material for: Comprehensive analyses of metabolism-related lncRNA for LUAD
Source: Research Square preprint supplement (doi:10.21203/rs.3.rs-1593827/v1), 2022-05-10
Supplement: Supplementary file 1 [file d5c1e34717aa3debe32c97e8.xlsx]

## Sheet: Supplementary Table S1
Supplementary Table S1: The reslut of Pearson's correlation analysis
metabolism genes	lncRNA	cor	pvalue	Regulation
ABCA8	AL355297.2	0.415598	9.3328e-24	postive
ABCA9	AL355297.2	0.724664	3.03823e-88	postive
SCLY	AL355297.2	0.578641	3.86089e-49	postive
ACACB	AL355297.2	0.42255	1.39606e-24	postive
ALG10	AL355297.2	0.417708	5.26805e-24	postive
SLC4A7	AL355297.2	0.568606	3.8045e-47	postive
SLC5A3	AL355297.2	0.472475	4.20445e-31	postive
PMM2	AL355297.2	0.449549	5.65724e-28	postive
ABCA9	ITGB5-AS1	0.665247	1.19554e-69	postive
SCLY	ITGB5-AS1	0.602445	3.72411e-54	postive
ALG10	ITGB5-AS1	0.586668	8.74255e-51	postive
SLC41A2	ITGB5-AS1	0.471617	5.56186e-31	postive
SLC4A7	ITGB5-AS1	0.778567	6.26879e-110	postive
SLC5A3	ITGB5-AS1	0.633523	2.24793e-61	postive
SLCO1B3	ITGB5-AS1	0.437174	2.21485e-26	postive
PMM2	ITGB5-AS1	0.666846	4.29886e-70	postive
SCLY	AC010148.1	0.547039	4.37318e-43	postive
ALG10	AC010148.1	0.515273	1.28818e-37	postive
FLVCR1	AC010148.1	0.453813	1.54311e-28	postive
SLC4A7	AC010148.1	0.473706	2.81175e-31	postive
SLC5A3	AC010148.1	0.431899	1.01071e-25	postive
ABCA9	AC021483.2	0.625061	2.50308e-59	postive
SCLY	AC021483.2	0.515419	1.2193e-37	postive
ALG10	AC021483.2	0.533336	1.17835e-40	postive
SLC4A7	AC021483.2	0.659019	6.04486e-68	postive
SLC5A3	AC021483.2	0.588908	2.98129e-51	postive
SLCO1B3	AC021483.2	0.450593	4.1219e-28	postive
PMM2	AC021483.2	0.550262	1.12903e-43	postive
ABCA9	AC012254.3	0.712598	4.37893e-84	postive
SCLY	AC012254.3	0.667997	2.05044e-70	postive
ALG10	AC012254.3	0.560648	1.29807e-45	postive
SLC41A2	AC012254.3	0.402053	3.33683e-22	postive
SLC4A7	AC012254.3	0.732809	3.53124e-91	postive
SLC5A3	AC012254.3	0.691093	3.49787e-77	postive
SLCO1B3	AC012254.3	0.413368	1.70075e-23	postive
PMM2	AC012254.3	0.647497	6.73829e-65	postive
ABCA9	AC009041.3	0.594519	1.93958e-52	postive
SCLY	AC009041.3	0.456948	5.86943e-29	postive
ALG10	AC009041.3	0.46565	3.8023e-30	postive
SLC4A7	AC009041.3	0.606425	4.90745e-55	postive
SLC5A3	AC009041.3	0.539638	9.27802e-42	postive
PMM2	AC009041.3	0.600904	8.10339e-54	postive
ABCA9	AC008870.2	0.539018	1.19402e-41	postive
SCLY	AC008870.2	0.641388	2.46245e-63	postive
B3GNTL1	AC008870.2	0.463417	7.73202e-30	postive
SLC4A7	AC008870.2	0.585171	1.78603e-50	postive
SLC5A3	AC008870.2	0.415546	9.4645e-24	postive
PMM2	AC008870.2	0.527377	1.24198e-39	postive
SCLY	AL513534.2	0.432784	7.84802e-26	postive
SLC4A7	AL513534.2	0.433457	6.47144e-26	postive
SCLY	AC011481.1	0.466547	2.85512e-30	postive
B3GNTL1	AC011481.1	0.402661	2.85162e-22	postive
ABCA9	AL391684.1	0.577612	6.22846e-49	postive
SCLY	AL391684.1	0.698171	2.18677e-79	postive
ACACB	AL391684.1	0.439087	1.26881e-26	postive
ALG10	AL391684.1	0.404786	1.64268e-22	postive
B3GNTL1	AL391684.1	0.450971	3.67527e-28	postive
FLVCR1	AL391684.1	0.401851	3.51499e-22	postive
SLC4A7	AL391684.1	0.521193	1.36189e-38	postive
SLC5A3	AL391684.1	0.433746	5.95796e-26	postive
PMM2	AL391684.1	0.417116	6.18757e-24	postive
ABCA9	AL008726.1	0.51049	7.66512e-37	postive
SCLY	AL008726.1	0.498726	5.47073e-35	postive
ALG10	AL008726.1	0.426749	4.33632e-25	postive
SLC4A7	AL008726.1	0.567496	6.2596e-47	postive
SLC5A3	AL008726.1	0.433905	5.69093e-26	postive
SLC9A7	AL008726.1	0.419134	3.57068e-24	postive
PMM2	AL008726.1	0.502359	1.49059e-35	postive
SMOX	AP005137.2	0.488292	2.10325e-33	postive
SLC16A3	AC068228.1	0.418065	4.78075e-24	postive
HMBS	C6orf99	0.412142	2.36133e-23	postive
ABCA9	AC144548.1	0.578795	3.59481e-49	postive
SCLY	AC144548.1	0.762519	7.16369e-103	postive
ALG10	AC144548.1	0.511312	5.65347e-37	postive
FLVCR1	AC144548.1	0.458336	3.81266e-29	postive
SLC4A7	AC144548.1	0.626221	1.32287e-59	postive
SLC5A3	AC144548.1	0.502516	1.40867e-35	postive
PMM2	AC144548.1	0.519468	2.63294e-38	postive
ABCA9	AC009754.1	0.77009	3.95598e-106	postive
SCLY	AC009754.1	0.626849	9.35802e-60	postive
ALG10	AC009754.1	0.605828	6.66439e-55	postive
SLC41A2	AC009754.1	0.401897	3.47393e-22	postive
SLC4A7	AC009754.1	0.783441	3.43147e-112	postive
SLC5A3	AC009754.1	0.731596	9.8064e-91	postive
PMM2	AC009754.1	0.675688	1.33862e-72	postive
ABCA9	AL080317.2	0.73023	3.08185e-90	postive
SCLY	AL080317.2	0.666483	5.42506e-70	postive
ALG10	AL080317.2	0.562462	5.85434e-46	postive
SLC4A7	AL080317.2	0.714731	8.35608e-85	postive
SLC5A3	AL080317.2	0.558258	3.67805e-45	postive
PMM2	AL080317.2	0.601815	5.12173e-54	postive
ABCA9	C5orf66	0.499459	4.21351e-35	postive
SCLY	C5orf66	0.578485	4.15273e-49	postive
ALG10	C5orf66	0.457387	5.1218e-29	postive
SLC4A7	C5orf66	0.563492	3.71738e-46	postive
SLC5A3	C5orf66	0.477482	8.09704e-32	postive
PMM2	C5orf66	0.493403	3.57609e-34	postive
ABCA9	Z94721.1	0.495272	1.85721e-34	postive
SCLY	Z94721.1	0.531998	2.00764e-40	postive
SLC4A7	Z94721.1	0.466662	2.75203e-30	postive
SLC5A3	Z94721.1	0.447222	1.14052e-27	postive
PMM2	Z94721.1	0.426635	4.47747e-25	postive
ABCA9	AC093690.1	0.698885	1.30003e-79	postive
SCLY	AC093690.1	0.699865	6.35135e-80	postive
ALG10	AC093690.1	0.60227	4.06906e-54	postive
FLVCR1	AC093690.1	0.415605	9.31673e-24	postive
SLC4A7	AC093690.1	0.777866	1.31203e-109	postive
SLC5A3	AC093690.1	0.714275	1.19249e-84	postive
PMM2	AC093690.1	0.685759	1.45469e-75	postive
ABCA9	LINC02728	0.619216	5.96897e-58	postive
SCLY	LINC02728	0.516064	9.56549e-38	postive
SLC4A7	LINC02728	0.462485	1.03813e-29	postive
SLC5A3	LINC02728	0.438268	1.61127e-26	postive
B3GNTL1	AC145285.2	0.452495	2.31047e-28	postive
ABCA9	AC079907.1	0.553302	3.10433e-44	postive
SCLY	AC079907.1	0.673295	6.5123e-72	postive
ALG10	AC079907.1	0.467517	2.0919e-30	postive
FLVCR1	AC079907.1	0.434112	5.36316e-26	postive
SLC4A7	AC079907.1	0.595325	1.30421e-52	postive
SLC5A3	AC079907.1	0.463814	6.81877e-30	postive
PMM2	AC079907.1	0.474409	2.23247e-31	postive
ABCA9	ZNF32-AS1	0.505537	4.71753e-36	postive
SCLY	ZNF32-AS1	0.568424	4.12941e-47	postive
B3GNTL1	ZNF32-AS1	0.415436	9.74981e-24	postive
SLC4A7	ZNF32-AS1	0.549368	1.64615e-43	postive
SCLY	AC004471.1	0.406228	1.1275e-22	postive
ABCA9	AC010525.1	0.430004	1.73221e-25	postive
SCLY	AC010525.1	0.541634	4.10109e-42	postive
ACADL	AC104984.1	0.441602	6.06518e-27	postive
ADCY4	AC104984.1	0.56642	1.01268e-46	postive
INMT	AC104984.1	0.414968	1.10647e-23	postive
ABCA9	AC005519.1	0.649302	2.29104e-65	postive
SCLY	AC005519.1	0.658002	1.1373e-67	postive
ACACB	AC005519.1	0.407534	8.00447e-23	postive
ALG10	AC005519.1	0.447982	9.07419e-28	postive
SLC4A7	AC005519.1	0.622993	7.74893e-59	postive
SLC5A3	AC005519.1	0.503319	1.05431e-35	postive
PMM2	AC005519.1	0.44829	8.27084e-28	postive
ABCA9	AC084083.1	0.551727	6.06892e-44	postive
SCLY	AC084083.1	0.646314	1.3618e-64	postive
ALG10	AC084083.1	0.59184	7.19595e-52	postive
SLC4A7	AC084083.1	0.743595	3.0955e-95	postive
SLC5A3	AC084083.1	0.581939	8.24851e-50	postive
PMM2	AC084083.1	0.632128	4.93695e-61	postive
SCLY	AC087742.1	0.422975	1.24123e-24	postive
B3GNTL1	AC087742.1	0.479077	4.76394e-32	postive
CYC1	GAS5	0.410191	3.96842e-23	postive
NME2	GAS5	0.443719	3.24398e-27	postive
ABCA8	AC105339.3	0.408787	5.75386e-23	postive
ABCA9	AC105339.3	0.718612	3.94564e-86	postive
SCLY	AC105339.3	0.654544	9.56963e-67	postive
ALG10	AC105339.3	0.527026	1.42473e-39	postive
SLC4A7	AC105339.3	0.748134	5.26836e-97	postive
SLC5A3	AC105339.3	0.671192	2.58349e-71	postive
PMM2	AC105339.3	0.626524	1.11998e-59	postive
ABCA9	AC136424.1	0.617157	1.7958e-57	postive
SCLY	AC136424.1	0.589751	1.98404e-51	postive
ALG10	AC136424.1	0.59163	7.97369e-52	postive
SLC4A7	AC136424.1	0.816562	2.73087e-129	postive
SLC5A3	AC136424.1	0.623587	5.60454e-59	postive
PMM2	AC136424.1	0.666973	3.96345e-70	postive
ABCA8	AC092376.2	0.45444	1.27286e-28	postive
ABCA9	AC092376.2	0.69803	2.42353e-79	postive
ALG10	AC092376.2	0.430881	1.35042e-25	postive
SLC4A7	AC092376.2	0.610655	5.51528e-56	postive
SLC5A3	AC092376.2	0.426737	4.35157e-25	postive
PMM2	AC092376.2	0.464006	6.41479e-30	postive
SCNN1D	AC133919.2	0.459244	2.87281e-29	postive
ABCA9	LINC02390	0.586522	9.37736e-51	postive
SCLY	LINC02390	0.499665	3.91554e-35	postive
ALG10	LINC02390	0.437819	1.83612e-26	postive
SLC4A7	LINC02390	0.555591	1.16427e-44	postive
SLC5A3	LINC02390	0.526136	2.01576e-39	postive
PMM2	LINC02390	0.48709	3.17759e-33	postive
ABCA9	AC010609.1	0.690968	3.81944e-77	postive
SCLY	AC010609.1	0.553704	2.61476e-44	postive
ALG10	AC010609.1	0.552819	3.81491e-44	postive
SLC4A7	AC010609.1	0.79468	1.22482e-117	postive
SLC5A3	AC010609.1	0.71018	2.81203e-83	postive
PMM2	AC010609.1	0.658555	8.06503e-68	postive
B3GNTL1	AC084125.2	0.409734	4.47947e-23	postive
SCNN1D	AC084125.2	0.483881	9.47725e-33	postive
HMBS	AP002748.4	0.476941	9.68811e-32	postive
ABCA9	AC025031.3	0.665942	7.67266e-70	postive
SCLY	AC025031.3	0.656122	3.63313e-67	postive
ALG10	AC025031.3	0.652716	2.91608e-66	postive
FLVCR1	AC025031.3	0.424715	7.65603e-25	postive
SLC4A7	AC025031.3	0.834893	2.52857e-140	postive
SLC5A3	AC025031.3	0.662089	8.84584e-69	postive
PMM2	AC025031.3	0.688441	2.25484e-76	postive
ABCA9	AL139041.1	0.647214	7.97762e-65	postive
SCLY	AL139041.1	0.455916	8.07655e-29	postive
SLC4A7	AL139041.1	0.54677	4.89355e-43	postive
SLC5A3	AL139041.1	0.437571	1.97356e-26	postive
ABCB6	AP003119.2	0.471741	5.34088e-31	postive
G6PD	AP003119.2	0.432544	8.40656e-26	postive
DECR2	AC008915.2	0.424744	7.5946e-25	postive
ABCA9	AC110769.2	0.69731	4.08752e-79	postive
SCLY	AC110769.2	0.692846	1.00873e-77	postive
ALG10	AC110769.2	0.665233	1.20637e-69	postive
SLC4A7	AC110769.2	0.764366	1.1801e-103	postive
SLC5A3	AC110769.2	0.655955	4.02605e-67	postive
PMM2	AC110769.2	0.693738	5.33942e-78	postive
NUDT1	AP000251.1	0.430769	1.39417e-25	postive
RRM2	AP000251.1	0.418386	4.38037e-24	postive
ABCA9	AC123595.1	0.436462	2.72246e-26	postive
ALG10	AC123595.1	0.438044	1.71969e-26	postive
SLC4A7	AC123595.1	0.56274	5.18062e-46	postive
SLC5A3	AC123595.1	0.407887	7.29518e-23	postive
PMM2	AC123595.1	0.414448	1.27272e-23	postive
ABCA9	AL161729.3	0.466619	2.79014e-30	postive
SCLY	AL161729.3	0.558805	2.89976e-45	postive
SLC4A7	AL161729.3	0.484105	8.78573e-33	postive
SLC5A3	AL161729.3	0.460373	2.01797e-29	postive
ABCA9	AL008635.1	0.454029	1.44431e-28	postive
SCLY	AL008635.1	0.580034	2.01617e-49	postive
SLC4A7	AL008635.1	0.50771	2.13313e-36	postive
SLC5A3	AL008635.1	0.433619	6.17892e-26	postive
PMM2	AL008635.1	0.435948	3.15946e-26	postive
ABCA9	CHROMR	0.627346	7.11328e-60	postive
SCLY	CHROMR	0.604998	1.01817e-54	postive
ALG10	CHROMR	0.441863	5.61619e-27	postive
SLC4A7	CHROMR	0.65074	9.64854e-66	postive
SLC5A3	CHROMR	0.452031	2.66129e-28	postive
SCLY	AC004263.1	0.579335	2.79459e-49	postive
B3GNTL1	AC004263.1	0.475973	1.33412e-31	postive
PMM2	AC004263.1	0.418653	4.07239e-24	postive
SCLY	AC011462.4	0.487428	2.82972e-33	postive
B3GNTL1	AC011462.4	0.440709	7.8878e-27	postive
SCNN1D	AC011462.4	0.476948	9.66585e-32	postive
ABCA9	AL450306.1	0.653402	1.92104e-66	postive
SCLY	AL450306.1	0.644939	3.07249e-64	postive
ALG10	AL450306.1	0.488548	1.92617e-33	postive
SLC4A7	AL450306.1	0.57789	5.4749e-49	postive
SLC5A3	AL450306.1	0.567885	5.25898e-47	postive
PMM2	AL450306.1	0.520741	1.61889e-38	postive
SCLY	LINC01238	0.462305	1.09888e-29	postive
ABCA9	AC010999.1	0.64707	8.69344e-65	postive
SCLY	AC010999.1	0.55051	1.01668e-43	postive
ALG10	AC010999.1	0.490725	9.08425e-34	postive
SLC4A7	AC010999.1	0.539887	8.38027e-42	postive
SLC5A3	AC010999.1	0.440802	7.67628e-27	postive
PMM2	AC010999.1	0.454296	1.33064e-28	postive
ABCA9	AP000487.1	0.693725	5.39029e-78	postive
SCLY	AP000487.1	0.73134	1.216e-90	postive
ALG10	AP000487.1	0.619679	4.65373e-58	postive
FLVCR1	AP000487.1	0.423224	1.15861e-24	postive
SLC4A7	AP000487.1	0.768171	2.72254e-105	postive
SLC5A3	AP000487.1	0.667857	2.24508e-70	postive
PMM2	AP000487.1	0.687359	4.79668e-76	postive
ALG10	AP000424.1	0.50253	1.40148e-35	postive
ASNS	AC002066.1	0.602131	4.366e-54	postive
ABCA9	AC078795.1	0.718686	3.71851e-86	postive
SCLY	AC078795.1	0.705641	8.76692e-82	postive
ALG10	AC078795.1	0.638537	1.28453e-62	postive
FLVCR1	AC078795.1	0.403981	2.02556e-22	postive
SLC4A7	AC078795.1	0.796573	1.37192e-118	postive
SLC5A3	AC078795.1	0.654858	7.8955e-67	postive
PMM2	AC078795.1	0.695811	1.20712e-78	postive
SCLY	AC073195.1	0.403666	2.19794e-22	postive
ABCA9	AC092868.2	0.600206	1.15077e-53	postive
SCLY	AC092868.2	0.541369	4.5717e-42	postive
GFPT1	AC092868.2	0.403468	2.31401e-22	postive
ALG10	AC092868.2	0.538128	1.71384e-41	postive
SLC41A2	AC092868.2	0.50721	2.56153e-36	postive
SLC4A7	AC092868.2	0.703488	4.38054e-81	postive
SLC5A3	AC092868.2	0.580051	2.00048e-49	postive
PMM2	AC092868.2	0.663707	3.18105e-69	postive
ABCA9	AC092279.1	0.420725	2.30916e-24	postive
SCLY	AC092279.1	0.647068	8.70345e-65	postive
ALG10	AC092279.1	0.546226	6.13964e-43	postive
FLVCR1	AC092279.1	0.504227	7.59038e-36	postive
SLC4A7	AC092279.1	0.623765	5.0873e-59	postive
SLC5A3	AC092279.1	0.539872	8.43077e-42	postive
PMM2	AC092279.1	0.508428	1.63891e-36	postive
ABCA9	AC055855.1	0.659584	4.25149e-68	postive
SCLY	AC055855.1	0.583758	3.49459e-50	postive
ACACB	AC055855.1	0.421435	1.89914e-24	postive
B3GNTL1	AC055855.1	0.43193	1.00181e-25	postive
SLC4A7	AC055855.1	0.489271	1.50161e-33	postive
SCLY	AP006545.1	0.477592	7.80646e-32	postive
ALG10	AP006545.1	0.489729	1.28208e-33	postive
SLC4A7	AP006545.1	0.558375	3.49524e-45	postive
PMM2	AP006545.1	0.436627	2.59553e-26	postive
CYP27A1	AC090559.1	0.43754	1.9915e-26	postive
FMO2	AC090559.1	0.415209	1.03672e-23	postive
PNPLA6	AC090559.1	0.494502	2.4337e-34	postive
SLCO2B1	AC090559.1	0.825899	9.50793e-135	postive
ABCA8	AC096921.2	0.454469	1.26179e-28	postive
ABCA9	AC096921.2	0.661567	1.22799e-68	postive
SCLY	AC096921.2	0.416736	6.85918e-24	postive
SLC41A2	AC096921.2	0.459398	2.73767e-29	postive
SLC4A7	AC096921.2	0.59262	4.92007e-52	postive
SLC5A3	AC096921.2	0.528181	9.06088e-40	postive
PMM2	AC096921.2	0.494441	2.48628e-34	postive
SULT1C2	AC096921.2	0.401276	4.07638e-22	postive
ABCA9	MUC20-OT1	0.560924	1.15e-45	postive
SCLY	MUC20-OT1	0.636576	3.95986e-62	postive
ACACB	MUC20-OT1	0.439419	1.15138e-26	postive
ALG10	MUC20-OT1	0.462466	1.04462e-29	postive
SLC4A7	MUC20-OT1	0.567355	6.669e-47	postive
SLC5A3	MUC20-OT1	0.49801	7.05789e-35	postive
PMM2	MUC20-OT1	0.497535	8.35073e-35	postive
ABCA9	AC127024.5	0.612218	2.43845e-56	postive
SCLY	AC127024.5	0.692526	1.26678e-77	postive
ALG10	AC127024.5	0.520016	2.13612e-38	postive
FLVCR1	AC127024.5	0.481262	2.29307e-32	postive
SLC4A7	AC127024.5	0.697589	3.33787e-79	postive
SLC5A3	AC127024.5	0.549887	1.32225e-43	postive
PMM2	AC127024.5	0.5262	1.9663e-39	postive
ACY1	LINC02615	0.420276	2.61191e-24	postive
SLC16A11	LINC02615	0.4149	1.12672e-23	postive
ABCA9	PLCB1-IT1	0.564325	2.57102e-46	postive
SCLY	PLCB1-IT1	0.621885	1.41396e-58	postive
ALG10	PLCB1-IT1	0.638156	1.5988e-62	postive
SLC4A7	PLCB1-IT1	0.746768	1.81154e-96	postive
SLC5A3	PLCB1-IT1	0.609993	7.78146e-56	postive
SLCO1B3	PLCB1-IT1	0.539123	1.14418e-41	postive
PMM2	PLCB1-IT1	0.591158	1.00308e-51	postive
B3GNTL1	CR559946.2	0.446794	1.29658e-27	postive
SCNN1D	CR559946.2	0.551791	5.90744e-44	postive
ADCY4	CR559946.2	0.44998	4.96417e-28	postive
ABCA9	TTC3-AS1	0.696834	5.76946e-79	postive
SCLY	TTC3-AS1	0.680149	6.73899e-74	postive
ALG10	TTC3-AS1	0.573311	4.50902e-48	postive
SLC41A2	TTC3-AS1	0.406428	1.06993e-22	postive
FLVCR1	TTC3-AS1	0.420205	2.66327e-24	postive
SLC4A7	TTC3-AS1	0.810932	3.78847e-126	postive
SLC5A3	TTC3-AS1	0.748149	5.19848e-97	postive
PMM2	TTC3-AS1	0.709574	4.47002e-83	postive
SLC41A2	AL512328.1	0.447978	9.08754e-28	postive
SULT1C2	AL512328.1	0.424521	8.0804e-25	postive
ABCA8	C21orf62-AS1	0.482974	1.28823e-32	postive
ABCA9	C21orf62-AS1	0.543661	1.77995e-42	postive
SLC4A7	C21orf62-AS1	0.458002	4.2313e-29	postive
SLC5A3	C21orf62-AS1	0.515448	1.20624e-37	postive
SLC16A11	AC142472.1	0.494873	2.13643e-34	postive
SMOX	AC018695.6	0.450266	4.55193e-28	postive
SCLY	CBR3-AS1	0.417309	5.8711e-24	postive
B3GNTL1	CBR3-AS1	0.423505	1.07182e-24	postive
SLC4A7	CBR3-AS1	0.44191	5.53978e-27	postive
PMM2	CBR3-AS1	0.402203	3.20956e-22	postive
ABCA9	AC005224.3	0.448628	7.46939e-28	postive
ALG10	AC005224.3	0.59808	3.32994e-53	postive
SLC4A7	AC005224.3	0.532323	1.76483e-40	postive
PMM2	AC005224.3	0.446594	1.37685e-27	postive
ABCA9	AL731567.1	0.524323	4.07716e-39	postive
SCLY	AL731567.1	0.413439	1.66863e-23	postive
ADCY4	AL731567.1	0.40476	1.65385e-22	postive
SLC4A7	AL731567.1	0.451518	3.11174e-28	postive
ABCA9	AL096678.1	0.635491	7.35567e-62	postive
SCLY	AL096678.1	0.651437	6.33137e-66	postive
ALG10	AL096678.1	0.595234	1.36422e-52	postive
SLC4A7	AL096678.1	0.779132	3.45366e-110	postive
SLC5A3	AL096678.1	0.569299	2.78512e-47	postive
PMM2	AL096678.1	0.651462	6.23742e-66	postive
ABCA9	AL139021.2	0.563548	3.62556e-46	postive
SCLY	AL139021.2	0.605718	7.04787e-55	postive
ALG10	AL139021.2	0.489694	1.29743e-33	postive
SLC4A7	AL139021.2	0.594597	1.86609e-52	postive
SLC5A3	AL139021.2	0.509113	1.27415e-36	postive
PMM2	AL139021.2	0.523972	4.66996e-39	postive
ABCA9	AC087301.1	0.591592	8.12174e-52	postive
SCLY	AC087301.1	0.670133	5.14862e-71	postive
ALG10	AC087301.1	0.533334	1.17935e-40	postive
FLVCR1	AC087301.1	0.41578	8.88687e-24	postive
SLC4A7	AC087301.1	0.691764	2.17467e-77	postive
SLC5A3	AC087301.1	0.556209	8.92118e-45	postive
PMM2	AC087301.1	0.552525	4.32385e-44	postive
B3GNTL1	AP006621.4	0.411849	2.5534e-23	postive
SCNN1D	AP006621.4	0.463441	7.67359e-30	postive
ABCA9	AC078852.1	0.645112	2.77355e-64	postive
SCLY	AC078852.1	0.737933	4.41944e-93	postive
ALG10	AC078852.1	0.580807	1.40401e-49	postive
FLVCR1	AC078852.1	0.438319	1.58736e-26	postive
SLC4A7	AC078852.1	0.763208	3.66342e-103	postive
SLC5A3	AC078852.1	0.678073	2.72634e-73	postive
SLCO1B3	AC078852.1	0.422113	1.57546e-24	postive
PMM2	AC078852.1	0.63091	9.78202e-61	postive
ABCA9	AL390728.5	0.420778	2.27536e-24	postive
SCLY	AL390728.5	0.495842	1.51917e-34	postive
B3GNTL1	AL390728.5	0.435899	3.20421e-26	postive
SLC4A7	AL390728.5	0.404614	1.7183e-22	postive
NDUFS6	EXOC3-AS1	0.558861	2.83006e-45	postive
ABCA9	AC104532.2	0.494679	2.28714e-34	postive
SCLY	AC104532.2	0.461338	1.49031e-29	postive
ACACB	AC104532.2	0.449792	5.25527e-28	postive
ABCA8	RERG-IT1	0.534372	7.79001e-41	postive
ABCA9	RERG-IT1	0.651474	6.19198e-66	postive
SCLY	RERG-IT1	0.476509	1.11773e-31	postive
ACACB	RERG-IT1	0.447199	1.14845e-27	postive
SLC4A7	RERG-IT1	0.592999	4.08781e-52	postive
SLC5A3	RERG-IT1	0.486686	3.64808e-33	postive
PMM2	RERG-IT1	0.446096	1.59784e-27	postive
ABCA9	AL355076.2	0.510304	8.20868e-37	postive
SCNN1D	AL355076.2	0.401385	3.96382e-22	postive
SLC4A7	AL355076.2	0.555448	1.23802e-44	postive
SLC5A3	AL355076.2	0.433617	6.1826e-26	postive
PMM2	AL355076.2	0.468806	1.38201e-30	postive
ALG10	AC009318.4	0.506892	2.87828e-36	postive
ABCA8	ITGA9-AS1	0.500123	3.32476e-35	postive
ABCA9	ITGA9-AS1	0.679115	1.35399e-73	postive
SCLY	ITGA9-AS1	0.425347	6.41854e-25	postive
ACACB	ITGA9-AS1	0.453903	1.50099e-28	postive
SLC4A7	ITGA9-AS1	0.506309	3.56103e-36	postive
SLC5A3	ITGA9-AS1	0.482416	1.55499e-32	postive
PMM2	ITGA9-AS1	0.40703	9.13715e-23	postive
SULT1C2	ITGA9-AS1	0.439675	1.06825e-26	postive
ABCA9	AC100774.1	0.764357	1.18975e-103	postive
SCLY	AC100774.1	0.654979	7.33056e-67	postive
ALG10	AC100774.1	0.633348	2.48205e-61	postive
SLC4A7	AC100774.1	0.806857	6.13541e-124	postive
SLC5A3	AC100774.1	0.693573	6.01119e-78	postive
PMM2	AC100774.1	0.69587	1.15683e-78	postive
SCLY	TMCC1-AS1	0.400989	4.38852e-22	postive
ABCA9	AP001330.4	0.40996	4.21913e-23	postive
SLC4A7	AP001330.4	0.465147	4.46348e-30	postive
B3GNTL1	AL031709.1	0.483149	1.21414e-32	postive
SCNN1D	AL031709.1	0.572661	6.06782e-48	postive
ABCA9	ACBD3-AS1	0.467898	1.8515e-30	postive
SLC4A7	ACBD3-AS1	0.453129	1.90287e-28	postive
ABCA9	AC022960.1	0.687184	5.41464e-76	postive
SCLY	AC022960.1	0.663934	2.75478e-69	postive
ALG10	AC022960.1	0.622719	8.99318e-59	postive
FLVCR1	AC022960.1	0.408399	6.37342e-23	postive
SLC4A7	AC022960.1	0.809794	1.58756e-125	postive
SLC5A3	AC022960.1	0.664454	1.98056e-69	postive
PMM2	AC022960.1	0.694466	3.17405e-78	postive
ABCA9	CR936218.1	0.68509	2.30944e-75	postive
SCLY	CR936218.1	0.727361	3.33067e-89	postive
ALG10	CR936218.1	0.622397	1.07113e-58	postive
SLC41A2	CR936218.1	0.400704	4.72158e-22	postive
FLVCR1	CR936218.1	0.435987	3.1238e-26	postive
SLC4A7	CR936218.1	0.788421	1.45443e-114	postive
SLC5A3	CR936218.1	0.662187	8.31419e-69	postive
PMM2	CR936218.1	0.67114	2.67299e-71	postive
ABCA8	AC011477.3	0.51395	2.1154e-37	postive
ADH1B	AC011477.3	0.412486	2.15396e-23	postive
SCLY	AP001160.1	0.468225	1.66635e-30	postive
B3GNTL1	AP001160.1	0.47972	3.84429e-32	postive
SCNN1D	AP001160.1	0.400695	4.73292e-22	postive
ABCA9	AC087294.1	0.635342	8.00406e-62	postive
SCLY	AC087294.1	0.61453	7.23341e-57	postive
ALG10	AC087294.1	0.671879	1.64934e-71	postive
SLC4A7	AC087294.1	0.755402	6.43561e-100	postive
SLC5A3	AC087294.1	0.682566	1.3048e-74	postive
SLCO1B3	AC087294.1	0.475872	1.37928e-31	postive
PMM2	AC087294.1	0.649275	2.32798e-65	postive
OGDHL	NNT-AS1	0.430388	1.55363e-25	postive
TYMS	NNT-AS1	0.416482	7.3476e-24	postive
ABCA9	AC022558.3	0.69578	1.23459e-78	postive
SCLY	AC022558.3	0.664669	1.72761e-69	postive
ALG10	AC022558.3	0.541182	4.93475e-42	postive
SLC4A7	AC022558.3	0.704273	2.44021e-81	postive
SLC5A3	AC022558.3	0.553452	2.91171e-44	postive
PMM2	AC022558.3	0.58912	2.69132e-51	postive
ABCA9	AC027796.1	0.576945	8.48315e-49	postive
SCLY	AC027796.1	0.69689	5.53886e-79	postive
ALG10	AC027796.1	0.530661	3.41118e-40	postive
FLVCR1	AC027796.1	0.452243	2.49492e-28	postive
SLC4A7	AC027796.1	0.709043	6.70004e-83	postive
SLC5A3	AC027796.1	0.687828	3.45926e-76	postive
SLCO1B3	AC027796.1	0.460948	1.6844e-29	postive
PMM2	AC027796.1	0.593212	3.6822e-52	postive
ABCA9	H3-3A-DT	0.671975	1.54854e-71	postive
SCLY	H3-3A-DT	0.699019	1.17916e-79	postive
ALG10	H3-3A-DT	0.617924	1.19203e-57	postive
FLVCR1	H3-3A-DT	0.483719	1.00128e-32	postive
SLC4A7	H3-3A-DT	0.735017	5.41074e-92	postive
SLC5A3	H3-3A-DT	0.622966	7.86011e-59	postive
PMM2	H3-3A-DT	0.627841	5.40872e-60	postive
ABCA8	AL136369.1	0.582344	6.81622e-50	postive
ABCA9	AL136369.1	0.708463	1.04148e-82	postive
ACACB	AL136369.1	0.450945	3.70451e-28	postive
ACADL	AL136369.1	0.512526	3.59944e-37	postive
SLC4A7	AL136369.1	0.470866	7.09938e-31	postive
ABCA9	AL359878.1	0.480551	2.91088e-32	postive
SCLY	AL359878.1	0.693984	4.48134e-78	postive
ALG10	AL359878.1	0.457998	4.23649e-29	postive
FLVCR1	AL359878.1	0.496541	1.18723e-34	postive
SLC4A7	AL359878.1	0.450493	4.24905e-28	postive
PMM2	AL359878.1	0.41137	2.9011e-23	postive
ABCA9	ZBED3-AS1	0.586259	1.06302e-50	postive
SCLY	ZBED3-AS1	0.549676	1.44546e-43	postive
SLC4A7	ZBED3-AS1	0.539242	1.09025e-41	postive
SLC5A3	ZBED3-AS1	0.487273	2.9845e-33	postive
PMM2	ZBED3-AS1	0.423888	9.63512e-25	postive
ABCA9	AC012150.2	0.690546	5.14604e-77	postive
SCLY	AC012150.2	0.544437	1.29082e-42	postive
ALG10	AC012150.2	0.540834	5.69113e-42	postive
SLC4A7	AC012150.2	0.80186	2.67127e-121	postive
SLC5A3	AC012150.2	0.705049	1.36647e-81	postive
SLCO1B3	AC012150.2	0.439014	1.29589e-26	postive
PMM2	AC012150.2	0.638992	9.87697e-63	postive
ABCA9	AC006441.1	0.746474	2.35979e-96	postive
SCLY	AC006441.1	0.610248	6.81586e-56	postive
ALG10	AC006441.1	0.636329	4.55985e-62	postive
SLC41A2	AC006441.1	0.477324	8.534e-32	postive
SLC4A7	AC006441.1	0.775216	2.08543e-108	postive
SLC5A3	AC006441.1	0.665503	1.01541e-69	postive
PMM2	AC006441.1	0.709415	5.04528e-83	postive
B3GNTL1	LINC00174	0.572161	7.61858e-48	postive
SCNN1D	LINC00174	0.507637	2.19132e-36	postive
AADAC	AC114488.1	0.427404	3.60865e-25	postive
B4GALT4	AC114488.1	0.479989	3.51363e-32	postive
DECR2	DM1-AS	0.412411	2.19769e-23	postive
SCNN1D	AL645608.6	0.414481	1.26128e-23	postive
DTYMK	AC015912.3	0.421869	1.68478e-24	postive
ABCA9	AL512288.1	0.471853	5.15002e-31	postive
SCLY	AL512288.1	0.454745	1.15903e-28	postive
SLC4A7	AL512288.1	0.536242	3.67436e-41	postive
SLC5A3	AL512288.1	0.528897	6.84027e-40	postive
SLCO1B3	AL512288.1	0.547837	3.1313e-43	postive
PMM2	AL512288.1	0.434441	4.87885e-26	postive
ABCA9	GPRC5D-AS1	0.436827	2.44907e-26	postive
SCLY	GPRC5D-AS1	0.422016	1.61817e-24	postive
SCLY	ZNF252P-AS1	0.709041	6.71015e-83	postive
ALG10	ZNF252P-AS1	0.432367	8.84176e-26	postive
FLVCR1	ZNF252P-AS1	0.477378	8.38186e-32	postive
SLC4A7	ZNF252P-AS1	0.496144	1.3659e-34	postive
PMM2	ZNF252P-AS1	0.411365	2.905e-23	postive
ABCA9	AC019186.1	0.633153	2.77077e-61	postive
SCLY	AC019186.1	0.584249	2.7683e-50	postive
ALG10	AC019186.1	0.539757	8.83754e-42	postive
SLC41A2	AC019186.1	0.437388	2.08117e-26	postive
SLC4A7	AC019186.1	0.751586	2.24251e-98	postive
SLC5A3	AC019186.1	0.574802	2.2776e-48	postive
SLCO1B3	AC019186.1	0.42766	3.35805e-25	postive
PMM2	AC019186.1	0.588455	3.70769e-51	postive
ABCA9	AL133445.2	0.6723	1.2517e-71	postive
SCLY	AL133445.2	0.608812	1.43496e-55	postive
ALG10	AL133445.2	0.642326	1.4252e-63	postive
SLC4A7	AL133445.2	0.798413	1.59572e-119	postive
SLC5A3	AL133445.2	0.669474	7.89517e-71	postive
PMM2	AL133445.2	0.71213	6.28497e-84	postive
ABCA9	FLJ46284	0.626117	1.40089e-59	postive
SCLY	FLJ46284	0.537381	2.32004e-41	postive
ALG10	FLJ46284	0.682036	1.87257e-74	postive
SLC4A7	FLJ46284	0.699853	6.40687e-80	postive
SLC5A3	FLJ46284	0.587251	6.61177e-51	postive
PMM2	FLJ46284	0.6309	9.83858e-61	postive
ABCA9	AL512631.1	0.407934	7.20565e-23	postive
ABCA9	AP002336.2	0.704849	1.58716e-81	postive
SCLY	AP002336.2	0.655248	6.21629e-67	postive
ALG10	AP002336.2	0.59928	1.82976e-53	postive
SLC4A7	AP002336.2	0.782128	1.4142e-111	postive
SLC5A3	AP002336.2	0.64321	8.49223e-64	postive
PMM2	AP002336.2	0.685261	2.05227e-75	postive
ABCA9	AC008764.8	0.592464	5.30795e-52	postive
SCLY	AC008764.8	0.624132	4.16167e-59	postive
B3GNTL1	AC008764.8	0.430373	1.56008e-25	postive
SLC4A7	AC008764.8	0.531386	2.56031e-40	postive
SLC5A3	AC008764.8	0.474337	2.28604e-31	postive
PMM2	AC008764.8	0.482082	1.74011e-32	postive
ABCA9	AC109587.1	0.731305	1.25254e-90	postive
SCLY	AC109587.1	0.609998	7.76131e-56	postive
ALG10	AC109587.1	0.684328	3.90098e-75	postive
SLC41A2	AC109587.1	0.442919	4.11205e-27	postive
SLC4A7	AC109587.1	0.774523	4.2758e-108	postive
SLC5A3	AC109587.1	0.67987	8.13796e-74	postive
PMM2	AC109587.1	0.670946	3.03384e-71	postive
ABCA9	AC127024.2	0.534375	7.77864e-41	postive
SCLY	AC127024.2	0.702905	6.75377e-81	postive
ALG10	AC127024.2	0.493956	2.94709e-34	postive
FLVCR1	AC127024.2	0.425002	7.06772e-25	postive
SLC4A7	AC127024.2	0.714328	1.1439e-84	postive
SLC5A3	AC127024.2	0.6175	1.49497e-57	postive
SLCO1B3	AC127024.2	0.434168	5.27671e-26	postive
PMM2	AC127024.2	0.559918	1.78571e-45	postive
SCLY	AL355574.1	0.462693	9.72246e-30	postive
ABCA9	AC124045.1	0.497453	8.59769e-35	postive
SCLY	AC124045.1	0.430562	1.47843e-25	postive
SLC4A7	AC124045.1	0.483462	1.09219e-32	postive
TAT	AC245014.1	0.528971	6.64373e-40	postive
ABCA9	AC244197.2	0.499977	3.5027e-35	postive
SCLY	AC244197.2	0.420119	2.72649e-24	postive
SCNN1D	AC244197.2	0.507297	2.48154e-36	postive
ABCA8	AC091588.3	0.479773	3.77611e-32	postive
ABCA9	AC091588.3	0.561691	8.21637e-46	postive
ACACB	AC091588.3	0.44714	1.1689e-27	postive
SLC41A2	AC091588.3	0.401173	4.18608e-22	postive
SLC4A7	AC091588.3	0.447703	9.86855e-28	postive
SULT1C2	AC091588.3	0.484741	7.07811e-33	postive
ABCA9	AC091814.1	0.573571	4.00472e-48	postive
SCLY	AC091814.1	0.561034	1.0962e-45	postive
ALG10	AC091814.1	0.533779	9.87518e-41	postive
SLC4A7	AC091814.1	0.736363	1.71042e-92	postive
SLC5A3	AC091814.1	0.627837	5.41891e-60	postive
SLCO1B3	AC091814.1	0.504274	7.46258e-36	postive
PMM2	AC091814.1	0.589979	1.77695e-51	postive
ABCA9	NECTIN4-AS1	0.447051	1.20054e-27	postive
SCLY	NECTIN4-AS1	0.455978	7.92425e-29	postive
ALG10	NECTIN4-AS1	0.566518	9.69453e-47	postive
SLC4A7	NECTIN4-AS1	0.49946	4.21295e-35	postive
SLC5A3	NECTIN4-AS1	0.448841	7.00642e-28	postive
PMM2	NECTIN4-AS1	0.595845	1.00863e-52	postive
SCLY	AC011498.6	0.42019	2.67425e-24	postive
B3GNTL1	AC011498.6	0.471951	4.98818e-31	postive
SCNN1D	AC011498.6	0.459237	2.87904e-29	postive
ADCY4	AC011498.6	0.401514	3.83379e-22	postive
ABCA9	AC244093.4	0.723249	9.59412e-88	postive
SCLY	AC244093.4	0.623842	4.87615e-59	postive
ALG10	AC244093.4	0.64266	1.17199e-63	postive
SLC41A2	AC244093.4	0.411327	2.93466e-23	postive
SLC4A7	AC244093.4	0.793688	3.82286e-117	postive
SLC5A3	AC244093.4	0.663491	3.6491e-69	postive
PMM2	AC244093.4	0.695008	2.15067e-78	postive
ABCA9	IGBP1-AS2	0.676962	5.73289e-73	postive
SCLY	IGBP1-AS2	0.589406	2.34424e-51	postive
ALG10	IGBP1-AS2	0.637342	2.5528e-62	postive
SLC4A7	IGBP1-AS2	0.684931	2.57647e-75	postive
SLC5A3	IGBP1-AS2	0.629036	2.78483e-60	postive
PMM2	IGBP1-AS2	0.661367	1.39246e-68	postive
SCLY	AP001178.1	0.595205	1.38336e-52	postive
ALG10	AP001178.1	0.408415	6.34672e-23	postive
FLVCR1	AP001178.1	0.407822	7.4204e-23	postive
SLC4A7	AP001178.1	0.597991	3.48092e-53	postive
SLC5A3	AP001178.1	0.588256	4.0802e-51	postive
PMM2	AP001178.1	0.466054	3.34254e-30	postive
SLC4A7	AC106791.1	0.476665	1.06147e-31	postive
TAT	AC124852.1	0.423833	9.78345e-25	postive
ABCA9	AC008147.2	0.721027	5.74709e-87	postive
SCLY	AC008147.2	0.581939	8.24887e-50	postive
ALG10	AC008147.2	0.606206	5.49081e-55	postive
SLC41A2	AC008147.2	0.505368	5.01749e-36	postive
SLC4A7	AC008147.2	0.744493	1.39153e-95	postive
SLC5A3	AC008147.2	0.602494	3.63411e-54	postive
PMM2	AC008147.2	0.679493	1.04916e-73	postive
ABCA9	AC080013.3	0.554409	1.93411e-44	postive
SCLY	AC080013.3	0.400464	5.02172e-22	postive
ALG10	AC080013.3	0.457564	4.84776e-29	postive
SLC4A7	AC080013.3	0.537026	2.67812e-41	postive
PMM2	AC080013.3	0.437741	1.87818e-26	postive
ABCA9	AC099343.2	0.73522	4.55174e-92	postive
SCLY	AC099343.2	0.692592	1.20878e-77	postive
ALG10	AC099343.2	0.59753	4.37702e-53	postive
SLC41A2	AC099343.2	0.415302	1.01111e-23	postive
SLC4A7	AC099343.2	0.753891	2.64694e-99	postive
SLC5A3	AC099343.2	0.645272	2.5239e-64	postive
PMM2	AC099343.2	0.648588	3.5133e-65	postive
ABCA8	AC005180.2	0.446894	1.25818e-27	postive
FMO2	AC005180.2	0.519439	2.6627e-38	postive
ADH1B	AC005180.2	0.463833	6.77801e-30	postive
INMT	AC005180.2	0.427946	3.09804e-25	postive
ABCA9	LRIG2-DT	0.765176	5.31851e-104	postive
SCLY	LRIG2-DT	0.621118	2.14183e-58	postive
ALG10	LRIG2-DT	0.628161	4.52799e-60	postive
SLC4A7	LRIG2-DT	0.828262	3.50498e-136	postive
SLC5A3	LRIG2-DT	0.613952	9.80902e-57	postive
PMM2	LRIG2-DT	0.656324	3.20688e-67	postive
SCLY	AC109460.1	0.500656	2.74761e-35	postive
B3GNTL1	AC109460.1	0.420433	2.50155e-24	postive
SCNN1D	AC109460.1	0.422051	1.60258e-24	postive
ADCY4	AC109460.1	0.406235	1.1255e-22	postive
HMBS	URB1-AS1	0.407278	8.56037e-23	postive
DTYMK	URB1-AS1	0.401633	3.71824e-22	postive
ABCA9	AC011510.1	0.674634	2.69214e-72	postive
SCLY	AC011510.1	0.531675	2.28298e-40	postive
ALG10	AC011510.1	0.520253	1.95139e-38	postive
SLC4A7	AC011510.1	0.720639	7.83903e-87	postive
SLC5A3	AC011510.1	0.599678	1.49871e-53	postive
PMM2	AC011510.1	0.655523	5.24859e-67	postive
ABCA9	AC012442.1	0.49966	3.92314e-35	postive
SCLY	AC012442.1	0.62336	6.34172e-59	postive
ALG10	AC012442.1	0.43553	3.56425e-26	postive
FLVCR1	AC012442.1	0.451923	2.75103e-28	postive
SLC4A7	AC012442.1	0.532243	1.82187e-40	postive
SLC5A3	AC012442.1	0.466112	3.2809e-30	postive
PMM2	AC012442.1	0.443661	3.30041e-27	postive
OGDHL	DSCR8	0.412594	2.09271e-23	postive
GALE	LBX2-AS1	0.443566	3.39435e-27	postive
SCNN1D	AL020996.1	0.456175	7.4555e-29	postive
ABCA9	AC005746.2	0.580553	1.58106e-49	postive
SCLY	AC005746.2	0.58746	5.98264e-51	postive
ALG10	AC005746.2	0.525283	2.80906e-39	postive
SLC4A7	AC005746.2	0.687781	3.57486e-76	postive
SLC5A3	AC005746.2	0.553053	3.45232e-44	postive
PMM2	AC005746.2	0.569974	2.05349e-47	postive
ADH1B	LINC01412	0.449499	5.74284e-28	postive
ADCY4	AL355803.1	0.491603	6.69848e-34	postive
ABCA8	AC112722.1	0.44548	1.92083e-27	postive
ABCA9	AC112722.1	0.572343	7.01275e-48	postive
SCLY	AC112722.1	0.443077	3.92345e-27	postive
ACADL	AC112722.1	0.408821	5.70268e-23	postive
SLC4A7	AC112722.1	0.509287	1.1949e-36	postive
SLC5A3	AC112722.1	0.586169	1.10974e-50	postive
ABCA9	AC022001.3	0.721944	2.75173e-87	postive
SCLY	AC022001.3	0.629569	2.07068e-60	postive
ALG10	AC022001.3	0.595662	1.10449e-52	postive
SLC41A2	AC022001.3	0.442674	4.42113e-27	postive
SLC4A7	AC022001.3	0.760204	6.71915e-102	postive
SLC5A3	AC022001.3	0.669972	5.71719e-71	postive
SLCO1B3	AC022001.3	0.433545	6.31026e-26	postive
PMM2	AC022001.3	0.675691	1.33661e-72	postive
ABCA9	LCMT1-AS2	0.743422	3.60675e-95	postive
SCLY	LCMT1-AS2	0.665627	9.37918e-70	postive
ALG10	LCMT1-AS2	0.625231	2.28027e-59	postive
SLC4A7	LCMT1-AS2	0.837393	6.21675e-142	postive
SLC5A3	LCMT1-AS2	0.676386	8.41908e-73	postive
PMM2	LCMT1-AS2	0.707432	2.27449e-82	postive
ABCA9	PPM1F-AS1	0.66177	1.08077e-68	postive
SCLY	PPM1F-AS1	0.679162	1.31184e-73	postive
ALG10	PPM1F-AS1	0.563672	3.43214e-46	postive
SLC4A7	PPM1F-AS1	0.69133	2.95707e-77	postive
SLC5A3	PPM1F-AS1	0.578135	4.8847e-49	postive
PMM2	PPM1F-AS1	0.604041	1.6578e-54	postive
B3GNTL1	AL691482.3	0.408052	6.98437e-23	postive
SCNN1D	AL691482.3	0.451106	3.52735e-28	postive
SLC26A6	AC008735.2	0.444425	2.6299e-27	postive
ABCA9	ARAP1-AS2	0.750883	4.28122e-98	postive
SCLY	ARAP1-AS2	0.676437	8.13543e-73	postive
ALG10	ARAP1-AS2	0.606811	4.02571e-55	postive
SLC4A7	ARAP1-AS2	0.749922	1.03318e-97	postive
SLC5A3	ARAP1-AS2	0.686364	9.56941e-76	postive
PMM2	ARAP1-AS2	0.692794	1.04713e-77	postive
ABCA9	ASAP1-IT2	0.643007	9.56795e-64	postive
SCLY	ASAP1-IT2	0.60612	5.73712e-55	postive
ALG10	ASAP1-IT2	0.57105	1.2618e-47	postive
SLC4A7	ASAP1-IT2	0.802558	1.15487e-121	postive
SLC5A3	ASAP1-IT2	0.641892	1.83603e-63	postive
PMM2	ASAP1-IT2	0.669398	8.29575e-71	postive
ABCA8	LINC01936	0.532925	1.38844e-40	postive
FMO2	LINC01936	0.740838	3.52099e-94	postive
ACADL	LINC01936	0.425145	6.79176e-25	postive
PLA2G5	LINC01936	0.423509	1.07057e-24	postive
ADH1B	LINC01936	0.689506	1.06926e-76	postive
ADCY4	LINC01936	0.403262	2.44072e-22	postive
INMT	LINC01936	0.706135	6.04812e-82	postive
OTC	LINC01936	0.434337	5.02701e-26	postive
ABCA9	TCF4-AS1	0.632141	4.90236e-61	postive
SCLY	TCF4-AS1	0.540495	6.53828e-42	postive
ALG10	TCF4-AS1	0.580117	1.9392e-49	postive
SLC4A7	TCF4-AS1	0.811118	2.99651e-126	postive
SLC5A3	TCF4-AS1	0.587843	4.97805e-51	postive
PMM2	TCF4-AS1	0.627948	5.09603e-60	postive
ABCA9	AC092431.1	0.406919	9.40638e-23	postive
ALG10	AC092431.1	0.423618	1.03866e-24	postive
SLC4A7	AC092431.1	0.457695	4.65391e-29	postive
ABCA9	AC025569.1	0.537641	2.08827e-41	postive
SCLY	AC025569.1	0.477333	8.50918e-32	postive
ALG10	AC025569.1	0.432246	9.15361e-26	postive
SLC4A7	AC025569.1	0.615256	4.92609e-57	postive
SLC5A3	AC025569.1	0.556191	8.99371e-45	postive
PMM2	AC025569.1	0.511731	4.83779e-37	postive
ABCA8	AC008764.2	0.465671	3.77659e-30	postive
ABCA9	AC008764.2	0.450844	3.82029e-28	postive
CYC1	AC008764.2	-0.405946	1.21377e-22	negative
ACACB	AC008764.2	0.466686	2.73078e-30	postive
GAPDH	AC008764.2	-0.40752	8.03299e-23	negative
TPI1	AC008764.2	-0.461196	1.5583e-29	negative
ADH1B	AC008764.2	0.458256	3.90977e-29	postive
NME1	AC008764.2	-0.474616	2.08568e-31	negative
NME2	AC008764.2	-0.406225	1.12828e-22	negative
DTYMK	AC008764.2	-0.434681	4.55295e-26	negative
TK1	AC008764.2	-0.407182	8.78083e-23	negative
SCLY	LENG8-AS1	0.430265	1.60857e-25	postive
B3GNTL1	LENG8-AS1	0.432936	7.51482e-26	postive
SCNN1D	LENG8-AS1	0.429879	1.79445e-25	postive
ABCA9	U91328.3	0.560493	1.38877e-45	postive
SCLY	U91328.3	0.468682	1.43841e-30	postive
ABCA9	SIDT1-AS1	0.691292	3.03764e-77	postive
SCLY	SIDT1-AS1	0.6025	3.62224e-54	postive
ALG10	SIDT1-AS1	0.589315	2.44898e-51	postive
SLC4A7	SIDT1-AS1	0.830908	8.20633e-138	postive
SLC5A3	SIDT1-AS1	0.566265	1.08522e-46	postive
PMM2	SIDT1-AS1	0.653104	2.30346e-66	postive
ABCA9	LINC02656	0.68464	3.14948e-75	postive
SCLY	LINC02656	0.523422	5.77763e-39	postive
ALG10	LINC02656	0.508323	1.70383e-36	postive
SLC4A7	LINC02656	0.725993	1.02603e-88	postive
SLC5A3	LINC02656	0.543327	2.04304e-42	postive
PMM2	LINC02656	0.603023	2.78006e-54	postive
ABCA9	AL139807.1	0.67405	3.96074e-72	postive
SCLY	AL139807.1	0.600492	9.96809e-54	postive
ALG10	AL139807.1	0.525257	2.83784e-39	postive
SLC4A7	AL139807.1	0.749308	1.81104e-97	postive
SLC5A3	AL139807.1	0.667482	2.85811e-70	postive
PMM2	AL139807.1	0.649293	2.30384e-65	postive
SLC4A7	AC083906.3	0.524718	3.49853e-39	postive
SLCO1B3	AC083906.3	0.40389	2.07397e-22	postive
ABCA9	WWTR1-IT1	0.578509	4.1061e-49	postive
SCLY	WWTR1-IT1	0.583674	3.63625e-50	postive
ALG10	WWTR1-IT1	0.520075	2.08902e-38	postive
SLC4A7	WWTR1-IT1	0.735054	5.24602e-92	postive
SLC5A3	WWTR1-IT1	0.655868	4.24622e-67	postive
SLCO1B3	WWTR1-IT1	0.457226	5.38381e-29	postive
PMM2	WWTR1-IT1	0.61216	2.51398e-56	postive
ABCA8	AF131215.5	0.513022	2.99212e-37	postive
ABCA9	AF131215.5	0.719734	1.61628e-86	postive
FMO2	AF131215.5	0.401307	4.04348e-22	postive
ACACB	AF131215.5	0.450769	3.90817e-28	postive
SLC41A2	AF131215.5	0.412629	2.0731e-23	postive
SLC4A7	AF131215.5	0.467886	1.85861e-30	postive
ABCA8	AC068700.1	0.419749	3.01796e-24	postive
ABCA9	AC068700.1	0.599343	1.77256e-53	postive
ALG10	AC068700.1	0.432072	9.62037e-26	postive
SLC4A7	AC068700.1	0.556683	7.27335e-45	postive
ABCA9	AC092574.2	0.646281	1.3889e-64	postive
SCLY	AC092574.2	0.714238	1.227e-84	postive
ALG10	AC092574.2	0.611898	2.88265e-56	postive
FLVCR1	AC092574.2	0.437192	2.20326e-26	postive
SLC4A7	AC092574.2	0.771646	8.16427e-107	postive
SLC5A3	AC092574.2	0.686797	7.08671e-76	postive
SLCO1B3	AC092574.2	0.432772	7.87428e-26	postive
PMM2	AC092574.2	0.646668	1.10384e-64	postive
ABCA9	AL360169.2	0.741038	2.9553e-94	postive
SCLY	AL360169.2	0.661037	1.71291e-68	postive
ALG10	AL360169.2	0.591503	8.48237e-52	postive
FLVCR1	AL360169.2	0.421515	1.85755e-24	postive
SLC4A7	AL360169.2	0.777719	1.53154e-109	postive
SLC5A3	AL360169.2	0.651059	7.95727e-66	postive
PMM2	AL360169.2	0.661689	1.13755e-68	postive
ABCA9	AC051619.3	0.614581	7.0387e-57	postive
SCLY	AC051619.3	0.475064	1.80023e-31	postive
SLC4A7	AC051619.3	0.584357	2.63049e-50	postive
SLC5A3	AC051619.3	0.515626	1.12809e-37	postive
PMM2	AC051619.3	0.471213	6.34083e-31	postive
ABCA9	AC131159.1	0.757813	6.6017e-101	postive
SCLY	AC131159.1	0.602616	3.41652e-54	postive
ALG10	AC131159.1	0.578468	4.18535e-49	postive
SLC41A2	AC131159.1	0.434235	5.17724e-26	postive
SLC4A7	AC131159.1	0.661745	1.09776e-68	postive
SLC5A3	AC131159.1	0.602048	4.55209e-54	postive
PMM2	AC131159.1	0.602939	2.90061e-54	postive
ABCA9	LINC00244	0.593738	2.8465e-52	postive
SCLY	LINC00244	0.649046	2.67046e-65	postive
ALG10	LINC00244	0.562477	5.81642e-46	postive
SLC4A7	LINC00244	0.726409	7.29563e-89	postive
SLC5A3	LINC00244	0.518636	3.61307e-38	postive
PMM2	LINC00244	0.566895	8.19149e-47	postive
ABCA9	AC093726.2	0.589223	2.56112e-51	postive
SCLY	AC093726.2	0.508573	1.55437e-36	postive
B3GNTL1	AC093726.2	0.462868	9.19801e-30	postive
SCNN1D	AC093726.2	0.401964	3.41423e-22	postive
SLC4A7	AC093726.2	0.461896	1.25011e-29	postive
SLC5A3	AC093726.2	0.405135	1.5001e-22	postive
SCLY	AL353708.3	0.609335	1.09495e-55	postive
FLVCR1	AL353708.3	0.43482	4.3746e-26	postive
SLC4A7	AL353708.3	0.40356	2.25958e-22	postive
BHMT	ANK3-DT	0.411032	3.17388e-23	postive
FMO2	AC010976.2	0.477579	7.84205e-32	postive
ACADL	AC010976.2	0.480793	2.68381e-32	postive
ADH1B	AC010976.2	0.473829	2.70075e-31	postive
ADCY4	AC010976.2	0.758392	3.80393e-101	postive
INMT	AC010976.2	0.599342	1.77371e-53	postive
B3GNTL1	CSGALNACT2-DT	0.442474	4.68931e-27	postive
GCLM	AC009275.1	0.489531	1.37269e-33	postive
GSR	AC009275.1	0.455287	9.80855e-29	postive
G6PD	AC009275.1	0.45807	4.14221e-29	postive
TXNRD1	AC009275.1	0.520303	1.91479e-38	postive
ABCA9	DANT2	0.681217	3.26753e-74	postive
SCLY	DANT2	0.50254	1.39629e-35	postive
ALG10	DANT2	0.484993	6.49851e-33	postive
SLC4A7	DANT2	0.633828	1.89118e-61	postive
SLC5A3	DANT2	0.631768	6.0449e-61	postive
SLCO1B3	DANT2	0.53139	2.55571e-40	postive
PMM2	DANT2	0.539238	1.0919e-41	postive
SLC4A7	C21orf91-OT1	0.538532	1.45486e-41	postive
ABCA9	GLYCTK-AS1	0.707478	2.19623e-82	postive
SCLY	GLYCTK-AS1	0.696308	8.43996e-79	postive
ALG10	GLYCTK-AS1	0.544862	1.08233e-42	postive
SLC41A2	GLYCTK-AS1	0.425149	6.78377e-25	postive
SLC4A7	GLYCTK-AS1	0.740317	5.56041e-94	postive
SLC5A3	GLYCTK-AS1	0.637296	2.62044e-62	postive
PMM2	GLYCTK-AS1	0.639765	6.31789e-63	postive
SCLY	AC145423.1	0.526431	1.79689e-39	postive
B3GNTL1	AC145423.1	0.46206	1.18717e-29	postive
ABCA9	AL157838.1	0.518346	4.03444e-38	postive
SCLY	AL157838.1	0.534733	6.73956e-41	postive
ALG10	AL157838.1	0.507778	2.08051e-36	postive
SLC4A7	AL157838.1	0.660461	2.45691e-68	postive
SLC5A3	AL157838.1	0.526147	2.00761e-39	postive
PMM2	AL157838.1	0.539509	9.7765e-42	postive
SCLY	AC000068.2	0.464371	5.71365e-30	postive
ACACB	AC000068.2	0.409229	5.12025e-23	postive
SCLY	AL928654.2	0.523333	5.97889e-39	postive
B3GNTL1	AL928654.2	0.40751	8.05424e-23	postive
SCNN1D	AL928654.2	0.614749	6.44191e-57	postive
SRD5A3	AC069200.1	0.686576	8.26354e-76	postive
ACY3	AC105290.1	0.552909	3.67052e-44	postive
FTCD	AC105290.1	0.575732	1.485e-48	postive
ABCA9	AL121845.4	0.645551	2.14011e-64	postive
SCLY	AL121845.4	0.734688	7.16816e-92	postive
ALG10	AL121845.4	0.543554	1.85999e-42	postive
SLC4A7	AL121845.4	0.650849	9.03287e-66	postive
SLC5A3	AL121845.4	0.650144	1.38128e-65	postive
PMM2	AL121845.4	0.599678	1.49896e-53	postive
XDH	AC092484.1	0.466643	2.76896e-30	postive
ABCA9	AC012676.3	0.584538	2.41414e-50	postive
SCLY	AC012676.3	0.69447	3.16513e-78	postive
ALG10	AC012676.3	0.551163	7.70977e-44	postive
FLVCR1	AC012676.3	0.433596	6.22015e-26	postive
SLC4A7	AC012676.3	0.743049	5.02083e-95	postive
SLC5A3	AC012676.3	0.623292	6.58379e-59	postive
PMM2	AC012676.3	0.641824	1.91052e-63	postive
ABCA9	AC060780.1	0.469124	1.24755e-30	postive
SCLY	AC060780.1	0.531575	2.37485e-40	postive
ACACB	AC060780.1	0.437828	1.83117e-26	postive
SCLY	AC019205.1	0.503618	9.46369e-36	postive
SLC4A7	AC019205.1	0.417339	5.8235e-24	postive
ABCA9	AC008083.3	0.503828	8.77173e-36	postive
SLC4A7	AC008083.3	0.470058	9.22254e-31	postive
SLC5A3	AC008083.3	0.425241	6.6122e-25	postive
ABCA9	AC012360.1	0.469813	9.98469e-31	postive
SCLY	AC012360.1	0.62738	6.97977e-60	postive
ALG10	AC012360.1	0.508486	1.60454e-36	postive
SLC4A7	AC012360.1	0.529734	4.91953e-40	postive
SLC5A3	AC012360.1	0.525096	3.02161e-39	postive
PMM2	AC012360.1	0.470962	6.88051e-31	postive
ADCY4	NR4A1AS	0.422313	1.49055e-24	postive
ABCA9	MIR222HG	0.594351	2.10618e-52	postive
SCLY	MIR222HG	0.45633	7.107e-29	postive
SLC4A7	MIR222HG	0.592352	5.60835e-52	postive
SLC5A3	MIR222HG	0.743632	2.995e-95	postive
SLC9A7	MIR222HG	0.42493	7.21052e-25	postive
PMM2	MIR222HG	0.549897	1.31701e-43	postive
DECR2	AC132872.2	0.428135	2.93748e-25	postive
B3GNTL1	AC132872.2	0.530223	4.05708e-40	postive
SLC16A11	AC132872.2	0.527066	1.40227e-39	postive
ABCA9	AL592430.1	0.629232	2.49789e-60	postive
SCLY	AL592430.1	0.570638	1.52082e-47	postive
ALG10	AL592430.1	0.441427	6.38566e-27	postive
SLC4A7	AL592430.1	0.712945	3.34766e-84	postive
SLC5A3	AL592430.1	0.710863	1.66598e-83	postive
PMM2	AL592430.1	0.565407	1.59013e-46	postive
SCNN1D	AATBC	0.429268	2.13327e-25	postive
SCLY	U73166.1	0.435871	3.2302e-26	postive
SCNN1D	U73166.1	0.466625	2.78462e-30	postive
SCLY	LINC01993	0.421911	1.66542e-24	postive
ALG10	LINC01993	0.407447	8.18884e-23	postive
ABCA9	AP005136.3	0.568818	3.45806e-47	postive
SCLY	AP005136.3	0.689223	1.30386e-76	postive
ALG10	AP005136.3	0.568726	3.60473e-47	postive
FLVCR1	AP005136.3	0.486057	4.52228e-33	postive
SLC4A7	AP005136.3	0.718439	4.52367e-86	postive
SLC5A3	AP005136.3	0.578034	5.11908e-49	postive
PMM2	AP005136.3	0.562008	7.1496e-46	postive
ABCA9	EML4-AS1	0.565498	1.52741e-46	postive
SCLY	EML4-AS1	0.508494	1.59998e-36	postive
ALG10	EML4-AS1	0.570656	1.50883e-47	postive
SLC4A7	EML4-AS1	0.669709	6.78015e-71	postive
SLC5A3	EML4-AS1	0.555852	1.04065e-44	postive
PMM2	EML4-AS1	0.533468	1.11813e-40	postive
KMO	EML4-AS1	0.487248	3.00952e-33	postive
SCLY	AC239803.1	0.431204	1.23196e-25	postive
SLC4A7	AC239803.1	0.43756	1.97956e-26	postive
SLC5A3	AC239803.1	0.403163	2.50394e-22	postive
GART	PCAT14	0.424844	7.38591e-25	postive
ABCA9	AC022613.3	0.722827	1.34982e-87	postive
SCLY	AC022613.3	0.535175	5.64343e-41	postive
ALG10	AC022613.3	0.521947	1.01966e-38	postive
SLC41A2	AC022613.3	0.475709	1.45556e-31	postive
SLC4A7	AC022613.3	0.687914	3.25808e-76	postive
SLC5A3	AC022613.3	0.584425	2.54607e-50	postive
PMM2	AC022613.3	0.637508	2.32022e-62	postive
ABCA9	AC005021.1	0.662438	7.09738e-69	postive
SCLY	AC005021.1	0.608584	1.61451e-55	postive
ALG10	AC005021.1	0.531563	2.38632e-40	postive
SLC4A7	AC005021.1	0.654402	1.04352e-66	postive
SLC5A3	AC005021.1	0.792854	9.91411e-117	postive
PMM2	AC005021.1	0.614331	8.03316e-57	postive
UGT2B15	MGAT3-AS1	0.505468	4.83701e-36	postive
SLC41A2	MGAT3-AS1	0.468259	1.64852e-30	postive
SULT1C2	MGAT3-AS1	0.437337	2.11241e-26	postive
ABCA9	COL4A2-AS1	0.545788	7.36625e-43	postive
SCLY	COL4A2-AS1	0.452028	2.66434e-28	postive
SLC4A7	COL4A2-AS1	0.478295	6.18168e-32	postive
SLC5A3	COL4A2-AS1	0.405124	1.50421e-22	postive
PMM2	COL4A2-AS1	0.402105	3.29208e-22	postive
ABCA9	IGBP1-AS1	0.528785	7.14758e-40	postive
SCLY	IGBP1-AS1	0.476467	1.13329e-31	postive
ALG10	IGBP1-AS1	0.410863	3.32013e-23	postive
B3GNTL1	IGBP1-AS1	0.441742	5.82142e-27	postive
SLC4A7	IGBP1-AS1	0.403843	2.09932e-22	postive
PMM2	IGBP1-AS1	0.402899	2.6811e-22	postive
ABCA8	AC005740.4	0.457511	4.92774e-29	postive
ABCA9	AC005740.4	0.610208	6.95899e-56	postive
SLC4A7	AC005740.4	0.547847	3.11826e-43	postive
SLC5A3	AC005740.4	0.530909	3.09287e-40	postive
SLCO1B3	AC005740.4	0.494931	2.09364e-34	postive
ABCA9	AL355312.2	0.619907	4.11675e-58	postive
SCLY	AL355312.2	0.492261	5.32816e-34	postive
ALG10	AL355312.2	0.466333	3.05696e-30	postive
SLC4A7	AL355312.2	0.555739	1.09248e-44	postive
SLC5A3	AL355312.2	0.450798	3.87422e-28	postive
PMM2	AL355312.2	0.551217	7.5373e-44	postive
SMOX	LINP1	0.460525	1.92362e-29	postive
SLC7A11	LINP1	0.417787	5.1563e-24	postive
ATP6V1C2	AC108865.1	0.677889	3.08456e-73	postive
ABCA9	AC015853.1	0.749521	1.49053e-97	postive
SCLY	AC015853.1	0.651644	5.58907e-66	postive
ALG10	AC015853.1	0.524552	3.73163e-39	postive
SLC4A7	AC015853.1	0.723375	8.66145e-88	postive
SLC5A3	AC015853.1	0.630813	1.03334e-60	postive
PMM2	AC015853.1	0.634446	1.3327e-61	postive
ABCA9	AC015849.4	0.615403	4.55849e-57	postive
SCLY	AC015849.4	0.67515	1.91394e-72	postive
ALG10	AC015849.4	0.628159	4.53317e-60	postive
FLVCR1	AC015849.4	0.455785	8.40949e-29	postive
SLC4A7	AC015849.4	0.761412	2.09538e-102	postive
SLC5A3	AC015849.4	0.661177	1.56925e-68	postive
PMM2	AC015849.4	0.652591	3.14699e-66	postive
ABCA9	AC005104.1	0.605699	7.11945e-55	postive
SCLY	AC005104.1	0.731298	1.25972e-90	postive
ALG10	AC005104.1	0.516286	8.79523e-38	postive
FLVCR1	AC005104.1	0.406837	9.61236e-23	postive
SLC4A7	AC005104.1	0.732425	4.88206e-91	postive
SLC5A3	AC005104.1	0.508851	1.40325e-36	postive
PMM2	AC005104.1	0.598857	2.25982e-53	postive
ABCA9	AC009686.1	0.545504	8.2915e-43	postive
SCLY	AC009686.1	0.616475	2.5811e-57	postive
ALG10	AC009686.1	0.64835	4.05088e-65	postive
FLVCR1	AC009686.1	0.409589	4.655e-23	postive
SLC4A7	AC009686.1	0.75418	2.02106e-99	postive
SLC5A3	AC009686.1	0.607559	2.73983e-55	postive
PMM2	AC009686.1	0.669583	7.35681e-71	postive
ABCA9	AL049869.2	0.756509	2.27042e-100	postive
SCLY	AL049869.2	0.671834	1.69818e-71	postive
ALG10	AL049869.2	0.649931	1.5707e-65	postive
SLC4A7	AL049869.2	0.760039	7.8709e-102	postive
SLC5A3	AL049869.2	0.66328	4.16859e-69	postive
PMM2	AL049869.2	0.68553	1.70448e-75	postive
ABCA9	MGC27382	0.418589	4.14399e-24	postive
ACADL	MGC27382	0.428702	2.50373e-25	postive
SLC4A7	MGC27382	0.42161	1.80978e-24	postive
SLC5A3	MGC27382	0.402288	3.14056e-22	postive
ADH1B	LINC01836	0.416321	7.67589e-24	postive
ABCA9	AC090515.5	0.659836	3.63192e-68	postive
SCLY	AC090515.5	0.547704	3.31053e-43	postive
ALG10	AC090515.5	0.588783	3.16608e-51	postive
SLC41A2	AC090515.5	0.402276	3.14976e-22	postive
SLC4A7	AC090515.5	0.799699	3.50091e-120	postive
SLC5A3	AC090515.5	0.633844	1.87427e-61	postive
PMM2	AC090515.5	0.677096	5.24121e-73	postive
ABCA9	AC020916.1	0.62623	1.31657e-59	postive
SCLY	AC020916.1	0.537309	2.3879e-41	postive
ALG10	AC020916.1	0.510547	7.50539e-37	postive
SLC4A7	AC020916.1	0.638775	1.11936e-62	postive
SLC5A3	AC020916.1	0.535479	4.99521e-41	postive
PMM2	AC020916.1	0.604904	1.06817e-54	postive
ABCA9	NCOA7-AS1	0.717095	1.30851e-85	postive
SCLY	NCOA7-AS1	0.608599	1.60243e-55	postive
ALG10	NCOA7-AS1	0.57297	5.26987e-48	postive
SLC4A7	NCOA7-AS1	0.768578	1.81051e-105	postive
SLC5A3	NCOA7-AS1	0.610654	5.51784e-56	postive
PMM2	NCOA7-AS1	0.649823	1.67545e-65	postive
ABCA8	AC027288.3	0.422304	1.49414e-24	postive
ABCA9	AL031651.2	0.821886	2.30585e-132	postive
SCLY	AL031651.2	0.609904	8.15013e-56	postive
ALG10	AL031651.2	0.52453	3.76302e-39	postive
SLC4A7	AL031651.2	0.683706	5.98298e-75	postive
SLC5A3	AL031651.2	0.561046	1.09032e-45	postive
PMM2	AL031651.2	0.596667	6.71605e-53	postive
BDH1	LINC02012	0.587418	6.10526e-51	postive
SCLY	CATIP-AS2	0.407327	8.45226e-23	postive
PMM2	CATIP-AS2	0.414627	1.21266e-23	postive
ABCA9	AC011479.2	0.544031	1.52715e-42	postive
SCLY	AC011479.2	0.535973	4.09542e-41	postive
SLC4A7	AC011479.2	0.525832	2.26935e-39	postive
PMM2	AC011479.2	0.476929	9.72507e-32	postive
ABCA9	AL449423.1	0.513404	2.59465e-37	postive
SCLY	AL449423.1	0.42777	3.2551e-25	postive
SLC4A7	AL449423.1	0.409504	4.76075e-23	postive
ABCA9	AL731566.2	0.67245	1.1343e-71	postive
SCLY	AL731566.2	0.687898	3.29372e-76	postive
ACACB	AL731566.2	0.402081	3.31225e-22	postive
ALG10	AL731566.2	0.486267	4.20934e-33	postive
FLVCR1	AL731566.2	0.456516	6.70983e-29	postive
SLC4A7	AL731566.2	0.6832	8.45675e-75	postive
SLC5A3	AL731566.2	0.582971	5.07045e-50	postive
PMM2	AL731566.2	0.559516	2.1284e-45	postive
ABCA9	AC009145.1	0.748644	3.314e-97	postive
SCLY	AC009145.1	0.648478	3.75215e-65	postive
ALG10	AC009145.1	0.613751	1.09048e-56	postive
SLC4A7	AC009145.1	0.744453	1.44242e-95	postive
SLC5A3	AC009145.1	0.570787	1.42196e-47	postive
PMM2	AC009145.1	0.614789	6.30622e-57	postive
SCLY	AC010809.2	0.497505	8.44131e-35	postive
B3GNTL1	AC010809.2	0.41853	4.21166e-24	postive
SCNN1D	AL022341.1	0.520179	2.00709e-38	postive
ABCA9	SEC24B-AS1	0.459325	2.80088e-29	postive
SCLY	SEC24B-AS1	0.419825	2.95552e-24	postive
B3GNTL1	SEC24B-AS1	0.40722	8.69298e-23	postive
ABCA9	AC093799.1	0.647628	6.23309e-65	postive
SCLY	AC093799.1	0.5766	9.94804e-49	postive
ALG10	AC093799.1	0.533833	9.66259e-41	postive
SLC41A2	AC093799.1	0.500468	2.9383e-35	postive
SLC4A7	AC093799.1	0.675927	1.1425e-72	postive
SLC5A3	AC093799.1	0.603975	1.71433e-54	postive
PMM2	AC093799.1	0.642938	9.96193e-64	postive
ABCA9	ANKRD44-IT1	0.729965	3.84454e-90	postive
SCLY	ANKRD44-IT1	0.580045	2.00603e-49	postive
ALG10	ANKRD44-IT1	0.599652	1.51883e-53	postive
SLC4A7	ANKRD44-IT1	0.787255	5.29639e-114	postive
SLC5A3	ANKRD44-IT1	0.674855	2.32625e-72	postive
PMM2	ANKRD44-IT1	0.672923	8.31544e-72	postive
SCLY	AC139149.1	0.409397	4.89708e-23	postive
ABCA8	AL357093.1	0.438092	1.69591e-26	postive
ABCA9	AL357093.1	0.643259	8.25154e-64	postive
SCLY	AL357093.1	0.415101	1.06723e-23	postive
SLC4A7	AL357093.1	0.544073	1.50092e-42	postive
SLC5A3	AL357093.1	0.422297	1.49714e-24	postive
PMM2	AL357093.1	0.405094	1.51623e-22	postive
ADCY4	AC044849.1	0.45962	2.55414e-29	postive
ABCA9	Z68871.1	0.765144	5.49108e-104	postive
SCLY	Z68871.1	0.579172	3.01536e-49	postive
ALG10	Z68871.1	0.574847	2.23142e-48	postive
SLC4A7	Z68871.1	0.746017	3.55985e-96	postive
SLC5A3	Z68871.1	0.660677	2.14708e-68	postive
SLC9A7	Z68871.1	0.423827	9.80008e-25	postive
PMM2	Z68871.1	0.634879	1.04164e-61	postive
ABCA9	MROCKI	0.418022	4.83682e-24	postive
SCLY	MROCKI	0.425266	6.56571e-25	postive
B3GNTL1	AP006621.3	0.461688	1.33483e-29	postive
SCNN1D	AP006621.3	0.405806	1.25891e-22	postive
ABCA9	TTC28-AS1	0.463294	8.03866e-30	postive
SCLY	TTC28-AS1	0.509159	1.25252e-36	postive
ACACB	TTC28-AS1	0.412912	1.92199e-23	postive
SLC4A7	TTC28-AS1	0.405558	1.34312e-22	postive
GCLM	LINC01564	0.419767	3.00262e-24	postive
CPOX	LINC01564	0.413717	1.54903e-23	postive
NME1	MIR4435-2HG	0.472333	4.40387e-31	postive
HPRT1	MIR4435-2HG	0.448801	7.09053e-28	postive
DTYMK	MIR4435-2HG	0.478985	4.912e-32	postive
ABCA9	FLNB-AS1	0.611912	2.86224e-56	postive
SCLY	FLNB-AS1	0.60819	1.97935e-55	postive
ALG10	FLNB-AS1	0.452987	1.98771e-28	postive
SLC41A2	FLNB-AS1	0.461648	1.35173e-29	postive
SLC4A7	FLNB-AS1	0.619062	6.48203e-58	postive
SLC5A3	FLNB-AS1	0.474719	2.01622e-31	postive
PMM2	FLNB-AS1	0.557852	4.38529e-45	postive
SULT1C2	FLNB-AS1	0.403474	2.31019e-22	postive
ABCA9	AC017006.2	0.761899	1.30801e-102	postive
SCLY	AC017006.2	0.532782	1.46964e-40	postive
ALG10	AC017006.2	0.655826	4.35689e-67	postive
SLC4A7	AC017006.2	0.763253	3.50619e-103	postive
SLC5A3	AC017006.2	0.640251	4.76748e-63	postive
PMM2	AC017006.2	0.664574	1.83527e-69	postive
ABCA8	AL391807.1	0.407201	8.73546e-23	postive
ABCA9	AL391807.1	0.552767	3.90031e-44	postive
SCLY	AL391807.1	0.462627	9.92589e-30	postive
ALG10	AL391807.1	0.411652	2.69084e-23	postive
SLC4A7	AL391807.1	0.42623	5.01573e-25	postive
XDH	AC012464.1	0.527324	1.26798e-39	postive
SLCO2B1	LINC02345	0.435168	3.95669e-26	postive
B3GNTL1	AC015802.4	0.513665	2.35373e-37	postive
ABCA9	AL731569.1	0.48048	2.98035e-32	postive
SCLY	AL731569.1	0.570956	1.31669e-47	postive
B3GNTL1	AL731569.1	0.432311	8.98472e-26	postive
SLC4A7	AL731569.1	0.439485	1.12934e-26	postive
ABCA9	ABCC5-AS1	0.632953	3.10254e-61	postive
SCLY	ABCC5-AS1	0.605947	6.27102e-55	postive
ALG10	ABCC5-AS1	0.634337	1.41725e-61	postive
SLC4A7	ABCC5-AS1	0.765845	2.74885e-104	postive
SLC5A3	ABCC5-AS1	0.609767	8.75084e-56	postive
PMM2	ABCC5-AS1	0.657942	1.18043e-67	postive
ABCA9	AL391839.1	0.714957	7.00273e-85	postive
SCLY	AL391839.1	0.667757	2.39383e-70	postive
ALG10	AL391839.1	0.621426	1.81316e-58	postive
SLC4A7	AL391839.1	0.797853	3.08009e-119	postive
SLC5A3	AL391839.1	0.689376	1.1714e-76	postive
PMM2	AL391839.1	0.692371	1.41397e-77	postive
ABCA9	CLIP1-AS1	0.718051	6.15267e-86	postive
SCLY	CLIP1-AS1	0.633571	2.1879e-61	postive
ALG10	CLIP1-AS1	0.67644	8.11864e-73	postive
SLC41A2	CLIP1-AS1	0.448669	7.37877e-28	postive
SLC4A7	CLIP1-AS1	0.76065	4.37212e-102	postive
SLC5A3	CLIP1-AS1	0.71795	6.66593e-86	postive
PMM2	CLIP1-AS1	0.707579	2.03468e-82	postive
ABCA9	LINC02595	0.554923	1.55167e-44	postive
SCLY	LINC02595	0.47127	6.22483e-31	postive
ALG10	LINC02595	0.471782	5.26983e-31	postive
SLC4A7	LINC02595	0.67643	8.1733e-73	postive
SLC5A3	LINC02595	0.774938	2.78319e-108	postive
SLC9A7	LINC02595	0.409248	5.09477e-23	postive
PMM2	LINC02595	0.599152	1.95068e-53	postive
ABCA9	AC092127.2	0.605823	6.68122e-55	postive
SCLY	AC092127.2	0.729898	4.06449e-90	postive
ALG10	AC092127.2	0.600649	9.21051e-54	postive
FLVCR1	AC092127.2	0.480299	3.16695e-32	postive
SLC4A7	AC092127.2	0.733354	2.226e-91	postive
SLC5A3	AC092127.2	0.622931	8.01299e-59	postive
PMM2	AC092127.2	0.646309	1.36562e-64	postive
SCLY	LINC01138	0.492966	4.16616e-34	postive
ALG10	LINC01138	0.444162	2.84416e-27	postive
ABCA9	THRB-IT1	0.725963	1.05128e-88	postive
SCLY	THRB-IT1	0.52998	4.46443e-40	postive
ALG10	THRB-IT1	0.462652	9.84876e-30	postive
SLC41A2	THRB-IT1	0.428624	2.55941e-25	postive
SLC4A7	THRB-IT1	0.667134	3.57403e-70	postive
SLC5A3	THRB-IT1	0.454625	1.20233e-28	postive
PMM2	THRB-IT1	0.575944	1.34658e-48	postive
FMO2	AL109741.1	0.402113	3.2851e-22	postive
ADH1B	AL109741.1	0.435229	3.88855e-26	postive
ADCY4	AL109741.1	0.413986	1.44111e-23	postive
INMT	AL109741.1	0.447157	1.16302e-27	postive
ABCA8	VIPR1-AS1	0.405157	1.49157e-22	postive
ABCA9	VIPR1-AS1	0.619338	5.58826e-58	postive
SCLY	VIPR1-AS1	0.438324	1.58519e-26	postive
SLC41A2	VIPR1-AS1	0.402434	3.02381e-22	postive
SLC4A7	VIPR1-AS1	0.498588	5.74763e-35	postive
SLC5A3	VIPR1-AS1	0.687174	5.4549e-76	postive
PMM2	VIPR1-AS1	0.495061	2.00018e-34	postive
ALG10	LINC01208	0.444919	2.27035e-27	postive
SLC35A2	AC012103.1	0.429847	1.81121e-25	postive
ABCA9	AC087289.1	0.445678	1.8106e-27	postive
SCLY	AC087289.1	0.549384	1.63493e-43	postive
ALG10	AC087289.1	0.451421	3.20516e-28	postive
B3GNTL1	AC087289.1	0.491849	6.14886e-34	postive
SLC4A7	AC087289.1	0.44194	5.48974e-27	postive
SLC5A3	AC087289.1	0.418625	4.10308e-24	postive
PMM2	AC087289.1	0.459785	2.42545e-29	postive
B3GNTL1	AC007879.3	0.42437	8.42869e-25	postive
ACADL	AC026992.1	0.40209	3.30507e-22	postive
ABCA9	AP001893.1	0.602798	3.11575e-54	postive
SCLY	AP001893.1	0.749405	1.65752e-97	postive
ALG10	AP001893.1	0.487456	2.80297e-33	postive
FLVCR1	AP001893.1	0.508847	1.40533e-36	postive
SLC4A7	AP001893.1	0.655584	5.05632e-67	postive
SLC5A3	AP001893.1	0.585988	1.21004e-50	postive
PMM2	AP001893.1	0.554822	1.62034e-44	postive
ABCA8	TCEAL3-AS1	0.418252	4.54235e-24	postive
ABCA9	TCEAL3-AS1	0.810929	3.80613e-126	postive
SCLY	TCEAL3-AS1	0.587384	6.20531e-51	postive
ALG10	TCEAL3-AS1	0.553412	2.96237e-44	postive
SLC4A7	TCEAL3-AS1	0.720193	1.1203e-86	postive
SLC5A3	TCEAL3-AS1	0.651085	7.83328e-66	postive
PMM2	TCEAL3-AS1	0.623715	5.22658e-59	postive
ABCA8	AC007637.1	0.463669	7.1401e-30	postive
ABCA9	AC007637.1	0.60231	3.98882e-54	postive
SCLY	AC007637.1	0.436615	2.60447e-26	postive
ACACB	AC007637.1	0.634724	1.13799e-61	postive
ALG10	AC007637.1	0.420645	2.36021e-24	postive
SLC41A2	AC007637.1	0.406845	9.59114e-23	postive
SLC4A7	AC007637.1	0.483965	9.21203e-33	postive
SLC5A3	AC007637.1	0.485169	6.12135e-33	postive
PMM2	AC007637.1	0.48333	1.14212e-32	postive
SULT1C2	AC007637.1	0.436367	2.79872e-26	postive
ABCA8	AL513128.1	0.416475	7.36293e-24	postive
ABCA9	AL513128.1	0.685026	2.41295e-75	postive
SCLY	AL513128.1	0.410363	3.79101e-23	postive
SLC4A7	AL513128.1	0.440605	8.13243e-27	postive
XDH	AC003092.1	0.54141	4.49563e-42	postive
ABCA8	SPIN4-AS1	0.422659	1.3547e-24	postive
ABCA9	SPIN4-AS1	0.845244	3.59399e-147	postive
SCLY	SPIN4-AS1	0.548099	2.80514e-43	postive
ALG10	SPIN4-AS1	0.509912	9.48962e-37	postive
SLC4A7	SPIN4-AS1	0.704703	1.77026e-81	postive
SLC5A3	SPIN4-AS1	0.573419	4.29223e-48	postive
PMM2	SPIN4-AS1	0.601375	6.39249e-54	postive
ABCA9	AC010226.1	0.746185	3.0604e-96	postive
SCLY	AC010226.1	0.55476	1.66361e-44	postive
ALG10	AC010226.1	0.470541	7.88782e-31	postive
SLC4A7	AC010226.1	0.676035	1.06358e-72	postive
SLC5A3	AC010226.1	0.615726	3.84231e-57	postive
PMM2	AC010226.1	0.542551	2.81308e-42	postive
SCNN1D	AL021392.1	0.565619	1.44733e-46	postive
ABCA9	RNF139-AS1	0.496569	1.17564e-34	postive
SCLY	RNF139-AS1	0.664928	1.4649e-69	postive
ALG10	RNF139-AS1	0.50038	3.03286e-35	postive
SLC4A7	RNF139-AS1	0.570898	1.3522e-47	postive
SLC5A3	RNF139-AS1	0.479559	4.05565e-32	postive
PMM2	RNF139-AS1	0.488917	1.69617e-33	postive
ABCA9	AC012615.4	0.463592	7.31599e-30	postive
SCLY	AC012615.4	0.584643	2.2965e-50	postive
ALG10	AC012615.4	0.411643	2.69756e-23	postive
SLC4A7	AC012615.4	0.532703	1.517e-40	postive
SLC5A3	AC012615.4	0.433364	6.64711e-26	postive
PMM2	AC012615.4	0.505481	4.81381e-36	postive
ABCA9	AC138393.2	0.623704	5.25836e-59	postive
SCLY	AC138393.2	0.735632	3.19879e-92	postive
ALG10	AC138393.2	0.624735	2.99302e-59	postive
FLVCR1	AC138393.2	0.495873	1.50271e-34	postive
SLC4A7	AC138393.2	0.823134	4.2468e-133	postive
SLC5A3	AC138393.2	0.645924	1.71574e-64	postive
PMM2	AC138393.2	0.694761	2.56846e-78	postive
AKR7A3	AC083809.1	0.410297	3.85809e-23	postive
GOT1	AC083809.1	0.627892	5.25632e-60	postive
SCLY	AC083900.1	0.538695	1.36154e-41	postive
SLC4A7	AC083900.1	0.436585	2.62712e-26	postive
ABCA9	AC092953.2	0.565515	1.51552e-46	postive
SCLY	AC092953.2	0.450681	4.0133e-28	postive
ALG10	AC092953.2	0.444261	2.76182e-27	postive
SLC41A2	AC092953.2	0.423369	1.11292e-24	postive
SLC4A7	AC092953.2	0.521492	1.21412e-38	postive
SLC5A3	AC092953.2	0.431785	1.04414e-25	postive
PMM2	AC092953.2	0.450735	3.94873e-28	postive
ABCA9	LDLRAD4-AS1	0.705742	8.12568e-82	postive
SCLY	LDLRAD4-AS1	0.517293	6.01399e-38	postive
ALG10	LDLRAD4-AS1	0.571354	1.09964e-47	postive
SLC4A7	LDLRAD4-AS1	0.7768	4.00971e-109	postive
SLC5A3	LDLRAD4-AS1	0.582954	5.10986e-50	postive
PMM2	LDLRAD4-AS1	0.659917	3.45259e-68	postive
ABCA9	MANEA-DT	0.815454	1.15577e-128	postive
SCLY	MANEA-DT	0.678574	1.94851e-73	postive
ALG10	MANEA-DT	0.595879	9.919e-53	postive
SLC4A7	MANEA-DT	0.746282	2.8055e-96	postive
SLC5A3	MANEA-DT	0.616616	2.39406e-57	postive
PMM2	MANEA-DT	0.623937	4.63117e-59	postive
ABCA9	ARHGAP15-AS1	0.760397	5.57907e-102	postive
SCLY	ARHGAP15-AS1	0.617853	1.23828e-57	postive
ALG10	ARHGAP15-AS1	0.609641	9.34132e-56	postive
SLC4A7	ARHGAP15-AS1	0.780479	8.26074e-111	postive
SLC5A3	ARHGAP15-AS1	0.645785	1.86259e-64	postive
PMM2	ARHGAP15-AS1	0.696173	9.30029e-79	postive
ABCA9	AC108010.1	0.728448	1.35702e-89	postive
SCLY	AC108010.1	0.662757	5.80387e-69	postive
ALG10	AC108010.1	0.552679	4.04917e-44	postive
SLC4A7	AC108010.1	0.71459	9.32671e-85	postive
SLC5A3	AC108010.1	0.615878	3.54438e-57	postive
SLC9A7	AC108010.1	0.435278	3.83314e-26	postive
PMM2	AC108010.1	0.62693	8.94782e-60	postive
ABCA9	LACTB2-AS1	0.521981	1.00628e-38	postive
SCLY	LACTB2-AS1	0.537475	2.23298e-41	postive
ALG10	LACTB2-AS1	0.59262	4.91839e-52	postive
SLC4A7	LACTB2-AS1	0.726602	6.22531e-89	postive
SLC5A3	LACTB2-AS1	0.58977	1.96611e-51	postive
PMM2	LACTB2-AS1	0.608349	1.82331e-55	postive
ABCA9	AC133550.3	0.639686	6.61281e-63	postive
SCLY	AC133550.3	0.588223	4.14633e-51	postive
ACACB	AC133550.3	0.414804	1.15625e-23	postive
SLC4A7	AC133550.3	0.529599	5.1896e-40	postive
SLC5A3	AC133550.3	0.48047	2.99064e-32	postive
PMM2	AC133550.3	0.4774	8.32079e-32	postive
ABCA9	AC025434.1	0.610139	7.21351e-56	postive
SCLY	AC025434.1	0.57199	8.23672e-48	postive
ALG10	AC025434.1	0.518071	4.47812e-38	postive
SLC4A7	AC025434.1	0.747779	7.26439e-97	postive
SLC5A3	AC025434.1	0.614494	7.36935e-57	postive
SLCO1B3	AC025434.1	0.407855	7.35542e-23	postive
PMM2	AC025434.1	0.580014	2.03505e-49	postive
SCLY	AL645608.2	0.413411	1.68158e-23	postive
ABCA9	ETV5-AS1	0.746907	1.59802e-96	postive
SCLY	ETV5-AS1	0.680465	5.44224e-74	postive
ALG10	ETV5-AS1	0.549525	1.54046e-43	postive
SLC4A7	ETV5-AS1	0.69793	2.6055e-79	postive
SLC5A3	ETV5-AS1	0.586965	7.58431e-51	postive
PMM2	ETV5-AS1	0.604506	1.30877e-54	postive
ABCA9	MTOR-AS1	0.726551	6.49121e-89	postive
SCLY	MTOR-AS1	0.65011	1.40967e-65	postive
ALG10	MTOR-AS1	0.626178	1.35509e-59	postive
SLC4A7	MTOR-AS1	0.838062	2.28006e-142	postive
SLC5A3	MTOR-AS1	0.689918	8.00633e-77	postive
PMM2	MTOR-AS1	0.712531	4.6111e-84	postive
ABCA9	AC079866.2	0.627071	8.28097e-60	postive
SCLY	AC079866.2	0.537237	2.45891e-41	postive
ALG10	AC079866.2	0.530646	3.43208e-40	postive
SLC41A2	AC079866.2	0.495703	1.59562e-34	postive
SLC4A7	AC079866.2	0.71327	2.60228e-84	postive
SLC5A3	AC079866.2	0.644541	3.8836e-64	postive
PMM2	AC079866.2	0.659744	3.84668e-68	postive
SCLY	ARNTL2-AS1	0.423015	1.22759e-24	postive
AQP9	ARNTL2-AS1	0.41506	1.07927e-23	postive
SLC4A7	ARNTL2-AS1	0.468632	1.46168e-30	postive
PMM2	ARNTL2-AS1	0.483673	1.01685e-32	postive
SLC16A11	AL137802.2	0.560583	1.33556e-45	postive
ABCA9	DOCK8-AS1	0.417963	4.9143e-24	postive
SLC4A7	DOCK8-AS1	0.505695	4.45349e-36	postive
ABCA8	LRRC8C-DT	0.413748	1.5359e-23	postive
ABCA9	LRRC8C-DT	0.765649	3.33664e-104	postive
SCLY	LRRC8C-DT	0.623964	4.56125e-59	postive
ALG10	LRRC8C-DT	0.55578	1.07357e-44	postive
SLC4A7	LRRC8C-DT	0.772195	4.66602e-107	postive
SLC5A3	LRRC8C-DT	0.637935	1.81592e-62	postive
PMM2	LRRC8C-DT	0.557672	4.7421e-45	postive
ABCA9	LINC01534	0.606449	4.84839e-55	postive
SCLY	LINC01534	0.593379	3.39392e-52	postive
ALG10	LINC01534	0.459465	2.68113e-29	postive
SLC4A7	LINC01534	0.669414	8.20684e-71	postive
SLC5A3	LINC01534	0.512841	3.20076e-37	postive
PMM2	LINC01534	0.487604	2.66432e-33	postive
HMBS	GSEC	0.407547	7.97674e-23	postive
UCK2	GSEC	0.44936	5.98905e-28	postive
SCLY	AC006213.3	0.422694	1.34155e-24	postive
ALG10	AC006213.3	0.426329	4.87845e-25	postive
SLC4A7	AC006213.3	0.427185	3.83768e-25	postive
ABCA9	SCAANT1	0.525959	2.15986e-39	postive
SCLY	SCAANT1	0.580783	1.41982e-49	postive
ALG10	SCAANT1	0.559836	1.85041e-45	postive
SLC4A7	SCAANT1	0.560969	1.12778e-45	postive
SLC5A3	SCAANT1	0.551716	6.09903e-44	postive
PMM2	SCAANT1	0.520564	1.73281e-38	postive
ABCA9	LMO7DN	0.44666	1.34954e-27	postive
ABCA9	NADK2-AS1	0.722721	1.46994e-87	postive
SCLY	NADK2-AS1	0.59174	7.55559e-52	postive
ALG10	NADK2-AS1	0.588065	4.47364e-51	postive
SLC4A7	NADK2-AS1	0.774534	4.22393e-108	postive
SLC5A3	NADK2-AS1	0.717003	1.40774e-85	postive
PMM2	NADK2-AS1	0.6903	6.11833e-77	postive
ABCA9	AC007569.1	0.446914	1.25085e-27	postive
SCLY	AC007569.1	0.410385	3.76929e-23	postive
ALG10	AC007569.1	0.418246	4.55039e-24	postive
SLC4A7	AC007569.1	0.48749	2.77015e-33	postive
SLC5A3	AC007569.1	0.465036	4.62501e-30	postive
PMM2	AC007569.1	0.422879	1.27472e-24	postive
ABCA9	AC012447.1	0.639017	9.73874e-63	postive
SCLY	AC012447.1	0.650811	9.24278e-66	postive
ALG10	AC012447.1	0.653222	2.14388e-66	postive
FLVCR1	AC012447.1	0.418295	4.49013e-24	postive
SLC4A7	AC012447.1	0.819528	5.45309e-131	postive
SLC5A3	AC012447.1	0.663679	3.23899e-69	postive
PMM2	AC012447.1	0.677475	4.06812e-73	postive
ABCA9	AC024084.1	0.593457	3.26591e-52	postive
SCLY	AC024084.1	0.415378	9.90496e-24	postive
ALG10	AC024084.1	0.414909	1.1241e-23	postive
SLC4A7	AC024084.1	0.630232	1.42998e-60	postive
PMM2	AC024084.1	0.466985	2.48161e-30	postive
SCLY	POLH-AS1	0.408334	6.48355e-23	postive
PMM2	AC090541.1	0.432958	7.46667e-26	postive
ABCA8	SGMS1-AS1	0.433474	6.44052e-26	postive
ABCA8	LINC01140	0.595404	1.25443e-52	postive
ABCA9	LINC01140	0.569561	2.47413e-47	postive
FMO2	LINC01140	0.489334	1.46919e-33	postive
ACACB	LINC01140	0.40524	1.45949e-22	postive
ADH1B	LINC01140	0.61177	3.08354e-56	postive
ABCA9	AL442128.2	0.745171	7.59604e-96	postive
SCLY	AL442128.2	0.665962	7.57287e-70	postive
ALG10	AL442128.2	0.482547	1.48804e-32	postive
SLC4A7	AL442128.2	0.658001	1.13752e-67	postive
SLC5A3	AL442128.2	0.427325	3.68911e-25	postive
PMM2	AL442128.2	0.486643	3.70254e-33	postive
ABCA9	AC021739.2	0.688537	2.10794e-76	postive
SCLY	AC021739.2	0.603584	2.09115e-54	postive
ALG10	AC021739.2	0.484309	8.19861e-33	postive
SLC41A2	AC021739.2	0.453458	1.7209e-28	postive
SLC4A7	AC021739.2	0.699588	7.77938e-80	postive
SLC5A3	AC021739.2	0.649205	2.42809e-65	postive
PMM2	AC021739.2	0.63085	1.01183e-60	postive
ABCB6	AC092115.3	0.50707	2.69652e-36	postive
GSR	AC092115.3	0.413453	1.66251e-23	postive
NQO1	AC092115.3	0.542603	2.75364e-42	postive
G6PD	AC092115.3	0.421797	1.71884e-24	postive
ABCA9	AC020661.3	0.743473	3.4475e-95	postive
SCLY	AC020661.3	0.64899	2.76221e-65	postive
ALG10	AC020661.3	0.619954	4.01449e-58	postive
SLC4A7	AC020661.3	0.79745	4.93031e-119	postive
SLC5A3	AC020661.3	0.605841	6.61841e-55	postive
PMM2	AC020661.3	0.676728	6.70211e-73	postive
SCLY	IBA57-DT	0.470456	8.10895e-31	postive
ABCA8	AC018647.1	0.652028	4.42779e-66	postive
ABCA9	AC018647.1	0.561771	7.93347e-46	postive
FMO2	AC018647.1	0.58301	4.97849e-50	postive
ACACB	AC018647.1	0.467375	2.18966e-30	postive
ACADL	AC018647.1	0.484525	7.61723e-33	postive
ADH1B	AC018647.1	0.62974	1.88201e-60	postive
ADCY4	AC018647.1	0.406562	1.03309e-22	postive
INMT	AC018647.1	0.554128	2.18083e-44	postive
ABCA9	Z97192.3	0.780868	5.45575e-111	postive
SCLY	Z97192.3	0.594102	2.38011e-52	postive
ALG10	Z97192.3	0.507151	2.61795e-36	postive
SLC4A7	Z97192.3	0.730267	2.987e-90	postive
SLC5A3	Z97192.3	0.561293	9.78669e-46	postive
PMM2	Z97192.3	0.61265	1.94466e-56	postive
ABCA9	AC090337.1	0.717583	8.90644e-86	postive
SCLY	AC090337.1	0.59989	1.34828e-53	postive
ALG10	AC090337.1	0.613858	1.03089e-56	postive
SLC4A7	AC090337.1	0.81768	6.29666e-130	postive
SLC5A3	AC090337.1	0.658764	7.08582e-68	postive
PMM2	AC090337.1	0.681267	3.15854e-74	postive
OGDHL	LINC02106	0.564401	2.48589e-46	postive
TYMS	LINC02106	0.404608	1.72091e-22	postive
PDE2A	LINC02106	0.652213	3.95861e-66	postive
ALG10	SOCAR	0.450234	4.59711e-28	postive
SLC4A7	SOCAR	0.497986	7.11843e-35	postive
PMM2	SOCAR	0.420877	2.21425e-24	postive
ABCA9	AC023590.1	0.692371	1.41437e-77	postive
SCLY	AC023590.1	0.665624	9.39583e-70	postive
ALG10	AC023590.1	0.69012	6.94499e-77	postive
SLC41A2	AC023590.1	0.400192	5.38489e-22	postive
SLC4A7	AC023590.1	0.812427	5.68288e-127	postive
SLC5A3	AC023590.1	0.66288	5.36984e-69	postive
PMM2	AC023590.1	0.69028	6.20513e-77	postive
SCLY	AL157823.2	0.522419	8.50536e-39	postive
SLC4A7	AL157823.2	0.431197	1.23427e-25	postive
SLC5A3	AL157823.2	0.402057	3.33321e-22	postive
OGDHL	AL161719.1	0.453593	1.65091e-28	postive
PDE2A	AL161719.1	0.403837	2.10283e-22	postive
ABCA9	AC078846.1	0.566416	1.01452e-46	postive
SCLY	AC078846.1	0.767721	4.26726e-105	postive
ALG10	AC078846.1	0.612011	2.71714e-56	postive
FLVCR1	AC078846.1	0.490773	8.93495e-34	postive
SLC4A7	AC078846.1	0.668964	1.09871e-70	postive
SLC5A3	AC078846.1	0.58375	3.50755e-50	postive
PMM2	AC078846.1	0.593143	3.80888e-52	postive
ABCA9	CCND2-AS1	0.558097	3.94478e-45	postive
ABCA9	ZNF451-AS1	0.710271	2.62365e-83	postive
SCLY	ZNF451-AS1	0.660896	1.87091e-68	postive
ALG10	ZNF451-AS1	0.616371	2.72742e-57	postive
SLC4A7	ZNF451-AS1	0.84783	5.83548e-149	postive
SLC5A3	ZNF451-AS1	0.667248	3.32171e-70	postive
PMM2	ZNF451-AS1	0.699344	9.30029e-80	postive
ABCA9	AL137779.2	0.642875	1.03325e-63	postive
SCLY	AL137779.2	0.563256	4.12603e-46	postive
ALG10	AL137779.2	0.573122	4.91687e-48	postive
SLC4A7	AL137779.2	0.733899	1.4016e-91	postive
SLC5A3	AL137779.2	0.666242	6.32957e-70	postive
SLCO1B3	AL137779.2	0.464572	5.36084e-30	postive
PMM2	AL137779.2	0.61956	4.96025e-58	postive
ABCA9	LINC00513	0.64716	8.23883e-65	postive
SCLY	LINC00513	0.592994	4.09842e-52	postive
ALG10	LINC00513	0.564609	2.26717e-46	postive
SLC4A7	LINC00513	0.717846	7.23583e-86	postive
SLC5A3	LINC00513	0.652813	2.74891e-66	postive
PMM2	LINC00513	0.6345	1.29189e-61	postive
SLC16A11	LINC01374	0.72134	4.469e-87	postive
CYP27A1	AC004921.1	0.454624	1.20277e-28	postive
SLCO2B1	AC004921.1	0.475772	1.42572e-31	postive
KMO	AC004921.1	0.517171	6.29642e-38	postive
ABCA9	VAC14-AS1	0.605697	7.12335e-55	postive
SCLY	VAC14-AS1	0.600149	1.18359e-53	postive
ALG10	VAC14-AS1	0.499181	4.65243e-35	postive
SLC4A7	VAC14-AS1	0.676117	1.00689e-72	postive
SLC5A3	VAC14-AS1	0.51002	9.11733e-37	postive
PMM2	VAC14-AS1	0.544487	1.26443e-42	postive
ABCA9	AC009228.1	0.547138	4.19542e-43	postive
SCLY	AC009228.1	0.434821	4.37377e-26	postive
ALG10	AC009228.1	0.451349	3.27647e-28	postive
SLC4A7	AC009228.1	0.509089	1.28527e-36	postive
SLC5A3	AC009228.1	0.433167	7.03301e-26	postive
PMM2	AC009228.1	0.467956	1.81687e-30	postive
ALDOA	MIR210HG	0.437172	2.21564e-26	postive
ABCA9	LINC00893	0.529139	6.21894e-40	postive
SCLY	LINC00893	0.457033	5.71595e-29	postive
ACACB	LINC00893	0.439249	1.21006e-26	postive
B3GNTL1	LINC00893	0.469176	1.22673e-30	postive
SCNN1D	LINC00893	0.466692	2.72541e-30	postive
ABCA9	MAL2-AS1	0.633601	2.15109e-61	postive
SCLY	MAL2-AS1	0.614523	7.25937e-57	postive
GFPT1	MAL2-AS1	0.402648	2.86151e-22	postive
ALG10	MAL2-AS1	0.594702	1.7726e-52	postive
SLC41A2	MAL2-AS1	0.470667	7.57165e-31	postive
SLC4A7	MAL2-AS1	0.739937	7.7441e-94	postive
SLC5A3	MAL2-AS1	0.657714	1.35893e-67	postive
PMM2	MAL2-AS1	0.707918	1.57448e-82	postive
ABCA9	AP001628.1	0.741908	1.37596e-94	postive
SCLY	AP001628.1	0.66836	1.6233e-70	postive
ALG10	AP001628.1	0.429738	1.8676e-25	postive
SLC4A7	AP001628.1	0.597109	5.39425e-53	postive
SLC5A3	AP001628.1	0.438657	1.43814e-26	postive
PMM2	AP001628.1	0.478968	4.93995e-32	postive
ABCA9	CASK-AS1	0.612458	2.15034e-56	postive
SCLY	CASK-AS1	0.624557	3.29981e-59	postive
ALG10	CASK-AS1	0.447469	1.0589e-27	postive
SLC4A7	CASK-AS1	0.644978	3.00257e-64	postive
SLC5A3	CASK-AS1	0.549979	1.27195e-43	postive
SLC9A7	CASK-AS1	0.412581	2.09994e-23	postive
PMM2	CASK-AS1	0.588025	4.56061e-51	postive
ABCA9	AC119424.1	0.472617	4.01464e-31	postive
SLC5A3	AC119424.1	0.453047	1.95118e-28	postive
FMO2	AC018755.4	0.401937	3.43814e-22	postive
SCNN1D	AC025048.2	0.412034	2.43044e-23	postive
SCLY	AL359644.1	0.424305	8.58136e-25	postive
SLC4A7	AL359644.1	0.409524	4.7361e-23	postive
SCLY	LINC01424	0.672382	1.1866e-71	postive
FLVCR1	LINC01424	0.410443	3.71132e-23	postive
SLC4A7	LINC01424	0.502745	1.29705e-35	postive
SLC5A3	LINC01424	0.418944	3.76126e-24	postive
ABCA9	AL607028.1	0.583832	3.37409e-50	postive
SCLY	AL607028.1	0.490463	9.94484e-34	postive
ALG10	AL607028.1	0.421331	1.9541e-24	postive
SLC41A2	AL607028.1	0.427251	3.76713e-25	postive
SLC4A7	AL607028.1	0.612368	2.25427e-56	postive
SLC5A3	AL607028.1	0.466548	2.85394e-30	postive
PMM2	AL607028.1	0.544286	1.37407e-42	postive
SULT1C2	AL607028.1	0.403303	2.41499e-22	postive
ALG10	AC117386.1	0.533364	1.16564e-40	postive
ABCA9	DOCK4-AS1	0.775297	1.9185e-108	postive
SCLY	DOCK4-AS1	0.623425	6.12131e-59	postive
ALG10	DOCK4-AS1	0.615627	4.04858e-57	postive
SLC4A7	DOCK4-AS1	0.816358	3.56155e-129	postive
SLC5A3	DOCK4-AS1	0.62997	1.65512e-60	postive
PMM2	DOCK4-AS1	0.683123	8.91457e-75	postive
ABCA9	LINC00852	0.736295	1.81202e-92	postive
SCLY	LINC00852	0.629806	1.81381e-60	postive
ALG10	LINC00852	0.509015	1.32101e-36	postive
SLC4A7	LINC00852	0.720661	7.70676e-87	postive
SLC5A3	LINC00852	0.606672	4.32351e-55	postive
PMM2	LINC00852	0.54449	1.26288e-42	postive
ABCA9	ZNF460-AS1	0.593553	3.11626e-52	postive
SCLY	ZNF460-AS1	0.574761	2.32124e-48	postive
ALG10	ZNF460-AS1	0.422837	1.28973e-24	postive
SLC4A7	ZNF460-AS1	0.568461	4.06006e-47	postive
SLC5A3	ZNF460-AS1	0.49474	2.2387e-34	postive
PMM2	ZNF460-AS1	0.437673	1.91586e-26	postive
ALG8	KCTD21-AS1	0.504112	7.91368e-36	postive
ABCA8	AC010680.5	0.409084	5.32004e-23	postive
ABCA9	AC010680.5	0.73968	9.68998e-94	postive
SCLY	AC010680.5	0.622924	8.04378e-59	postive
ALG10	AC010680.5	0.430043	1.713e-25	postive
SLC4A7	AC010680.5	0.599192	1.91164e-53	postive
SLC5A3	AC010680.5	0.454634	1.19925e-28	postive
PMM2	AC010680.5	0.486675	3.66241e-33	postive
ABCA9	AC025165.5	0.420083	2.75403e-24	postive
SCLY	AC025165.5	0.409878	4.31231e-23	postive
SLC4A7	AC025165.5	0.465434	4.07338e-30	postive
ABCA9	AL133410.1	0.476268	1.21034e-31	postive
SCLY	AL133410.1	0.491449	7.06649e-34	postive
ABCA8	LINC01091	0.45597	7.94382e-29	postive
ABCA9	LINC01091	0.71076	1.80388e-83	postive
SCLY	LINC01091	0.401313	4.03803e-22	postive
SLC4A7	LINC01091	0.464569	5.36492e-30	postive
SCLY	LINC02293	0.43111	1.26516e-25	postive
FLVCR1	LINC02293	0.433491	6.40869e-26	postive
ABCA8	AC009163.4	0.406083	1.17105e-22	postive
ABCA9	AC009163.4	0.813965	7.92753e-128	postive
SCLY	AC009163.4	0.569988	2.04071e-47	postive
ALG10	AC009163.4	0.516558	7.93923e-38	postive
SLC4A7	AC009163.4	0.621036	2.23858e-58	postive
SLC5A3	AC009163.4	0.536928	2.78552e-41	postive
PMM2	AC009163.4	0.578406	4.30743e-49	postive
ABCA9	AL159169.3	0.514857	1.50574e-37	postive
SCLY	AL159169.3	0.503586	9.57471e-36	postive
ALG10	AL159169.3	0.590426	1.4308e-51	postive
SLC4A7	AL159169.3	0.568894	3.34218e-47	postive
SLC5A3	AL159169.3	0.556856	6.7496e-45	postive
SLCO1B3	AL159169.3	0.486863	3.43331e-33	postive
PMM2	AL159169.3	0.485843	4.86562e-33	postive
ABCA9	EGFR-AS1	0.693521	6.23604e-78	postive
SCLY	EGFR-AS1	0.608367	1.8068e-55	postive
ALG10	EGFR-AS1	0.534843	6.44993e-41	postive
SLC4A7	EGFR-AS1	0.684156	4.39323e-75	postive
SLC5A3	EGFR-AS1	0.785268	4.70302e-113	postive
PMM2	EGFR-AS1	0.633196	2.70437e-61	postive
B3GNTL1	SNHG12	0.483194	1.19576e-32	postive
SCNN1D	SNHG12	0.525028	3.10231e-39	postive
NAT9	SNHG12	0.435738	3.35639e-26	postive
SLC4A7	ZFPM2-AS1	0.41639	7.53319e-24	postive
PMM2	ZFPM2-AS1	0.41001	4.1632e-23	postive
NDUFS6	AC083880.1	0.414184	1.36646e-23	postive
CLCN2	AC083880.1	0.410699	3.46743e-23	postive
NUDT1	AC083880.1	0.429971	1.74841e-25	postive
DTYMK	AC083880.1	0.430855	1.36038e-25	postive
SLC25A39	AC083880.1	0.50383	8.76553e-36	postive
B3GNTL1	MATN1-AS1	0.47149	5.79579e-31	postive
SCNN1D	MATN1-AS1	0.583411	4.11847e-50	postive
ABCA9	AC079684.1	0.547653	3.38292e-43	postive
SCLY	AC079684.1	0.716529	2.04389e-85	postive
ALG10	AC079684.1	0.588869	3.03823e-51	postive
FLVCR1	AC079684.1	0.431206	1.23117e-25	postive
SLC4A7	AC079684.1	0.709536	4.5987e-83	postive
SLC5A3	AC079684.1	0.5507	9.37955e-44	postive
PMM2	AC079684.1	0.582541	6.21152e-50	postive
ABCA9	AC006116.5	0.777432	2.06883e-109	postive
SCLY	AC006116.5	0.642109	1.61741e-63	postive
ALG10	AC006116.5	0.550574	9.89331e-44	postive
SLC4A7	AC006116.5	0.744917	9.53655e-96	postive
SLC5A3	AC006116.5	0.57661	9.90353e-49	postive
PMM2	AC006116.5	0.62454	3.32987e-59	postive
SCLY	AL139420.1	0.51337	2.62809e-37	postive
ALG10	AL139420.1	0.40129	4.06178e-22	postive
FLVCR1	AL139420.1	0.432829	7.7474e-26	postive
SCLY	LINC01535	0.495631	1.6366e-34	postive
ALG10	LINC01535	0.558062	4.00479e-45	postive
SLC4A7	LINC01535	0.565294	1.67242e-46	postive
SLC5A3	LINC01535	0.426579	4.5488e-25	postive
SLCO1B3	LINC01535	0.424756	7.56905e-25	postive
PMM2	LINC01535	0.458479	3.6464e-29	postive
SLC16A11	AC109446.2	0.779759	1.77614e-110	postive
ABCA9	AC009318.1	0.626321	1.252e-59	postive
SCLY	AC009318.1	0.448782	7.1305e-28	postive
ALG10	AC009318.1	0.709797	3.76992e-83	postive
SLC4A7	AC009318.1	0.551089	7.95681e-44	postive
SLC5A3	AC009318.1	0.453691	1.60225e-28	postive
PMM2	AC009318.1	0.449821	5.20949e-28	postive
SCNN1D	HYI-AS1	0.543451	1.94081e-42	postive
ABCA9	SAP30L-AS1	0.77736	2.23219e-109	postive
SCLY	SAP30L-AS1	0.582503	6.32223e-50	postive
ALG10	SAP30L-AS1	0.565684	1.40599e-46	postive
SLC4A7	SAP30L-AS1	0.762193	9.83781e-103	postive
SLC5A3	SAP30L-AS1	0.573579	3.98876e-48	postive
PMM2	SAP30L-AS1	0.60459	1.25406e-54	postive
ALG10	CASC15	0.468292	1.63087e-30	postive
ABCA9	MIR4453HG	0.496267	1.30786e-34	postive
SCLY	MIR4453HG	0.567001	7.81244e-47	postive
SLC38A3	MIR4453HG	0.415312	1.00824e-23	postive
SLC4A7	MIR4453HG	0.503362	1.03815e-35	postive
PMM2	MIR4453HG	0.404834	1.62246e-22	postive
ABCA9	AL158163.2	0.797973	2.6733e-119	postive
SCLY	AL158163.2	0.628112	4.65322e-60	postive
ALG10	AL158163.2	0.616818	2.15035e-57	postive
SLC41A2	AL158163.2	0.402375	3.07049e-22	postive
SLC4A7	AL158163.2	0.783325	3.88916e-112	postive
SLC5A3	AL158163.2	0.644324	4.41303e-64	postive
PMM2	AL158163.2	0.665557	9.81021e-70	postive
ABCA9	TRG-AS1	0.425494	6.16069e-25	postive
SLCO2B1	TRG-AS1	0.440365	8.72597e-27	postive
KMO	TRG-AS1	0.420888	2.20782e-24	postive
SCLY	AC021491.2	0.551655	6.25723e-44	postive
SCNN1D	AC021491.2	0.406221	1.12958e-22	postive
ABCA9	AC008115.4	0.443854	3.11605e-27	postive
ABCA8	AC027348.1	0.461173	1.56947e-29	postive
ABCA9	AC027348.1	0.662653	6.19566e-69	postive
SCLY	AC027348.1	0.410119	4.04545e-23	postive
ACACB	AC027348.1	0.468025	1.77721e-30	postive
SLC4A7	AC027348.1	0.406178	1.14235e-22	postive
ABCA9	AC133106.1	0.56601	1.21622e-46	postive
SCLY	AC133106.1	0.504163	7.76824e-36	postive
ALG10	AC133106.1	0.495593	1.6587e-34	postive
SLC4A7	AC133106.1	0.766312	1.73237e-104	postive
SLC5A3	AC133106.1	0.500743	2.66321e-35	postive
PMM2	AC133106.1	0.581821	8.721e-50	postive
ABCA9	AC004884.2	0.54053	6.44638e-42	postive
SCLY	AC004884.2	0.713717	1.83993e-84	postive
ALG10	AC004884.2	0.616909	2.04891e-57	postive
FLVCR1	AC004884.2	0.490618	9.42637e-34	postive
SLC4A7	AC004884.2	0.759473	1.35469e-101	postive
SLC5A3	AC004884.2	0.595858	1.00254e-52	postive
PMM2	AC004884.2	0.632896	3.20308e-61	postive
SCLY	AL359232.1	0.407668	7.72803e-23	postive
SLC4A7	AL359232.1	0.44622	1.53991e-27	postive
SLC5A3	AL359232.1	0.483296	1.15517e-32	postive
SLCO1B3	AL359232.1	0.411735	2.63198e-23	postive
ABCA9	AC245060.6	0.590765	1.21418e-51	postive
SCLY	AC245060.6	0.662375	7.38401e-69	postive
ACACB	AC245060.6	0.424165	8.92126e-25	postive
SLC4A7	AC245060.6	0.531169	2.79019e-40	postive
SLC5A3	AC245060.6	0.453786	1.55583e-28	postive
PMM2	AC245060.6	0.415587	9.36179e-24	postive
ABCA9	INTS6-AS1	0.532185	1.86421e-40	postive
SCLY	INTS6-AS1	0.512576	3.53338e-37	postive
B3GNTL1	INTS6-AS1	0.446585	1.3804e-27	postive
SLC4A7	INTS6-AS1	0.429704	1.88572e-25	postive
SLC5A3	INTS6-AS1	0.403747	2.15214e-22	postive
ABCA9	AC245060.5	0.615318	4.76885e-57	postive
SCLY	AC245060.5	0.574947	2.13072e-48	postive
ACACB	AC245060.5	0.420721	2.31163e-24	postive
SLC4A7	AC245060.5	0.513055	2.95532e-37	postive
SLC5A3	AC245060.5	0.427262	3.75483e-25	postive
SCNN1D	LINC01176	0.405399	1.40035e-22	postive
ABCA9	AL109947.1	0.418549	4.18986e-24	postive
ABCA9	SPTBN1-AS1	0.712466	4.84864e-84	postive
SCLY	SPTBN1-AS1	0.582435	6.52932e-50	postive
ALG10	SPTBN1-AS1	0.562937	4.74792e-46	postive
SLC4A7	SPTBN1-AS1	0.753196	5.05339e-99	postive
SLC5A3	SPTBN1-AS1	0.666113	6.87478e-70	postive
PMM2	SPTBN1-AS1	0.646234	1.42801e-64	postive
ABCA9	AC073641.1	0.450479	4.26768e-28	postive
SCLY	AC073641.1	0.615701	3.89193e-57	postive
ALG10	AC073641.1	0.402769	2.77333e-22	postive
SLC4A7	AC073641.1	0.620786	2.56229e-58	postive
SCLY	AC139100.2	0.4697	1.03563e-30	postive
B3GNTL1	AC139100.2	0.451534	3.0969e-28	postive
B3GNTL1	AC024361.3	0.545213	9.35585e-43	postive
ABCA9	MIR34AHG	0.605612	7.4418e-55	postive
SCLY	MIR34AHG	0.462037	1.19573e-29	postive
SLC4A7	MIR34AHG	0.568742	3.57873e-47	postive
SLC5A3	MIR34AHG	0.507359	2.426e-36	postive
PMM2	MIR34AHG	0.52508	3.03998e-39	postive
SRXN1	MIR193BHG	0.421489	1.87112e-24	postive
B3GNTL1	SRRM2-AS1	0.462413	1.06201e-29	postive
SCNN1D	SRRM2-AS1	0.529158	6.17322e-40	postive
ABCA9	AL031667.3	0.467202	2.31495e-30	postive
SCLY	AL031667.3	0.475329	1.6498e-31	postive
ALG10	AL031667.3	0.410536	3.6217e-23	postive
SLC4A7	AL031667.3	0.534704	6.81705e-41	postive
SLC5A3	AL031667.3	0.41606	8.237e-24	postive
PMM2	AL031667.3	0.551203	7.58234e-44	postive
ABCA9	SNHG31	0.405554	1.3447e-22	postive
ALG10	SNHG31	0.410667	3.4971e-23	postive
SLC4A7	SNHG31	0.610332	6.52538e-56	postive
SLC5A3	SNHG31	0.446187	1.55498e-27	postive
PMM2	SNHG31	0.477627	7.71736e-32	postive
ABCA9	PTPRK-AS1	0.640561	3.98441e-63	postive
SCLY	PTPRK-AS1	0.577611	6.22952e-49	postive
ALG10	PTPRK-AS1	0.537819	1.94296e-41	postive
SLC41A2	PTPRK-AS1	0.49808	6.88338e-35	postive
SLC4A7	PTPRK-AS1	0.720076	1.22959e-86	postive
SLC5A3	PTPRK-AS1	0.601355	6.45548e-54	postive
PMM2	PTPRK-AS1	0.646378	1.31137e-64	postive
FMO2	LINC02519	0.435923	3.18232e-26	postive
SCLY	AL021937.1	0.454704	1.17364e-28	postive
ABCA8	AL158163.1	0.41641	7.49344e-24	postive
ABCA9	AL158163.1	0.794858	9.98348e-118	postive
SCLY	AL158163.1	0.623658	5.39052e-59	postive
ALG10	AL158163.1	0.608661	1.55198e-55	postive
SLC4A7	AL158163.1	0.774296	5.40041e-108	postive
SLC5A3	AL158163.1	0.622641	9.38199e-59	postive
PMM2	AL158163.1	0.658169	1.0254e-67	postive
B3GNTL1	RFPL3S	0.411051	3.15831e-23	postive
ABCA9	GHRLOS	0.687215	5.30251e-76	postive
SCLY	GHRLOS	0.63041	1.29444e-60	postive
ALG10	GHRLOS	0.407301	8.50866e-23	postive
SLC4A7	GHRLOS	0.628594	3.56164e-60	postive
SLC5A3	GHRLOS	0.518377	3.98702e-38	postive
PMM2	GHRLOS	0.468258	1.64905e-30	postive
ABCA9	AC012557.2	0.784942	6.71324e-113	postive
SCLY	AC012557.2	0.605372	8.41258e-55	postive
ALG10	AC012557.2	0.634311	1.43874e-61	postive
SLC4A7	AC012557.2	0.720658	7.72557e-87	postive
SLC5A3	AC012557.2	0.623669	5.3592e-59	postive
PMM2	AC012557.2	0.650024	1.48486e-65	postive
FMO2	AL390755.1	0.466157	3.23433e-30	postive
ADH1B	AL390755.1	0.409468	4.80608e-23	postive
INMT	AL390755.1	0.488617	1.88091e-33	postive
ABCA9	AC005410.2	0.771808	6.92403e-107	postive
SCLY	AC005410.2	0.504982	5.77183e-36	postive
ALG10	AC005410.2	0.421551	1.83962e-24	postive
SLC4A7	AC005410.2	0.55574	1.09221e-44	postive
PMM2	AC005410.2	0.415544	9.47151e-24	postive
ABCA8	AC005901.1	0.508889	1.38338e-36	postive
ABCA9	AC005901.1	0.684258	4.09559e-75	postive
SCLY	AC005901.1	0.47012	9.03926e-31	postive
ACACB	AC005901.1	0.463807	6.83282e-30	postive
SLC4A7	AC005901.1	0.50939	1.1504e-36	postive
SLC5A3	AC005901.1	0.418545	4.1938e-24	postive
PMM2	AC005901.1	0.457811	4.48959e-29	postive
ABCA9	AC093423.2	0.740423	5.06415e-94	postive
SCLY	AC093423.2	0.644006	5.32225e-64	postive
ALG10	AC093423.2	0.632578	3.83303e-61	postive
SLC4A7	AC093423.2	0.804277	1.4442e-122	postive
SLC5A3	AC093423.2	0.687496	4.35931e-76	postive
PMM2	AC093423.2	0.691241	3.15024e-77	postive
DECR2	AL022341.2	0.426082	5.22708e-25	postive
SCNN1D	AL022341.2	0.505257	5.22346e-36	postive
ABCA9	AC027796.5	0.570789	1.42044e-47	postive
SCLY	AC027796.5	0.68237	1.4911e-74	postive
ALG10	AC027796.5	0.47763	7.7098e-32	postive
FLVCR1	AC027796.5	0.44038	8.68809e-27	postive
SLC4A7	AC027796.5	0.715581	4.29992e-85	postive
SLC5A3	AC027796.5	0.681133	3.45971e-74	postive
SLCO1B3	AC027796.5	0.414896	1.12791e-23	postive
PMM2	AC027796.5	0.574605	2.49292e-48	postive
B3GNTL1	AC132872.3	0.570981	1.30225e-47	postive
SCNN1D	AC132872.3	0.471389	5.99023e-31	postive
NAT9	AC132872.3	0.429125	2.22141e-25	postive
ADCY4	AC132872.3	0.411055	3.15474e-23	postive
SLC26A6	AC132872.3	0.412712	2.02774e-23	postive
SCLY	AC010735.1	0.422914	1.26248e-24	postive
SLC4A7	AC010735.1	0.449422	5.8773e-28	postive
SLC5A3	AC010735.1	0.449737	5.34343e-28	postive
PMM2	AC010735.1	0.407332	8.43982e-23	postive
ABCA9	FKBP14-AS1	0.642273	1.46973e-63	postive
SCLY	FKBP14-AS1	0.604088	1.61877e-54	postive
ALG10	FKBP14-AS1	0.547443	3.69323e-43	postive
SLC4A7	FKBP14-AS1	0.643907	5.63997e-64	postive
SLC5A3	FKBP14-AS1	0.644719	3.49654e-64	postive
PMM2	FKBP14-AS1	0.636872	3.34089e-62	postive
ABCA9	AL031705.1	0.537147	2.54957e-41	postive
SCLY	AL031705.1	0.526226	1.94649e-39	postive
ACACB	AL031705.1	0.419461	3.26537e-24	postive
B3GNTL1	AL031705.1	0.459554	2.60766e-29	postive
SCNN1D	AL031705.1	0.442716	4.36655e-27	postive
PMM2	AL031705.1	0.407901	7.26841e-23	postive
OGDHL	HAGLROS	0.417395	5.7353e-24	postive
ABCA9	AC138811.1	0.652615	3.10185e-66	postive
SCLY	AC138811.1	0.564553	2.32419e-46	postive
ALG10	AC138811.1	0.441026	7.18584e-27	postive
SLC4A7	AC138811.1	0.734498	8.42252e-92	postive
SLC5A3	AC138811.1	0.450728	3.95644e-28	postive
PMM2	AC138811.1	0.564811	2.07231e-46	postive
ABCA9	IQCJ-SCHIP1-AS1	0.6587	7.37265e-68	postive
SCLY	IQCJ-SCHIP1-AS1	0.551407	6.95237e-44	postive
ALG10	IQCJ-SCHIP1-AS1	0.690512	5.26966e-77	postive
SLC4A7	IQCJ-SCHIP1-AS1	0.72296	1.21211e-87	postive
SLC5A3	IQCJ-SCHIP1-AS1	0.626757	9.84453e-60	postive
PMM2	IQCJ-SCHIP1-AS1	0.662766	5.77173e-69	postive
ABCA9	AC009704.2	0.741268	2.41438e-94	postive
SCLY	AC009704.2	0.668505	1.47823e-70	postive
ALG10	AC009704.2	0.582035	7.8836e-50	postive
SLC4A7	AC009704.2	0.795402	5.32961e-118	postive
SLC5A3	AC009704.2	0.684708	3.00534e-75	postive
PMM2	AC009704.2	0.663854	2.8988e-69	postive
CYP27A1	AC026369.3	0.506143	3.78359e-36	postive
FMO2	AC026369.3	0.400617	4.82918e-22	postive
PNPLA6	AC026369.3	0.443136	3.85525e-27	postive
GPD1	AC026369.3	0.627236	7.5573e-60	postive
SLCO2B1	AC026369.3	0.417432	5.67811e-24	postive
INMT	AC026369.3	0.436943	2.36844e-26	postive
ABCA9	AC009159.2	0.74746	9.70078e-97	postive
SCLY	AC009159.2	0.501529	2.00868e-35	postive
ALG10	AC009159.2	0.664336	2.13393e-69	postive
SLC4A7	AC009159.2	0.700187	5.01422e-80	postive
SLC5A3	AC009159.2	0.541806	3.82167e-42	postive
PMM2	AC009159.2	0.593893	2.63794e-52	postive
ABCA9	AL390760.1	0.505217	5.30018e-36	postive
ABCA9	AC120053.1	0.435233	3.88359e-26	postive
SCLY	AC120053.1	0.61252	2.08185e-56	postive
B3GNTL1	AC120053.1	0.422809	1.29951e-24	postive
FLVCR1	AC120053.1	0.42764	3.3765e-25	postive
SLC4A7	AC120053.1	0.473931	2.61179e-31	postive
SLC5A3	AC120053.1	0.422503	1.41431e-24	postive
OGDHL	LINC01608	0.419615	3.13064e-24	postive
SCLY	AC073842.2	0.547425	3.72149e-43	postive
SCNN1D	AC073842.2	0.49692	1.0383e-34	postive
SLC26A6	AC073842.2	0.431845	1.02643e-25	postive
ATP6V1C2	AC073316.2	0.665445	1.05379e-69	postive
ABCA9	AC034198.2	0.635493	7.34612e-62	postive
SCLY	AC034198.2	0.547522	3.57373e-43	postive
ALG10	AC034198.2	0.46235	1.08334e-29	postive
SLC4A7	AC034198.2	0.623085	7.36814e-59	postive
SLC5A3	AC034198.2	0.48645	3.95405e-33	postive
PMM2	AC034198.2	0.453876	1.51388e-28	postive
ABCA9	AC087521.2	0.746576	2.15384e-96	postive
SCLY	AC087521.2	0.692364	1.42134e-77	postive
ALG10	AC087521.2	0.609914	8.10671e-56	postive
FLVCR1	AC087521.2	0.403018	2.60022e-22	postive
SLC4A7	AC087521.2	0.821727	2.86042e-132	postive
SLC5A3	AC087521.2	0.673381	6.15441e-72	postive
PMM2	AC087521.2	0.690674	4.69997e-77	postive
ABCA9	AC010997.3	0.527395	1.2332e-39	postive
SCLY	AC010997.3	0.42925	2.14454e-25	postive
SLC41A2	AC010997.3	0.427464	3.5481e-25	postive
SLC4A7	AC010997.3	0.530419	3.75382e-40	postive
PMM2	AC010997.3	0.478649	5.49433e-32	postive
SULT1C2	AC010997.3	0.448035	8.93242e-28	postive
PAH	CLLU1-AS1	0.467845	1.8829e-30	postive
SCNN1D	SLC9A3-AS1	0.456819	6.10889e-29	postive
ABCA9	AC006272.1	0.727239	3.68512e-89	postive
SCLY	AC006272.1	0.627747	5.69648e-60	postive
ALG10	AC006272.1	0.558353	3.52924e-45	postive
SLC4A7	AC006272.1	0.722945	1.22612e-87	postive
SLC5A3	AC006272.1	0.5276	1.1382e-39	postive
PMM2	AC006272.1	0.560573	1.34102e-45	postive
ABCA8	LANCL1-AS1	0.500743	2.66315e-35	postive
ABCA9	LANCL1-AS1	0.559351	2.28701e-45	postive
SCLY	LANCL1-AS1	0.403849	2.09603e-22	postive
ACADL	LANCL1-AS1	0.682185	1.69155e-74	postive
SLC4A7	LANCL1-AS1	0.447303	1.113e-27	postive
SLC5A3	LANCL1-AS1	0.445048	2.18485e-27	postive
ABCA9	AC083806.2	0.671501	2.11143e-71	postive
SCLY	AC083806.2	0.670442	4.21165e-71	postive
ALG10	AC083806.2	0.652746	2.86319e-66	postive
SLC41A2	AC083806.2	0.414565	1.23331e-23	postive
FLVCR1	AC083806.2	0.426375	4.81602e-25	postive
SLC4A7	AC083806.2	0.799539	4.23341e-120	postive
SLC5A3	AC083806.2	0.71301	3.18453e-84	postive
PMM2	AC083806.2	0.705737	8.15448e-82	postive
SCLY	SNHG20	0.547234	4.03102e-43	postive
B3GNTL1	SNHG20	0.5693	2.78311e-47	postive
NAT9	SNHG20	0.499946	3.54199e-35	postive
ABCA9	JARID2-AS1	0.607481	2.85263e-55	postive
SCLY	JARID2-AS1	0.615009	5.6141e-57	postive
ALG10	JARID2-AS1	0.53597	4.09939e-41	postive
SLC4A7	JARID2-AS1	0.761879	1.33436e-102	postive
SLC5A3	JARID2-AS1	0.569304	2.77873e-47	postive
PMM2	JARID2-AS1	0.665328	1.13538e-69	postive
ABCA9	LINC00484	0.634742	1.12595e-61	postive
SCLY	LINC00484	0.48095	2.5464e-32	postive
ALG10	LINC00484	0.429809	1.83041e-25	postive
SLC4A7	LINC00484	0.655128	6.6891e-67	postive
SLC5A3	LINC00484	0.523193	6.31151e-39	postive
PMM2	LINC00484	0.526804	1.55368e-39	postive
ABCA9	ITFG1-AS1	0.772237	4.4688e-107	postive
SCLY	ITFG1-AS1	0.674103	3.82384e-72	postive
ALG10	ITFG1-AS1	0.564439	2.4439e-46	postive
FLVCR1	ITFG1-AS1	0.405379	1.40768e-22	postive
SLC4A7	ITFG1-AS1	0.742658	7.09481e-95	postive
SLC5A3	ITFG1-AS1	0.613823	1.0497e-56	postive
PMM2	ITFG1-AS1	0.638635	1.21365e-62	postive
ACACB	AL022328.1	0.410088	4.07833e-23	postive
B3GNTL1	AL022328.1	0.492564	4.79393e-34	postive
SCNN1D	AL022328.1	0.585282	1.6941e-50	postive
ADCY4	AL022328.1	0.480946	2.54987e-32	postive
ABCA9	AL034550.1	0.506818	2.95682e-36	postive
SCLY	AL034550.1	0.559623	2.03077e-45	postive
SLC4A7	AL034550.1	0.533335	1.17903e-40	postive
SLC5A3	AL034550.1	0.428952	2.33286e-25	postive
PMM2	AL034550.1	0.53973	8.93356e-42	postive
ABCA9	GAS8-AS1	0.454752	1.1563e-28	postive
SCLY	GAS8-AS1	0.741955	1.32029e-94	postive
ALG10	GAS8-AS1	0.430005	1.73186e-25	postive
FLVCR1	GAS8-AS1	0.495864	1.50742e-34	postive
SLC4A7	GAS8-AS1	0.573074	5.02404e-48	postive
SLC5A3	GAS8-AS1	0.539606	9.39712e-42	postive
PMM2	GAS8-AS1	0.530278	3.96959e-40	postive
ABCA9	AL359880.1	0.69035	5.90833e-77	postive
SCLY	AL359880.1	0.603555	2.12243e-54	postive
ALG10	AL359880.1	0.567211	7.11206e-47	postive
SLC41A2	AL359880.1	0.448882	6.91991e-28	postive
SLC4A7	AL359880.1	0.775278	1.95669e-108	postive
SLC5A3	AL359880.1	0.605527	7.77124e-55	postive
SLCO1B3	AL359880.1	0.401751	3.60724e-22	postive
PMM2	AL359880.1	0.651068	7.9158e-66	postive
ABCA9	AC022400.4	0.630559	1.19071e-60	postive
SCLY	AC022400.4	0.635328	8.06963e-62	postive
ACACB	AC022400.4	0.403	2.61199e-22	postive
ALG10	AC022400.4	0.448354	8.11415e-28	postive
FLVCR1	AC022400.4	0.449234	6.22238e-28	postive
SLC4A7	AC022400.4	0.637448	2.40187e-62	postive
SLC5A3	AC022400.4	0.582204	7.28117e-50	postive
PMM2	AC022400.4	0.517337	5.91497e-38	postive
ABCA9	AC133644.1	0.555495	1.21345e-44	postive
SCLY	AC133644.1	0.50501	5.71401e-36	postive
ALG10	AC133644.1	0.582988	5.02839e-50	postive
SLC4A7	AC133644.1	0.652811	2.75263e-66	postive
SLC5A3	AC133644.1	0.554398	1.94308e-44	postive
PMM2	AC133644.1	0.595923	9.70789e-53	postive
ABCA9	SLIT2-IT1	0.789224	5.94301e-115	postive
SCLY	SLIT2-IT1	0.579472	2.62145e-49	postive
ALG10	SLIT2-IT1	0.652093	4.25592e-66	postive
SLC41A2	SLIT2-IT1	0.404799	1.63717e-22	postive
SLC4A7	SLIT2-IT1	0.795744	3.58778e-118	postive
SLC5A3	SLIT2-IT1	0.630776	1.05499e-60	postive
PMM2	SLIT2-IT1	0.673625	5.24019e-72	postive
SCLY	AC011773.3	0.469861	9.82904e-31	postive
ALG10	AC011773.3	0.414827	1.14903e-23	postive
SLC4A7	AC011773.3	0.478597	5.59045e-32	postive
ACADL	AC026992.2	0.408578	6.07991e-23	postive
[truncated: 9,753 more rows]

## Sheet: Supplementary Table S2
Supplementary Table S2: The clinical and pathological characteristics of LUAD samples	The result of univariate Cox analysis
id	HR	HR.95L	HR.95H	pvalue
AC012254.3	0.0586171	0.00563432	0.609827	0.0176042
AC008870.2	0.582714	0.356576	0.952268	0.0311511
AC011481.1	0.542627	0.306559	0.96048	0.0358728
AP005137.2	2.62419	1.78375	3.86062	9.67837e-07
AC068228.1	3.31068	2.06956	5.29608	5.90626e-07
AC092376.2	0.0975145	0.00998276	0.952551	0.0453097
LINC02390	0.0537474	0.0108519	0.266201	0.000341925
AL139041.1	0.556858	0.345714	0.89696	0.0160812
AP000251.1	1.48038	1.01249	2.1645	0.0429675
AC123595.1	0.30507	0.148148	0.628207	0.00127573
AC010999.1	0.224404	0.0744327	0.676543	0.00795502
AC092279.1	0.617662	0.444767	0.857768	0.00403204
AC090559.1	0.604387	0.419794	0.87015	0.00676964
AC127024.5	0.594422	0.40095	0.881251	0.00961981
AL512328.1	0.422117	0.18098	0.984543	0.0459324
AL731567.1	0.618991	0.428898	0.893336	0.0103908
AC087301.1	0.420627	0.188948	0.93638	0.0339257
AL390728.5	0.730479	0.541387	0.985616	0.0399024
AC104532.2	0.351887	0.169005	0.732666	0.00524986
ITGA9-AS1	0.0623078	0.0137044	0.283285	0.000327647
ACBD3-AS1	0.683286	0.504031	0.92629	0.0141603
AC022960.1	0.257762	0.0676273	0.98246	0.0470462
AC011477.3	0.042298	0.00689268	0.259568	0.000633152
AC022558.3	0.379768	0.159095	0.906525	0.0291809
H3-3A-DT	0.500655	0.251492	0.996673	0.0489015
AL359878.1	0.169555	0.0457661	0.628167	0.00791215
ZBED3-AS1	0.254642	0.0685301	0.946192	0.0410968
ZNF252P-AS1	0.176737	0.0378376	0.825525	0.0275404
AC109587.1	0.265102	0.085788	0.81922	0.0210903
AC124045.1	0.409632	0.209269	0.801831	0.00920179
AC091588.3	0.12504	0.032605	0.479526	0.00243241
AC124852.1	1.93796	1.10255	3.40638	0.0214928
AC099343.2	0.566923	0.330428	0.972683	0.0393484
AC005180.2	0.354314	0.137011	0.916267	0.0323261
AC005746.2	0.26638	0.0723574	0.980667	0.0466657
AC112722.1	0.455469	0.245957	0.843449	0.012366
LINC01936	0.489077	0.308471	0.775426	0.00235351
AC025569.1	0.306507	0.114304	0.821899	0.0187887
AC008764.2	0.493223	0.346981	0.701102	8.18458e-05
AC083906.3	0.182536	0.0509605	0.653828	0.00898327
AF131215.5	0.474669	0.294314	0.765544	0.00224673
AC051619.3	0.233682	0.0622345	0.877444	0.0312681
AC010976.2	0.319423	0.136067	0.749861	0.00876417
AC009275.1	1.48729	1.01893	2.17092	0.0396697
AL121845.4	0.450393	0.232277	0.873328	0.0182329
NR4A1AS	0.716543	0.534303	0.96094	0.0260105
AL592430.1	0.234249	0.0617051	0.889272	0.0329756
EML4-AS1	0.448099	0.22334	0.899043	0.0238508
COL4A2-AS1	0.232543	0.0643992	0.839703	0.0259705
AC005740.4	0.105964	0.0297627	0.377266	0.000531139
AC108865.1	2.84711	1.08775	7.4521	0.0330639
AC015853.1	0.272736	0.07773	0.956968	0.0424948
AC027288.3	0.505207	0.309401	0.824928	0.00634746
AL357093.1	0.265843	0.0845615	0.835753	0.0233916
AC044849.1	0.283873	0.0831768	0.968829	0.0443757
TTC28-AS1	0.396253	0.177815	0.883031	0.02356
MIR4435-2HG	1.65006	1.17049	2.32613	0.0042566
AL391807.1	0.0524714	0.0057657	0.477522	0.00889729
VIPR1-AS1	0.122077	0.0284612	0.523615	0.00464254
AC007879.3	2.56032	1.07743	6.08413	0.0332671
AP001893.1	0.506051	0.262791	0.974492	0.0416251
AL513128.1	0.145628	0.0224703	0.943804	0.0433191
AC138393.2	0.572277	0.328949	0.9956	0.0482034
MANEA-DT	0.270544	0.0885854	0.826255	0.0217329
AC108010.1	0.675059	0.485818	0.938017	0.0192219
AC025434.1	0.140785	0.0258065	0.768037	0.023522
GSEC	1.80231	1.25311	2.5922	0.00148942
LMO7DN	0.2099	0.0472851	0.931754	0.0400804
AC007569.1	0.415011	0.203592	0.845973	0.0155081
AL442128.2	0.196103	0.0472513	0.813873	0.0248583
AC021739.2	0.453827	0.213949	0.962656	0.0394788
AC092115.3	1.58939	1.02421	2.46644	0.0387673
AC018647.1	0.0114135	0.000862442	0.151045	0.000687951
LINC02106	1.77744	1.00062	3.15733	0.0497515
CCND2-AS1	0.13911	0.023235	0.832862	0.0307525
AC004921.1	0.499649	0.274615	0.909089	0.0230822
MIR210HG	1.37799	1.0344	1.83571	0.0284445
AC119424.1	0.280563	0.0885268	0.88917	0.0308069
AC018755.4	0.670912	0.476361	0.944922	0.0223599
LINC00852	0.33647	0.153606	0.737029	0.00647601
AC010680.5	0.0636634	0.00711641	0.569534	0.013759
AC025165.5	0.625034	0.422679	0.924266	0.0185455
LINC01091	0.244648	0.0776446	0.770852	0.0161979
SNHG12	0.758446	0.581332	0.989522	0.0415909
AL158163.2	0.321343	0.121986	0.846506	0.02161
TRG-AS1	0.474185	0.258025	0.871435	0.0162529
AL109947.1	0.239805	0.0682214	0.842937	0.0259896
AC139100.2	0.518723	0.287985	0.93433	0.0288008
MIR193BHG	1.54877	1.12498	2.1322	0.00731895
AL158163.1	0.351702	0.142965	0.865205	0.0228932
AC026369.3	0.538988	0.360644	0.805527	0.00257103
AL390760.1	0.179918	0.0363356	0.890876	0.035594
AC006272.1	0.225171	0.076181	0.665547	0.00701169
LANCL1-AS1	0.364141	0.175339	0.756241	0.00674321
LINC00484	0.0983996	0.0112227	0.862756	0.0363285
AC022400.4	0.354388	0.183623	0.68396	0.00198627
AC108134.3	0.575215	0.356419	0.928324	0.0235422
AC067852.2	2.17709	1.05922	4.47474	0.0343041
AC007000.3	0.238066	0.0644808	0.87895	0.0312737
SH3BP5-AS1	0.566254	0.392133	0.817691	0.00241689
AC020978.7	0.193538	0.0483566	0.774598	0.0202913
AC048341.1	0.388867	0.193809	0.780239	0.007851
ZEB2-AS1	0.0333874	0.00281911	0.395415	0.00702469
AC009107.2	0.356441	0.144204	0.881047	0.0254663
Z99943.1	1.56992	1.00877	2.44321	0.0456445
AC027097.2	0.26814	0.10197	0.705102	0.0076238
AC069234.5	0.37715	0.167162	0.85092	0.0188325
LINC01996	0.255014	0.070077	0.928008	0.0381416
AC083843.2	0.58198	0.403597	0.839206	0.00374767
LINC00996	0.479719	0.260798	0.88241	0.0181633
AL157394.1	0.564242	0.332177	0.958433	0.0342582
AC022893.1	0.211133	0.0639919	0.696606	0.0106627
MED4-AS1	0.176269	0.0608767	0.510388	0.0013748
AC023510.2	0.52167	0.277742	0.979829	0.0430396
AC005062.1	0.279937	0.0844126	0.928351	0.0373873
AC018809.2	0.357155	0.143839	0.886824	0.0265
U91328.1	0.276243	0.127324	0.599338	0.00113238
LINC00271	0.148608	0.0324281	0.681027	0.0141055
BAALC-AS1	0.418024	0.205968	0.848403	0.015727
AC007671.1	0.142429	0.0300557	0.674948	0.0140802
AC121493.1	0.280443	0.0868933	0.905111	0.0334421
AC090948.3	0.539527	0.326022	0.892852	0.0163531
MELTF-AS1	1.40169	1.01612	1.93358	0.0396502
AC006042.3	0.228603	0.0847619	0.616545	0.00355285
NFYC-AS1	0.544982	0.322042	0.922256	0.023729
TFAP2E-AS1	0.289368	0.139403	0.600661	0.000875064
AL021368.2	0.13411	0.0379037	0.474506	0.00183157
AL158063.1	0.302938	0.103953	0.882815	0.0286434
AC009226.1	2.53094	1.10934	5.77426	0.027346
AC135507.1	0.201939	0.0673311	0.605653	0.00430658
AL353622.1	0.592671	0.401036	0.875876	0.00866484
C9orf139	0.311207	0.101159	0.957401	0.0417614
NORAD	0.602067	0.384579	0.94255	0.026508
NUTM2B-AS1	0.24257	0.094278	0.624112	0.00330683
AC004492.1	0.500237	0.276838	0.903912	0.0217546
AC093726.1	0.645864	0.433525	0.962205	0.0316035
AC091544.4	0.451666	0.223624	0.912257	0.0266912
AL139397.1	0.17957	0.0494672	0.651855	0.00904048
AC011477.2	0.422918	0.270975	0.660061	0.000151236
AC138956.1	0.464868	0.247353	0.873659	0.0173344
LNCAROD	1.44254	1.10613	1.88126	0.00684174
AC011379.2	0.482227	0.235476	0.987546	0.0461268
MIR29B2CHG	0.64	0.412735	0.992405	0.046149
AC021517.1	3.40941e-05	5.73751e-09	0.202597	0.0203378
SLC2A1-AS1	2.52054	1.43249	4.43502	0.00134307
AC005180.1	0.195682	0.0511073	0.749239	0.0172459
AC084876.1	0.296114	0.112364	0.780356	0.0138321
MCF2L-AS1	0.763356	0.585309	0.995562	0.0462849
AL359220.1	0.195568	0.0621044	0.615847	0.00529954
AC005479.1	0.397644	0.238444	0.663135	0.000408986
AP002490.1	0.322613	0.105053	0.990729	0.0481281
AL035458.2	1.70458	1.02292	2.84049	0.040665
AC026785.3	1.17356	1.01405	1.35816	0.0317859
AC108449.2	0.711022	0.508673	0.993865	0.0459364
L3MBTL2-AS1	0.297185	0.112296	0.786482	0.0145385
AC104083.1	0.636258	0.477552	0.847708	0.00201144
AC027702.1	1.91397	1.06544	3.43827	0.0298523
AC105020.6	0.193824	0.0397538	0.945008	0.0423626
AL390208.1	0.398547	0.18033	0.880829	0.0229918
BMS1P4	0.199146	0.0583175	0.680052	0.0100149
AL021026.1	0.0656886	0.00679546	0.634981	0.0186565
ARMC2-AS1	0.488688	0.262877	0.90847	0.0236108
LINC02321	1.56809	1.10902	2.21718	0.0109125
AF111169.3	0.28017	0.108818	0.721347	0.00836679
AL139095.4	0.267495	0.0728039	0.982827	0.0470273
AL022157.1	0.400124	0.166761	0.960049	0.0402408
AC025287.3	0.531356	0.309268	0.912928	0.0220293
LINC00921	0.334502	0.141287	0.791947	0.0127589
AC027117.1	0.680848	0.548917	0.844489	0.000468765
TMPO-AS1	2.19823	1.4107	3.42539	0.000500742
LINC00543	1.73553	1.24492	2.41949	0.00114466
AC008875.1	0.531101	0.305919	0.922035	0.0245525
MIR155HG	0.669718	0.473781	0.946687	0.0231947
ZNF213-AS1	0.620569	0.393436	0.978829	0.0401703
AC103858.1	0.145362	0.0350388	0.603052	0.00789167
MAGEA4-AS1	1.38992	1.018	1.89773	0.0382441
Z97832.2	0.277072	0.110945	0.691952	0.00598615
WWC3-AS1	0.0514453	0.00299656	0.88322	0.0407985
AC007728.2	0.333611	0.134732	0.826052	0.0176416
LINC00641	0.631552	0.424442	0.939723	0.0234158
PCED1B-AS1	0.703842	0.53345	0.928658	0.0130167
AC020978.3	0.517476	0.284877	0.939991	0.0305284
EBLN3P	0.575682	0.394517	0.84004	0.00418313
AC022098.1	0.266283	0.0956	0.741699	0.0113517
AL049555.1	1.41592	1.17887	1.70062	0.000198962
AC018529.1	0.263402	0.0877873	0.790329	0.0173268
AL161457.2	0.0220549	0.000717604	0.677835	0.0290755
LINC01655	0.655691	0.507895	0.846494	0.00120034
AC007376.2	0.140586	0.0245962	0.803561	0.0273941
CYTOR	1.44161	1.0916	1.90384	0.00994912
AL390195.1	0.233767	0.0689593	0.79245	0.0196252
CYP1B1-AS1	0.172448	0.0491617	0.604908	0.00605069
AL691432.2	0.505688	0.34641	0.738202	0.000411492
PAN3-AS1	0.252644	0.120669	0.52896	0.000263107
LINC02679	0.169506	0.0402098	0.714558	0.0156146
AC023421.1	0.826169	0.695012	0.982077	0.0303861
AC108472.1	0.182368	0.0403621	0.823994	0.0269975
SUGCT-AS1	0.425558	0.19501	0.928667	0.0318858
AL133297.1	0.269036	0.0729928	0.991606	0.0485378
AC010260.1	0.292336	0.104677	0.816419	0.0189233
LINC00261	0.721632	0.584739	0.890572	0.00236737
AC022164.1	0.0839683	0.0178789	0.394358	0.00169531
AL590226.1	0.45714	0.248844	0.83979	0.0116467
AC010245.2	0.365624	0.189147	0.706756	0.00277087
LINC02520	0.161605	0.0265885	0.982234	0.0477673
AC023509.2	0.127205	0.0237063	0.682565	0.0161509
Z97989.1	0.135875	0.0452738	0.407786	0.000371286
AL606489.1	1.67873	1.22201	2.30615	0.00138624
AC073073.2	0.280956	0.0967136	0.816187	0.0196349
PAXIP1-AS2	0.55495	0.339592	0.906882	0.0187721
MIR600HG	0.574964	0.356657	0.926894	0.0231136
AC109809.1	0.215471	0.0541244	0.857794	0.0294376
TSPOAP1-AS1	0.216221	0.0780744	0.598807	0.0032121
AC012557.1	0.306114	0.143288	0.653967	0.00223924
AC079148.1	0.183953	0.0562694	0.601367	0.00508765
AL139123.1	0.303337	0.139696	0.65867	0.00256656
AC020913.3	0.620534	0.389761	0.987945	0.0443171
AP002026.1	0.271213	0.107663	0.683206	0.00563778
AC087752.3	0.338824	0.191631	0.599076	0.000197619
AC024075.1	0.454006	0.298743	0.689965	0.0002174
AP001029.2	0.108641	0.0147059	0.802599	0.0295939
AL445309.1	0.277362	0.096309	0.798778	0.0174888
MECOM-AS1	0.433356	0.225556	0.8326	0.0120784
AC110285.1	0.29625	0.105888	0.828842	0.0204716
AC023908.3	0.280988	0.0827948	0.953613	0.0417355
AC007546.1	0.468485	0.246166	0.891586	0.0209171
AC009120.2	0.53846	0.362384	0.800088	0.00218529
AC060766.5	0.342505	0.138008	0.850025	0.02087
AL031058.1	1.27475	1.01469	1.60146	0.0370476
AC106028.4	0.394649	0.180748	0.861683	0.0196163
AL356752.1	0.189805	0.0480973	0.749026	0.0176655
AL078581.2	0.565514	0.321246	0.995519	0.048208
RBPMS-AS1	0.645106	0.479633	0.867669	0.00374831
AC024075.3	0.374735	0.219258	0.640461	0.000331522
AC232271.1	0.584755	0.347406	0.984265	0.0434182
AC027020.2	0.511857	0.301589	0.868722	0.0130866
CADM3-AS1	0.0558175	0.0074787	0.416596	0.00489606
LINC02320	1.60653	1.05052	2.45684	0.028717
AC008121.2	0.283393	0.0864064	0.929461	0.037464
AC027601.2	0.277686	0.0805937	0.956769	0.0423584
PTPRN2-AS1	0.46917	0.24674	0.892114	0.0209909
GARS1-DT	0.545141	0.337893	0.879504	0.0129155
AC090912.1	0.430101	0.190563	0.970739	0.0422077
AL357079.1	0.516639	0.281954	0.946664	0.0325693
XPC-AS1	0.359659	0.165798	0.780194	0.00964821
AL360091.1	0.413607	0.178275	0.959586	0.0397789
LINC02587	0.1854	0.0405518	0.847641	0.0297715
AL358472.2	0.220398	0.0952981	0.50972	0.000407302
AC090229.1	0.175878	0.0395576	0.781977	0.022429
AC091151.2	0.000759813	1.03006e-06	0.56047	0.0330225
AC106882.1	0.262135	0.0768694	0.893917	0.032425
PFKP-DT	1.76009	1.19119	2.60069	0.00453589
AC138956.2	0.545491	0.339885	0.875475	0.0120412
AC104109.4	0.0582314	0.00764198	0.443719	0.0060659
LINC02323	2.24495	1.64434	3.06493	3.56497e-07
AC138207.5	0.626058	0.44004	0.890712	0.0092325
AC015802.3	0.411662	0.195429	0.867147	0.0195446
AC010273.3	0.667092	0.483881	0.919672	0.0134693
AC012236.1	0.637432	0.470344	0.863879	0.00369146
AL096701.3	0.229053	0.0774996	0.676977	0.00768656
LINC01409	0.182521	0.045195	0.737118	0.0169299
AL391095.3	0.166141	0.0345536	0.798844	0.0250728
AC005884.1	0.229794	0.0773984	0.682251	0.00808208
ITGB1-DT	1.4593	1.19416	1.78332	0.000220445
AL445489.1	0.26836	0.0731923	0.983942	0.047213
AL354989.1	0.511873	0.263292	0.995148	0.0483471
LINC00926	0.641341	0.441429	0.931788	0.0197714
HCG25	0.329337	0.114063	0.950906	0.0400711
LINC01150	0.55599	0.326284	0.947411	0.0308795
HIF1A-AS1	1.92223	1.00157	3.68916	0.049451
MHENCR	0.732949	0.557898	0.962927	0.0256627
AC013468.1	0.186523	0.0567543	0.61301	0.00567319
AC013403.2	0.430797	0.217231	0.854325	0.0159235
AC010201.1	0.462846	0.231539	0.925228	0.0292668
LINC02086	1.57702	1.10536	2.24994	0.0119901
AL138921.2	0.424907	0.2042	0.884163	0.0220641
AP4B1-AS1	0.40127	0.193192	0.833458	0.0143477
AC236972.3	0.633167	0.430873	0.93044	0.0199613
SDK1-AS1	0.138063	0.0348511	0.546938	0.00481617
AP000866.6	0.541517	0.296184	0.990062	0.0463265
SEMA3F-AS1	0.417562	0.216485	0.805408	0.00917053
CASC2	0.283148	0.0909886	0.881132	0.0293728
AC004494.1	0.276771	0.0820183	0.933967	0.0384475
AL133355.1	0.471944	0.304412	0.731677	0.00078954
AC009093.2	0.186316	0.042318	0.820301	0.0262906
MBNL1-AS1	0.253976	0.104757	0.615743	0.00241986
AP000695.1	1.78484	1.27935	2.49004	0.000649455
AC091588.1	0.314421	0.106484	0.928406	0.0362211
LINC02006	0.0911314	0.0151574	0.547914	0.00886218
AC012467.2	0.480975	0.248892	0.929467	0.029438
AC091544.2	0.332142	0.115878	0.952023	0.0402206
LINC00571	0.400025	0.161729	0.989431	0.047372
LINC00476	0.407567	0.169342	0.98092	0.0451821
LINC02410	0.00670381	0.000187819	0.239278	0.006069
AC012368.1	0.552167	0.331713	0.91913	0.0223535
AL137244.1	0.362752	0.136794	0.96195	0.0415572
ADAMTS9-AS2	0.042254	0.0063272	0.282179	0.00109116
AC007663.4	0.4044	0.184104	0.888295	0.0241336
AC074032.1	0.497351	0.26765	0.924185	0.0271496
LINC01359	0.136391	0.0210881	0.882133	0.0364712
AP003486.1	0.568412	0.35565	0.908456	0.0182122
GMDS-DT	0.134872	0.0390347	0.46601	0.00154042
RAB33B-AS1	0.329831	0.132356	0.821938	0.0172714
AC074138.1	0.422182	0.179542	0.992737	0.0480786
MAMDC2-AS1	0.0139565	0.000838437	0.232319	0.0029082
AC000403.1	0.110272	0.0247523	0.49126	0.00382292
ZRANB2-AS2	0.00126505	2.22964e-05	0.0717757	0.00120195
AC139887.4	0.654971	0.435798	0.984371	0.0417757
LINC02785	0.286724	0.107375	0.76564	0.0126723
LINC00426	0.443854	0.235152	0.837785	0.0122093
AC121247.1	0.0856558	0.0130336	0.562926	0.010524
SETBP1-DT	0.266832	0.116752	0.609833	0.0017321
TDRKH-AS1	0.552886	0.339373	0.900729	0.0173207
FENDRR	0.379628	0.207819	0.693476	0.00162903
AC015871.3	0.593304	0.406686	0.865556	0.00674327
OSGEPL1-AS1	0.360995	0.130665	0.997337	0.0494018
AF129075.1	0.363437	0.169026	0.781458	0.00956173
ZKSCAN7-AS1	0.252819	0.0916683	0.697266	0.00789317
AC021016.1	0.274268	0.144708	0.519829	7.32447e-05
AL353804.1	0.587826	0.378089	0.91391	0.0182854
AC034102.8	0.39725	0.178702	0.883078	0.0235104
NAV2-AS2	0.257796	0.075556	0.879595	0.0303994
AC124312.2	0.453962	0.230993	0.892156	0.0219631
LINC01116	1.5514	1.26084	1.90892	3.31668e-05
AL662844.3	0.478755	0.268643	0.8532	0.0124721
AC005277.2	0.149616	0.0402416	0.556264	0.00457744
AC079210.1	0.552355	0.373709	0.816399	0.00290569
AC060234.2	0.0489766	0.00598742	0.400625	0.00490797
AL365181.2	1.25951	1.06692	1.48687	0.00643127
AL158211.1	0.153511	0.0343074	0.686899	0.0142374
ADAMTS9-AS1	0.112898	0.0188304	0.67688	0.0169846
AL137003.1	0.499254	0.320682	0.777263	0.0021006
ABALON	1.81221	1.0638	3.08713	0.0287044
AC003991.1	0.213944	0.0607412	0.75356	0.0163766
AC090617.5	0.511272	0.310414	0.842098	0.00841379
LINC00412	0.280688	0.0983414	0.801147	0.0175828
AC008663.2	0.122565	0.0150602	0.997473	0.0497241
AP000695.2	2.18403	1.50088	3.17812	4.4741e-05
AC009495.2	0.206226	0.0526814	0.807293	0.0233655
AL445493.3	0.45154	0.263313	0.774319	0.00385886
RRN3P2	0.26095	0.116294	0.585542	0.00112238
AC106820.4	0.268424	0.0726585	0.991645	0.0485472
AC008543.4	0.0634925	0.0103674	0.388844	0.00286813
AP003119.3	1.30722	1.00731	1.69644	0.043934
AC006547.1	0.438851	0.227947	0.84489	0.013729
IRF1-AS1	0.480385	0.28705	0.803939	0.00526089
AC107214.1	3.44944	1.44599	8.2287	0.00524868
AL133330.1	0.484813	0.265442	0.885479	0.0184874
SEMA6A-AS1	0.15138	0.0362275	0.632554	0.00966196
AC008770.3	0.385978	0.186123	0.800433	0.0105234
AC007036.1	0.305206	0.10957	0.850149	0.0231733
ADPGK-AS1	0.014617	0.000706245	0.302525	0.00626954
AC004704.1	1.50531	1.24023	1.82704	3.49681e-05
AC024060.2	0.57017	0.405458	0.801795	0.0012381
AC127024.3	0.356494	0.138521	0.917464	0.0324706
AC018845.3	0.261892	0.101004	0.67906	0.00584843
AC010201.2	0.522861	0.280772	0.973684	0.0409506
LINC00707	1.95511	1.53223	2.49468	6.98026e-08
AL133553.1	0.129682	0.0210113	0.800398	0.0278261
MIR497HG	0.101562	0.023071	0.447088	0.00249025
AP000787.1	0.236315	0.0600448	0.930055	0.0390466
LINC00892	0.375744	0.168778	0.836506	0.016523
AC024257.1	0.0746544	0.0134929	0.413052	0.00294929
AC004908.2	0.548225	0.314835	0.95463	0.0336666
AC007613.1	0.0713812	0.0121065	0.420872	0.00354605
AL606469.1	0.155618	0.029974	0.807926	0.0268448
LINC02035	0.549243	0.327918	0.919952	0.0227854
TBX2-AS1	0.542638	0.318207	0.92536	0.0247797
AL365181.3	1.19847	1.03786	1.38394	0.0136578
AC004076.2	0.153002	0.0377081	0.620808	0.0086115
AP000766.1	0.362653	0.150851	0.871838	0.0234256
LINC02285	0.270706	0.103372	0.708914	0.00780577
RBM26-AS1	0.218999	0.0755511	0.634812	0.0051604
EP300-AS1	0.53475	0.348577	0.820358	0.00414559
AC124319.2	0.444514	0.203256	0.972136	0.0422809
AC145146.1	0.36254	0.134007	0.980814	0.0457041
AC087071.2	0.25886	0.0935456	0.716316	0.009257
AC234775.2	0.360089	0.167775	0.772846	0.00876113
AF131215.6	0.447225	0.259533	0.770653	0.00375227
AC024941.1	0.23011	0.0537302	0.985491	0.0477421
AL132656.2	0.125175	0.039862	0.393075	0.00037181
AC122129.1	0.292722	0.123431	0.694207	0.00529758
LINC02178	1.90185	1.50354	2.40568	8.26763e-08
AC046195.1	0.323926	0.121761	0.861754	0.0239457
DAAM2-AS1	0.256292	0.0727477	0.902922	0.034099
LINC01422	0.0945034	0.00912585	0.978637	0.0479207
MIR223HG	0.51767	0.337176	0.794787	0.00261286
AC012181.1	0.485357	0.315355	0.747001	0.00101676
STX18-AS1	0.193805	0.039497	0.950969	0.0431856
ATP13A4-AS1	0.582294	0.394228	0.860076	0.00657976
AC124016.1	0.606431	0.369134	0.996277	0.0483031
MEF2C-AS1	0.113064	0.0170962	0.747732	0.0237233
FBXO30-DT	0.273524	0.0874775	0.855254	0.0258285
AL356481.1	0.253906	0.104259	0.618349	0.00254061
AC008937.3	0.2037	0.0536917	0.772815	0.0193467
AC022167.3	0.219716	0.057645	0.837457	0.0264324
ACOXL-AS1	0.0671042	0.0131562	0.342271	0.00115541
AC015914.1	0.207277	0.0701674	0.612305	0.0044057
LINC02033	0.0554881	0.00521993	0.589841	0.0164984
AL033397.2	1.47614	1.18386	1.84058	0.00054189
HCG18	0.47271	0.252707	0.884243	0.0190276
AC105001.1	0.064123	0.0115077	0.357305	0.00172311
AC087854.1	0.0437816	0.0089142	0.215031	0.000116823
AC073896.3	0.474576	0.260947	0.863098	0.0145891
AC104785.1	0.321191	0.131095	0.78694	0.0129909
LMF1-AS1	0.1077	0.015335	0.756389	0.0250453
ZNF346-IT1	0.432275	0.195613	0.955262	0.0381632
LINC01559	1.50806	1.20128	1.8932	0.000399697
MIR99AHG	0.245714	0.0960333	0.628691	0.00340908
CCDC13-AS1	0.0289356	0.00319354	0.262176	0.0016299
AP001189.1	0.325225	0.132291	0.799537	0.0143877
GRASLND	1.97017	1.15627	3.35697	0.0126323
AC012213.1	1.48199	1.01089	2.17264	0.0438564
DDX11-AS1	2.92578	1.08744	7.87187	0.0335064
LINC01352	0.0853919	0.0204779	0.356081	0.000731952
AC010175.1	0.429314	0.192342	0.958244	0.03901
AC009268.2	0.311307	0.117342	0.825894	0.0190666
FMR1-IT1	0.628531	0.402699	0.981009	0.0409167
AC010998.1	0.184805	0.0526272	0.648958	0.00842219
AC100778.3	0.167324	0.0324355	0.863169	0.0327003
BDNF-AS	0.445528	0.216719	0.915909	0.0278882
LINC01082	0.18173	0.0428745	0.770292	0.0206598
ADNP-AS1	0.596849	0.366111	0.973008	0.0384805
AC107959.1	0.110877	0.0354716	0.346575	0.000155386
LINC01004	0.610731	0.426942	0.873637	0.0069436
AC092119.2	0.56277	0.34732	0.911867	0.0195622
AC010524.1	0.295791	0.103304	0.846942	0.0232398
AC010618.3	0.307034	0.127431	0.73977	0.00849446
AL049836.1	1.454	1.05772	1.99874	0.021131
AC026355.2	0.616589	0.440579	0.862916	0.00480667
AC006017.1	0.498414	0.270836	0.917222	0.0252454
AC012645.3	0.558876	0.33194	0.94096	0.0286037
A1BG-AS1	0.582393	0.359437	0.943647	0.028126
AC091132.2	0.284205	0.0971064	0.831795	0.0216705
AC069209.1	0.270375	0.081628	0.89556	0.0323158
AC093278.2	0.573863	0.347113	0.948736	0.0303783
AC087501.4	0.272513	0.101349	0.732743	0.00999088
LINC00663	0.198176	0.0792097	0.495819	0.000541524
LINC01269	1.45943	1.1025	1.93191	0.00824447
AC005486.1	0.202691	0.0462097	0.889072	0.0343593
AL161757.2	0.158457	0.028062	0.89475	0.0369895
AC009690.2	0.287324	0.107987	0.76449	0.0124961
AC090589.3	0.678844	0.469392	0.981757	0.0396121
AC009806.1	0.0976778	0.0229211	0.416251	0.00166088
AC011373.1	0.29262	0.0878308	0.974905	0.0453541
AC022400.1	0.460169	0.256937	0.824152	0.00904319
AC010999.2	0.237653	0.05848	0.965786	0.0445767
AC092802.1	0.0706857	0.00943816	0.52939	0.00990616
AC092718.4	0.415078	0.177781	0.969113	0.0421046
AC025917.1	0.516184	0.299131	0.890731	0.0175179
SNHG3	0.759034	0.581909	0.990073	0.041997
AC091057.1	1.70161	1.00033	2.89452	0.0498581
AF127936.1	0.242391	0.073353	0.800969	0.0201318
AC016957.2	0.497403	0.273308	0.905238	0.0222642
AC009974.1	0.473117	0.247938	0.902803	0.0232006
COLCA1	0.729273	0.563486	0.943836	0.0164291
LINC01266	0.0422963	0.00237986	0.751717	0.0312131
AC011825.2	0.447763	0.20822	0.962884	0.0397073
AC109361.2	0.428588	0.189632	0.968653	0.0416985
AC025171.3	0.506896	0.265451	0.967954	0.0395277
SUGT1-DT	0.584008	0.350107	0.974174	0.0393805
AC110792.3	0.447266	0.234741	0.852202	0.0144372
AC090912.2	0.245767	0.0639283	0.944833	0.0410963
LINC02718	0.0701251	0.0106093	0.463511	0.00581625
AC105020.5	0.280422	0.10977	0.716372	0.00788385
HLX-AS1	0.119893	0.0151305	0.950023	0.0445891
AL355075.2	0.676177	0.458845	0.996447	0.0479338
AL121655.1	0.372657	0.176191	0.788199	0.0098033
AC026462.3	2.53117	1.54459	4.14792	0.000228575
AC090948.1	0.348686	0.181635	0.669375	0.00154382
AC133961.1	0.157241	0.0247804	0.997748	0.0497212
AL157895.1	0.184871	0.0648305	0.52718	0.00159171
AC002553.2	0.648735	0.442661	0.950746	0.0264893
AL035530.2	0.271469	0.108816	0.677248	0.00518206
AC008669.1	0.293785	0.14991	0.575743	0.000359357
AC005479.2	0.481163	0.307209	0.753617	0.00139526
TBX5-AS1	0.467947	0.296084	0.739567	0.00114664
OGFRP1	3.4824	1.67664	7.23298	0.000820695
DLGAP1-AS1	1.29583	1.00567	1.6697	0.0451047
AL022311.1	0.127476	0.0166928	0.973477	0.0470466
AC090181.2	0.645541	0.445447	0.935516	0.0207721
CARD8-AS1	0.570125	0.371497	0.874955	0.0101337
AL031600.2	0.193661	0.0441105	0.850245	0.0296382
LINC00968	0.147979	0.0484729	0.451754	0.000792451
LINC01290	0.456121	0.220629	0.942969	0.0341384
AC026202.2	0.418648	0.234072	0.748771	0.00333232
AP002840.2	0.540176	0.339838	0.858613	0.00919639
AL590666.2	1.24893	1.0455	1.49194	0.0142681
AC068594.1	0.466991	0.253544	0.860127	0.0145464
AC005070.3	0.219364	0.0558716	0.861268	0.0297058
AP001486.2	0.20196	0.0896978	0.454724	0.000111983
AC137932.3	0.498878	0.272987	0.911689	0.0237894
AC008124.1	0.419148	0.218322	0.804706	0.00897864
AC069234.4	0.178399	0.0540596	0.588725	0.00465949
AL049780.2	0.469213	0.222834	0.988003	0.0464005
AC004112.1	0.148196	0.0399043	0.550364	0.00434401
AC093904.3	1.90472	1.00796	3.59928	0.0472121
LINC00941	1.77874	1.3963	2.26594	3.12118e-06
AL022724.2	0.419277	0.189594	0.927206	0.0318242
AC005014.2	0.357813	0.134736	0.950232	0.0391691
AC024075.2	0.487748	0.329429	0.722153	0.000336162
AC096920.1	0.0931307	0.0147152	0.589415	0.0116859
AL731563.3	0.222475	0.0659702	0.750262	0.0153828
AC090236.2	0.192731	0.0504556	0.736193	0.0160465
TRAF3IP2-AS1	0.343064	0.121923	0.965307	0.0426769
AC087588.1	1.64205	1.10012	2.45094	0.0152289
AL450384.2	0.591952	0.380738	0.920337	0.0198776
ZNF687-AS1	1.61855	1.02135	2.56493	0.0403735
AL137779.1	0.212813	0.0594207	0.762182	0.0174458
RAP2C-AS1	0.290389	0.124028	0.679894	0.00438772
AC027277.2	0.578264	0.338476	0.987926	0.0450254
AC106028.2	0.469403	0.241614	0.911946	0.0256156
AC092718.3	1.62239	1.22352	2.1513	0.000776139
FAM83A-AS1	1.50302	1.25921	1.79403	6.41186e-06
AC105389.2	0.516807	0.278534	0.958913	0.0363496
AC079766.1	0.195702	0.0563409	0.679775	0.0102424
AC099850.3	1.4448	1.17799	1.77204	0.000411512
SALRNA1	0.367572	0.142195	0.95017	0.0388805
AL132657.1	0.324928	0.153016	0.689983	0.00343593
AC018752.1	0.460696	0.26613	0.797507	0.00563831
AC139795.2	0.527062	0.318078	0.873354	0.0129369
AC107464.2	0.611947	0.405012	0.924611	0.0196911
LINC01275	2.18799	1.00302	4.7729	0.0491212
AC073534.2	0.538742	0.310218	0.935611	0.0280706
AC012181.2	0.534578	0.352793	0.810032	0.00314147
AC005674.1	0.427085	0.224888	0.811079	0.0093271
AC015853.3	0.163998	0.0277114	0.970558	0.0462717

## Sheet: Supplementary Table S3
Supplementary Table S3：Relative Fractions of tumor-infiltrating immune cells of LUAD patients by the CIBERSORT algorithm.
Mixture	B cells naive	B cells memory	Plasma cells	T cells CD8	T cells CD4 naive	T cells CD4 memory resting	T cells CD4 memory activated	T cells follicular helper	T cells regulatory (Tregs)	T cells gamma delta	NK cells resting	NK cells activated	Monocytes	Macrophages M0	Macrophages M1	Macrophages M2	Dendritic cells resting	Dendritic cells activated	Mast cells resting	Mast cells activated	Eosinophils	Neutrophils	P-value	Correlation	RMSE
TCGA-38-4626-11A-01R-1758-07	0.0252467	0	0.00172664	0.0394272	0	0.112321	0	0.00252818	0	0	0.00369917	0.0303679	0.0492044	0.355774	0	0.266613	0.00356254	0.0424131	0	0.0489174	0	0.0181994	0.001	0.382173	0.934477
TCGA-44-6148-11A-01R-1858-07	0.125587	0	0.0467998	0.0728699	0	0.223226	0.0126149	0	0	0	0.0503631	0.00904642	0.0448975	0.097826	0.0166002	0.124624	0.0053798	0.00667467	0.115875	0	0.00801798	0.039597	0.002	0.321465	0.948595
TCGA-44-5645-11A-01R-1628-07	0.0957138	0	0.0130959	0.135611	0	0.190103	0	0	0	0	0.0403094	0.0423449	0.044428	0.123615	0.0142654	0.14593	0.00319761	0.00575181	0.121408	0	0	0.0242259	0.001	0.355805	0.935078
TCGA-44-2668-11A-01R-1758-07	0.0802505	0	0.00679715	0.109978	0	0.0841411	0.0157376	0	0	0	0.0168432	0	0.0935452	0.212375	0.00421271	0.23595	0.014698	0.0063678	0.0595664	0	0	0.0595376	0.004	0.309254	0.958434
TCGA-91-6829-11A-01R-1858-07	0.0319427	0	0.0078976	0.0784207	0	0.0381348	0	0.0151509	0.0226955	0	0	0.0357011	0.0403346	0.413953	0.00991266	0.107544	0.0681712	0.0023242	0.0930484	0	0.0082887	0.0264801	0	0.396458	0.923689
TCGA-91-6849-11A-01R-1949-07	0.113461	0	0.0335974	0.0362986	0	0.254377	0	0	0	0	0.0793673	0.0485093	0.0534549	0.0931164	0.0393772	0.0947621	0.00504874	0.0288993	0.0929086	0	0	0.0268219	0.024	0.205673	0.996852
TCGA-50-5935-11A-01R-1858-07	0.0248712	0	0.00159079	0.0554871	0	0.199561	0	0	0	0	0.0601345	0.00220327	0.0411594	0.176005	0.081492	0.201307	0.0291779	0	0.121029	0	0.000683337	0.00529897	0.012	0.261894	0.975942
TCGA-44-6146-11A-01R-1858-07	0.0384411	0	0.00488024	0.190583	0	0.239189	0.0202949	0.0171613	0	0	0.0127805	0.0171643	0.0529112	0	0.0503659	0.186343	0.0113889	0.0101191	0.084797	0	0.0171502	0.0464304	0.017	0.224974	0.992764
TCGA-49-6744-11A-01R-1858-07	0.0470585	0	0.0104783	0.0798465	0	0.146758	0.0011005	0	0	0	0.0366211	0	0.00826196	0.210596	0.000349108	0.230436	0.00377204	0.0442033	0.147245	0	0.0263792	0.0068951	0.003	0.313435	0.954808
TCGA-49-6745-11A-01R-1858-07	0.00508244	0	0.000597352	0.0553732	0	0.210346	0.00571758	0.00192214	0	0	0.0573632	0.0227253	0.0403415	0.101657	0.0722776	0.1991	0.0760917	0	0.119416	0	0.0125397	0.0194496	0	0.421675	0.906429
TCGA-91-6836-11A-01R-1858-07	0.0179598	0	0.00262175	0.132037	0	0.1539	0.0212608	0	0	0	0.0476649	0	0.025737	0.227955	0.00583671	0.247987	0.00901973	0.0199739	0.0487781	0	0.0128295	0.026439	0.001	0.349477	0.941101
TCGA-55-6968-11A-01R-1949-07	0.0544566	0.0393957	0.0183423	0.0823554	0	0.046914	0	0.0456335	0.00731968	0	0	0.0571376	0.0833125	0.293088	0.0174005	0.114121	0.0170444	3.10604e-06	0.102605	0	0.00952801	0.0113425	0.003	0.318975	0.953428
TCGA-44-6778-11A-01R-1858-07	0.0393456	0	0.00327995	0.0540254	0	0.278705	0	0.0111845	0	0	0.00302901	0.0141391	0.0852042	0.0944173	0.0686095	0.0937422	0.0103335	0.0122102	0	0.125642	0.0102521	0.0958801	0.022	0.215937	0.998553
TCGA-55-6982-11A-01R-1949-07	0.0450181	0	0.00474121	0.18608	0	0.21241	0.00218809	0	0	0	0.00759555	0.0157171	0.0487602	0.121616	0.0949682	0.139719	0.0171409	0.0142354	0.0868665	0	0	0.00294345	0.002	0.342122	0.942222
TCGA-55-6984-11A-01R-1949-07	0	0	0	0.0552588	0	0.133434	0	0.00938418	0	0	0	0.0210688	0.0199688	0.138065	0.014973	0.341277	0.0364718	0.0532391	0.107639	0	0.0617299	0.00749026	0.011	0.266481	0.977084
TCGA-55-6981-11A-01R-1949-07	0.0107671	0	0	0.0321363	0	0.135281	0	0.00068643	0	0	0.00653044	0.0221219	0.033739	0.233665	0.0356079	0.311066	0.0317236	0	0.10048	0	0.0296561	0.0165395	0.014	0.239716	0.995098
TCGA-91-6835-11A-01R-1858-07	0.0623294	0	0	0.100798	0	0.155101	0	0.0458762	0	0	0	0.00357039	0.0197296	0.0468834	0.140425	0.23081	0.0415787	0.00511952	0.143909	0	0	0.00387128	0.007	0.284129	0.966833
TCGA-44-6776-11A-01R-1858-07	0.0067814	0	0	0.0756281	0	0.218466	0	0	0	0	0.0658277	0.0295925	0.0258315	0.150812	0.0160957	0.180022	0.00145107	0.118492	0.064641	0	0.0463594	0	0.045	0.165212	1.01745
TCGA-44-2665-11A-01R-1758-07	0.0773988	0	0.0019584	0.0546022	0	0.0845234	0	0.00226202	0.0135042	0	0.0191714	0.027758	0.0882161	0.120229	0.0212648	0.302061	0.00933592	0	0.127965	0	0.0012251	0.0485252	0.013	0.247034	0.982312
TCGA-91-6847-11A-01R-1949-07	0.0710786	0	0.0183326	0.0462569	0	0.136145	0	0.00881328	0	0	0.0244837	0.0112173	0.0424854	0.280297	0	0.217633	0	0.0305701	0.0676048	0	0	0.0450815	0.033	0.185509	1.01661
TCGA-44-3396-11A-01R-1758-07	0.0437824	0	0.00145406	0.0973701	0	0.256209	0.00985618	0	0	0	0.0238082	0	0.0886044	0.114014	0.0570499	0.195101	0.0127411	0.0105906	0.0633192	0	0	0.026101	0.002	0.323629	0.948961
TCGA-50-5931-11A-01R-1858-07	0.00540635	0.0139135	0.000202455	0.0753533	0	0.181459	0	0	0	0	0	0.0795047	0.0102368	0.22003	0.00369207	0.223477	0	0.0848904	0	0.0983181	0	0.00351619	0.017	0.225918	1.00262
TCGA-44-6145-11A-01R-1858-07	0.035343	0	0.0166238	0.0756297	0	0.235596	0.0144838	0	0	0	0.0352066	0.00675819	0.0631159	0.19185	0.00881186	0.134199	0	0.0516452	0.08074	0	0.0109914	0.0390054	0.044	0.165832	1.01375
TCGA-44-6144-11A-01R-1755-07	0.0195913	0	0.0009264	0.059107	0	0.244889	0	0	0	0	0.0340359	6.57285e-05	0.0271474	0.209287	0.0439572	0.204787	0.0705844	0.0218557	0.0474848	0	0.00614932	0.0101326	0.001	0.35998	0.93506
TCGA-55-6970-11A-01R-1949-07	0.0669495	0	0.00664955	0.0764369	0	0.314917	0.0174225	0.000478042	0	0	0.0279344	0	0.049151	0.123977	0.0991709	0.107905	0.00196323	0.0172408	0.0626694	0	0.000995274	0.0261394	0.007	0.281782	0.968434
TCGA-55-6969-11A-01R-1949-07	0.0535153	0.072962	0	0.085741	0	0.143751	0	0.00199121	0	0	0.0508118	0	0.0510859	0.195587	0.0172371	0.198402	0	0.0286669	0.0788258	0	0.000914817	0.0205079	0.014	0.235979	0.985812
TCGA-91-6828-11A-01R-1858-07	0.00555427	0	0.00190421	0.0664547	0	0.252922	0.0149613	0	0	0	0.0863477	0	0.0713876	0.149516	0.0216195	0.129158	0	0.0480075	0.054384	0	0	0.0977835	0.036	0.175844	1.01412
TCGA-49-6742-11A-01R-1858-07	0.0727252	0	0.0730339	0.0462836	0	0.0944429	0	0.0163015	0.00190028	0	0	0.0373176	0.0181909	0.207142	0.013138	0.260944	0.0178799	0	0.116423	0	0	0.0242773	0.002	0.334066	0.946478
TCGA-38-4627-11A-01R-1758-07	0.0425278	0	0.00764342	0.073664	0	0.219984	0	0	0	0.021913	0.0185926	0.00162297	0.107839	0.121958	0.0248593	0.185948	0.012215	0.0453249	0.107853	0	0	0.00805543	0	0.399174	0.916414
TCGA-49-4512-11A-01R-1858-07	0.0392904	0	0.0462195	0.043439	0	0.182905	0.00380483	0	0	0	0	0.0445513	0.00788025	0.0645705	0.078253	0.208592	0.123272	0	0.123665	0	0.0140682	0.0194885	0.002	0.337261	0.941587
TCGA-55-6983-11A-01R-1949-07	0.0139183	0	6.30293e-05	0.0927363	0	0.188876	0	0.00199622	0	0	0.0145512	0.0143885	0	0.250746	0.0683862	0.230702	0.0373236	0	0.0691276	0	0	0.0171853	0.014	0.233685	0.996075
TCGA-49-6761-11A-01R-1949-07	0.0335412	0	0.00253773	0.0783597	0	0.137356	0	0	0	0	0.0970039	0.0326093	0.0302939	0.272581	0.0122937	0.0965245	0.0321871	0.0627004	0.106411	0	0	0.00560137	0.001	0.352119	0.93887
TCGA-55-6975-11A-01R-1949-07	0.141964	0	0.0500628	0.0537292	0	0.201784	0.00632776	0	0	0	0.00221879	0.0210588	0.0525015	0.0976819	0.00445986	0.124029	0	0.0313677	0.137885	0	0.0291426	0.0457869	0.002	0.325194	0.946914
TCGA-44-2655-11A-01R-1758-07	0.0672963	0	0	0.0535567	0	0.229239	0.00359469	0	0	0	0.00678035	0.0135728	0.0339116	0.172089	0.0188663	0.170451	0.014794	0.0265229	0.146507	0	0.042365	0.000453679	0.022	0.215579	0.992457
TCGA-44-2657-11A-01R-1758-07	0.19836	0	0.0513637	0.146188	0	0.0914875	0.0163925	0.0566317	0.0301892	0	0	0.0392139	0.01742	0.0599671	0.0191517	0.115551	0.0429528	0.0245178	0.0711303	0	0	0.0194828	0.001	0.358669	0.934494
TCGA-50-5936-11A-01R-1628-07	0.013856	0	0	0.0657042	0	0.217122	0.00271701	0.00630501	0	0	0.0774889	0.00902564	0.0806728	0.203965	0.00529135	0.129478	0.0137105	0.0593526	0.0380853	0	0.0727073	0.00451792	0.034	0.183599	1.00951
TCGA-50-5932-11A-01R-1755-07	0.0153984	0	0.00886469	0.0570598	0	0.192326	0	0	0	0	0.0640376	0	0.0476437	0.073327	0.000190647	0.28705	0	0.0486302	0.157845	0	0.0420693	0.00555725	0.013	0.252367	0.977288
TCGA-44-2661-11A-01R-1758-07	0.0775773	0	0.00793887	0.0707156	0	0.193486	0.00211388	0.00167108	0.0054231	0	0	0.0126508	0.0156357	0.157804	0.0444951	0.231672	0.0504711	0	0.111273	0	0	0.017073	0.001	0.381415	0.924095
TCGA-49-6743-11A-01R-1858-07	0.0745551	0	0.00901151	0.0804145	0	0.160176	0.00508841	0.0119376	0	0	0	0.0294282	0.0339706	0.157643	0.0182237	0.18204	0.00293836	0.0168135	0.156688	0	0.0467646	0.0143069	0.002	0.333451	0.944
TCGA-55-6971-11A-01R-1949-07	0.035909	0	0.00556396	0.0817671	0	0.186916	0	0	0	0	0.0457656	0	0.0437815	0.203718	0.0314172	0.181578	0.00784434	0.0178398	0.103522	0	0.0355821	0.0187958	0.013	0.246379	0.981964
TCGA-50-6595-11A-01R-1858-07	0.0257776	0	0.00270383	0.092595	0	0.329186	0.0040102	0	0	0	0.0787971	0	0.0277581	0.101181	0.0676154	0.172347	0.0165735	0	0.067699	0	0.0103342	0.00342203	0.003	0.315256	0.954942
TCGA-55-6980-11A-01R-1949-07	0.102594	0	0.0327623	0.0992115	0	0.257544	0.024236	0	0	0	0.0222469	0.0199564	0.021259	0.0781376	0.050084	0.121154	0.0199198	0.000214004	0.1346	0	0	0.016081	0.008	0.27885	0.96659
TCGA-44-2662-11A-01R-1758-07	0.07782	0	0.00830383	0.0753502	0	0.23374	0	0	0	0	0.0344425	0.0368707	0.12506	0	0.0223685	0.175374	0	0.048284	0.0391651	0.0273221	0	0.0958997	0.085	0.110384	1.03615
TCGA-55-6986-11A-01R-1949-07	0.0426713	0	0.00182928	0.0677	0	0.290865	0	0	0	0	0.00588331	0.0187043	0.0262775	0.118323	0.0313895	0.186878	0.00685268	0.044793	0.0620488	0	0.0694987	0.026286	0.033	0.185685	1.00561
TCGA-38-4625-11A-01R-1758-07	0.0377825	0	0.00496599	0.0475733	0	0.107706	0	0.00112489	0	0	0.00700575	0.00952134	0.0958583	0.296692	0	0.187848	0	0.059443	0.0923975	0	0.0201834	0.0318977	0.001	0.351416	0.941786
TCGA-91-6831-11A-02R-1858-07	0.027411	0	0	0.100292	0	0.224298	0.0247638	0.0107946	0	0	0.0217024	0	0.0548458	0.169217	0.0364326	0.127011	0.00154459	0.0563416	0.0562386	0.0050673	0.0294089	0.0546309	0.014	0.240013	0.984616
TCGA-50-5933-11A-01R-1755-07	0.0819498	0	0.0165861	0.0845628	0	0.117984	0.00873949	0	0	0	0.0638553	0	0.0906823	0.10377	0.0174159	0.122028	0	0.108682	0.0589656	0	0	0.124779	0.013	0.250329	0.979151
TCGA-50-5939-11A-01R-1628-07	0.0311418	0.00971075	0	0.0557734	0	0.200776	0.00356324	0	0	0	0.0366916	0	0.106455	0.18027	0.0172206	0.191516	0.00732653	0	0.0594297	0	0.0629295	0.0371953	0.033	0.184918	1.008
TCGA-73-4676-11A-01R-1755-07	0.0271075	0	0.0011973	0.149187	0	0.149301	0.00601563	0	0	0	0.0423754	0.0149221	0.0726006	0.217265	0	0.137052	0.0579914	0.0668715	0.0445703	0	0.00720003	0.00634321	0.002	0.335924	0.945305
TCGA-55-6979-11A-01R-1949-07	0.0665493	0	0.0122227	0.0640622	0	0.201202	0.00110633	0.0422059	0	0	0	0.0197233	0	0.249818	0.0741428	0.180967	0.0134351	0	0.0300502	0	0.0102913	0.0342235	0.013	0.256145	0.983579
TCGA-50-5930-11A-01R-1755-07	0.133358	0	0.0308596	0.147853	0	0.0871468	0	0	0.0208382	0	0.0388206	0.013976	0.10096	0.0992867	0.00674302	0.15598	0.0128358	0.0146985	0.101449	0	0.0170433	0.0181504	0.007	0.290992	0.960677
TCGA-38-4632-11A-01R-1755-07	0.0243942	0	0.00503068	0.0989548	0	0.164136	0.0304373	0	0	0	0.0138162	0.0134177	0.0296488	0.104111	0.0346093	0.261168	0.0318153	0.0186388	0.10623	0	0.0272747	0.0363174	0.001	0.356113	0.934561
TCGA-49-4490-11A-01R-1858-07	0.0443008	0	0.00356874	0.121337	0	0.234925	0.0137856	0	0	0.0031779	0.0793465	0	0.00336172	0.0582565	0.0178765	0.18476	0.0750155	0.0471924	0.0908421	0	0.00176907	0.0204852	0.001	0.344909	0.93944
TCGA-44-3398-11B-01R-1758-07	0.00371418	0	0	0.0833211	0	0.190368	0	0	0	0	0.0880361	0.0317795	0.063093	0.177405	0.034048	0.100639	0.0228468	0.0520296	0.128093	0	0	0.0246269	0.004	0.307515	0.956663
TCGA-44-6777-11A-01R-1858-07	0.0254282	0.00537614	0.0356699	0.119043	0	0.170323	0	0	0	0	0.0185929	0.0157195	0.0598252	0.167743	0.0354422	0.201651	0.0107088	0.0265896	0.081536	0	0	0.0263507	0.017	0.225295	0.989542
TCGA-55-6978-11A-01R-1949-07	0.0209341	0	0.00158161	0.0573118	0	0.210823	0	0	0	0	0.129323	0.00520643	0.0811216	0.139275	0.0364998	0.158173	0.0041646	0.0360821	0.0899869	0	0.00956596	0.0199515	0.007	0.292659	0.962146
TCGA-55-6972-11A-01R-1949-07	0.0802174	0	0.0294235	0.191139	0	0.196469	0	0	0	0	0.0953896	0.0319446	0.0436821	0.0718077	0.0222779	0.150077	0.00293098	0.0160531	0.0563447	0	0	0.0122443	0.008	0.27411	0.974478
TCGA-55-6985-11A-01R-1949-07	0.0736117	0	0.00776707	0.0834757	0	0.172267	0.0186688	0	0	0	0.0108412	0.00546093	0.0438284	0.303436	0.00720759	0.15483	0.0207075	0.0214342	0.0507687	0.000343293	0.018195	0.00715678	0.006	0.294261	0.967016
TCGA-44-6147-11A-01R-1858-07	0.0771417	0	0.0291555	0.0378821	0	0.155469	0.0146327	0	0	0	0.0772051	0	0.0504114	0.203626	0.0114347	0.106686	0	0.0525222	0.0433481	0	0.0203457	0.12014	0.013	0.249949	0.981637
TCGA-MP-A4T8-01A-11R-A24X-07	0.0576673	0	0.0403354	0.0325095	0	0.0122478	0	0.0306871	0.0736784	0	0	0.0114382	0	0.436784	0	0.120892	0	0.154612	0.0243968	0	0	0.00475234	0.001	0.37103	0.941285
TCGA-MP-A4T6-01A-32R-A262-07	0.141931	0	0.0526123	0.0655129	0	0.191302	0	0.0513495	0.0497714	0	0	0.0179688	0	0.275793	0.0480394	0.0558187	0.0107642	0.0008915	0.0360941	0	0	0.00215109	0.002	0.332365	0.949548
TCGA-49-4510-01A-01R-1206-07	0.164893	0	0.310432	0.057532	0	0.0948642	0	0.0321988	0	0	0	0.0450184	0.00675921	0.00311979	0.00420613	0.157048	0.0186174	0.024131	0.0782816	0	0	0.0028987	0	0.520965	0.85642
TCGA-67-3772-01A-01R-0946-07	0.0368013	0	0.139047	0.0665735	0	0.15564	0.0152239	0	0	0.0149787	0	0	0.0334616	0.0386971	0.0235372	0.127577	0.233487	0.0324479	0.0756917	0	0	0.00683654	0.007	0.285055	0.964116
TCGA-69-7763-01A-11R-2170-07	0.138511	0	0.171	0.0781253	0	0.180255	0.0111566	0.020751	0.017873	0	0	0.0203014	0.0212644	0.0860716	0.0184307	0.13681	0.00662078	0.024999	0.0648266	0	0	0.00300447	0	0.424944	0.905014
TCGA-05-4410-01A-21R-1858-07	0.0888193	0	0.279796	0.126458	0	0.0937647	0.0700905	0.0377689	0.00170707	0	0.017952	0	0.00656541	0.0487963	0.0918526	0.0806459	0.0168718	0.000806777	0.0381052	0	0	0	0	0.498382	0.86719
TCGA-95-7039-01A-11R-1949-07	0.155181	0	0.0302164	0.170255	0	0.144984	0	0.00773107	0.00486811	0	0	0.0214168	0	0.165026	0.126008	0.116469	0.00354226	0	0.0543023	0	0	0	0.007	0.292105	0.967521
TCGA-MP-A4TC-01A-11R-A24X-07	0.0542424	0	0.0357213	0.120299	0	0.0992604	0.0670157	0.0262223	0.0201807	0	0.0163188	0	0	0.275411	0.0791409	0.142675	0.0283657	0	0	0.0334194	0	0.00172712	0.02	0.218882	1.00013
TCGA-62-A46S-01A-11R-A24H-07	0.107648	0	0.208979	0.0942734	0	0.143556	0.0174729	0.0140541	0.0290429	0	0	0.0113536	0.0131457	0.0677476	0.074198	0.0848823	0.0707382	0	0.0454562	0	0	0.0174516	0	0.496176	0.86771
TCGA-95-A4VK-01A-11R-A262-07	0.193592	0	0.0460464	0.127391	0	0.19727	0.0230846	0.0616012	0.0260619	0	0	0.013037	0	0.124981	0.079114	0.050675	0	0.01985	0.0372967	0	0	0	0.001	0.362573	0.935729
TCGA-49-AARO-01A-12R-A41B-07	0.173402	0	0.0747082	0.0565802	0	0.138541	0.0224253	0.0419718	0.0163689	0	0.0127241	0	0.00859506	0.226981	0.0338981	0.0943037	0.056255	0.0268299	0.0159259	0	0	0.000489692	0	0.43621	0.899168
TCGA-55-7994-01A-11R-2187-07	0.0309222	0	0.000453848	0.212129	0	0.0483094	0.0876754	0.0285066	0.0239475	0	0.0505672	0	0.00166648	0.154165	0.120089	0.165795	0.0289947	0.0176425	0.0291375	0	0	0	0.005	0.305436	0.960682
TCGA-49-6743-01A-11R-1858-07	0.119609	0	0.150144	0.0899863	0	0.124379	0.0576207	0.0119727	0.00958512	0	0.0288807	0	0	0.183868	0.0797877	0.11603	0	0	0.0236426	0	0	0.00449399	0	0.445194	0.894657
TCGA-78-7149-01A-11R-2039-07	0.184986	0	0.234809	0.101925	0	0.17545	0.00431418	0.0159906	0.00858807	0	0	0.0246134	0	0.052849	0.0648109	0.0555157	0	0	0.0675941	0	0	0.00855369	0	0.534864	0.844269
TCGA-44-7660-01A-11R-2066-07	0.0562435	0	0.0173663	0.089198	0	0.192467	0.00421085	0.0811992	0.0427653	0	0.00185311	0.0160068	0	0.141868	0.104765	0.167855	0.0428988	0.00441587	0.0307044	0	0	0.00618273	0.069	0.133604	1.03358
TCGA-53-7626-01A-12R-2066-07	0.124638	0	0.093957	0.137119	0	0.240227	0	0.0536567	0	0	0	0.00424381	0.0255874	0.065521	0.0575245	0.111456	0.0226438	0.00755723	0.0306766	0.0106995	0	0.0144927	0.002	0.338965	0.945125
TCGA-44-8119-01A-11R-2241-07	0.135673	0	0.139994	0.0560274	0	0.125286	0.0390815	0	0.0141303	0	0.0218043	0.0157217	0	0.267514	0.050355	0.108836	0	0	0.0221638	0	0	0.00341301	0.001	0.353173	0.941738
TCGA-44-2656-01A-02R-0946-07	0.09274	0	0.125654	0.18528	0	0.127441	0.039873	0.031559	0	0	0	0.03328	0.016354	0.0347637	0.0760862	0.123397	0.0263112	0.000964944	0.075649	0	0.00567613	0.00497056	0.001	0.353041	0.937709
TCGA-78-7153-01A-11R-2039-07	0.101168	0	0.133949	0.203172	0	0.118779	0.00540089	0.0301201	0.0340206	0	0	0.0521152	0.0185805	0.0575336	0.0181711	0.109691	0.015702	0.0098826	0.0912779	0	0	0.000436969	0.001	0.347654	0.941963
TCGA-55-6987-01A-11R-1949-07	0.0547898	0.000596408	0.128855	0.221751	0	0.0400069	0.0976206	0.046314	0.0024565	0.0128173	0.0295622	0	0.00102934	0.141108	0.125615	0.0577517	0.00636317	0	0.0273466	0	0	0.00601639	0.003	0.319749	0.955871
TCGA-78-7539-01A-11R-2066-07	0.0498424	0	0.0389356	0.172804	0	0.175459	0.0477714	0.0386366	0.0403908	0	0	0.0238964	0.0134087	0.0416374	0.0638812	0.124558	0.0755363	0.0337211	0.0556727	0	0	0.00384813	0.009	0.272584	0.97106
TCGA-83-5908-01A-21R-2287-07	0.0882616	0	0.0169081	0.282131	0	0.085929	0.161242	0.0319602	0.00382191	0	0.0578233	0	0.00987958	0.0423101	0.0965156	0.0554605	0.0595129	0	0.00824347	0	0	0	0	0.389432	0.922815
TCGA-95-7567-01A-11R-2066-07	0.0929366	0	0.147421	0.119305	0	0.21649	0.0393189	0.0285191	0.0227052	0	0	0.0145977	0	0.0272626	0.0646688	0.172275	0.0221251	0.0196908	0.011136	0	0	0.00154748	0.002	0.326092	0.952762
TCGA-55-7574-01A-11R-2039-07	0.144002	0.0209906	0.112067	0.105139	0	0.245214	0.0775219	0.00560713	0	0	0.00818167	0	0	0.108281	0.0338116	0.0810586	0.00957585	0.0243427	0.0210797	0	0	0.00312676	0	0.403854	0.915205
TCGA-44-7667-01A-31R-2066-07	0.016009	0	0.0224323	0.0756676	0	0.117603	0.0075165	0.0227138	0.000912593	0	0	0.0832026	0.00237055	0.394336	0.0637269	0.181096	0	0	0.0112001	0	0	0.00121269	0.124	0.0914611	1.08196
TCGA-75-6205-01A-11R-1755-07	0.0241502	0	0.00813691	0.0921743	0	0.248773	0.0422636	0.00393061	0.0130271	0	0.0254771	0	0.00178403	0.108576	0.081842	0.258295	0.025027	0	0.0496346	0	0.0120205	0.00488783	0.084	0.112406	1.03877
TCGA-69-8254-01A-11R-2287-07	0.114621	0	0.0576601	0.0865585	0	0.196701	0.00389007	0	0	0.0388781	0	0.00773695	0.0140773	0.0928651	0.102937	0.124792	0.0453727	0.0111096	0.1028	0	0	0	0.008	0.276091	0.968559
TCGA-44-A47G-01A-21R-A24H-07	0.0463209	0.0130495	0.109252	0.147489	0	0.18806	0.0803987	0	0	0	0	0	0.00925566	0.11596	0.0500067	0.113696	0.0555641	0.00983964	0.0480304	0	0	0.0130772	0.003	0.318632	0.950823
TCGA-44-2668-01A-01R-A278-07	0.0399792	0	0.0273525	0.0255901	0	0.131243	0.0931045	0	0	0	0.0240941	0.0118564	0	0.281701	0.0580005	0.0765807	0.00181123	0.00923289	0	0.17035	0.00219892	0.0469045	0.013	0.251987	0.990765
TCGA-44-6775-01C-02R-A277-07	0.124223	0	0.0200707	0	0	0.366296	0.0242529	0	0	0	0	0.0323056	0.0137076	0	0	0.152913	0.0217819	0.0594767	0.122841	0	0.0554832	0.00664888	0.022	0.212325	0.993486
TCGA-78-7163-01A-12R-2066-07	0.139974	0	0.123802	0.228135	0	0.216491	0.0129081	0.036672	0.0208678	0.011508	0	0.0124515	0.00798248	0.0190497	0.0307723	0.0605182	0.0207628	0.0249746	0.031348	0	0	0.00178273	0.001	0.353502	0.945838
TCGA-91-A4BC-01A-11R-A24H-07	0.0905648	0	0.117384	0.350636	0	0.0459198	0.154397	0.0351407	0.00389216	0	0	0.0166658	0.00657258	0.0395187	0.0316167	0.0595709	0.0018048	0	0.0427097	0	0	0.00360656	0.002	0.338761	0.950607
TCGA-55-5899-01A-11R-1628-07	0.0354285	0	0.0035747	0.091774	0	0.127436	0.0746398	0.0305449	0.0270149	0	0.0396822	0	0	0.280751	0.0594587	0.187182	0.00243737	0	0.0400754	0	0	0	0.069	0.133607	1.0382
TCGA-J2-A4AD-01A-11R-A24H-07	0.189061	0	0.0991071	0.0855418	0	0.161168	0	0.0115077	0.000332352	0	0	0.0102439	0.0148849	0.141626	0	0.159234	0	0.0681808	0.0591124	0	0	0	0.001	0.379078	0.926455
TCGA-69-7974-01A-11R-2187-07	0.0670089	0	0.025556	0.0947552	0	0.170989	0.0424128	0.0256755	0	0	0	0.0396596	0.0241561	0.0996826	0.043359	0.192255	0.0949435	0.0148648	0.0564719	0	0	0.00820991	0.013	0.256206	0.974335
TCGA-69-7980-01A-11R-2187-07	0.0421125	0	0.00438865	0.150175	0	0.172287	0.0829001	0.0722955	0.0193127	0	0	0.00267517	0.0432005	0.0510349	0.119132	0.15832	0.00502406	0.00305869	0.0588076	0	0	0.0152769	0.014	0.240334	0.987186
TCGA-05-4417-01A-22R-1858-07	0.0570361	0	0.107303	0.0701541	0	0.201639	0.0969047	0.0384298	0.023989	0	0	0.017809	0.0149603	0.122724	0.0255639	0.0834367	0.0647949	0.0400266	0.0236301	0	0	0.0115978	0.003	0.311498	0.953788
TCGA-75-5122-01A-01R-1755-07	0.0120468	0	0.00448157	0.306194	0	0.0949976	0.0403931	0.0246102	0.00142224	0	0	0	0.0279909	0	0.0510645	0.268827	0.11457	0	0	0.0368246	0.0139427	0.00263441	0	0.401212	0.915664
TCGA-05-5425-01A-02R-1628-07	0.0858546	0	0.0766855	0.17248	0	0.0582198	0.10634	0.0107735	0.00359724	0.000554144	0	0.00794824	0	0.0705583	0.123087	0.145719	0.0293896	0.0101988	0.0675703	0	0.000895047	0.0301292	0.006	0.29866	0.959258
TCGA-44-6146-01A-11R-1755-07	0.0308405	0	0.0262193	0.159604	0	0.315092	0.0139525	0.0134082	0	0	0.0132649	0	0.0276952	0.0166153	0.0865239	0.0918654	0.101979	0	0.0692025	0	0	0.033738	0.109	0.0988652	1.04741
TCGA-67-3770-01A-01R-0946-07	0.0843935	0	0.010927	0.0619528	0	0.245955	0.0201656	0.0221724	0	0.048166	0	0	0	0.0670528	0.0620987	0.204073	0.027128	0.0484355	0.0740162	0	0	0.0234634	0	0.390912	0.919627
TCGA-MP-A4T4-01A-11R-A262-07	0.0294928	0	0.0405963	0.178666	0	0.175166	0.0672647	0.0476326	0.0399199	0	0.0231679	0	0	0.130039	0.109578	0.113002	0.00981221	0	0.0353249	0	0	0.000337577	0.08	0.118816	1.0434
TCGA-05-4403-01A-01R-1206-07	0.168731	0	0.0279316	0.0209871	0	0.169522	0	0.0062207	0.00486265	0	0	0.0244836	0.0347092	0.184527	0.0561521	0.157031	0.0281133	0	0.112978	0	0.00375064	0	0.001	0.362301	0.932393
TCGA-97-7938-01A-11R-2170-07	0.128052	0	0.0482089	0.137745	0	0.155425	0.0273531	0.0276632	0	0	0	0.00749528	0.0010384	0.12402	0.0532984	0.0884653	0.0877448	0.00995968	0.0693377	0	0.0223845	0.011809	0.012	0.262373	0.972908
TCGA-62-A46P-01A-11R-A24H-07	0.147419	0	0.18162	0.0788174	0	0.109769	0.00134038	0.0444452	0.00835043	0	0	0.0288945	0	0.0730094	0.0109994	0.222082	0	0.0408231	0.0396288	0	0	0.0128007	0	0.466498	0.883737
TCGA-NJ-A4YF-01A-12R-A262-07	0.189671	0	0.07691	0.0687973	0	0.0953082	0	0.0309575	0.0278124	0	0.0223757	0	0	0.31301	0.0393193	0.105056	0	0	0	0.0229453	0	0.00783786	0	0.413627	0.911983
TCGA-50-5055-01A-01R-1628-07	0.121513	0.0434115	0.120787	0.152096	0	0.084095	0.0247228	0.0362333	0.0586334	0.004872	0	6.74548e-05	0	0.136853	0.0434399	0.0793047	0.0497682	0.0087529	0.0354506	0	0	0	0	0.452665	0.890913
TCGA-44-6776-01A-11R-1858-07	0.0528016	0	0.0888939	0.094617	0	0.272694	0.0160608	0.0444775	0	0	0	0.0237792	0.0266734	0.0245283	0.0377959	0.0715688	0.117797	0.0434809	0.0792382	0	0	0.00559373	0.014	0.242032	0.982506
TCGA-62-8399-01A-21R-2326-07	0.138309	0	0.106829	0.111598	0	0.151893	0.00922181	0.0210348	0	0	0.0133174	0.0164182	0.0459463	0.0494755	0.0541045	0.108512	0.0103309	0.0600255	0.0725229	0	0.0137558	0.016707	0.002	0.339595	0.942443
TCGA-64-5775-01A-01R-1628-07	0.0499956	0	0.0215187	0.0526642	0	0.139696	5.80516e-06	0.0151988	0.029134	0	0	0.0267926	0.0214974	0.262688	0.0405823	0.315694	0	0	0	0.00505789	0	0.019475	0.044	0.165743	1.03322
TCGA-86-8672-01A-21R-2403-07	0	0.00603902	0.0514284	0.280728	0	0.0239039	0.123902	0.0494718	0.0312533	0	0.0175364	0	0.00647738	0.142556	0.0565793	0.167904	0.020572	0	0.021648	0	0	0	0.08	0.118944	1.03894
TCGA-64-1677-01A-01R-0946-07	0.073771	0	0.169417	0.11355	0	0.0807715	0.170733	0.0475642	0.00645123	0.0235297	0	0	0	0.0946552	0.130134	0.0602185	0.00888163	0.00467643	0.0118742	0	0	0.00377219	0.001	0.362672	0.936479
TCGA-93-A4JO-01A-21R-A24X-07	0.138415	0	0.0655156	0.110042	0	0.222612	0.00420113	0.0290107	0.0268971	0	0.00591898	0.00019265	0	0.130028	0.0833439	0.140337	0.00674885	0	0.033049	0	0	0.00368809	0.002	0.336209	0.94608
TCGA-NJ-A4YP-01A-11R-A262-07	0.0747886	0	0.0910095	0.0882227	0	0.179879	0.0281407	0.040148	0.0193907	0.00934359	0	0.0437857	0	0.15966	0.0530252	0.137157	0.0054005	0.0446238	0.0112995	0	0	0.0141251	0.004	0.308146	0.957493
TCGA-05-4389-01A-01R-1206-07	0.0438473	0	0.00308091	0.257451	0	0.0501144	0.0746603	0.0225076	0.0494681	0	0	0.000122221	0	0.0826356	0.0998444	0.126268	0.115275	0.00500343	0.0652288	0	0	0.00449258	0.008	0.273781	0.970798
TCGA-97-8171-01A-11R-2287-07	0.0769476	0	0.0676375	0.0154105	0	0.126928	0	0.0339962	0	0	0	0.0148602	0	0.315128	0.0113369	0.250194	0.0113801	0.0293215	0.0467618	0	0	9.73517e-05	0.006	0.300125	0.969488
TCGA-05-4425-01A-01R-1755-07	0.0218797	0	0.00233689	0.0491267	0	0.202167	0.025116	0.0133858	0.00483506	0	0	0.0129117	0.000579309	0.213127	0.0595138	0.245576	0.133206	0	0.0162379	0	0	0	0	0.573072	0.828684
TCGA-44-6147-01B-06R-A277-07	0.225803	0.0129115	0.0125201	0	0	0.447275	0.0240639	0	0	0.000708485	0	0.00174349	0	0	0.0364705	0.113581	0	0.0634778	0.0305475	0	0.0291961	0.00170216	0.004	0.30723	0.964278
TCGA-91-6835-01A-11R-1858-07	0.0354801	0.042831	0	0.144842	0	0.196732	0.0393084	0.0268485	0.0405821	0	5.6525e-05	0	0	0.221695	0.0764946	0.117571	0.0320133	0	0.0255441	0	0	0	0	0.510539	0.862027
TCGA-55-1592-01A-01R-0946-07	0.100641	0	0.0937295	0.050825	0	0.124731	0.00626992	0.00437643	0.00926834	0	0.0219884	0.00173896	0.0505872	0.22537	0.0450746	0.117034	0.0857646	0	0.0552612	0	0.00274349	0.00459561	0.001	0.347067	0.939697
TCGA-69-7760-01A-11R-2170-07	0.0677426	0	0.0179993	0	0	0.11133	0.00904496	0.0473177	0.0192378	0	0	0	0.00913675	0.183782	0	0.107635	0	0.368003	0.0514547	0	0	0.00731549	0.03	0.18972	1.02816
TCGA-64-5778-01A-01R-1628-07	0.0722202	0	0.101804	0.230631	0	0.100683	0.112294	0.0253891	0.0488926	0.000959159	0	0	0	0.070004	0.129312	0.0806206	0	0	0.0271894	0	0	0	0.003	0.31648	0.958506
TCGA-55-8620-01A-11R-2403-07	0.0203041	0.0156489	0.0669337	0.139616	0	0.13367	0.0337055	0.0332738	0.0342745	0	0	0.0186668	0	0.212539	0.106084	0.102257	0.0117454	0	0.0712819	0	0	0	0.039	0.173371	1.01593
TCGA-53-7813-01A-11R-2170-07	0.131183	0	0.352864	0.169177	0	0.0407728	0.132876	0.0257351	0.00976887	0	0	0.0175729	0.0131925	0.0284724	0.0347242	0.0149636	0.00360386	0.00434667	0.0207465	0	0	0	0	0.480858	0.892148
TCGA-55-6982-01A-11R-1949-07	0.0121174	0.0398182	0.0457316	0.0659187	0	0.103404	0.0180804	0.0405722	0.0290432	0	0	0.0148309	0	0.209605	0.121828	0.163394	0.0550084	0.0161768	0.0604147	0	0	0.00405578	0.041	0.170861	1.01728
TCGA-55-A491-01A-11R-A24H-07	0.1291	0	0.205019	0.102636	0	0.04702	0.0385459	0.0186638	0.0288893	0	0	0.0319577	0.00386042	0.201122	0.0655494	0.0552404	0.0147281	0	0.0510427	0	0	0.00662517	0	0.472568	0.880679
TCGA-55-8094-01A-11R-2241-07	0.112964	0	0.0636667	0.116059	0	0.0658955	0.0227123	0.0796478	0	0	0	0.0380013	0	0.10503	0	0.0995103	0	0.250387	0.0433132	0	0	0.00281271	0.15	0.0805355	1.0564
TCGA-62-A46R-01A-11R-A24H-07	0.112688	0	0.019853	0.0967906	0	0.215835	0.0317172	0	0.0215049	0	0	0.0568547	0.0571329	0.0431436	0.00180727	0.103146	0.00962868	0.094715	0.134714	0	0	0.000469943	0.014	0.242127	0.981027
TCGA-78-7542-01A-21R-2066-07	0.0670831	0	0.0475011	0.1039	0	0.0996364	0.055604	0.0453037	0.0396177	0	0.0269606	0.00865063	0.00422287	0.0794893	0.152867	0.0715924	0.0541934	0.0998899	0.0434879	0	0	0	0.024	0.206704	1.00618
TCGA-86-8073-01A-11R-2241-07	0.0326644	0	0.00525449	0.0876171	0	0.220358	0	0.0295002	0.0160026	0	0	0.0120748	0.113365	0.0744028	0.0683562	0.233097	0.0533868	0	0.0528232	0	0	0.00109707	0.033	0.184651	1.00603
TCGA-49-AAR9-01A-21R-A41B-07	0.0476179	0	0.0097652	0.136453	0	0	0.00122956	0.0920912	0.0236081	0.0584017	0	0.0331627	0	0.430682	0.0694327	0.0459424	0	0.0454218	0	0	0.00507117	0.00112016	0.001	0.353891	0.948481
TCGA-91-6848-01A-11R-1949-07	0.0667315	0	0.0960111	0.093644	0	0.240799	0.0497924	0	0	0	0.00854709	0.00463304	0.00440252	0.16121	0.109325	0.120595	0.0177073	0	0.0193971	0	0	0.00720419	0.013	0.253073	0.982769
TCGA-05-4424-01A-22R-1858-07	0.0858699	0	0.0521689	0.0725464	0	0.208008	0.0310216	0.0165507	0.00038149	0	0.00627388	0	0.0372521	0.122352	0.0915106	0.187363	0.0314037	0.00616798	0.0450356	0	0	0.00609343	0.006	0.29677	0.959752
TCGA-55-7227-01A-11R-2039-07	0.055223	0	0.00161258	0.0689861	0	0.186147	0.00154691	0.00373953	0.0662184	0	0	0.0532952	0.0093737	0.119765	0.0903763	0.091979	0.142745	0.00529571	0.0991919	0	0	0.00450484	0.018	0.222821	0.989847
TCGA-55-A48Z-01A-12R-A24X-07	0.0680816	0	0.208677	0.0729786	0	0.110088	0.00833863	0.0146352	0.0525505	0	0.00743043	0.00255081	0	0.204895	0.0639308	0.131105	0.0306959	0	0.0240429	0	0	0	0	0.469636	0.882195
TCGA-MN-A4N4-01A-12R-A24X-07	0.143868	0	0.0861701	0.0403885	0	0.0473729	0.0224361	0.0204213	0.0245118	0.0139366	0	0	0	0.420956	0.0313305	0.102493	0	0	0.0424765	0	0	0.00363952	0.001	0.376817	0.935453
TCGA-49-6744-01A-11R-1858-07	0.108499	0	0.087516	0.112003	0	0.224389	0.0244495	0.00600349	0.00818065	0	0	0	0.0197819	0.0690485	0.0443554	0.0868106	0.0876567	0.0471222	0.0677086	0	0	0.00647552	0.001	0.354972	0.935167
TCGA-73-4676-01A-01R-1755-07	0.0141941	0	0	0.079673	0	0.14288	0.0157726	0	0.00692032	0	0	0	0.0608622	0.171075	0	0.284114	0.00637776	0.074567	0.115371	0	0	0.0281932	0.004	0.307091	0.958531
TCGA-38-4630-01A-01R-1206-07	0.0961305	0	0.0284695	0.13209	0	0.223341	0.00924384	0.00166022	0	0	0.0149351	0	0	0.228079	0.095118	0.147187	0.0131752	0	0	0.0105702	0	0	0.024	0.206507	1.00752
TCGA-75-6207-01A-11R-1755-07	0.0321137	0	0.00532893	0.0551849	0	0.255565	0.0104204	0.0262586	0.00909261	0	0.00900652	0	0.0464083	0.164432	0.0223537	0.17705	0.0159012	0.0868739	0.0516906	0	0	0.0323191	0.055	0.151756	1.02154
TCGA-86-A4P7-01A-11R-A24X-07	0.100079	0	0.142824	0.114169	0	0.150094	0.0113754	0.0532265	0.0084648	0	0.0047898	0.0185963	0.00587052	0.140458	0.0270856	0.165301	0.0139233	0	0.0401484	0	0	0.00359502	0.001	0.386845	0.922925
TCGA-05-4405-01A-21R-1858-07	0.174884	0	0.144102	0.0172403	0	0.0997385	0.0146468	0	0.02775	0	0.0154838	0	0	0.293711	0.00392979	0.13407	0	0.00732322	0.0668981	0	0	0.000222223	0	0.416221	0.912047
TCGA-75-7027-01A-11R-1949-07	0.0898332	0	0.0586484	0.0831385	0	0.150758	0.0578636	0.0269318	0.0472101	0	0.0323121	0	0.00490365	0.186534	0.0629582	0.120099	0.0283341	0.015191	0.0352846	0	0	0	0.022	0.216477	0.993823
TCGA-97-7553-01A-21R-2039-07	0.0681018	0	0.0394157	0.10556	0	0.141069	0.0254161	0	0	0	0.00454103	0	0.0191967	0.260449	0.0485455	0.141322	0.058566	0	0.054922	0	0.00226059	0.0306353	0.012	0.258868	0.979186
TCGA-49-6761-01A-31R-1949-07	0.0756218	0	0.0453488	0.146158	0	0.172438	0.0676065	0.0421299	0.00888969	0.0302552	0	0.0322053	0	0.122807	0.0888299	0.11344	0.00817095	0.0206262	0.0233261	0	0	0.0021465	0.014	0.239103	0.988951
TCGA-05-4382-01A-01R-1206-07	0.0374752	0	0.0739029	0.0477317	0	0.163557	0.0451923	0.00385575	0.0140466	0	0	0.00639532	0	0.202492	0.0571865	0.295885	0.00494795	0	0.0205909	0	0	0.0267418	0.043	0.167286	1.02161
TCGA-NJ-A4YG-01A-22R-A262-07	0.0499032	0	0.0616108	0.0643366	0	0.161776	0.0066072	0.0784075	0.0137059	0	0	0.0470732	0.0144173	0.0496541	0.0328537	0.165011	0.135221	0.0309389	0.0778363	0	0	0.0106471	0.006	0.301835	0.955577
TCGA-78-8662-01A-11R-2403-07	0.119567	0	0.0275162	0.122126	0	0.138165	0.0211201	0.11781	0	0	0	0.0276346	0.0046796	0.146259	0.114957	0.122768	0.0189678	0	0.0184301	0	0	0	0.067	0.136083	1.03475
TCGA-44-7672-01A-11R-2066-07	0.0359161	0.017936	0.0822739	0.0956786	0	0.17214	0.0723388	0	0.0497844	0	0	0.0353496	0.00979327	0.116965	0.0655355	0.107455	0.0566284	0.0131303	0.0645419	0	0	0.00453271	0.018	0.22363	0.988324
TCGA-55-8619-01A-11R-2403-07	0.056722	0.0305613	0.0497874	0.162659	0	0.115516	0.00709147	0.0456039	0.0299848	0	0	0.0269915	0.00833159	0.110888	0.0363423	0.205224	0.0174076	0.00426327	0.058855	0	0	0.0337714	0.007	0.280853	0.966767
TCGA-50-5939-01A-11R-1628-07	0.000126069	0.0692545	0.070706	0.028425	0	0.217686	0.0379591	0.00539699	0.00997778	0	0.01355	0	0.0099077	0.25767	0.0612883	0.160161	0.00318779	0.0115567	0.02462	0.0018598	0	0.0166675	0.026	0.200372	1.00605
TCGA-97-8552-01A-11R-2403-07	0.0284507	0.0433816	0.000307947	0.0719186	0	0.209227	0.00526263	0.0154063	0.00502339	0	0.022404	0	0.0561346	0.0336623	0.0284167	0.204915	0.177027	0.0186186	0.0750574	0	0	0.00478555	0.001	0.345532	0.938558
TCGA-55-7726-01A-11R-2170-07	0.107713	0	0.0843447	0.0548607	0	0.206682	0	0.0109765	0	0	0	0	0	0.0706344	0.0655077	0.0890675	0.258877	0	0	0.0359789	0.00166591	0.0136916	0.007	0.282588	0.966932
TCGA-L9-A5IP-01A-21R-A39D-07	0.0946661	0	0.177518	0.204562	0	0	0.0879403	0.0643819	0.0122496	0	0	0.0495922	0.00634248	0.121818	0.0267198	0.0368758	0	0.0117742	0.045849	0	0.0162875	0.0434231	0.001	0.37176	0.931792
TCGA-55-7995-01A-11R-2187-07	0.0410154	0.00396252	0	0.169625	0	0.11626	0.0378539	0.0332609	0.0415881	0.0179435	0	0	0.0159312	0.325055	0.120046	0.0630374	0	0	0.0144218	0	0	0	0	0.552311	0.835717
TCGA-91-6847-01A-11R-1949-07	0.0551202	0	0.0126903	0.124951	0	0.129029	0	0.0434737	0.0160809	0	0	0.142346	0.000867185	0.194762	0.0748046	0.0499009	0.0597821	0	0.0903063	0	0.00588491	0	0.382	0.0218729	1.08549
TCGA-64-1681-01A-11R-2066-07	0.0368506	0.0151413	0.027098	0.0272096	0	0.186113	0	0.0197144	0.029045	0	0.00814723	0	0.0098326	0.109479	0.125954	0.0669612	0.213826	0.0292361	0.0879157	0	0	0.00747573	0.006	0.293301	0.96178
TCGA-73-4659-01A-01R-1206-07	0.0660345	0	0.0840625	0.0314419	0	0.142488	0	0	0	0	0.00352983	0.00407612	0.00713348	0.151598	0.0055981	0.294837	0.0526583	0.0381936	0.0651807	0	0	0.0531686	0.002	0.332023	0.947058
TCGA-86-A4P8-01A-11R-A24X-07	0.0658101	0	0.00783496	0.109677	0	0.32283	0.0116084	0	0	0	0.0135231	0.0199706	0.0187383	0.114368	0.0383051	0.178349	0.0098549	0	0.0858472	0	0	0.00328306	0.001	0.347039	0.940189
TCGA-50-5045-01A-01R-1628-07	0.0615484	0	0.0661888	0.0881907	0	0.173921	0.0399964	0.0711801	0.0270395	0.0021988	0	0.00844428	0.0100093	0.0259134	0.0819786	0.123412	0.117829	0.0188849	0.0784042	0	0	0.00486092	0.023	0.208887	0.993379
TCGA-44-5643-01A-01R-1628-07	0.153788	0	0.0242401	0.157106	0	0.137618	0.0976714	0.00311622	0	0	0.0140783	0	0.0126535	0.12289	0.0943193	0.0986979	0.0396908	0.0148288	0.029302	0	0	0	0.002	0.335292	0.944388
TCGA-97-A4M7-01A-11R-A24X-07	0.0404236	0.0168921	0	0.0627438	0	0.251754	0	0.0224483	0.0619901	0	0	0.0821617	0.0499144	0.0356137	0.0435983	0.12125	0.0823553	0.00744569	0.118271	0	0	0.00313866	0.07	0.129563	1.02854
TCGA-86-8056-01A-11R-2241-07	0.160791	0	0.00367623	0.0664195	0	0.202548	0.0061445	0.00153991	0.0168907	0	0	0.0307217	0.030121	0.0804228	0.0441152	0.148098	0.0691755	0.0134484	0.109358	0	0.00782503	0.00870612	0.007	0.280246	0.964732
TCGA-50-5066-01A-01R-1628-07	0.0194272	0.0047208	0.0849359	0.153096	0	0.0833356	0.137589	0.0285971	0	0.0183638	0.000155119	0	0.00236448	0.088029	0.0817524	0.181115	0.0706326	0	0.0396332	0	0.00568279	0.000569701	0.023	0.208416	0.993649
TCGA-L4-A4E5-01A-11R-A24X-07	0.107195	0	0.0335821	0.110949	0	0.181441	0.00340271	0.0331167	0.0441488	0	0	0.0433492	0	0.221205	0.0646842	0.130102	0.00583992	0	0.0209843	0	0	0	0.028	0.192581	1.01128
TCGA-67-3773-01A-01R-0946-07	0.0820307	0	0.0645822	0.0758087	0	0.175655	0.0106614	0.0428934	0.011447	0.00173055	0	0.0299789	0.0012611	0	0.0848159	0.147033	0.158554	0	0.11091	0	0	0.00263831	0.001	0.344906	0.938628
TCGA-78-7146-01A-11R-2039-07	0	0.0255922	0	0.0335928	0	0.209706	0.107904	0	0	0	0	0.00526406	0	0.22688	0.0825577	0.189041	0.0305998	0.0410834	0	0.0424206	0	0.00535909	0.017	0.226347	0.997018
TCGA-86-8671-01A-11R-2403-07	0.0920126	0	0.0516672	0.128319	0	0.186362	0.012023	0.0511208	0.0582553	0	0.00813192	0.00233325	0	0.152704	0.104927	0.0864232	0.0135129	0	0.0494301	0	0	0.00277811	0.001	0.362255	0.934082
TCGA-62-A472-01A-11R-A24H-07	0.0653695	0	0.0282788	0.166139	0	0.143631	0.027331	0.0494768	0.0235594	0	0	0.0479918	0.00878476	0.0348561	0.0830626	0.116624	0.101793	0.00416208	0.0970454	0	0	0.00189461	0.013	0.245502	0.981277
TCGA-78-7152-01A-11R-2039-07	0.0478141	0.048764	0.0828465	0.130863	0	0.193486	0.0172799	0.0572594	0.0427629	0	0	0.0289991	0	0.112469	0.0639991	0.0659372	0.0491384	0	0.0519681	0	0	0.00641268	0.002	0.324662	0.950564
TCGA-44-7659-01A-11R-2066-07	0.0855317	0	0.162059	0.0528861	0	0.183826	0	0.0344675	0.029852	0	0	0.028919	0.00838655	0.0639991	0.0274225	0.124035	0.078802	0.0438119	0.0715737	0	0	0.00442757	0	0.393178	0.919161
TCGA-05-5715-01A-01R-1628-07	0.0668475	0	0.0219594	0.0488825	0	0.0623912	0	0.0114202	0.0244209	0	0	0	0	0.472094	0.0214607	0.20378	0	0	0.0577049	0	0	0.00903927	0	0.457471	0.894479
TCGA-55-A48Y-01A-11R-A24H-07	0.101089	0	0.176164	0.0500177	0	0.112808	0.0285785	0.0283716	0.028488	0.00622476	0	0.0185426	0	0.283187	0.0370238	0.080236	0	0.0109727	0.0232219	0	0	0.015074	0	0.393894	0.922584
TCGA-86-8054-01A-11R-2241-07	0.0420605	0	0.0011703	0.09223	0	0.222907	0.0492053	0.0196955	0	0	0.0312194	0	0.0082479	0.134904	0.0404662	0.145011	0.111471	0.0130013	0.067343	0	0	0.0210676	0.071	0.12792	1.02618
TCGA-44-2655-01A-01R-0946-07	0.142627	0	0.0957405	0.0350948	0	0.187644	0.0204053	0.037933	0.0179996	0	0	0.0145457	0.0053695	0.0329795	0.0262278	0.159421	0.141206	0.0058259	0.0559565	0	0.0139235	0.00710059	0	0.389174	0.920553
TCGA-78-7220-01A-11R-2039-07	0.161315	0	0.0231395	0.17715	0	0.114188	0.0477643	0.108448	0	0	0	0.019179	0.0018579	0.106778	0.0595747	0.078286	0.0513845	0	0.0413893	0	0.00417054	0.00537629	0.014	0.240489	0.987348
TCGA-91-6836-01A-21R-1858-07	0.0252962	0	0.0650617	0.148206	0	0.191427	0.102255	0.0333195	0	0	0	0.0254807	0.0105899	0.13793	0.0356962	0.115772	0.0379362	0.0321294	0.00599816	0.0130865	0	0.0198161	0.052	0.155237	1.01997
TCGA-05-4420-01A-01R-1206-07	0.236756	0	0.20363	0.0447447	0	0.124083	0	0	0.0242576	0	0	0.00888427	0	0.0411424	0.0144489	0.140529	0	0.00402816	0	0.013899	0	0.143598	0	0.461691	0.890856
TCGA-38-6178-01A-11R-1755-07	0.103581	0	0.0538459	0.0656345	0	0.206209	0	0.0143549	0.0164382	0	0	0.0182286	0.0196159	0.0804505	0.0516035	0.153977	0	0.072205	0.141106	0	0	0.00274933	0.008	0.274982	0.967438
TCGA-78-8640-01A-11R-2403-07	0.0525439	0	0.0584687	0.138996	0	0.126474	0.0287882	0.0807124	0.0114389	0	0.021384	0.0131898	0.00762488	0.216038	0.0904464	0.109711	0.00686943	0	0.0373144	0	0	0	0.027	0.197577	1.00675
TCGA-67-3774-01A-01R-0946-07	0.0842445	0	0.117323	0.0991884	0	0.216204	0	0.0203458	0.00457861	0	0	0.0566146	0.0246637	0.0204705	0.0653976	0.14872	0.0201278	0.0222695	0.0895843	0	0	0.0102675	0.001	0.351191	0.937716
TCGA-86-7701-01A-11R-2170-07	0.122347	0	0.239614	0.0766435	0	0.237908	0.0478744	0.0290675	0.0314097	0	0.0136422	0	0	0.0541308	0.0431318	0.0487503	0.0262694	0.0114619	0.0161509	0	0	0.00159788	0	0.423095	0.911817
TCGA-55-A48X-01A-11R-A24H-07	0.109873	0.156196	0.0529149	0.0757182	0	0.219175	0	0.0217119	0.0626425	0	0	0.0142672	0	0.104976	0.0335001	0.0717902	0.0320825	0	0.0379058	0	0	0.00724692	0	0.409945	0.91265
TCGA-55-8614-01A-11R-2403-07	0	0.0184006	0.0447319	0.088701	0	0.134157	0.0187296	0.0352312	0.0260963	0	0	0.0501582	0	0.272436	0.100604	0.0966616	0.0230638	0.0176962	0.0621449	0	0	0.011188	0.105	0.100171	1.05087
TCGA-44-A4SS-01A-11R-A24X-07	0.0382305	0	0.00673755	0.151912	0	0.266878	0.0980015	0	0	0	0.0343472	0	0.00156096	0.0912457	0.0750244	0.174373	0.0180222	0.00171508	0.0400072	0	0	0.00194477	0.027	0.198775	1.00601
TCGA-MP-A4SV-01A-11R-A24X-07	0.0468538	0	0.129579	0.133785	0	0.144733	0.072772	0.0265616	0.0638469	0	0.0403153	0	0	0.111962	0.0911868	0.092559	0.00506232	0.0103217	0.0281276	0	0	0.00233393	0.008	0.277689	0.97292
TCGA-97-8547-01A-11R-2403-07	0.00549325	0.00174809	0.00289957	0.0185721	0	0.0783621	0	0.038925	0.0495147	0	0.0188892	0	0	0.491743	0	0.15728	0.00856011	0.101819	0.026193	0	0	0	0	0.398824	0.932552
TCGA-O1-A52J-01A-11R-A262-07	0.00749457	0.0143949	0	0.00854021	0	0.0843826	0	0	0.0148493	0	0	0.036734	0.205737	0.0503705	0	0.384737	0.0222244	0.0746025	0.0934014	0	0.00253104	0	0.019	0.222497	0.998815
TCGA-44-6145-01A-11R-1755-07	0.103938	0	0.135686	0.191098	0	0.12745	0.102677	0.00832138	0.00530036	0	0.00309188	0.0125935	0.00634043	0.0449215	0.0827937	0.0793852	0.00332027	0.0225195	0.0472293	0	0	0.0233339	0	0.414719	0.909539
TCGA-64-1678-01A-01R-0946-07	0.152238	0	0.291731	0.108307	0	0.0388452	0.148391	0	0	0	0.0407846	0	0	0.021855	0.0178137	0.080821	0.0682976	0.00910808	0.01977	0	0	0.00203807	0	0.477145	0.882989
TCGA-49-4505-01A-01R-1206-07	0.125071	0	0.0710745	0.136261	0	0.109558	0.0188336	0.0318422	0.0188081	0	0	0.0436365	0.0233506	0.0259733	0.0642732	0.11611	0.0753999	0.0228933	0.102755	0	0	0.0141584	0	0.396155	0.917315
TCGA-44-7671-01A-11R-2066-07	0.209826	0	0.101064	0.0630098	0	0.117666	0	0.0713312	0.0152716	0	0	0.00339214	0	0.151532	8.93083e-05	0.164732	0	0.0552322	0.0430741	0	0.00181877	0.00195959	0	0.397833	0.918367
TCGA-44-2665-01A-01R-0946-07	0.00356461	0	0.00676339	0.0171491	0	0.236582	0.0143958	0	0	0	0.00538646	0	0.00409302	0.23697	0.00861246	0.21648	0.136319	0.0533972	0.0570874	0	0	0.00320019	0.014	0.239331	0.993215
TCGA-49-AARR-01A-11R-A41B-07	0.161334	0	0.112862	0.111656	0	0.128934	0	0.0473382	0.0184461	0	0	0.0608183	0.0118187	0.0803259	0.0156193	0.104192	0	0.00957305	0.130811	0	0	0.00627096	0	0.410998	0.911223
TCGA-55-8097-01A-11R-2241-07	0.106329	0	0.0747142	0.0696289	0	0.240736	0.00840436	0.0281229	0.0386323	0	0	0.0159544	0.0141079	0.0160825	0.0236598	0.143202	0.116759	0.0151261	0.08854	0	0	0	0.001	0.345263	0.939215
TCGA-97-7546-01A-11R-2039-07	0.0553371	0	0.00215914	0.117592	0	0.331667	0.0254869	0.0158545	0	0	0	0.0293568	0.0480539	0.0236014	0.0419783	0.098803	0.0554972	0.0315008	0.114602	0	0	0.0085093	0.168	0.0738862	1.05439
TCGA-55-7573-01A-11R-2039-07	0.178224	0	0.0805861	0.0452031	0	0.17756	0	0.0668021	0.0168032	0	0	0.0306331	0.00688503	0.0531761	0.0636067	0.0238321	0.162153	0.0191694	0.0711086	0	0	0.00425689	0	0.452519	0.891601
TCGA-97-A4M6-01A-11R-A24X-07	0.0812444	0	0	0.0941729	0	0.20796	0.000294532	0.033642	0.0923068	0	0	0.0364594	0.02289	0.0850168	0.0837799	0.0970231	0.0360182	0.0283033	0.0907342	0	0	0.0101547	0.032	0.187911	1.00781
TCGA-78-7537-01A-11R-2066-07	0.0698265	0	0.279233	0.131444	0	0.058397	0	0.0175201	0.0658633	0	0	0.0412958	0	0.0459815	0.00341462	0.148599	0.0498888	0.0250902	0.0564202	0	0	0.00702588	0	0.486212	0.87386
TCGA-75-6214-01A-41R-1949-07	0	0	0.00271377	0.114515	0	0.139958	0.0252232	0.0545597	0.021839	0	0	0.0143181	0	0.262248	0.0743652	0.163721	0.0393406	0.0267466	0.0329389	0	0	0.0275133	0.037	0.174945	1.02276
TCGA-86-8358-01A-11R-2326-07	0.107161	0	0.137778	0.106261	0	0.103771	0.0377022	0.0568804	0	0	0.022383	0.00594987	0	0.205436	0.062769	0.142249	0	0	0.0116592	0	0	0	0.001	0.346268	0.943137
TCGA-50-5936-01A-11R-1628-07	0.0593418	0	0.018537	0.0430748	0	0.163295	0.00927711	0.0156822	0.0234847	0	0.00251665	0	0	0.437866	0.0023426	0.130075	0	0.0701853	0	0.0155036	0	0.00881843	0.014	0.241101	1.01018
TCGA-78-7167-01A-11R-2066-07	0.149665	0	0.101008	0.120711	0	0.173358	0	0.0370086	0.0318232	0	0	0.041773	0.0192413	0.0568684	0.0541087	0.121601	0.0240895	0	0.0687446	0	0	0	0.013	0.248084	0.985534
TCGA-55-8513-01A-11R-2403-07	0.0573678	0.0274171	0.0582764	0.0206214	0	0.0707957	0	0.0370921	0.0163365	0	0	0.0116285	0	0.196468	0.0248884	0.30355	0.0896781	0.0193527	0.054311	0	0	0.0122157	0.002	0.336444	0.947013
TCGA-75-5125-01A-01R-1755-07	0.00419499	0	0.0154684	0.121091	0	0.164572	0.0597047	0.0522638	0.0110507	0	0.0321382	0	0.0225672	0.0129713	0.131949	0.153915	0.112858	0.0397592	0.0539495	0	0	0.0115467	0.052	0.155577	1.02127
TCGA-NJ-A4YI-01A-11R-A262-07	0.0398533	0	0.0264633	0.0220118	0	0.110947	0	0.0286955	0.0176869	0	0.0179785	0	0.110836	0.137562	0.0160707	0.267995	0.138904	0.00297406	0.039572	0	0.00585021	0.0165998	0.013	0.244306	0.984992
TCGA-05-5429-01A-01R-1628-07	0.205301	0	0.203995	0.0164122	0	0.213957	0	0.00568076	0.0130253	0	0	0.0182705	0.00453779	0.0618186	0.0270443	0.127498	0.0368969	0.00384618	0.0453763	0	0	0.0163397	0	0.504123	0.862928
TCGA-44-5645-01A-01R-A278-07	0.100851	0	0.039116	0.0159736	0	0.285973	0.0205285	0	0.00626283	0	0	0.01146	0.0365687	0.115451	0.0152135	0.0585681	0.190055	0.0289167	0.0750617	0	0	0	0.001	0.378565	0.925248
TCGA-55-6978-01A-11R-1949-07	0.0174564	0	0.00482268	0.230425	0	0.175667	0.103305	0.0134524	0.0112719	0	0.0344692	0	0.00753057	0.0868828	0.102743	0.11785	0.0752817	0	0.0188405	0	0	0	0.027	0.197407	1.01028
TCGA-86-8674-01A-21R-2403-07	0.150238	0	0.152438	0.0461754	0	0.0646943	0.0124537	0.12654	0.0124356	0	0	0.0361406	0	0.245202	0.0476235	0.0421313	0.000507107	0.049919	0.0135013	0	0	0	0	0.39614	0.921143
TCGA-78-7156-01A-11R-2039-07	0.0841518	0	0.0348059	0.0992561	0	0.241771	0	0.0380306	0.00258056	0	0	0.0689382	0.0271858	0.0505894	0.124926	0.0634859	0.00162435	0	0.162654	0	0	0	0.072	0.12727	1.03831
TCGA-62-8402-01A-11R-2326-07	0.0394121	0	0.00931046	0.114915	0	0.161084	0.0842247	0	0.0425978	0	0.0134913	0.00295926	0	0.254844	0.196288	0.047749	0.00180259	0	0.0291048	0	0	0.00221643	0.004	0.30705	0.968769
TCGA-71-6725-01A-11R-1858-07	0	0.0559538	0.0681511	0	0	0.0265472	0	0.032195	0	0.00460366	0	0.00799269	0.140277	0.0703493	0.0199067	0.319919	0.0817505	0.10979	0.032364	0	0.0215628	0.00863683	0.014	0.234762	0.991205
TCGA-44-5644-01A-21R-2039-07	0.224759	0	0.221957	0.118189	0	0.0169046	0.0911681	0.0218363	0	0	0	0	0	0.157532	0.013494	0.0669782	0	0.0328844	0.0057962	0	0	0.0285012	0	0.465475	0.888237
TCGA-97-A4M0-01A-11R-A24X-07	0.0331742	0	0.0198735	0.124227	0	0.265015	0.0192678	0.0309623	0.0510396	0	0	0.0268633	0.0407993	0.00190214	0.0720251	0.0958202	0.114349	0.026755	0.0720488	0	0	0.00587789	0.013	0.255028	0.979947
TCGA-50-7109-01A-11R-2039-07	0.126823	0	0.17877	0.143232	0	0.0692087	0.0523017	0.0376247	0.0125902	0	0	0.0321235	0.00787473	0.0821187	0.107873	0.0711503	0.0235164	0	0.0518353	0	0	0.00295751	0	0.497211	0.867098
TCGA-44-A4SU-01A-11R-A24X-07	0.170109	0	0.310388	0.0297219	0	0.122407	0	0.0739145	0.0297464	0	0	0	0	0.0987713	0.0600518	0.01414	0.0574237	0.0154745	0.0178518	0	0	0	0	0.572881	0.81995
TCGA-78-7145-01A-11R-2039-07	0.132881	0	0.0208649	0	0	0.205444	0.00283196	0.000137605	0.00909666	0	0	0	0.0501366	0.200073	0.0111441	0.126154	0.114092	0.0589091	0.0250181	0.0316038	0	0.0116131	0.014	0.231339	0.988767
TCGA-44-7670-01A-11R-2066-07	0.101832	0	0	0.0661272	0	0.139404	0.0280974	0.0328284	0.01524	0	0	0.0401382	0.0283687	0.302682	0.0780575	0.0620199	0.016581	0	0.0599159	0	0.0287078	0	0.027	0.195671	1.00836
TCGA-05-4396-01A-21R-1858-07	0.0336391	0	0.0161173	0.0674971	0	0.234705	0.0323577	0.0370732	0.0326864	0	0.0265663	0	0	0.134723	0.0872448	0.209443	0.0169614	0.0176014	0.0405276	0	0	0.0128566	0.138	0.0871375	1.04954
TCGA-95-8039-01A-11R-2241-07	0.0512958	0	0.0130751	0.0260789	0	0.270289	0.0282635	0.0374741	0.0454442	0	0	0.0160705	0.0193131	0	0.0436774	0.101293	0.193367	0.064074	0.0767983	0	0	0.0134857	0.001	0.363027	0.931473
TCGA-64-1676-01A-01R-0946-07	0.0799286	0	0.0840024	0.108912	0	0.0918106	0.054516	0.0102525	0.009894	0.00508516	0	0.0197665	0.0622848	0.11321	0.0451561	0.178904	0.0898803	0	0.045412	0	0	0.000984041	0.001	0.347913	0.937586
TCGA-95-8494-01A-11R-2326-07	0.0280558	0.00976353	0	0.0388644	0	0.114371	0.0594516	0.0258493	0.00329305	0	0	0.0354616	0.141267	0.0480185	0	0.124636	0.162581	0.11174	0.0819388	0	0.000233387	0.0144755	0.014	0.242334	0.9781
TCGA-50-8459-01A-11R-2326-07	0.106545	0	0.107598	0.0611943	0	0.0816247	0.0340492	0	0.0225668	0	0	0	0.0542205	0.109653	0.0274465	0.175842	0.111632	0.013134	0.0675484	0	0	0.026946	0.001	0.352472	0.936231
TCGA-86-7953-01A-11R-2187-07	0.0865654	0	0.023801	0.0745051	0	0.263035	0.0459609	0.0348555	0.0248905	0	0	0.00834224	0.0576389	0.102012	0.0289763	0.142199	0.0410207	0.0419081	0	0.00327211	0	0.021018	0.013	0.2554	0.978018
TCGA-78-7150-01A-21R-2039-07	0.107159	0	0.0337793	0.12022	0	0.154763	0.038141	0.0696066	0.0224907	0	0.00790674	0.0107429	0	0.169371	0.0700859	0.144137	0	0.0513659	0	0	0	0.000229641	0.017	0.224803	0.995282
TCGA-78-7148-01A-11R-2039-07	0.0854041	0	0.0548848	0.20862	0	0.157758	0.0447306	0.0327565	0.0151925	0	0	0.0220908	0.0133898	0.0664419	0.0606019	0.112964	0.0693274	0.000372811	0.0554643	0	0	0	0.013	0.255503	0.978946
TCGA-44-3917-01A-01R-A278-07	0.020061	0.0123397	0.0408514	0.145224	0	0.0568244	0.216795	0.0116624	0	0.00110205	0.0224805	0	0.0230921	0.0173351	0.0579329	0.193921	0.105985	0.00405334	0.0445816	0	0.00736622	0.0183934	0.049	0.157277	1.00831
TCGA-55-A4DF-01A-11R-A24H-07	0.0907324	0	0.042236	0.0870971	0	0.136063	0.0463409	0.0403414	0.0355187	0	0.0138422	0	0	0.23902	0.155153	0.0768043	0.000574194	0	0.0362774	0	0	0	0.02	0.21802	1.00322
TCGA-50-5068-01A-01R-1628-07	0.0119136	0.0645688	0.0546826	0.128292	0	0.119797	0.0129875	0.0524506	0.00975671	0.044274	0	0.0295943	0.00873263	0.0344698	0.10744	0.13729	0.147449	0	0.0363013	0	0	0	0.014	0.242303	0.983135
TCGA-49-4514-01A-21R-1858-07	0.0916578	0	0.0109255	0.165246	0	0.0933666	0.121144	0.0606773	0.0165894	0	0	0.0926668	0.0140137	0.0936085	0.0732185	0.0630537	0.00406694	0	0.0950109	0	0	0.00475459	0.041	0.169592	1.01903
TCGA-35-4122-01A-01R-1107-07	0.0255756	0	0.0502678	0.145317	0	0.0995438	0.0344185	0.0664551	0	0	0	0.0686239	0.0223685	0.0294169	0.0687863	0.214424	0.0779854	0	0.0639678	0	0.0196798	0.0131694	0.066	0.138765	1.0212
TCGA-86-8281-01A-11R-2287-07	0.0929577	0	0.241996	0.0645317	0	0.150993	0.0148574	0.0365438	0.0459216	0	0	0.0240898	0.012412	0.0571567	0.0325066	0.0998756	0.0656634	0.0156406	0.0448546	0	0	0	0	0.468707	0.882978
TCGA-50-5066-02A-11R-2090-07	0.0690432	0	0.082617	0.117186	0	0.225531	0.074934	0.0244815	0	0	0.0282306	0	0.0203623	0.0681258	0.0867529	0.177395	0.00714857	0	0.0181916	0	0	0	0.019	0.22259	0.993425
TCGA-97-8177-01A-11R-2287-07	0.0501935	0	0.0457097	0.0659773	0	0.120273	0	0.0501925	0.0328261	0	0	0.0320735	0.0211374	0.0903083	0.0132641	0.174074	0.209005	0.0312324	0.0342161	0.0156741	0	0.0138434	0.014	0.23247	0.98465
TCGA-91-6829-01A-21R-1858-07	0.208364	0	0.0216578	0.0624037	0	0.102912	0	0	0.0164154	0	0	0.0663144	0.00422186	0.189123	0.00979043	0.112018	0.014743	0.00824372	0.1743	0	0	0.00949204	0.002	0.33141	0.947151
TCGA-44-4112-01A-01R-1107-07	0.0714866	0	0.133572	0.101856	0	0.147203	0.0494168	0.0068773	0	0	0.0116246	0	0.0127312	0.0516364	0.0312262	0.150125	0.0767261	0.0823312	0.0505871	0	0	0.0226009	0.003	0.318738	0.950202
TCGA-53-7624-01A-11R-2066-07	0.13137	0	0.0813401	0.11022	0	0.0513663	0.03894	0.0499383	0.0326386	0	0	0.0387051	0	0.172905	0.154606	0.0970788	0	0.0407561	0	0	0.000136652	0	0.001	0.375261	0.931
TCGA-55-8208-01A-11R-2241-07	0.0576538	0	0.104647	0.0769542	0	0.11194	0.0334178	0.0401327	0.0414259	0	0	0.0309028	0.00147604	0.185029	0.115799	0.116965	0.021092	0	0.0414253	0	0	0.0211389	0.006	0.303801	0.959699
TCGA-50-8460-01A-11R-2326-07	0.0111001	0.0130219	0.18252	0.0854953	0	0.147355	0.00762822	0.0305089	0.0522364	0	0	0.0257442	0.07867	0.0210233	0	0.0638575	0.0997648	0.0755115	0.105563	0	0	0	0.003	0.315015	0.953422
TCGA-55-6543-01A-11R-1755-07	0.13728	0	0.0645791	0.0495603	0	0.136555	0	0.0117632	0.0131749	0	0	0.0203071	0.0223707	0.141068	0.032042	0.241583	0.0131381	0	0.0824969	0	0	0.0340815	0.001	0.359259	0.93384
TCGA-J2-A4AG-01A-11R-A24H-07	0.170017	0	0.0661548	0.0637171	0	0.238428	0.0447083	0.0180632	0.0141878	0	0	0.0198366	0.0205758	0.0543126	0.025335	0.0811399	0.0961368	0.0512083	0.0333817	0	0	0.00279765	0	0.427686	0.903332
TCGA-93-7348-01A-21R-2039-07	0.219619	0	0.156822	0.0648759	0	0.151747	0.019942	0	0.0337841	0	0	0	0	0.230328	0.0386131	0.064804	0.000133287	0	0.000751054	0.0142966	0	0.00428367	0	0.478974	0.877682
TCGA-49-4501-01A-01R-1206-07	0.0992426	0	0.106553	0.0754204	0	0.241615	0.0100891	0.046375	0.0316714	0.00421119	0	0.0220893	0.0162908	0.033593	0.0197993	0.107756	0.0335351	0.0845831	0.0611612	0	0	0.00601397	0.001	0.36834	0.930303
TCGA-49-AAR4-01A-12R-A41B-07	0.0554394	0	0.0279593	0.473444	0	0	0.0595241	0.0686047	0.0364144	0	0	0	0	0.0931357	0.0539415	0.102146	0.00792153	0	0.00841404	0.00867884	0	0.00437592	0.041	0.170201	1.04001
TCGA-55-6642-01A-11R-1858-07	0	0.00446846	0.16909	0.141619	0	0.199586	0.0954755	0	0.00181914	0	0.040329	0	0	0.176953	0.0292526	0.0938384	0	0.0114805	0.0346815	0	0	0.00140678	0.008	0.275047	0.975326
TCGA-05-5423-01A-01R-1628-07	0.056286	0	0.0203971	0.0350174	0	0.14829	0.0315106	0.0339219	0.0251794	0.00780217	0	0.000853895	0.0112293	0.0334694	0.00662079	0.168212	0.20746	0.0463886	0.075781	0	0.0574186	0.0341633	0	0.438901	0.900894
TCGA-05-4432-01A-01R-1206-07	0.0792274	0	0.169517	0.0987669	0	0.0942588	0.0242323	0.0209709	0.0435457	0	0	0.0187057	0	0.226611	0.0812489	0.0929264	0	0	0.0284399	0	0	0.0215484	0.001	0.34848	0.943472
TCGA-55-8512-01A-11R-2403-07	0.0976565	0	0.0353561	0.145072	0	0.128567	0	0.0076115	0	0	0.0294578	0.0387506	0.0751748	0.122995	0.000954809	0.168392	0	0.0453978	0.044183	0	0	0.060431	0.058	0.148469	1.02052
TCGA-05-4398-01A-01R-1206-07	0.0852691	0	0.121972	0.101956	0	0.122757	0.0239503	0.0338094	0.00890734	0	0	0	0.0385187	0.0915584	0.0909218	0.17592	0.0707592	0	0	0.0176974	0.00748677	0.00851595	0.002	0.32374	0.949936
TCGA-05-4433-01A-22R-1858-07	0.0226844	0.0053276	0	0.0987286	0	0.161585	0.0253302	0.0214001	0.00638726	0	0	0.00594085	0	0.308628	0.0971049	0.144015	0.0236092	0	0.0590564	0	0	0.0202024	0.001	0.376693	0.929803
TCGA-62-8394-01A-11R-2326-07	0.0612964	0	0.00818658	0.0421097	0	0.215789	0	0.0322728	0.0419327	0	0	4.2355e-05	0	0.274785	0.0734539	0.115242	0	0.102163	0.0327272	0	0	0	0.069	0.132673	1.04243
TCGA-55-7911-01A-11R-2170-07	0.076964	0	0.00350407	0.127035	0	0.243372	0.0909117	0.0773234	0	0	0.0217764	0.0261066	0.0154995	0	0.0254059	0.129069	0.000239865	0.125548	0.0298078	0	0.00319093	0.0042465	0.056	0.150694	1.02986
TCGA-50-5942-01A-21R-1755-07	0.0967053	0	0.214747	0.102767	0	0.241079	0	0.0251166	0.00904833	0	0	0.00589583	0.0215361	0	0.0423086	0.0632838	0.0721381	0.00654538	0.09883	0	0	0	0	0.465699	0.884434
TCGA-44-7662-01A-11R-2066-07	0.144071	0	0.0628217	0.0892457	0	0.0894408	0.0275306	0.0195631	0.0215224	0	0.00413846	0.0108866	0	0.221589	0.0614733	0.212176	0	0	0.0221616	0	0	0.0133792	0.007	0.284212	0.970336
TCGA-55-A490-01A-11R-A466-07	0.0776202	0	0.123715	0.0885587	0	0.130853	0.00661125	0	0.0653511	0	0	0	0	0.269259	0.0264851	0.10194	0.0669276	0	0	0.031202	0	0.0114768	0.003	0.312761	0.959419
TCGA-97-7941-01A-11R-2187-07	0.183242	0	0.0184931	0.0704221	0	0.184901	0	0.0268441	0.0544244	0	0	0.0305249	0.0134733	0.0257097	0.0430494	0.147192	0.122889	0	0.0788346	0	0	0	0	0.402241	0.914738
TCGA-97-8175-01A-11R-2287-07	0.00615845	0.0355806	0	0.0294391	0	0.108239	0	0	0.0144997	0	0	0.0446127	0.0205299	0.177664	0.0226227	0.160238	0.264914	0.0279789	0.0628344	0	0	0.0246883	0.007	0.290423	0.966874
TCGA-99-7458-01A-11R-2039-07	0.0947174	0	0.0234053	0.145473	0	0.231152	0.0153721	0.0494491	0.0302377	0	0	0.0249423	0.011341	0.0797837	0.0510264	0.0688646	0.0803362	0.0387655	0.0537873	0	0	0.00134622	0.003	0.312974	0.955187
TCGA-55-8507-01A-11R-2403-07	0.0393799	0	0.0447512	0.0734504	0	0.081417	0.00852632	0.0490788	0	0	0	0.0439947	0.013142	0.31649	0.0360762	0.193337	0	0.0548212	0.00324171	0.0195496	0	0.0227433	0.026	0.201735	1.01459
TCGA-38-4629-01A-02R-1206-07	0.011368	0	0.0505679	0.142651	0	0.0936831	0.0802105	0.00781285	0.00762037	0	0.0157103	0	0.0665225	0.130921	0.0912115	0.232281	0.0210329	0	0.0422687	0	0	0.00613893	0.041	0.169928	1.01147
TCGA-86-7954-01A-11R-2187-07	0.0662983	0	0.0159003	0.0709411	0	0.191496	0.00841349	0.0443188	0.0400311	0	0	0.026671	0.0108793	0.0506416	0.175369	0.166556	0.0149909	0.0292968	0.0831675	0	0	0.00502985	0	0.461431	0.886447
TCGA-97-A4M3-01A-11R-A24X-07	0.101625	0	0.102531	0.0609248	0	0.204424	0	0.0763993	0.0260963	0	0	0.0450902	0.0483581	0.0402735	0.0238717	0.159812	0.0370904	0.0262683	0.0275842	0.00603613	0.00999818	0.00361611	0.017	0.225685	0.991391
TCGA-55-6984-01A-11R-1949-07	0.0424222	0.0969447	0.0502442	0.0744206	0	0.305274	0	0	0.0739086	0	0	0.0299753	0.00116117	0.0717628	0.00338325	0.0806093	0.0442148	0.0500773	0	0.0352962	0	0.0403051	0.007	0.286107	0.96913
TCGA-55-8205-01A-11R-2241-07	0.087086	0	0.048948	0.176247	0	0.122945	0.0697735	0.0438713	0	0	0	0.0287689	0.027675	0.0494807	0.070814	0.194014	0.0592701	0	0.010059	0	0.00633284	0.00471451	0.003	0.311204	0.954116
TCGA-55-7816-01A-11R-2170-07	0.0227595	0	0.00506369	0.11535	0	0.0994585	0.0368633	0	0.00176274	0.000881794	0	0.00015907	0.13438	0.00329063	0.119529	0.383208	0.0191379	0	0.0560006	0	0	0.00215612	0.002	0.327314	0.950103
TCGA-99-AA5R-01A-11R-A39D-07	0.0929957	0.025704	0.0637938	0.124522	0	0.297051	0	0.012672	0	0	0	0.0620775	0.00694703	0.133432	0.0438571	0.0730923	0.0247654	0	0.0353316	0	0	0.00375799	0.002	0.332659	0.949173
TCGA-55-7727-01A-11R-2170-07	0.171187	0	0.0471377	0.0423616	0	0.298208	0.0443588	0.0111195	0	0.00315572	0.0101201	0	0	0.0560949	0.0879841	0.138468	0.0301203	0.0181019	0.0395702	0	0	0.00201236	0.001	0.353704	0.937134
TCGA-86-A456-01A-11R-A24H-07	0.0866899	0	0.00996445	0.0499604	0	0.176489	0.00366335	0.0452384	0.000456773	0	0	0.00335479	0	0.177338	0.0691546	0.310969	0	0.036868	0	0.0262682	0	0.00358581	0.013	0.252264	0.986047
TCGA-69-7765-01A-11R-2170-07	0.102551	0	0.188161	0.0832186	0	0.14844	0.0476628	0.00712331	0	0	0.0363883	0	0.00263414	0.0743291	0.0601864	0.0427531	0.148247	0.0305522	0.0250135	0	0	0.00274057	0	0.414905	0.909751
TCGA-64-5774-01A-01R-1628-07	0.18432	0	0.222625	0.0773671	0	0.183798	0	0.0304937	0.035372	0	0	0.0383973	0	0.127099	0.000904554	0.0797889	0	0.00920921	0	0	0	0.0106258	0	0.467384	0.887004
TCGA-05-4427-01A-21R-1858-07	0.0955667	0	0.0846756	0.102477	0	0.119896	0.055348	0.0369348	0	0	0	0.0109073	0.042668	0.0495296	0.0679866	0.155059	0.116324	0.00551532	0.0543531	0	0	0.00275799	0.002	0.328077	0.94533
TCGA-50-6591-01A-11R-1755-07	0.0090006	0	0	0.0372874	0	0.34359	0	0.0220182	0.0161346	0	0	0.0105964	0	0.481336	0.00639225	0	0.00272183	0	0	0.0709231	0	0	0.068	0.134515	1.07714
TCGA-05-4397-01A-01R-1206-07	0.0955864	0	0.0456623	0.0523856	0	0.0689054	0.0308025	0.022695	0.0283452	0	0.0189546	0	0.00108573	0.0817745	0.122157	0.246883	0.0183772	0.0883187	0.0558336	0	0	0.0222326	0.011	0.266227	0.975789
TCGA-93-7347-01A-11R-2187-07	0.0550175	0	0.0720034	0.127344	0	0.163491	0.0245026	0.037275	0.0541854	0	0	0.0208391	0	0.181654	0.0365225	0.103557	0.036611	0.0299342	0.0570637	0	0	0	0.002	0.320986	0.950872
TCGA-05-4395-01A-01R-1206-07	0.0142668	0	0.0176207	0.0685377	0	0.173711	0.0887237	0.054516	0	0	0.0102321	0.0521149	0.0437097	0.0422924	0.100903	0.138499	0.0857215	0.0418363	0.0611964	0	0	0.00611888	0.034	0.180781	1.00627
TCGA-44-8117-01A-11R-2241-07	0.0914746	0	0.0643542	0.0686628	0	0.112332	0.0452031	0.0331044	0.0278755	0	0.00834159	0	0	0.27541	0.0733386	0.143248	0	0	0.0547369	0	0	0.00191785	0.001	0.372313	0.929435
TCGA-49-6742-01A-11R-1858-07	0.0895925	0	0.025366	0.0924635	0	0.0920932	0	0.0722553	0	0	0	0.071502	0	0.123084	0.0196715	0.232534	0	0.0613918	0.0863479	0	0	0.0336984	0.027	0.194946	1.00077
TCGA-86-8280-01A-11R-2287-07	0.0545032	0	0.0614981	0.0612361	0	0.235073	0.0096543	0.06614	0.0464769	0	0	0.00144503	0.0108173	0.14494	0.0694979	0.0957957	0.0934553	0.00580039	0.0423096	0	0	0.00135684	0.023	0.211445	0.996721
TCGA-44-6147-01A-11R-A278-07	0.116437	0	0.138039	0.0322203	0	0.206394	0.0197041	0	0	0.0195827	0	0	0	0.231823	0.0506408	0.0965614	0	0.0269893	0.0616081	0	0	0	0.001	0.353457	0.939394
TCGA-MP-A4SY-01A-21R-A24X-07	0.166465	0	0.0201516	0.0283752	0	0.103732	0.00889231	0	0.0303938	0	0.00689077	0	0	0.395116	0.0118685	0.159369	0.0326713	0	0.0332306	0	0	0.00284318	0.001	0.374404	0.935957
TCGA-86-7955-01A-11R-2187-07	0.324433	0	0.0217057	0	0	0.116048	0	0	0.0132015	0.02935	0.0815943	0	0	0.102732	0.115459	0.0881124	0	0.0388138	0.0685504	0	0	0	0.002	0.341526	0.94902
TCGA-L9-A8F4-01A-11R-A39D-07	0.0786644	0	0.142876	0.185722	0	0.0702318	0.0614704	0.0206508	0.109147	0	0	0.00653613	0	0.164549	0.0395427	0.110265	0	0	0.0103447	0	0	0	0	0.388117	0.923346
TCGA-49-4507-01A-01R-1206-07	0.0127237	0	0.0860466	0.28948	0	0	0.143552	0.0278383	0.0269994	0.0437521	0	0.0617461	0	0.0558665	0.0583577	0.109247	0.0113799	0	0.0730111	0	0	0	0.022	0.213545	1.00433
TCGA-55-7725-01A-11R-2170-07	0.0904753	0	0.00107144	0.0783983	0	0.259063	0.0532039	0.0508507	0	0.014126	0.0196259	0	0.00149144	0.0886838	0.110261	0.0961539	0.0481721	0.0155009	0.0707327	0	0	0.00218936	0.002	0.342947	0.941544
TCGA-55-8511-01A-11R-2403-07	0.111465	0	0.127944	0.119164	0	0.202602	0	0.0323433	0.0408492	0	0	0.0249822	0.00619661	0.0864849	0.100477	0.0936268	0.0314005	0	0.0181497	0	0	0.00431388	0.001	0.379326	0.927686
TCGA-55-A494-01A-11R-A24X-07	0.0442635	0	0.0153488	0.158142	0	0.147602	0.0111527	0.093837	0.00697123	0	0	0.0338908	0.0233716	0.120252	0	0.172731	0.0612747	0.111162	0	0	0	0	0.643	-0.00610451	1.08875
TCGA-L9-A50W-01A-12R-A39D-07	0.103603	0	0.122299	0.0240652	0	0.199752	0	0.031233	0.0296861	0	0	0.0359539	0.00632794	0.0354884	0.0621556	0.0447585	0.194899	0	0.107461	0	0	0.00231723	0	0.445757	0.895359
TCGA-44-3919-01A-02R-1107-07	0.103876	0	0.0286858	0.0976042	0	0.159377	0.0310242	0.0469274	0.0250808	0	0	0.006113	0	0.0810402	0.113425	0.115176	0.109473	0	0.0764876	0	0	0.00571044	0.013	0.25192	0.977769
TCGA-55-1594-01A-01R-0946-07	0.111478	0	0.0257743	0.0972309	0	0.223153	0	0.0168224	0	0	0	0.0560632	0.00736691	0.0668966	0.119075	0.140892	0.0431665	0	0.0802178	0	0	0.0118634	0.028	0.192136	1.00591
TCGA-55-8514-01A-11R-2403-07	0.0573605	0	0.0539183	0.0257274	0	0.167998	0	0.0562627	0.0332796	0	0.00996183	0.00392024	0.0963997	0.114224	0.0407957	0.213187	0.00893271	0.0668857	0.0494409	0	0	0.00170521	0.013	0.245306	0.979427
TCGA-91-6849-01A-11R-1949-07	0.0936544	0	0.169167	0.114844	0	0	0.039053	0.0164196	0.0328217	0	0.0109019	0	0	0.348099	0.00455015	0.0962378	0.00880626	0.0274593	0.0260528	0	0	0.0119335	0.001	0.376737	0.934006
TCGA-69-7979-01A-11R-2187-07	0.0792924	0	0.0796134	0.085873	0	0.062924	0.0270153	0.020319	0	0	0.00420926	0.0228291	0	0.229498	0.091036	0.213065	0.0116329	0.00544941	0.0646967	0	0	0.00254643	0.013	0.249311	0.985303
TCGA-44-6775-01A-11R-A278-07	0.0995741	0	0.0913522	0	0	0.134252	0.00580879	0	0.0153801	0	0	0.0141842	0.026014	0.260036	0.0203772	0.117034	0.0932252	0.0156715	0.0886194	0	0.0080751	0.0103958	0.007	0.290645	0.966119
TCGA-44-3918-01A-01R-A278-07	0.034376	0	0.0189325	0.0844052	0	0.257998	0.115072	0.00178347	0	0.024398	0	0	0	0.0921251	0.0472103	0.177832	0.0158518	0.0795354	0.0338348	0	0.00988073	0.00676389	0.121	0.0939327	1.04198
TCGA-44-3917-01B-02R-A277-07	0.0893505	0	0	0	0	0.35166	0.06585	0.00452952	0	0.00429158	0.0368899	0	0	0	0.0619036	0.352117	0	0.0197791	0	0	0.0110676	0.00256152	0.067	0.136091	1.03152
TCGA-62-8395-01A-11R-2326-07	0.225148	0	0.0694531	0.0893336	0	0.140091	0	0.0216756	0.00534863	0	0	0.0145013	0.0221675	0.112806	0.021315	0.14737	0.0474841	0.0111156	0.0721901	0	0	0	0	0.424289	0.904795
TCGA-44-2662-01A-01R-0946-07	0.0589518	0	0.0546657	0.0347049	0	0.16537	0.030804	0	0.0200894	0	0.0319606	0	0.115669	0.164198	0.0359746	0.168969	0.028726	0	0	0.0210818	0.0183725	0.0504634	0.014	0.234166	0.986022
TCGA-L9-A743-01A-43R-A39D-07	0.128474	0	0.0964259	0.111424	0	0.178765	0.0629848	0.0157548	0.0118255	0	0	0	0.0140789	0.0633807	0.0492433	0.103126	0.0519757	0.0676434	0.0302934	0	0	0.0146043	0.002	0.342909	0.940951
TCGA-97-A4M5-01A-11R-A24X-07	0.047412	0	0.0365176	0.0929137	0	0.126396	0	0.00337974	0.00946578	0	0.045144	0.0132164	0.00949005	0.16043	0.0535699	0.261509	0.00624358	0.0187044	0.107696	0	0	0.00791154	0.022	0.214794	0.994519
TCGA-50-5049-01A-01R-1628-07	0.0615557	0	0.166361	0.180962	0	0.107159	0.0341077	0.0327354	0.0200155	0	0	0	0.0169613	0.124303	0.0711962	0.153956	0.017754	0	0.005338	0	0.00759465	0	0.001	0.360118	0.936461
TCGA-62-A46Y-01A-11R-A24H-07	0.0702579	0	0.0143573	0.097663	0	0.136565	0.00718942	0.0502151	0.00752524	0	0	0.0124985	0.054238	0.0753277	0.0657442	0.157352	0.185689	0	0.0631027	0	0	0.00227482	0.051	0.156251	1.01244
TCGA-05-5428-01A-01R-1628-07	0.00680972	0.00448607	0	0.075148	0	0.0843208	0	0	0.0325177	0.000732164	0	0.0347825	0.00270248	0.0827287	0.0354693	0.334959	0.130288	0	0.138097	0	0.00365077	0.0333078	0.001	0.345453	0.94075
TCGA-44-6147-01A-11R-1755-07	0.197041	0	0.135019	0.0554316	0	0.153382	0.0195208	0	0.0474753	0.00973624	0	0	0	0.159464	0.0587086	0.0842471	0	0.0100315	0.067047	0	0	0.00289564	0	0.441668	0.896661
TCGA-49-AARE-01A-11R-A41B-07	0.143084	0	0.102895	0.0722548	0	0.0806115	0.0545712	0.0670992	0.0449065	0	0.0486358	0	0	0.200118	0.0955904	0.0606489	0	0.00253493	0.0270499	0	0	0	0	0.418919	0.90748
TCGA-78-7159-01A-11R-2039-07	0.149197	0	0.216475	0.0860874	0	0.180598	0.00677873	0.00312216	0.00853447	0	0	0.0653641	0.0147672	0.125251	0.0447718	0.0308808	0	0.0134413	0.0230371	0	0	0.0316946	0	0.50424	0.862834
TCGA-55-7281-01A-11R-2039-07	0.0492353	0	0.0238421	0.0723475	0	0.162243	0.0339493	0.022759	0.0193346	0	0.0059418	0.00158422	0.0645577	0.107118	0.0712764	0.0632353	0.217213	0.0329322	0.0511492	0	0.00128118	0	0.001	0.35835	0.933287
TCGA-67-6217-01A-11R-1755-07	0.0334205	0.0288741	0.0881127	0.153281	0	0.219381	0.0381933	0.00732391	0.0340441	0	0.0116968	0	0.0145224	0.0129941	0.0612602	0.0606454	0.160654	0.0220604	0.0447291	0	0	0.00880606	0.007	0.287972	0.96468
TCGA-MN-A4N5-01A-11R-A24X-07	0.0954529	0	0.0836495	0.19389	0	0.0763941	0.0771089	0.0781027	0.032729	0	0.00386329	0.00706999	0.00300814	0.0929253	0.113431	0.0880557	0.0327218	0	0.0215976	0	0	0	0.002	0.340841	0.944265
TCGA-55-7724-01A-11R-2170-07	0.0639076	0	0.0408677	0.074811	0	0.135455	0.0500823	0	0	0.0124266	0.0348873	0	0	0.147425	0.103287	0.146328	0.0725013	0.0363652	0.0431542	0	0	0.0385014	0.019	0.222758	0.990308
TCGA-MN-A4N1-01A-11R-A24X-07	0.143427	0	0.0249571	0.0449964	0	0.120818	0	0.0342954	0.0232818	0	0.0710948	0	0	0.358252	0.0096627	0.129919	0	0.0285161	0	0.0107795	0	0	0.003	0.315325	0.962009
TCGA-69-A59K-01A-11R-A262-07	0.045249	0	0.123625	0.147977	0	0.102861	0.122218	0.00675436	0.000117109	0	0.0283791	0	0.00355349	0.0720175	0.0941219	0.131183	0.0941228	0	0.0261078	0	0	0.001713	0.006	0.295349	0.960693
TCGA-44-6775-01A-11R-1858-07	0.141087	0	0.0835098	0.0362574	0	0.102529	0.0127708	0.00355694	0.0302442	0	0	0.00924751	0.0229587	0.196943	0.0240415	0.134686	0.0946087	0.0206753	0.0735769	0	0	0.0133076	0.001	0.352711	0.937104
TCGA-99-8028-01A-11R-2241-07	0.0888069	0	0.0776611	0.136988	0	0.184544	0.0618273	0.00861993	0.0223676	0	0	0.0127682	0	0.122425	0.0881604	0.117202	0.0267269	0	0.0477868	0	0	0.00411645	0.008	0.276886	0.969891
TCGA-49-4506-01A-01R-1206-07	0.0336649	0.00133246	0.0194481	0.332401	0	0.0566912	0.0930328	0.0444339	0.012251	0	0	0.0334285	0.00323401	0.0667416	0.0825314	0.12322	0.0842575	0.000802597	0.00561816	0	0	0.0069108	0.047	0.159461	1.02905
TCGA-44-2668-01A-01R-0946-07	0.0357257	0	0.0284972	0.0837385	0	0.133181	0.0990994	0	0	0	0.00827264	0.0131717	0.0132718	0.328662	0.0679175	0.0616823	0	0.00820866	0	0.0988223	0	0.0197498	0.012	0.263213	0.984309
TCGA-91-8497-01A-11R-2403-07	0.125017	0	0.257585	0.0854663	0	0.120018	0.00309376	0.0405896	0.0430269	0	0	0.0181177	0.0116665	0.0248796	0.00911736	0.0891492	0.107867	0.0067988	0.0505517	0	0	0.00705524	0	0.508898	0.860245
TCGA-73-4670-01A-01R-1206-07	0.139776	0	0.146427	0.0632493	0	0.136444	0.00622599	0.0503204	0.0259337	0	0	0	0.00817139	0.132159	0	0.0926231	0	0.121464	0	0.0353053	0.00713008	0.0347707	0	0.422901	0.905743
TCGA-44-3396-01A-01R-1206-07	0.0685273	0	0.0680242	0.0992037	0	0.164734	0.029829	0	0	0.00182251	0.0298314	0	0	0.202045	0.110313	0.138747	0.0317707	0	0	0.0236087	0	0.0315437	0.025	0.20396	1.00425
TCGA-38-4627-01A-01R-1206-07	0.0808493	0	0.0372491	0.0586126	0	0.231886	0	0	0.0137619	0	0	0.025371	0.0272893	0.0934472	0.0404078	0.284568	0.0127925	0	0.0714358	0	5.33339e-05	0.0222767	0.007	0.280303	0.966715
TCGA-55-A57B-01A-12R-A39D-07	0.0262496	0.0165386	0	0.0226705	0	0.206035	0.0105782	0.0120899	0.0236142	0	0	0.033198	0.0328957	0.0547879	0.0158428	0.148424	0.225869	0.0598078	0.0966609	0	0	0.0147378	0.013	0.253775	0.975224
TCGA-55-8616-01A-11R-2403-07	0.267525	0	0.020012	0.126734	0	0.273145	0.0034096	0	0.0342036	0	0	0	0.0151574	0.0465607	0.0300456	0.12722	0	0.0125765	0.0367285	0	0	0.00668278	0	0.402099	0.917539
TCGA-55-8089-01A-11R-2241-07	0.103312	0	0.0497862	0.142053	0	0.0818632	0.0458275	0.0429925	0	0.0370855	0	0.0628659	0.00215435	0.079243	0.136314	0.0971148	0.0363109	0	0.0779993	0	0	0.00507803	0.006	0.300509	0.961833
TCGA-44-2668-01B-02R-A277-07	0.0538011	0	0.00306276	0	0	0.226438	0.101911	0	0	0	0.0894244	0	0.0255025	0.179672	0.148461	0.0411005	0.00536533	0	0	0.0575254	0.0183858	0.0493492	0.013	0.246259	0.987749
TCGA-NJ-A7XG-01A-12R-A39D-07	0.0664215	0	0.0620468	0.0356678	0	0.266103	0	0.0182784	0.0354846	0	0	0.0718547	0.0077547	0	0.0096545	0.0950723	0.104771	0.096161	0.1306	0	0	0.000129736	0.056	0.150397	1.01781
TCGA-49-AAQV-01A-11R-A39D-07	0.183508	0	0.0518728	0.0795333	0	0.173143	0.00661937	0.0202245	0.0833377	0	0	0.00319362	0	0.222256	0.053759	0.0679758	0.0102094	0.022998	0.0213684	0	0	0	0	0.428694	0.902876
TCGA-55-8091-01A-11R-2241-07	0.102721	0	0.0697984	0.0367007	0	0.232904	0.0012446	0	0.02046	0	0	0.0547705	0.012669	0.0607796	0.0733106	0.149364	0.0655074	0	0.106771	0	0	0.0129994	0.006	0.304079	0.955648
TCGA-64-5779-01A-01R-1628-07	0.101296	0	0.373204	0.101174	0	0.206734	0.0507756	0	0.0184855	0	0.0122893	0	0	0.0755006	0.0353965	0.0127465	0.00997566	0	0.00129237	0	0	0.00112983	0	0.482473	0.893193
TCGA-86-8278-01A-11R-2287-07	0.0605502	0	0.144681	0.0523772	0	0.244278	0.00148433	0	0.00338038	0	0.0241798	0.00583836	0.00725089	0.0871014	0.0635775	0.0876251	0.0815977	0.0689283	0.0606678	0	0	0.00648196	0.002	0.333399	0.945475
TCGA-44-6777-01A-11R-1858-07	0.0442609	0	0.121587	0.0458692	0	0.108803	0.0123833	0.0121001	0.0142301	0	0	0.0141605	0.0243469	0.155157	0.0398025	0.22464	0.0818748	0.004015	0.0796077	0	0	0.017162	0.004	0.306938	0.956646
TCGA-55-8092-01A-11R-2241-07	0.0316958	0.029112	0.139467	0.270338	0	0.0290823	0.120766	0.0478519	0	0	0.00715519	0.0113918	0	0.0564267	0.110836	0.0924512	0.00484788	0	0.0437992	0	0	0.00477835	0.006	0.303534	0.963815
TCGA-73-4675-01A-01R-1206-07	0.00522624	0.0534925	0.00869503	0.0558989	0	0.0379129	0.0234798	0.0150277	0.0388404	0	0	0.0205124	0.0231698	0.290575	0	0.150946	0.138969	0.0420951	0.0882809	0	0	0.00687902	0.014	0.236406	0.99323
TCGA-73-4666-01A-01R-1206-07	0.0308553	0	0.00396024	0.225008	0	0.0561333	0.212103	0.0237025	0	0	0.0333783	0.0155778	0.013022	0.0533499	0.0770663	0.150076	0.0236391	0.0106896	0.069057	0	0	0.0023823	0.002	0.342168	0.941485
TCGA-55-A4DG-01A-11R-A24H-07	0.145726	0	0.171891	0.129831	0	0.253915	0.0217086	0.00803012	0	0	0.00609886	0	0.010928	0.0553665	0.0557689	0.102781	0.00817303	0.00663122	0.0231517	0	0	0	0	0.472276	0.880812
TCGA-MP-A4TF-01A-11R-A262-07	0.1224	0	0.197341	0.0678331	0	0.124404	0.070057	0.0226356	0	0	0.0234132	0.0181353	0	0.201157	0.0626279	0.0247316	0	0.039509	0	0	0.00436799	0.0213868	0	0.407484	0.915978
TCGA-44-2656-01B-06R-A277-07	0.0687477	0	0.0117582	0.0473105	0	0.282673	0.0438509	0	0	0	0	0.0229826	0	0.0358132	0.0475137	0.191882	0	0.181867	0.0483701	0	0.0156179	0.00161418	0.017	0.224095	0.993377
TCGA-55-6980-01A-11R-1949-07	0.0760084	0	0.0323739	0.0342231	0	0.254956	0.00772254	0.0407993	0.0308934	0	0	0.0112816	0.0862953	0.0260028	0.0480988	0.0298704	0.207473	0.0567417	0.0559097	0	0	0.0013505	0.007	0.282303	0.964154
TCGA-50-8457-01A-11R-2326-07	0.117459	0	0.20935	0.0956434	0	0.152365	0.0042704	0.0141454	0.0234714	0	0	0.035178	0.034957	0.0230635	0.0410192	0.117792	0.0128778	0	0.118408	0	0	0	0	0.479463	0.876775
TCGA-44-6146-01A-11R-A278-07	0.0500564	0	0.0153897	0.110153	0	0.381504	0.0478912	0	0	0.00145678	0	0.0151611	0.0202521	0.00895209	0.0724468	0.122344	0.0568765	0.00170054	0.0617954	0	0	0.0340199	0.15	0.0809588	1.05667
TCGA-35-5375-01A-01R-1628-07	0.0126025	0.0214684	0.0224358	0.185593	0	0.110674	0.0697436	0.0719266	0.0188178	0	0.00137529	0	0.0413163	0.0425304	0.110467	0.16552	0.0472934	0.0338618	0.043424	0	0.0009496	0	0.083	0.116401	1.03595
TCGA-50-5931-01A-11R-1755-07	0.136614	0	0.0295063	0.060975	0	0.119839	0	0.118299	0	0	0.018167	0	0	0.263447	0.066171	0.128454	0	0.040936	0.0175915	0	0	0	0.019	0.221895	0.999264
TCGA-55-6971-01A-11R-1949-07	0.0285739	0.0124385	0.14145	0.153643	0	0.137111	0.0110323	0.0231976	0.0372823	0	0	0.055568	0.00713942	0.167335	0.0993257	0.082306	0	0	0.0355881	0	0	0.00800909	0.002	0.320685	0.955359
TCGA-64-1679-01A-21R-2066-07	0.131786	0	0.0761607	0.0238361	0	0.0973246	0.00125499	0	0.0183942	0.00256055	0	0	0	0.343298	0.0128409	0.0784095	0.156575	0.0236785	0	0.0279499	0	0.00593129	0	0.396596	0.921854
TCGA-95-7948-01A-11R-2187-07	0.0963699	0	0.209468	0.109823	0	0.11305	0	0.0245727	0.00234506	0.00129403	0	0.0845293	0.0223859	0.00463562	0.0263927	0.127103	0.0688925	0.0162472	0.0865258	0	0	0.00636442	0	0.396927	0.919949
TCGA-64-5815-01A-01R-1628-07	0.0893487	0	0.0677934	0.0412708	0	0.173074	0.00456072	0.0176013	0.0369435	0	0	0.0082108	0	0.243308	0.00496526	0.154829	0.0592105	0.0532887	0.0324415	0	0	0.0131539	0.007	0.283171	0.969371
TCGA-05-4426-01A-01R-1206-07	0.11469	0	0.0119591	0.047068	0	0.20051	0	0	0.0675539	0	0	0.00241799	0.0337931	0.282969	0.0309144	0.154634	0	0	0.0338814	0	0	0.0196094	0.006	0.303379	0.962993
TCGA-78-7158-01A-11R-2039-07	0.160311	0	0.0178702	0.0441879	0	0.153809	0	0	0.022603	0	0	0.0747131	0.0393889	0.0553073	0.00214171	0.0830309	0.119114	0.0383524	0.178846	0	0	0.010325	0.01	0.270268	0.968747
TCGA-97-8172-01A-11R-2287-07	0.0243356	0.17103	0	0.063514	0	0.266613	0	0.0246173	0.01873	0	0	0.0284135	0.0107126	0.0945415	0.029856	0.119363	0.0362669	0.00432287	0.107683	0	0	0	0.004	0.309002	0.955611
TCGA-91-6840-01A-11R-1949-07	0.202001	0	0.0732257	0.135619	0	0.133683	0.00139568	0.031224	0.0310568	0	0	0.0261991	0	0.14378	0.0927462	0.0767657	0	0	0.0523032	0	0	0	0	0.430454	0.902081
TCGA-55-8299-01A-11R-2287-07	0.079307	0	0.00818643	0.163845	0	0.106783	0.106421	0.0644565	0	0	0.0355783	0.0154102	0	0.0327906	0.086493	0.0634077	0.0155661	0.104282	0.104842	0	0	0.0126296	0.003	0.31124	0.955745
TCGA-49-6767-01A-11R-1858-07	0.00718464	0	0.00326254	0.147635	0	0.129147	0.0860102	0.0159797	0.0297211	0	0.0190495	0.00649406	0	0.336489	0.0734286	0.112359	0.00846264	0	0.0247764	0	0	0	0.001	0.371164	0.933764
TCGA-80-5607-01A-31R-1949-07	0.00449783	0.011505	0.0149917	0.186671	0	0.212341	0.081964	0.0279742	0	0	0	0.0243564	0.014152	0.00630356	0.131175	0.10438	0.0851336	0.00399972	0.08792	0	0	0.00263538	0.08	0.119075	1.04192
TCGA-L9-A444-01A-21R-A24H-07	0.0877892	0	0.107685	0.217699	0	0.184007	0.0741234	0.0248496	0.0197021	0	0.0362745	0	0.007991	0.0517071	0.086224	0.0720286	0.000591444	0	0.0285016	0	0	0.000826159	0.002	0.334892	0.950533
TCGA-38-A44F-01A-11R-A24H-07	0.0161929	0.0843508	0.0268465	0.0826533	0	0.20657	0.00254852	0.0476929	0.0576688	0	0	0.029846	0.0142783	0.0586467	0.106383	0.0984542	0.0810296	0.00793778	0.07431	0	0	0.00459031	0.016	0.228841	0.989104
TCGA-78-7155-01A-11R-2039-07	0.0998606	0	0.0169437	0.204444	0	0.122662	0.0706628	0.0522267	0	0.0197964	0	0.00691422	0.0137102	0.0524016	0.0960045	0.13533	0.0954307	0	0.0136128	0	0	0	0.016	0.227638	0.991645
TCGA-75-5126-01A-01R-1755-07	0.0403598	0	0.00106424	0.026517	0	0.148888	0.0555368	0	0.0157113	0.00938603	0.00652647	0	0.0285652	0.153672	0.0724797	0.243061	0.0351745	0.024811	0.0442463	0	0.0411563	0.0528444	0.001	0.38003	0.924809
TCGA-86-8055-01A-11R-2241-07	0.0178885	0	0.0378459	0.0386213	0	0.185542	0.0433712	0.0153242	0.00741347	0	0.0208854	0	0.0268111	0.268364	0.0905563	0.126023	0.0334017	0.0164449	0.0502534	0	0	0.0212535	0.141	0.0859897	1.05359
TCGA-99-8025-01A-11R-2241-07	0.237445	0	0.0811986	0.0315625	0	0.148564	0.00660485	0.0193208	0.0220273	0	0	0	0	0.255516	0.0326411	0.157415	0	0.00222301	0.00106298	0.00185313	0	0.00256485	0	0.462412	0.886311
TCGA-78-7633-01A-11R-2066-07	0.0574943	0	0.00208979	0.0391156	0	0.263773	0	0.0705954	0	0	0	0.042999	0.0672465	0.0620701	0.0171952	0.195085	0.0148632	0.0967801	0.0684827	0	0	0.00221073	0.186	0.064602	1.05133
TCGA-49-6745-01A-11R-1858-07	0.00531101	0	0	0.141438	0	0.143669	0.0648497	0.0394192	0.0134022	0	0.0123165	0	0.0860982	0.0856008	0.113537	0.112311	0.0665149	0.0523614	0.0625136	0	0	0.000657292	0.013	0.254605	0.978801
TCGA-97-A4LX-01A-11R-A24X-07	0.131018	0	0.103921	0.0848306	0	0.178904	0.0207559	0.0316454	0.0502184	0	0	0.0158954	0.00496361	0.0642197	0.0999633	0.0990191	0.0415844	0.00743483	0.0537908	0	0	0.0118363	0.001	0.375	0.927757
TCGA-78-7147-01A-11R-2039-07	0.084983	0	0.0257004	0.135372	0	0.144024	0.0047031	0.0214975	0.0268952	0	0	0.037962	0.0107419	0.0496404	0.161369	0.134728	0.0487856	0.0156889	0.0979089	0	0	0	0.003	0.314917	0.955655
TCGA-55-A493-01A-11R-A24H-07	0.163236	0	0.050377	0.0969042	0	0.166399	0.0957049	0	0.00548798	0	0.0155675	0.0355591	0	0.0959014	0.0742757	0.159829	0.0164172	0	0.0222015	0	0	0.00214032	0.001	0.378168	0.925698
TCGA-86-7711-01A-11R-2066-07	0.030378	0	0.0212827	0.0482557	0	0.179144	0	0	0	0	0.0563193	0	0	0.342935	0.0399234	0.131492	0	0.00037723	0	0.11339	0	0.0365027	0.04	0.172019	1.03363
TCGA-35-3615-01A-01R-0946-07	0.106089	0	0.132259	0.0669672	0	0.0770887	0.0300654	0.0188219	0.0130149	0	0	0.0295307	0	0.119674	0.0366943	0.191807	0.0396226	0.0525053	0.0733338	0	0	0.0125261	0	0.483905	0.877248
TCGA-50-5946-01A-11R-1755-07	0.162947	0	0.0987204	0.126963	0	0.0931165	0.0416336	0.0732806	0	0	0	0.0176693	0.00283681	0.109873	0.056952	0.108257	0.0276352	0.0267119	0.0472377	0	0	0.00616664	0	0.425139	0.904283
TCGA-44-3918-01B-02R-A277-07	0.0214104	0	0.0159016	0	0	0.42523	0.0307118	0.0213653	0	0.00856689	0	0.0229892	0	0.105703	0.0878489	0.222627	0	0.0313434	0.00506395	0	0	0.00123853	0.028	0.193239	1.01431
TCGA-93-A4JQ-01A-11R-A24X-07	0.149817	0.069155	0.0191886	0.0403002	0	0.272802	0.0278071	0.0544241	0.0456764	0	0	0.0144068	0	0.150224	0.0839692	0.0447193	0.0201642	0	0.00495959	0	0	0.00238626	0.001	0.371517	0.931666
TCGA-55-7910-01A-11R-2170-07	0.0671602	0	0.213786	0.0427407	0	0.240856	0.0403104	0.0401371	0.0220316	0	0.0153219	0	0.0112797	0.150883	0.037151	0.0316128	0	0.0619477	0.00492832	0	0	0.0198535	0	0.396163	0.921556
TCGA-55-8506-01A-11R-2403-07	0.010281	0.00110399	0.0241009	0.063994	0	0.15114	0.0132081	0.00789643	0.0126777	0	0.0214171	0	0	0.273948	0.0598842	0.242223	0.0184741	0.00097602	0.0521523	0.0390685	0	0.00745504	0.053	0.153302	1.03378
TCGA-78-7540-01A-11R-2066-07	0.0393169	0.0399238	0.0111471	0.0594237	0	0.114312	0	0.00482856	0.0108364	0	0	0.0391769	0	0.272075	0.016458	0.242831	0.0477828	0.0338945	0.0679936	0	0	0	0.026	0.200389	1.01034
TCGA-86-7713-01A-11R-2066-07	0.0896642	0	0.0774849	0.0928492	0	0.249852	0	0	0.007966	0	0	0	0.0415475	0.134741	0.0729194	0.135816	0	0.0654008	0	0.0223162	0.000775437	0.00866768	0.013	0.256073	0.980435
TCGA-50-5051-01A-21R-1858-07	0.139451	0	0.189074	0.0860639	0	0.101977	0.0146347	0.0412476	0.0293733	0	0	0.0239647	0	0.133072	0	0.0651757	0.0803419	0.065973	0.0296506	0	0	0	0	0.459123	0.887744
TCGA-55-8204-01A-11R-2241-07	0	0	0.170145	0.0964144	0	0.110618	0.0620228	0	0	0	0.0146219	0	0.00224869	0.0807098	0.167978	0.09029	0.0377544	0.00678631	0.105802	0	0.0144331	0.0401762	0.012	0.25929	0.982629
TCGA-MP-A4TJ-01A-51R-A262-07	0.0709725	0	0.109815	0.143842	0	0.18449	0.120806	0.00291124	0.0135343	0	0.0132665	0	0.00256187	0.134184	0.0743216	0.0717016	0.00319843	0.00777619	0.0371571	0	0	0.00946183	0.004	0.308324	0.957393
TCGA-97-7554-01A-11R-2039-07	0.0565592	0	0.0849444	0.0259419	0	0.238053	0.0225938	0.00715087	0.0184626	0	0.0059891	0.00501784	0.00323716	0.22022	0.0862945	0.149067	0.0163251	0	0.0517811	0	0	0.00836251	0.03	0.189608	1.00857
TCGA-05-4434-01A-01R-1206-07	0.059547	0	0	0.0512688	0	0.192461	0.0477991	0	0.0256165	0	0.03183	0	0	0.150314	0.155921	0.168468	0.0452879	0	0.0610047	0	0	0.0104817	0.006	0.298359	0.962937
TCGA-86-8585-01A-11R-2403-07	0.0318137	0.0216329	0.0197841	0.122844	0	0.124851	0.0269346	0.0768985	0.0583978	0	0.0154256	0	0.0108428	0.271416	0.0504726	0.117352	0	0.027586	0.023749	0	0	0	0.04	0.172158	1.02157
TCGA-64-5781-01A-01R-1628-07	0.130625	0	0.140857	0.205616	0	0.055542	0.113428	0.0694803	0	0.0338385	0	0.0565297	0	0.0473692	0.0389302	0.039128	0.0192073	0	0.0426728	0	0.000757267	0.00601902	0.001	0.366315	0.936668
TCGA-MP-A4T7-01A-11R-A24X-07	0.0330985	0	0.019204	0.0582665	0	0.202021	0.00335932	0.0891301	0.00607906	0	0.00537775	0.0254541	0.00324571	0.118586	0.0141994	0.211422	0	0.154867	0.0373758	0	0	0.0183142	0.01	0.268254	0.974311
TCGA-73-A9RS-01A-11R-A41B-07	0.18197	0	0.169364	0.143411	0	0.0439971	0.0506376	0.0868083	0.000175203	0	0.00411343	0.00250332	0	0.0914571	0.0597961	0.0890167	0	0	0.0767509	0	0	0	0	0.470065	0.881877
TCGA-05-4415-01A-22R-1858-07	0.0737264	0	0.0637676	0.212425	0	0.135383	0.0900247	0.046871	0	0	0.0413498	0.023835	0.00532589	0.0737077	0.0811717	0.0791431	0	0.0104571	0.0415974	0	0	0.0212147	0.012	0.264693	0.979066
TCGA-93-8067-01A-11R-2287-07	0.0984987	0	0.0161751	0.078509	0	0.185395	0	0.0546902	0.0137447	0	0	0.0548433	0.00251584	0.169934	0.103993	0.176014	0.0411068	0.00101026	0	0	0.0032919	0.000278038	0.048	0.157966	1.02547
TCGA-44-6148-01A-11R-1755-07	0.145287	0	0.167253	0.0584525	0	0.0956122	0	0.0375751	0	0	0	0.00488699	0.0465887	0.044651	0.0055868	0.211522	0.0407784	0.00819713	0.125795	0	0	0.00781409	0	0.458987	0.887955
TCGA-95-7947-01A-11R-2187-07	0.16732	0	0.086958	0.0957488	0	0.182851	0.00947712	0.0227139	0.0234899	0	0	0.0119285	0	0.111952	0.117664	0.0965762	0.0117556	0.00267896	0.0549586	0	0	0.00392753	0.001	0.363991	0.934092
TCGA-97-7937-01A-11R-2170-07	0.00717872	0.0152536	0.0375473	0.0493626	0	0.0789093	0.0055567	0.0410943	0.0349411	0	0.0222239	0	0	0.312145	0.067686	0.171825	0.0442112	0	0.0504177	0.0588454	0	0.00280164	0.035	0.177237	1.02407
TCGA-78-8660-01A-11R-2403-07	0.09102	0	0.00735904	0.148232	0	0.173914	0.0392126	0.0464759	0.0460392	0	0.00543029	0.0193505	0	0.164956	0.0934038	0.114008	0.0179562	0	0.0326421	0	0	0	0.031	0.188536	1.01201
TCGA-99-8032-01A-11R-2241-07	0.0802971	0	0.348454	0.0637672	0	0.13938	0.00316604	0.0167853	0.0140292	0	0	0.0280724	0	0.148125	0.0121808	0.0789767	0	0.00744429	0.0469934	0	0	0.0123292	0	0.541297	0.842631
TCGA-50-5072-01A-21R-1858-07	0.190878	0	0.0876459	0.0738341	0	0.160726	0.00213465	0.0593648	0.00829408	0	0	0	0.0236578	0.165349	0.0302797	0.129693	0	0.0446484	0.0189656	0	0	0.00452888	0.001	0.384352	0.924308
TCGA-05-4402-01A-01R-1206-07	0.079884	0	0.0687655	0.0343394	0	0.182085	0	0	0.014161	0	0	0.0511597	0.00792082	0.0895344	0.0422436	0.185068	0.0412562	0.0478276	0.134935	0	0	0.0208195	0.009	0.270645	0.968083
TCGA-55-6970-01A-11R-1949-07	0.0600595	0	0.0294133	0.0762662	0	0.239238	0.0139522	0.0443735	0	0	0	0.0190371	0.027656	0.130747	0.0621667	0.137218	0	0.080361	0.0795112	0	0	0	0.045	0.165292	1.01393
TCGA-86-8669-01A-11R-2403-07	0.0726739	0	0.174327	0.0838443	0	0.170238	0.027096	0.011139	0.0299505	0	0	0.0355342	0.0498792	0.103296	0.030548	0.0549506	0.104174	0.024298	0.0279486	0	0	0.000102139	0	0.439278	0.897674
TCGA-69-7764-01A-11R-2170-07	0.153218	0	0.186797	0.135201	0	0.307846	0.0193306	0.0102489	0	0	0	0	0.00230079	0.0419381	0.0568247	0.0378799	0.0206069	0.0128542	0	0.014954	0	0	0	0.403836	0.922557
TCGA-38-4625-01A-01R-1206-07	0.0666713	0	0.0928594	0.101664	0	0.0944074	0.043995	0.0235382	0	0	0	0.0172936	0.00545379	0.151917	0.0882352	0.183739	0	0.0600857	0.0590535	0	0.000679841	0.010406	0.002	0.343138	0.940994
TCGA-55-7283-01A-11R-2039-07	0.0330426	0	0.00304245	0.139946	0	0.208295	0.0306222	0.0284366	0	0	0	0.0145054	0.0238592	0.0520408	0.077108	0.173325	0.0734355	0.0205322	0.117152	0	0	0.00465758	0.007	0.282388	0.965348
TCGA-73-4668-01A-01R-1206-07	0.169904	0	0.205166	0.06598	0	0.101868	0.0111454	0.02332	0.0135608	0	0	0	0	0.230073	0.0077052	0.0889245	0	0.03717	0.0301755	0.0139309	0	0.00107807	0	0.466857	0.885175
TCGA-44-2666-01A-01R-A278-07	0.0495206	0	0.107397	0.0630661	0	0.15962	0	0.00923641	0	0	0	0.0480705	0.00240971	0.0355963	0	0.0668924	0.0543513	0.0926085	0.216825	0	0.0942625	0.00014353	0.006	0.303551	0.956306
TCGA-55-7907-01A-11R-2170-07	0.114331	0	0.096416	0.142216	0	0.21286	0.0285538	0.0276266	0.0250099	0	0.0055944	0	0	0.102368	0.0804933	0.110896	0.0131562	0	0.0315216	0	0	0.00895717	0.001	0.364444	0.933384
TCGA-55-6975-01A-11R-1949-07	0.174092	0	0.200625	0.0642427	0	0.183573	0.00354022	0.0308202	0.0156395	0	0	0.019407	0.0174705	0.0668491	0.00170605	0.0784859	0	0.0853669	0.0502269	0	0	0.00795456	0	0.457313	0.889586
TCGA-50-6594-01A-11R-1755-07	0.0546932	0	0.0158705	0	0	0.199875	0	0	0	0	0	0.0504568	0.028084	0.198722	0	0.179499	0.0831339	0.105224	0.0791087	0	0	0.005332	0.014	0.232837	0.988112
TCGA-44-6774-01A-21R-1858-07	0.0519669	0	0.0447803	0.0421537	0	0.254546	0.0222313	0	0.0291966	0	0.0580057	0	0.0259127	0.220895	0.0502313	0.16349	0.00693284	0.00231276	0	0.00960859	0	0.0177362	0.045	0.164569	1.02038
TCGA-55-8203-01A-11R-2241-07	0.0202024	0.0494559	0.300113	0.101868	0	0.0660436	0.0510107	0.0449626	0.0416579	0	0	0.00835489	0	0.130428	0.069648	0.0592416	0.0222793	0.00113469	0.0254947	0	0	0.00810456	0	0.491577	0.872007
TCGA-49-AAR0-01A-21R-A39D-07	0.0933997	0	0.046268	0.0759551	0	0.157357	0.000218295	0.111204	0.0436472	0	0	0.0295307	0.00123039	0.102016	0.0739328	0.175131	0.0315463	0	0.055248	0	0	0.00331565	0.006	0.295929	0.961377
TCGA-50-5933-01A-11R-1755-07	0.037619	0	0.0125298	0.0558119	0	0.191786	0.00460018	0.00988804	0	0	0.0057099	0	0.0103007	0.299913	0.0531913	0.281463	0.0048172	0	0.0203649	0.00377106	0	0.00823431	0.008	0.274559	0.983779
TCGA-L9-A7SV-01A-11R-A39D-07	0.111252	0	0.0776871	0.106899	0	0.232172	0.0135707	0.105021	0	0	0	0.0118691	0.00343843	0.0182049	0.0965354	0.168407	0.0258292	0	0.0210061	0	0.00810722	0	0.013	0.252778	0.985449
TCGA-44-2661-01A-01R-1107-07	0.0685031	0	0.115971	0.0947908	0	0.159311	0.0281318	0.0465885	0.0163306	0.00402213	0	0.0106421	0.0275577	0.0021444	0.0466925	0.170536	0.103167	0.000984379	0.0800216	0	0.0135992	0.0110062	0.003	0.314213	0.951476
TCGA-05-4422-01A-01R-1206-07	0.0864682	0	0.23537	0.217291	0	0.164954	0.00904245	0.0366913	0.0332309	0	0.00128022	0	0.0228075	0.0371659	0.0469565	0.0959703	0.00562854	0	0	0.00397129	0	0.00317257	0	0.432227	0.90681
TCGA-L4-A4E6-01A-11R-A24H-07	0.0584933	0	0.0130273	0.0474576	0	0.137826	0.007358	0.0191833	0	0	0.00779658	0.00784578	0.00143233	0.208063	0.0425594	0.304451	0.0761816	0	0.0627942	0	0	0.00553031	0.004	0.308352	0.959986
TCGA-55-7570-01A-11R-2039-07	0.197313	0	0.310353	0.18373	0	0.00162191	0.0206481	0.048757	0.024118	0	0	0.0363432	0.0132859	0.0543775	0.023242	0.045728	0.0176336	0.00144605	0.0204746	0	0	0.000927048	0	0.541266	0.845765
TCGA-05-4250-01A-01R-1107-07	0.0854305	0	0.0275367	0.239147	0	0.113223	0.135129	0.0340403	0	0	0.00972748	0	0.0282672	0.0419667	0.0721623	0.152789	0.0276984	0.0138694	0.0135178	0	0	0.00549472	0.003	0.313707	0.954432
TCGA-97-A4M1-01A-11R-A24X-07	0.0514861	0	0.00775482	0.0636537	0	0.137597	0	0.000667849	0.000678713	0	0	0.0474255	0.0463781	0.107852	0.0285434	0.280875	0.0361596	0.00254384	0.188385	0	0	0	0.003	0.319544	0.95071
TCGA-S2-AA1A-01A-12R-A39D-07	0.124366	0	0.211727	0.0697343	0	0.214012	0.00908127	0.0539357	0.0280799	0	0	0.0221267	0	0.0935459	0.0420705	0.0303436	0.0491798	0	0.0517975	0	0	0	0	0.421601	0.909454
TCGA-38-4628-01A-01R-1206-07	0.00972347	0.00462149	0.0132545	0.0412923	0	0.0698713	0	0.02779	0.000282757	0	0	0.0227998	0.0616917	0.125592	0.011045	0.366838	0.101982	0.0228941	0.100275	0	0	0.0200454	0.006	0.295601	0.965895
TCGA-86-A4D0-01A-11R-A24H-07	0.0809203	0	0.0115094	0.105304	0	0.178612	0.110996	0.073489	0	0	0	0.0587505	0.00742747	0.0184284	0.0591713	0.159879	0.0868853	0.00785694	0.0396815	0	0	0.00108935	0.07	0.129221	1.02864
TCGA-78-7166-01A-12R-2066-07	0.0474332	0.0195641	0.0769176	0.170668	0	0.109427	0.019585	0.0936298	0.050315	0	0.0416327	0	0	0.206244	0.106557	0.0422923	0	0.00858211	0.00715247	0	0	0	0.014	0.236195	0.996753
TCGA-49-AARQ-01A-11R-A41B-07	0.147882	0	0.0625693	0.105584	0	0.0555309	0.010731	0.112661	0.00558966	0.0488998	0	0.0315507	0	0.131335	0.199291	0.0620557	0.00717182	0	0.0191483	0	0	0	0.003	0.31847	0.96324
TCGA-50-6593-01A-11R-1755-07	0.0181405	0.0380451	0.0310132	0.0134272	0	0.0597692	0.00967231	0.0405644	0.0113078	0	0.00213036	0	0.0513635	0.310513	0.0205575	0.111954	0.152062	0.0170575	0.0885947	0	0	0.023827	0.023	0.209276	1.0071
TCGA-44-3918-01A-01R-1107-07	0.0128752	0	0.0928456	0.169023	0	0.129107	0.105131	0.0423164	0	0	0.0393958	0	0	0.103241	0.0920196	0.176992	0.0103021	0	0.0147235	0	0	0.012028	0.026	0.199572	1.00346
TCGA-44-2659-01A-01R-0946-07	0.0920472	0	0.144629	0.15294	0	0.223281	0.00577802	0.0284932	0.0394777	0	0	0.0271332	0.0128015	0.0101786	0.0638593	0.0860338	0.0235323	0	0.0847354	0	0	0.00507986	0.001	0.376426	0.929519
TCGA-44-6778-01A-11R-1858-07	0.0688551	0	0.000401378	0.0801581	0	0.322221	0.0386264	0.0632751	0	0	0.00738243	0.0104127	0.0124843	0.0815458	0.108961	0.131773	0.0399537	0	0.0234678	0	0	0.0104819	0.094	0.105215	1.0493
TCGA-86-A4JF-01A-11R-A24X-07	0.0452266	0	0.0267235	0.0950637	0	0.138201	0.0194194	0.067904	0	0	0	0.0719563	0	0.134249	0.0902629	0.145793	0.0122312	0.0356055	0.107164	0	0	0.0102014	0.035	0.176357	1.01054
TCGA-62-A470-01A-11R-A24H-07	0.0796737	0	0.014013	0.0357254	0	0.179144	0	0.0116689	5.83338e-05	0	0	0.0394398	0	0.168584	0.0543096	0.285755	0.065546	0	0.0582205	0	0	0.00786166	0.059	0.14803	1.02545
TCGA-86-8076-01A-31R-2241-07	0.032471	0	0.183759	0.190157	0	0.0955	0.0267992	0.0282111	0.0621259	0	0	0.00908999	0	0.18788	0.0589932	0.0549635	0.0473362	0	0.0123612	0	0	0.010353	0.001	0.375054	0.930569
TCGA-44-3398-01A-01R-1107-07	0	0.0453033	0.0105439	0.0650361	0	0.178862	0.00716329	0	0	0	0	0.0176241	0.0246489	0.0342301	0.0272147	0.0693955	0.356928	0.0328063	0.0883315	0	0.0299698	0.0119426	0.038	0.174724	1.00895
TCGA-78-7154-01A-11R-2039-07	0.0870001	0	0.00550269	0.0771071	0	0.318675	0.0380838	0.0185507	0	0	0.00738111	0.0158821	0.0113851	0.0449824	0.11803	0.122652	0.0524077	0.00644115	0.075919	0	0	0	0.007	0.28619	0.967246
TCGA-MP-A4TI-01A-21R-A24X-07	0.0511039	0	0.0277967	0.0794379	0	0.141142	0.0774027	0.0309069	0.0432449	0	0.0165803	0.00352455	0.00818808	0.17501	0.101016	0.158537	0.015876	0.0142641	0.0491946	0	0	0.0067755	0	0.477576	0.880503
TCGA-55-8302-01A-11R-2326-07	0.015525	0.0369199	0.0137634	0.163015	0	0.110922	0.00878588	0.0606887	0.00790901	0	0	0.0486745	0.037338	0.122093	0.13921	0.133966	0.016672	0.00225605	0.0822614	0	0	0	0.073	0.125309	1.03695
TCGA-91-8496-01A-11R-2403-07	0.0102563	0.00495794	0	0.0986409	0	0.0975099	0.00419223	0	0.00560264	0	0	0.0244727	0.0515286	0.11485	0.0141275	0.245611	0.114063	0	0.149198	0	0.0204636	0.0445256	0	0.434608	0.900767
TCGA-99-8033-01A-11R-2241-07	0	0.00836378	0.0355159	0.19903	0	0	0.164527	0.107863	0.00432837	0	0.0199034	0.0681055	0.00321179	0.152404	0.0883655	0.0659027	0.00275203	0.0571448	0.0055885	0	0	0.0169938	0.026	0.201311	1.01049
TCGA-97-7547-01A-11R-2039-07	0.117486	0	0.091213	0.0563367	0	0.213081	0.0113838	0.0328312	0.051165	0	0	0.00645804	0.0234233	0.0949463	0.0470486	0.166233	0.0224731	0	0.0659206	0	0	0	0.007	0.288911	0.964305
TCGA-55-6979-01A-11R-1949-07	0.0778071	0	0.11062	0.117961	0	0.150234	0.0270728	0.0496127	0.015209	0	0	0.0157679	0	0.128876	0.0955627	0.155087	0.0163946	0	0.0357686	0	0	0.00402691	0.001	0.356752	0.93594
TCGA-86-7714-01A-12R-2170-07	0.0300132	0	0.00519246	0.0189647	0	0.181456	0	0	0	0	0	0.0341719	0.0186239	0	0	0.205403	0.27595	0.11709	0.103621	0	0	0.00951408	0.006	0.303389	0.957646
TCGA-95-7944-01A-11R-2187-07	0.00578501	0	0.00668367	0.290259	0	0	0.148963	0.0285266	0.00877016	0	0.0690484	0.0656664	0.00194295	0.105734	0.129333	0.0892111	0.00471439	0.0111164	0.0342457	0	0	0	0	0.49498	0.868095
TCGA-91-6830-01A-11R-1949-07	0.0616995	0	0.00286344	0.146464	0	0.15946	0	0.0355369	0	0	0	0.0567373	0.022556	0.160212	0.0996845	0.102527	0.00884499	0.0109403	0.107817	0	0.0172084	0.00744896	0.046	0.161328	1.01936
TCGA-44-2662-01A-01R-A278-07	0.024284	0	0.0760923	0.00738005	0	0.086724	0.0355765	0.00467469	0	0.0151156	0	0.00755164	0.107812	0.262015	0.0144442	0.105811	0.10809	0.0152223	0.0538946	0	0.0176092	0.0577037	0.01	0.269341	0.976498
TCGA-35-4123-01A-01R-1107-07	0.0252839	0	0.0211858	0.33066	0	0.0572151	0.08319	0.0657566	0.0188158	0	0	0.00466578	0.00930309	0.12663	0.0427628	0.161154	0.0289727	0	0.0175254	0.00548973	0.00134999	3.9565e-05	0.004	0.308271	0.96092
TCGA-55-8301-01A-11R-2287-07	0.034488	0	0.155294	0.0946517	0	0.137442	0.0496387	0.0283773	0.0226609	0.00431444	0.00646596	0.00968499	0	0.145642	0.171465	0.0595033	0.024431	0	0.0559396	0	0	0	0.008	0.275254	0.979045
TCGA-44-8120-01A-11R-2241-07	0.117341	0	0.0956494	0.0628313	0	0.189982	0.0481987	0.00658092	0	0	0	0.00165338	0.0228267	0.0859144	0.0218535	0.121806	0.116499	0.0233	0.071916	0	0	0.0136478	0.002	0.328443	0.945704
TCGA-55-6981-01A-11R-1949-07	0.202378	0	0	0.0311249	0	0.206172	0.00601209	0.0256189	0.0158423	0	0	0.00639286	0.0334567	0.15767	0.0101831	0.107992	0.112311	0.0291406	0.0534875	0.00177095	0	0.00044742	0.004	0.307629	0.956072
TCGA-86-8668-01A-11R-2403-07	0.0660186	0	0.142121	0.0540374	0	0.176838	0	0.0448381	0.0232115	0	0	0.0208084	0	0.143646	0.0794536	0.122429	0.0465887	0	0.0747277	0	0	0.00528276	0.001	0.348452	0.939351
TCGA-97-8174-01A-11R-2287-07	0.0926804	0	0.114679	0.0569774	0	0.287885	0.0267277	0	0	0	0.0126835	0	0.0217329	0	0.0994569	0.167228	0.0458224	0.00398203	0.0682597	0	0	0.00188515	0.001	0.347454	0.939566
TCGA-50-5941-01A-11R-1755-07	0.121676	0	0.0483793	0.139111	0	0.128852	0.0343309	0.06179	0.0385894	0	0	0.0228178	0.00671221	0.0990518	0.106514	0.0845007	0.0276341	0.000221413	0.0681797	0	0	0.01164	0.008	0.278135	0.969991
TCGA-73-4658-01A-01R-1755-07	0.068619	0	0.0569033	0.0583561	0	0.1921	0.034859	0.0436852	0.00228966	0.00535189	0	0.0060948	0.057247	0	0.0438669	0.149338	0.229395	0.0121085	0.0320511	0	0	0.00773437	0.007	0.290443	0.960445
TCGA-05-4244-01A-01R-1107-07	0	0.000354245	0.00163048	0.05779	0	0.193251	0.0168269	0.0432491	0.00389129	0	0	0.00847268	0.0657429	0.21557	0.0327487	0.142377	0.1109	0.0334477	0.054684	0	0.0170232	0.00204171	0.1	0.102265	1.04351
TCGA-55-6968-01A-11R-1949-07	0.0309123	0	0.156569	0.0936113	0	0.0645172	0.0559744	0.0115511	0.0224236	0	0.00172424	0.00836961	0	0.352345	0.077022	0.102961	0.00184058	0	0.020179	0	0	0	0.003	0.31317	0.965026
TCGA-67-3771-01A-01R-0946-07	0.0789864	0	0.161307	0.0894127	0	0.0849769	0.0200452	0	0.0153595	0	0	0.0438931	0	0.172484	0.111888	0.140535	0.0143747	0	0.062242	0	0	0.00449472	0	0.393758	0.920252
TCGA-50-6597-01A-11R-1858-07	0.00573591	0.0415895	0.103067	0.0933419	0	0.233023	0.00110389	0.0327378	0.0992925	0.0199021	0	0.0285438	0	0.029516	0.0887404	0.0510306	0.0991468	0.0296239	0.0436053	0	0	0	0.008	0.277548	0.974041
TCGA-75-5147-01A-01R-1628-07	0.0639793	0	0.0755372	0.0706186	0	0.228809	0.0568092	0.0142641	0.0101559	0.00496685	0	0.00216564	0.0212498	0.0677789	0.0605743	0.1068	0.111228	0.0145951	0.0604369	0	0	0.0300312	0.019	0.221712	0.986921
TCGA-J2-8192-01A-11R-2241-07	0.0479438	0	0.0166703	0.0257245	0	0.282653	0.0130885	0	0	0	0.0162135	0	0.00199768	0.205159	0.0207645	0.184181	0.0839724	0.0296575	0.0453859	0	0	0.0265893	0.014	0.238684	0.987316
TCGA-44-A47B-01A-11R-A24H-07	0.0269222	0	0.00336858	0.15287	0	0.171188	0.0581403	0.014845	0.0406964	0	0	0.031156	0	0.15811	0.0503014	0.159226	0.0542037	0	0.0789733	0	0	0	0.02	0.219882	0.994357
TCGA-50-5935-01A-11R-1755-07	0.0495789	0	0.055315	0.0659177	0	0.275846	0.0147286	0.014007	0.0601612	0	0	0.00310403	0.0196047	0.110754	0.0302244	0.0699761	0.109782	0.08183	0.0388176	0	0	0.00035147	0.014	0.23765	0.985183
TCGA-NJ-A55A-01A-11R-A262-07	0.134629	0.0296048	0.0374564	0.0877525	0	0.23181	0.0126793	0.0623312	0.0250999	0	0	0.0227776	0.00284463	0.0325833	0.053964	0.0537439	0.109704	0.0117821	0.0891974	0	0	0.0020393	0.001	0.345234	0.94041
TCGA-55-6972-01A-11R-1949-07	0.0862179	0	0.145008	0.22132	0	0.104812	0	0.0414319	0	0	0.0303698	0.0420694	0.0159329	0.0078734	0.0384383	0.150699	0.0110438	0.04885	0.0439665	0	0.0119674	0	0.046	0.163065	1.02758
TCGA-44-2656-01A-02R-A278-07	0.100024	0	0.0979795	0.141355	0	0.0460091	0.112962	0	0	0.0266279	0	0	0	0.0586425	0.0757791	0.157579	0.0446945	0.0453297	0.056213	0	0.0368049	0	0.002	0.335429	0.942818
TCGA-69-7973-01A-11R-2187-07	0.0861909	0	0.106768	0.109783	0	0.141528	0.0842431	0	0.00166192	0	0	0.0366771	0.0145982	0.0390207	0.0409681	0.129007	0.0520203	0.0250836	0.121444	0	0	0.0110069	0.003	0.311337	0.952372
TCGA-44-6146-01B-04R-A277-07	0.104836	0	0.0162321	0.00873078	0	0.468076	0.0118998	0	0	0	0	0	0.0103907	0	0.00386896	0.125429	0.0297729	0.126612	0.0187645	0	0.0645919	0.0107958	0.124	0.0915419	1.0538
TCGA-44-6779-01A-11R-1858-07	0.0220322	0	0.00912123	0.1776	0	0.177941	0.0533269	0.0172816	0.0486423	0	0.065582	0	0	0.078491	0.141211	0.142345	0.015044	0	0.0420143	0	0	0.0093678	0.003	0.318993	0.957086
TCGA-69-8253-01A-11R-2287-07	0.108775	0	0.226025	0.0911097	0	0.121182	0	0.0230665	0	0	0	0.0445633	0.0108325	0.0682856	0	0.103052	0.0715633	0.0652211	0.0462037	0	0	0.0201207	0	0.541252	0.842162
TCGA-86-8074-01A-11R-2241-07	0.00879255	0	0.0086165	0.0491016	0	0.132288	0.0469448	0.0377206	0.0341409	0	0	0.0138109	0.0205667	0.203733	0.0711893	0.195604	0.0924786	0.0203708	0.0317058	0	0.0182672	0.0146696	0.123	0.0923799	1.04853
TCGA-05-4249-01A-01R-1107-07	0.00925127	0.0516003	0.0291677	0.0331204	0	0.120444	0	0.0386001	0.0306033	0	0	0	0.0122183	0.000962926	0.0385732	0.1161	0.350578	0.00860443	0.133853	0	0	0.0263237	0.028	0.193315	1.0007
TCGA-55-1596-01A-01R-0946-07	0.0499463	0	0.0523661	0.0983386	0	0.125524	0	0.0663589	0.05935	0	0.023583	0	0.00278663	0.156443	0.0804197	0.14255	0	0.106507	0.0358275	0	0	0	0.039	0.172932	1.01622
TCGA-55-7914-01A-11R-2170-07	0.0319035	0	0.293855	0.141977	0	0.151161	0.0391139	0.0171572	0.0308409	0	0	0	0	0.0561799	0.103394	0.0807631	0.00309975	0	0.0505542	0	0	0	0	0.392964	0.931182
TCGA-75-6211-01A-11R-1755-07	0.0172344	0.00710634	0.152774	0.103395	0	0.196337	0.0259745	0.0629552	0.029781	0	0	0.0358067	0.014119	0	0.0296768	0.171774	0.0464906	0.00488174	0.089525	0	0	0.0121687	0.002	0.325409	0.949619
TCGA-75-7025-01A-12R-1949-07	0.180018	0	0.0700398	0.0820173	0	0.178793	0	0.0327153	0.0347945	0	0	0.0387034	0.0414575	0	0.00284873	0.0615049	0.147359	0.0551299	0.0688367	0	0	0.00578276	0	0.442851	0.896266
TCGA-MP-A4TK-01A-11R-A24X-07	0.017066	0.0443103	0.058404	0.0373368	0	0.15703	0.0357654	0.0078897	0.0172119	0	0.0131378	0	0	0.324926	0.0423856	0.123504	0.0667003	0.00390068	0.0504328	0	0	0	0.02	0.217935	1.00173
TCGA-62-A46V-01A-11R-A24H-07	0.0276991	0	0.0034297	0.0129559	0	0.156707	0	0.00704588	0	0	0	0.0252097	0.0288028	0.105898	0	0.195354	0.191882	0.119867	0.125149	0	0	0	0.007	0.285694	0.965379
TCGA-MP-A4TA-01A-21R-A24X-07	0.0562385	0	0.0566604	0.164375	0	0.172096	0.0342084	0.0708346	0.00228565	0	0.00850385	0.0467384	0.00598901	0.162589	0.0797043	0.0843867	0	0.00697093	0.0484198	0	0	0	0.028	0.192256	1.01048
TCGA-97-8179-01A-11R-2287-07	0.022197	0	0	0.0705769	0	0.0646867	0	0.0824769	0.0217794	0	0	0.0333577	0.0257503	0.203184	0.0466132	0.183843	0.111797	0.0148683	0.0743139	0	0.0398296	0.00472564	0.045	0.164736	1.01664
TCGA-91-6831-01A-11R-1858-07	0	0.0143062	0.0547294	0.114028	0	0.0923133	0.00500059	0.0232355	0.0335879	0	0	0.0383588	0.00297707	0.263973	0.0707952	0.233323	0.00368963	0	0.0353086	0	0	0.0143737	0.086	0.11017	1.05073
TCGA-05-5420-01A-01R-1628-07	0.0255497	0	0.015872	0.0943218	0	0.130955	0.0769216	0.0203555	0.00738955	0	0.0120744	0	0.00158047	0.118072	0.133426	0.168267	0.125778	0	0.0454634	0	0.00366813	0.0203055	0.176	0.0690293	1.05363
TCGA-J2-A4AE-01A-21R-A24H-07	0.266602	0	0.15275	0.0825459	0	0.174538	0.0174635	0.0282339	0	0.00534853	0	0.00801073	0.00383196	0.0178526	0.0498148	0.0916005	0.0106852	0.025476	0.064655	0	0	0.000591857	0	0.565742	0.825171
TCGA-50-6673-01A-11R-1949-07	0.0959456	0	0.0284525	0.0296889	0	0.196039	4.29031e-05	0.0463946	0.0258286	0	0	0.031082	0.0200912	0.157589	0.0425121	0.170303	0.0741899	0.0429529	0.0313	0	0	0.00758729	0.034	0.183913	1.00595
TCGA-75-6206-01A-11R-1755-07	0.0377797	0	0.00835032	0.0361339	0	0.0694431	0.0115137	0.03764	0.0153622	0	0.00944732	0.00100519	0	0.452661	0.0334157	0.239919	0.000891553	0	0.0415092	0	0	0.00492822	0.002	0.332591	0.968633
TCGA-49-AARN-01A-21R-A41B-07	0.0729446	0.034145	0.226898	0.0650093	0	0.128914	0	0.0404416	0.06575	0	0	0.0419129	0	0.0760759	0.0437275	0.0450096	0.0889613	0.00566223	0.0619422	0	0	0.00260625	0	0.494365	0.868472
TCGA-55-6985-01A-11R-1949-07	0.150968	0	0.0935871	0.0507757	0	0.201816	0.0456899	0.00407942	0.0159048	0	0	0.0278582	0	0.135697	0.0791943	0.101114	0.00718902	0	0.0800248	0	0	0.00610221	0	0.397415	0.917112
TCGA-L9-A443-01A-12R-A24H-07	0.135866	0	0.0973542	0.118261	0	0.171195	0.00722301	0.0718397	0.0100698	0	0	0.0164732	0	0.138691	0.0857216	0.0890468	0.0199363	0	0.0383229	0	0	0	0.002	0.33259	0.94854
TCGA-97-A4M2-01A-12R-A24X-07	0.0944383	0	0.0590008	0.118061	0	0.123052	0.0199767	0.0482306	0	0	0.0370525	0.00360523	0.027453	0.154293	0.0368101	0.139122	0.0372186	0.0136019	0.0816744	0	0	0.00641032	0.001	0.351713	0.936165
TCGA-55-7815-01A-11R-2170-07	0.0461609	0	0.00157789	0.0294631	0	0.334967	0.0893079	0	0	0.026417	0	0	0.00809587	0.088273	0.0406338	0.169174	0.0908098	0.0229622	0.0435299	0	0	0.00862727	0.091	0.108647	1.03534
TCGA-49-AAR2-01A-11R-A39D-07	0.130093	0	0.312119	0.0855325	0	0.0776206	0.0222381	0.0168129	0.0349157	0	0	0.0522809	0.00795658	0.0949877	0.0341961	0.0550908	0	0	0.0761565	0	0	0	0	0.60303	0.797095
TCGA-55-7576-01A-11R-2066-07	0.0751109	0	0.0169246	0.121937	0	0.173867	0.0319429	0.0201766	0.0307558	0	0	0.0153689	0.0239289	0.0706705	0.0745023	0.158114	0.0762434	0.0273073	0.0748125	0	0	0.00833749	0.023	0.211448	0.992401
TCGA-78-7160-01A-11R-2039-07	0.0917539	0	0.0167022	0.168191	0	0.256584	0.0312034	0.0080045	0.0150012	0	0	0	0.00977718	0.0916273	0.0668166	0.148732	0.016754	0.0442546	0.0261675	0	0	0.00843088	0.002	0.337191	0.945289
TCGA-55-8090-01A-11R-2241-07	0.163351	0	0.10272	0.05489	0	0.234557	0	0	0.00604728	0	0	0.0743547	0.0376978	0.0483445	0.0303247	0.14479	0.0957929	0.00193664	0	0	0.00139055	0.00380335	0	0.414235	0.909615
TCGA-49-4486-01A-01R-1206-07	0.171035	0	0.230732	0.101357	0	0.160587	0.0191442	0.0522115	0	0	0	0.0132476	0.00805962	0	0.0425255	0.118764	0.0581716	0.0123358	0.00745781	0	0	0.00437254	0	0.449705	0.89648
TCGA-97-8176-01A-11R-2403-07	0.0586116	0	0.0285978	0.0781373	0	0.0308992	0.0573971	0.0325907	0.00973173	0	0.0282767	0	0.0811109	0.274707	0.0237237	0.175372	0.0240719	0	0.0362636	0	0	0.0605086	0.007	0.279907	0.972423
TCGA-69-7761-01A-11R-2170-07	0	0.0356432	0.0455712	0.146634	0	0.300572	0.0728968	0.00531932	0.00388221	0	0	0	0	0.15099	0.0894889	0.0729423	0.0246898	0.00116087	0.0405792	0	0	0.00963095	0.069	0.1327	1.03657
TCGA-55-8510-01A-11R-2403-07	0.113333	0	0.0450158	0.127665	0	0.144094	0	0.0367802	0.0181774	0	0	0.0556533	0.0088045	0.106084	0.0820231	0.114023	0.0534273	0	0.0899425	0	0	0.00497698	0.002	0.326967	0.947311
TCGA-55-8508-01A-11R-2403-07	0.182974	0	0.344147	0.00180068	0	0.0639064	0.0526076	0	0.0175576	0	0.0297202	0	0	0.210538	0.012065	0.0416547	0	0	0	0.0254009	0	0.017627	0	0.508485	0.873856
TCGA-73-4662-01A-01R-1206-07	0.0828206	0	0.178005	0.102142	0	0.216653	0.0185548	0.0189063	0.016179	0.0113698	0	0	0.016718	0.0750428	0.013861	0.106978	0.069198	0.0483231	0.020843	0	0	0.0044053	0	0.417576	0.908487
TCGA-55-8206-01A-11R-2241-07	0.081743	0	0.037996	0.0248274	0	0.151266	0	0	0.0336355	0	0	0.0653968	0.201877	0	0.00951736	0.0780978	0.151673	0.00285134	0.154919	0	0.00620042	0	0.006	0.296077	0.957847
TCGA-44-4112-01B-06R-A277-07	0.100824	0	0.0296207	0	0	0.474632	0.0283285	0	0	0.000830159	0.00092294	0	0	0.0731882	0.00645235	0.151864	0	0.0885419	0.0406023	0	0	0.00419367	0.035	0.178388	1.01725
TCGA-75-7030-01A-11R-1949-07	0.194101	0	0.172505	0.130233	0	0.21267	0.00359315	0	0	0	0	0.0119476	0	0.0703214	0.0414596	0.0827201	0.0397224	0.00676127	0.0339645	0	0	0	0	0.454691	0.891083
TCGA-49-4512-01A-21R-1858-07	0.0769237	0	0.0237662	0.00601287	0	0.15813	0	0.0178697	0.0330998	0	0	0.00013652	0.0328598	0.132467	0.0130392	0.306966	0.0797898	0.0444318	0.0745071	0	0	0	0.007	0.289738	0.964444
TCGA-MP-A4TE-01A-22R-A466-07	0.27078	0	0.313292	0.074106	0	0.0707689	0	0.0147994	0.019015	0	0	0	0	0.110051	0	0.044321	0	0.00866494	0	0.0283547	0	0.0458464	0	0.643086	0.765985
TCGA-55-8615-01A-11R-2403-07	0.0866945	0	0.0472987	0.00865768	0	0.0991592	0	0.0694581	0.0429767	0	0	0.00498004	0.0258449	0.403769	0.0120083	0.116137	0.00153201	0.0581223	0.0233616	0	0	0	0.017	0.226211	1.00925
TCGA-91-6828-01A-11R-1858-07	0.123127	0	0.0804994	0.115163	0	0.23599	0.0111599	0.0183986	0	0	0	0.0326895	0.0317179	0.00166146	0.0575243	0.182484	0.0595182	0	0.0289769	0	0	0.0210892	0.002	0.320918	0.951136
TCGA-49-4488-01A-01R-1755-07	0.0109182	0.0105378	0.0333302	0.178317	0	0.122806	0.0545288	0.0290226	0.0400502	0	0	0	0.0080597	0.140562	0.0871819	0.11324	0.145411	0.00461276	0.0214226	0	0	0	0.069	0.131559	1.02975
TCGA-50-6590-01A-12R-1858-07	0.0108158	0.00206558	0.0796987	0.104648	0	0.133809	0.0741091	0.0104641	0.0161468	0	0	0.0327019	0	0.252105	0.112079	0.132716	0	0	0.0374436	0	0	0.00119652	0.057	0.148955	1.0303
TCGA-86-8279-01A-11R-2287-07	0.0327062	0	0.0425683	0.0264916	0	0.0860492	0.0083539	0.014294	0.018056	0	0.0102351	0	0.000802622	0.344095	0.034421	0.116826	0.249806	0.0064284	0.00886676	0	0	0	0.042	0.168258	1.03918
TCGA-38-4632-01A-01R-1755-07	0.0391119	0	0.0140194	0.0835049	0	0.145319	0.0905812	0.0357258	0.0100604	0	0.01246	0	0.00813209	0.0426279	0.0520064	0.14786	0.211777	0.018778	0.0571227	0	0.00641372	0.0245005	0.019	0.222041	0.985902
TCGA-50-5044-01A-21R-1858-07	0.0569155	0	0.0940681	0.141879	0	0.10484	0.099636	0.0157102	0.0450506	0	0.00278728	0.0230926	0.00834615	0.0660609	0.059359	0.145325	0.0613532	0.0155057	0.057136	0	0	0.00293422	0.006	0.300192	0.957288
TCGA-95-A4VP-01A-21R-A262-07	0.215518	0	0.0862238	0.166735	0	0.0693805	0.0463663	0.0584412	0.050689	0	0.019547	0	0.0135985	0.0585392	0.0402485	0.112052	0.0320164	0.00768179	0.020745	0	0	0.00221815	0	0.476634	0.878542
TCGA-49-AAR3-01A-11R-A41B-07	0.0541418	0	0.0663453	0.173994	0	0.0774381	0.0811264	0.0234376	0.029187	0	0	0.0331753	0	0.171935	0.0784426	0.158883	0.0190586	0	0.0328348	0	0	0	0.013	0.251384	0.980975
TCGA-38-4631-01A-01R-1755-07	0.127399	0	0.134271	0.113286	0	0.123422	0.0106004	0	0.00622477	0	0	0.0195554	0	0.133665	0.0996115	0.126163	0.00667176	0	0.0338305	0	0	0.0653008	0.002	0.338761	0.946318
TCGA-95-7562-01A-11R-2241-07	0.121327	0	0.0807899	0.0332583	0	0.203184	0.031996	0.0142293	0.0202043	0	0	0.0059121	0.00233916	0.196915	0.0891488	0.140386	0.0121456	0	0.0417689	0	0	0.00639607	0.007	0.291855	0.964968
TCGA-69-7978-01A-11R-2187-07	0.0250837	0.00154877	0.0511904	0.15683	0	0.217686	0.0661634	0.00546779	0.0372758	0	0.00740553	0.00840619	0.00726685	0.0664558	0.0920697	0.129532	0.072137	0	0.0453354	0	0	0.0101462	0.029	0.190851	1.00571
TCGA-55-7903-01A-11R-2170-07	0.109409	0	0.0326623	0.146809	0	0.100043	0.0528292	0.0387074	0.020162	0	0.0301661	0	0.0097562	0.151578	0.11875	0.0926628	0.0507135	0.025449	0.0177313	0.00257065	0	0	0.001	0.366091	0.931456
TCGA-44-2666-01B-02R-A277-07	0.154721	0	0.0971283	0.0137467	0	0.449599	0	0	0	0	0	0.0368377	0.0175506	0.00973265	0	0.00557453	0	0.0310423	0.179765	0	0	0.00430177	0.006	0.301062	0.970405
TCGA-4B-A93V-01A-11R-A39D-07	0.108985	0	0.224111	0.0812193	0	0.0555501	0.0738047	0.0151415	0.0350144	0	0	0.0361131	0	0.277834	0.0281228	0.0425313	0	0	0.0215733	0	0	0	0	0.476511	0.879431
TCGA-44-5645-01B-04R-A277-07	0.0907333	0	0.000164173	0	0	0.329955	0.0201852	0	0	0	0	0.0120601	0.0417551	0	0.0301465	0.232369	0.126887	0.00698589	0.0794128	0	0.0293454	0	0.014	0.239562	0.980838
TCGA-44-A479-01A-31R-A24H-07	0.063517	0	0.167626	0.132128	0	0.219426	0.0523989	0.02352	0.0304774	0	0.0105023	0	0	0.0691634	0.0871626	0.103198	0.0155396	0	0.021978	0	0	0.00336318	0.002	0.338942	0.948092
TCGA-05-4430-01A-02R-1206-07	0.0194934	0	0.0306546	0.0634823	0	0.0894524	0.0276579	0.0377475	0.0176218	0	0	0.0245956	0.00780042	0.20725	0.0648056	0.150373	0.12895	0.0437974	0.0671863	0	0.0033677	0.015764	0.052	0.15479	1.01986
TCGA-95-7043-01A-11R-1949-07	0.338404	0	0.100654	0.239525	0	0	0	0.0541496	0	0	0	0	0.00495344	0.0271034	0.0324444	0.115191	0	0.00683906	0.0807361	0	0	0	0	0.553632	0.832219
TCGA-MP-A4TH-01A-31R-A262-07	0.154175	0.0328662	0.178945	0.104111	0	0.13962	0.0160523	0.053895	0.0426725	0	0	0.00234508	0	0.0710345	0.0255923	0.0945614	0.0414047	0.0164709	0.026254	0	0	0	0	0.536504	0.844052
TCGA-38-4626-01A-01R-1206-07	0.0303286	0	0.00762608	0.0320076	0	0.0999133	0.0114087	0	0	0	0.00619146	0.00923899	0.0474297	0.294599	0.0072536	0.268448	0	0.067516	0.0786611	0	0	0.0393783	0.007	0.290697	0.974646
TCGA-50-5930-01A-11R-1755-07	0.121235	0	0.226332	0.150999	0	0.0448087	0.0626433	0.016846	0.000650377	0	0.00105606	0	0	0.188935	0.0618604	0.108186	0.00168273	0	0.0129304	0	0	0.00183519	0	0.481203	0.876388
TCGA-78-7535-01A-11R-2066-07	0.00062486	0.019933	0.026905	0.039206	0	0.0854731	0	0.000675299	0.0103766	0	0.0230236	0.00389447	0.0227668	0.334635	0.0118656	0.213835	0.205994	0	0.000792342	0	0	0	0.006	0.297904	0.978982
TCGA-50-6592-01A-11R-1755-07	0.195206	0	0.0533353	0.125403	0	0.117564	0.0729552	0.0110592	0	0	0.0465936	0.0118112	0	0.157431	0.0708253	0.101193	0	0	0.0276955	0	0	0.00892771	0.001	0.364544	0.932741
TCGA-NJ-A55R-01A-11R-A262-07	0.137985	0.0306488	0.172596	0.0660306	0	0.0416254	0.00526393	0.0246261	0.0407273	0	0	0.034671	0	0.300009	0.0130508	0.0681196	0	0	0.0646473	0	0	0	0	0.422883	0.909298
TCGA-91-8499-01A-11R-2403-07	0.0452099	0	0.0189819	0.180741	0	0.176344	0.0245435	0.0402673	0.014011	0	0.0106404	0	0.00042067	0.0931964	0.115995	0.142271	0.103625	0	0.0182749	0	0.0139277	0.00155103	0.067	0.136609	1.03186
TCGA-55-6986-01A-11R-1949-07	0.114558	0	0.0644756	0.0728426	0	0.18565	0.00445956	0.0295118	0.0201806	0	0	0.0246633	0.0107468	0.0511017	0.026809	0.19529	0.1205	0.0051244	0.0613079	0	0	0.0127781	0.001	0.353974	0.93521
TCGA-55-6712-01A-11R-1858-07	0.117244	0	0.0508468	0.127974	0	0.243226	0.0249831	0	0.0173807	0.0120895	0	0	0	0.136076	0.0978473	0.111855	0	0	0.0604789	0	0	0	0.003	0.31119	0.95696
TCGA-44-2662-01B-02R-A277-07	0.0100295	0	0.00252328	0	0	0.184015	0.00897275	0.0192129	0	0	0.030491	0	0.0272716	0.0774105	0.0416997	0.35789	0	0.0194779	0	0	0.149746	0.0712596	0.041	0.169645	1.021
TCGA-67-6215-01A-11R-1755-07	0.00462199	0.0216727	0	0.0621448	0	0.164127	0.00794649	0	0.0160643	0	0.014812	0.000285571	0.0320345	0.107184	0.00378098	0.219605	0.153735	0.0300754	0.15518	0	0	0.00673073	0.041	0.170793	1.01021
TCGA-MP-A4TD-01A-32R-A262-07	0.124706	0	0.197125	0.0762951	0	0.132756	0	0.0259226	0.0375059	0	0	0.0222608	0	0.228811	0.0107676	0.093129	0.00521541	0.00975168	0.0357531	0	0	0	0	0.451878	0.892513
TCGA-78-7536-01A-11R-2066-07	0.0552631	0	0.0791779	0.157172	0	0.16051	0.0402627	0.0332947	0	0	0	0.047202	0.0171132	0.0620821	0.0997907	0.200092	0.0269188	0	0.0160828	0	0	0.0050382	0.013	0.248655	0.983434
TCGA-86-6562-01A-11R-1755-07	0.0209571	0	0.0220298	0.0321213	0	0.242444	0.0195867	0.019739	0.0168083	0	0.0342824	0	0.0169535	0.215573	0.0461397	0.176712	0.0227244	0.0371523	0.0420806	0	0	0.0346958	0.119	0.0950844	1.0469
TCGA-05-4418-01A-01R-1206-07	0.112837	0	0.140722	0.120705	0	0.130553	0.0626759	0.0242428	0	0	0	0.0254105	0	0.099645	0.0761382	0.137903	0	0.00867384	0.0503541	0	0	0.0101404	0.001	0.350531	0.9394
TCGA-MP-A4T9-01A-11R-A24X-07	0.131362	0	0.0107252	0.0842957	0	0.21358	0.00831117	0.00255243	0.000855793	0	0.0281883	0	0.0178049	0.182885	0.0395112	0.171267	0.0158517	0.0209944	0.0662523	0	0	0.00556437	0.004	0.310794	0.954764
TCGA-78-7143-01A-11R-2039-07	0.0790937	0	0	0.0258081	0	0.191944	0.00354643	0.054955	0.0217996	0	0	0.00955956	0.0202834	0.120462	0.00600688	0.105377	0.140526	0.157094	0.0616324	0	0	0.00191242	0	0.404875	0.9138
TCGA-69-8255-01A-11R-2287-07	0.127092	0	0.099403	0.26073	0	0.077219	0.172114	0.0469653	0	0	0.00400037	0.020937	0.0137655	0.0400484	0.0521189	0.0612109	0.000688911	0.00166787	0.0220378	0	0	0	0.002	0.337963	0.94888
TCGA-05-4384-01A-01R-1755-07	0.120706	0	0.0630504	0.0612033	0	0.105598	0	0.0259361	0	0	0	0.0265311	0.0206574	0.170377	0.0164635	0.261177	0.0591307	0	0.0456702	0	0	0.0235002	0.001	0.385409	0.922873
TCGA-73-7499-01A-11R-2187-07	0.0706981	0	0.108911	0.221484	0	0.0690343	0.0783876	0.0351686	0.0555127	0	0	0.00169854	0	0.0637348	0.120279	0.0864692	0.0465685	0	0.0392933	0	0	0.00276101	0.006	0.297555	0.964337
TCGA-86-8075-01A-11R-2241-07	0.0527576	0	0.0465475	0.0142457	0	0.123694	0.0105992	0.0244786	0.022495	0	0	0.00288399	0.00405188	0.15157	0.06028	0.265415	0.0456306	0.0689639	0	0.0701701	1.39365e-05	0.0362033	0.072	0.127165	1.03582
TCGA-50-5946-02A-11R-2090-07	0.117022	0	0.228365	0.169724	0	0.0769464	0.0775698	0	0.0330282	0	0.021655	0	0	0.0765717	0.0837819	0.061135	0.0173288	0.00132253	0.0319916	0	0	0.00355775	0	0.447299	0.89575
TCGA-44-5645-01A-01R-1628-07	0.0952077	0	0.0409295	0.03784	0	0.237866	0.0175638	0.0193371	0.0524043	0	0	0.0187351	0.0208776	0.0813856	0.0241042	0.0930891	0.132386	0.0588907	0.0665225	0	0	0.0028602	0.001	0.381705	0.923647
TCGA-NJ-A4YQ-01A-11R-A262-07	0.0495249	0.0525846	0.0491571	0.181958	0	0.10429	0.0276583	0.0945686	0.0285393	0	0	0.0112649	0	0.215548	0.0624075	0.0998538	0	0	0.0226444	0	0	0	0.007	0.286735	0.969778
TCGA-49-4487-01A-21R-1858-07	0.119921	0.0022116	0.0780079	0.23548	0	0.0228299	0.0960284	0.0117701	0.068274	0	0	0	0	0.198739	0.0520781	0.090082	0	0.00955246	0.015025	0	0	0	0.002	0.323797	0.952099
TCGA-62-8398-01A-11R-2326-07	0.232221	0	0.0220078	0.0237086	0	0.200698	0.0112756	0.0148849	0.00877234	0	0.0111637	0.0440506	0.0186981	0.192332	0.0629338	0.0913031	0.0133769	0.000802193	0.0419485	0	0	0.00982313	0.001	0.351162	0.939171
TCGA-MP-A4SW-01A-21R-A24X-07	0.152784	0	0.20876	0.0541595	0	0.133344	0.0185278	0.0218627	0.0382493	0	0.0253263	0.00641779	0.00471007	0.119148	0.0147897	0.157149	0	0.0194645	0.0239474	0	0	0.00136019	0	0.558389	0.831024
TCGA-73-4677-01A-01R-1206-07	0.146407	0	0.154161	0.134509	0	0.20692	0	0.0178304	0	0	0	0.0136049	0.03142	0.00262775	0.0277122	0.121138	0.0560381	0.0254132	0.0514542	0	0	0.0107628	0	0.48318	0.875081
TCGA-86-8673-01A-11R-2403-07	0.0444211	0	0.0846733	0.183828	0	0.0605379	0.0418024	0.0357518	0.0496304	0	0.0455331	0.0237576	0	0.260985	0.0552961	0.111791	0	0	0	0	0	0.00199166	0.022	0.213101	1.00532
TCGA-75-5146-01A-01R-1628-07	0.0972652	0	0.232867	0.0834131	0	0.200026	0.010493	0.0258204	0.0106503	0	0	0.0240822	0.0154092	0.0131903	0.043063	0.131499	0.0320064	0.0189656	0.0460217	0	0	0.0152273	0	0.449009	0.893819
TCGA-49-4490-01A-21R-1858-07	0.10578	0	0.0133653	0.0833302	0	0.179453	0	0.0549957	0.0859743	0	0	0.0316074	0.00744631	0.218785	0.0694821	0.0587865	0.0120057	0.0152825	0.0637053	0	0	0	0.01	0.267979	0.976534
TCGA-71-8520-01A-11R-2403-07	0.173276	0	0.0257149	0	0	0.124298	0.00544141	0.0129636	0.025194	0.0134405	0.0417412	0	0	0.32981	0.0171134	0.144876	0	0.0329577	0.0524984	0	0	0.00067471	0.001	0.364238	0.935618
TCGA-55-7913-01B-11R-2241-07	0.106323	0	0.118012	0.0524462	0	0.0862814	0.0265034	0.0664865	0.0298002	0	0.00560694	0	0	0.354429	0.0344902	0.0585535	0.0446998	0	0	0	0	0.0163667	0.002	0.329531	0.955696
TCGA-44-7669-01A-21R-2066-07	0.0838564	0	0.0452851	0.0592268	0	0.211531	0.0524086	0	0	0	0.020509	0.00346465	0.00914536	0.0878146	0.141848	0.179178	0.0338338	0	0.0650666	0	0	0.00683174	0.013	0.253869	0.979045
TCGA-55-8505-01A-11R-2403-07	0.0306323	0	0.0756162	0.0309395	0	0.0959079	0	0.0136271	0.029625	0	0	0.0157399	0	0.507848	0.0312175	0.141657	0	2.38658e-05	0.00667341	0.013121	0	0.00737136	0.069	0.133778	1.08086
TCGA-50-6595-01A-12R-1858-07	0.0218655	0	0	0.0338	0	0.185437	0.0361162	0.0176093	0	0	0.0202391	0.0305408	0	0.221471	0.133689	0.215841	0	0.0173686	0.0596843	0	0	0.00633885	0.007	0.279952	0.975466
TCGA-62-A471-01A-12R-A24H-07	0.219154	0	0.0579032	0.157496	0	0.0888421	0.0378264	0.0249399	0.0143119	0	0.0648857	0.0483134	0.0113546	0.141364	0.0156602	0.0288003	0	0.0342719	0.0459102	0	0	0.00896651	0.001	0.376283	0.929307
TCGA-78-7161-01A-11R-2039-07	0.138691	0	0.164092	0.0479301	0	0.210522	0	0.0251701	0.0165119	0	0	0.0818375	0	0.106825	0.0252289	0.0672562	0	0.0444143	0.0546055	0	0	0.0169147	0.001	0.359922	0.938268
TCGA-53-A4EZ-01A-12R-A24X-07	0.134407	0	0.0440543	0.119079	0	0.200139	0.0436654	0.056024	0.00172844	0	0	0.00734823	0.0164049	0.0661934	0.0567315	0.0959337	0.110042	0	0.0400885	0	0	0.00816026	0.008	0.27598	0.968749
TCGA-62-8397-01A-11R-2326-07	0.0625822	0	0.0252758	0.037388	0	0.176023	0.0051645	0	0.0132916	0	0	0.0470245	0.0875012	0	0	0.169395	0.156617	0.0238222	0.195915	0	0	0	0.031	0.18848	0.998583
TCGA-67-4679-01B-01R-1755-07	0.0727702	0	0.00980335	0.0751559	0	0.209137	0.00805717	0.0101624	0	0	0	0.0206378	0.0890226	0	0.0237505	0.0705659	0.215018	0.0126463	0.173079	0	0.000852868	0.0093409	0.002	0.34109	0.940138
TCGA-38-7271-01A-11R-2039-07	0.00308881	0.161067	0.0394935	0.206234	0	0.195326	0.0226956	0	0.060348	0	0	0.0105889	0.00315821	0.0992864	0.0225783	0.101822	0.0228864	0.0153717	0.0327472	0	0	0.00330783	0.001	0.357573	0.937287
TCGA-50-5944-01A-11R-1755-07	0.106683	0	0.0267625	0.0449038	0	0.119424	0	0.0133835	0.0148118	0	0	0.0203299	0.0485464	0.130014	0.0312075	0.290362	0.0150691	0.00141816	0.13664	0	0.000444193	0	0.002	0.334478	0.944322
TCGA-80-5608-01A-31R-1949-07	0.0669128	0	0.0696686	0.128779	0	0.152978	0.0306314	0.0114339	0.0357245	0	0.0449634	0.0134644	0	0.0780537	0.0702826	0.114059	0.0381949	0.0431037	0.0573205	0	0	0.04443	0.012	0.264825	0.972625
TCGA-91-7771-01A-11R-2170-07	0.126476	0	0.0767576	0.0998686	0	0.35234	0.023748	0.00428273	0	0	0	0.0133916	0.00897032	0.0252794	0.0650553	0.140476	0.0237326	0.00536078	0.0298822	0	0	0.00437911	0.003	0.31176	0.958907
TCGA-55-8207-01A-11R-2241-07	0.0842368	0	0.016837	0.0736121	0	0.183686	0.00194565	0.0116672	0.0129539	0	0.00341563	0.00132483	0.045392	0.120961	0.0135002	0.185678	0.126974	0.0224302	0.0840994	0	0	0.0112855	0.002	0.33025	0.945062
TCGA-62-A46O-01A-11R-A24H-07	0.335246	0	0.267519	0	0	0.113468	0.00442824	0.0254202	0.0180975	0	0.0376105	0.0124177	0.00602699	0.0622257	0.002779	0.0234618	0	0.0871461	0	0	0.0041535	0	0	0.529322	0.859624
TCGA-44-A47A-01A-21R-A24H-07	0.0533057	0	0.00801028	0.0250628	0	0.14386	0.017238	0.0413413	0.0556807	0	0.00431419	0	0.00879623	0.0896227	0.000985265	0.0518325	0.308019	0.130215	0.0617159	0	0	0	0	0.394043	0.918834
TCGA-44-7661-01A-11R-2066-07	0.0270686	0	0	0.0467225	0	0.170842	0.129188	0.0190908	0	0	0	0.0165261	0.0532493	0.0795769	0.0609013	0.127052	0.0799972	0.116339	0.0592543	0	0.00658709	0.00760511	0.002	0.339553	0.94101
TCGA-J2-8194-01A-11R-2241-07	0.106584	0	0.06798	0.0485801	0	0.218674	0.00698538	0.0173896	0	0	0.00505811	0	0.0689467	0.0217388	0.0458928	0.20177	0.102434	0.01278	0	0.0199878	0	0.0551986	0.013	0.244234	0.980435
TCGA-95-A4VN-01A-11R-A262-07	0.0439949	0	0.00379073	0.150859	0	0.154122	0.0940127	0.0410765	0.00159286	0	0.0180884	0.0169833	0.00410859	0.110865	0.0952866	0.191974	0.0427564	0.00547331	0.0178242	0	0	0.00719197	0.001	0.361621	0.933409
TCGA-50-5932-01A-11R-1755-07	0.0597029	0	0.111354	0.049593	0	0.186658	0	0.0411376	0.00319886	0	0.000840906	0.0245914	0.0244902	0.116471	0.0319869	0.242101	0	0.0340352	0.061759	0	0	0.0120809	0.006	0.299005	0.959498
TCGA-44-2657-01A-01R-1107-07	0.0974536	0.00770173	0.18154	0.196653	0	0.11368	0.0487443	0.0480329	0.0399485	0	0	0	0.00672996	0.0391508	0.0510569	0.0963486	0.0308095	0.00624713	0.0333343	0	0	0.00256969	0	0.489536	0.871239
TCGA-MP-A5C7-01A-11R-A262-07	0.0548178	0	0.0793491	0.0363582	0	0.292422	0	0.0382498	0	0	0	0.0527212	0.0104983	0.039002	0.060187	0.161096	0.0788157	0.0353286	0.0611539	0	0	0	0.027	0.197379	1.00014
TCGA-75-7031-01A-11R-1949-07	0.071439	0	0.0995444	0.13892	0	0.21055	0.0539949	0.0206053	0.0126326	0	0.0277246	0.00815364	0.00799471	0.0916179	0.0848755	0.109489	0.0201238	0.00273962	0.0317144	0	0	0.00788142	0.002	0.34144	0.942888
TCGA-55-8087-01A-11R-2241-07	0	0.0193126	0.000678594	0.0349285	0	0.133735	0	0.00286118	0.0164436	0	0	0.028005	0.0170888	0	0.0165533	0.0809569	0.480158	0	0.155088	0	0	0.0141896	0.002	0.328095	0.951672
TCGA-55-8621-01A-11R-2403-07	0.093895	0	0.127233	0.0873279	0	0.133398	0.0106975	0	0	0	0	0.0330491	0.0204102	0.0970682	0.0787177	0.140168	0.0595513	0	0.105454	0	0	0.0130295	0	0.441818	0.897025
TCGA-55-A492-01A-11R-A24H-07	0.145944	0	0.306072	0.0587857	0	0.0488983	0.0318185	0.0565272	0.0134175	0	0.0179674	0	0.00541069	0.0569831	0.0263763	0.15579	0.00439306	0.0216049	0.0500117	0	0	0	0	0.610741	0.791632
TCGA-55-8085-01A-11R-2241-07	0.121014	0	0.0883299	0.140647	0	0.0853329	0.0684581	0.0525284	0.057391	0	0	0.0176074	0.0267615	0.137364	0.0760465	0.0694155	0.0214392	0.0242345	0.00721858	0	0	0.00621159	0.001	0.374323	0.927956
TCGA-NJ-A55O-01A-11R-A262-07	0.0986435	0	0.0253921	0.0332574	0	0.176476	0.0104075	0.0397859	0.0176543	0	0	0.0234188	0	0.115337	0.0795245	0.266665	0.0204652	0.00227302	0.0863959	0	0	0.00430405	0.002	0.34138	0.941135
TCGA-05-4390-01A-02R-1755-07	0.0155222	0	0.0225685	0.0528323	0	0.0996993	0.0907631	0	0.013934	0	0.0126392	0	0	0.461887	0.0481296	0.142002	0	0	0.0321087	0	0	0.00791337	0.203	0.0576504	1.10281
TCGA-97-7552-01A-11R-2039-07	0.104322	0	0.131539	0.27122	0	0.109397	0.015849	0.00653509	0.0182204	0.0140479	0	0.0104117	0	0.124562	0.0928112	0.0426534	0.0220774	0	0.0363544	0	0	0	0	0.398738	0.919302
TCGA-80-5611-01A-01R-1628-07	0	0.0148956	0.00167815	0.0446684	0	0.101112	0.0148699	0.0373326	0.0397949	0	0	0.00544715	0.0477828	0.426905	0.0878783	0.133924	0.0164687	0	0.0272421	0	0	0	0.023	0.209579	1.02604
TCGA-78-8648-01A-11R-2403-07	0.0768116	0	0.117966	0.111105	0	0.0866601	0.0165593	0.0326937	0.0143999	7.99937e-05	0	0.02003	0	0.332915	0.0288508	0.110367	0.00302804	0	0.0463536	0	0	0.00217942	0.006	0.296805	0.969355
TCGA-91-A4BD-01A-11R-A24H-07	0.00676505	0	0.0577035	0.026974	0	0.138181	0	0.0359015	0.0236163	0	0	0.0247628	0.159286	0.0489909	0.0162623	0.214392	0.0363246	0.0437267	0.167113	0	0	0	0.034	0.182766	1.00119
TCGA-78-8655-01A-11R-2403-07	0.023697	0.0144311	0.00111817	0.105892	0	0.108536	0.021476	0.0238104	0.0248691	0	0	0.0137165	0.00881043	0.298733	0.0750249	0.169322	0.0266876	0	0.0829773	0	0	0.000898464	0.023	0.208102	1.00709
TCGA-78-7162-01A-21R-2066-07	0.105504	0	0.0682979	0.132987	0	0.231811	0.00734673	0.0453865	0	0	0	0.0295092	0.0114475	0.0300092	0.0512349	0.120568	0.0264092	0.0370908	0.102398	0	0	0	0.006	0.293782	0.962812
TCGA-49-4494-01A-01R-1206-07	0.0400505	0	0.0246857	0.161509	0	0.113257	0.0371347	0.0418216	0.0297147	0	0	0.0141058	0.0217979	0.0810065	0.0680657	0.140938	0.189368	0.00488003	0.016533	0	0	0.015131	0.068	0.135098	1.02464
TCGA-55-7728-01A-11R-2187-07	0.0587151	0.00197427	0.00507685	0.0425123	0	0.0390612	0	0.0185308	0.0613164	0	0	0.00188232	0	0.506613	0.033457	0.203425	0.00839326	0	0.0190417	0	0	0	0.001	0.350964	0.964356
TCGA-86-6851-01A-11R-1949-07	0.00432381	0.00802017	0.109718	0.119924	0	0.196698	0.059065	0.0588177	0.0226088	0.0327697	0.0195801	0.0115607	0	0.112035	0.0838497	0.10262	0.0106033	0	0.0470895	0	0	0.000716129	0.013	0.246468	0.985882
TCGA-86-8359-01A-11R-2326-07	0.15754	0	0.0639377	0.271213	0	0.12056	0.0357772	0.0640196	0.0712536	0	0	0.0308317	0.0103542	0.09065	0.0265104	0.0288651	0	0.000647553	0	0	0	0.0278399	0.002	0.327929	0.959773
TCGA-67-6216-01A-11R-1755-07	0.080766	0	0.0706295	0.0796819	0	0.130573	0.0132994	0.0195172	0.0422232	0	0	0.0439334	0.078968	0.00762427	0.0274417	0.0952304	0.194038	0.0173979	0.0967779	0	0	0.001898	0.014	0.239095	0.97907
TCGA-69-8453-01A-12R-2326-07	0.0356577	0.00151856	0	0.0935727	0	0.125086	0.0117969	0.0349693	0.0170079	0	0	0.00636875	0.00596977	0.315667	0.0692512	0.190101	0.046902	0	0.0409707	0	0	0.00516057	0	0.442822	0.896532
TCGA-55-6983-01A-11R-1949-07	0.06345	0.112257	0.0484613	0.128192	0	0.199344	0.00134863	0.0315122	0.0437875	0	0	0.0163316	0	0.178386	0.019983	0.0834641	0.0394665	0.00785746	0.0225015	0	0	0.00365727	0.002	0.339046	0.94556
TCGA-75-6212-01A-11R-1755-07	0.142332	0	0.115505	0.0232952	0	0.146339	0.00834639	0.0112851	0.0288737	0	0	0	0	0.0285193	0.0154469	0.14946	0.20106	0.0151947	0.101272	0	0	0.0130691	0	0.414515	0.909511
TCGA-44-2666-01A-01R-0946-07	0.0727898	0	0.12496	0.0848484	0	0.137757	0	0.0326351	0	0	0	0.0312554	0.00659836	0.0316891	0.00783312	0.0592717	0.0633561	0.0319017	0.238894	0	0.0704498	0.00576072	0.001	0.347294	0.93918
TCGA-64-1680-01A-02R-0946-07	0.15646	0	0.0838159	0.0635651	0	0.202959	0	0.0618049	0	0.0216647	0	0.0264309	0	0.0188597	0.0579678	0.157592	0.0374065	0.0139352	0.0929932	0	0	0.00454472	0.012	0.264889	0.975405
TCGA-73-7498-01A-12R-2187-07	0.0416149	0	0.142389	0.0507694	0	0.299377	0.00969504	0.00216154	0.0457804	0	0	0.0178352	0.0476092	0.0158882	0.030434	0.146973	0.0402968	0.0179162	0.0912592	0	0	0	0.011	0.266318	0.974575
TCGA-55-7284-01B-11R-2241-07	0.0562919	0	0.0165581	0.0839881	0	0.103053	0.00840821	0.011683	0.0155626	0	0	0.0161112	0	0.308255	0.0753045	0.187643	0.0273437	0	0.0754982	0	0	0.0142989	0.007	0.287556	0.972025
TCGA-55-8096-01A-11R-2241-07	0	0.0403457	0.0657699	0.0493209	0	0.0934101	0.0401085	0	0.0161687	0	0.011023	0	0.0062682	0.386802	0.0402242	0.177355	0.0220763	0	0.0431814	0	0	0.00794553	0.038	0.174805	1.03379
TCGA-93-A4JN-01A-11R-A24X-07	0.0609606	0.0497595	0.0939047	0.0487444	0	0.172484	0.00825484	0.0465043	0.0466352	0	0.0072827	0.00602731	0.0058873	0.143387	0.0346901	0.149419	0.0191748	0.0150729	0.0827837	0	0	0.00902669	0.006	0.2994	0.959238
TCGA-93-A4JP-01A-11R-A24X-07	0.0553976	0	0	0.028696	0	0.0672566	0	0.0325143	0	0	0.00811662	0.00545255	0.0255507	0.158127	0.0894166	0.327853	0.0196313	0.0464508	0.115054	0	0.0177258	0.00275613	0.002	0.32451	0.95248
TCGA-75-6203-01A-11R-1755-07	0.0436064	0	0.014523	0.0994072	0	0.177211	0	0	0	0	0.0157317	0.00768418	0.00635814	0.208336	0.0187056	0.270063	0.0381105	0.0163004	0.0719163	0	0	0.012046	0.002	0.338816	0.94498

## Sheet: Supplementary Table S5
Supplementary Table S5: Data of immune subtypes from TIMER2.0
id	Subtype_Immune_Model_Based
TCGA-A5-A0GI-01	Wound Healing (Immune C1)
TCGA-S9-A7J2-01	Immunologically Quiet (Immune C5)
TCGA-EK-A2RE-01	IFN-gamma Dominant (Immune C2)
TCGA-D5-5538-01	IFN-gamma Dominant (Immune C2)
TCGA-F4-6854-01	Wound Healing (Immune C1)
TCGA-AX-A2H7-01	Wound Healing (Immune C1)
TCGA-C8-A1HL-01	Wound Healing (Immune C1)
TCGA-EW-A2FS-01	IFN-gamma Dominant (Immune C2)
TCGA-IR-A3L7-01	Wound Healing (Immune C1)
TCGA-05-4420-01	Wound Healing (Immune C1)
TCGA-2G-AAFZ-01	Wound Healing (Immune C1)
TCGA-DX-A3U8-01	Lymphocyte Depleted (Immune C4)
TCGA-GL-8500-01	Lymphocyte Depleted (Immune C4)
TCGA-CC-A3MA-01	Wound Healing (Immune C1)
TCGA-IN-7808-01	IFN-gamma Dominant (Immune C2)
TCGA-CC-A9FW-01	Inflammatory (Immune C3)
TCGA-AA-3982-01	IFN-gamma Dominant (Immune C2)
TCGA-B9-A8YH-01	Inflammatory (Immune C3)
TCGA-E1-A7YI-01	Lymphocyte Depleted (Immune C4)
TCGA-B5-A1MY-01	IFN-gamma Dominant (Immune C2)
TCGA-CH-5751-01	IFN-gamma Dominant (Immune C2)
TCGA-A2-A3XX-01	Wound Healing (Immune C1)
TCGA-DQ-5624-01	IFN-gamma Dominant (Immune C2)
TCGA-KK-A7B3-01	Inflammatory (Immune C3)
TCGA-HG-A2PA-01	IFN-gamma Dominant (Immune C2)
TCGA-06-5412-01	Lymphocyte Depleted (Immune C4)
TCGA-BP-4765-01	Inflammatory (Immune C3)
TCGA-EJ-8468-01	Inflammatory (Immune C3)
TCGA-CZ-5459-01	Inflammatory (Immune C3)
TCGA-KK-A8I5-01	Inflammatory (Immune C3)
TCGA-KP-A3W3-01	IFN-gamma Dominant (Immune C2)
TCGA-IQ-A61O-01	Wound Healing (Immune C1)
TCGA-BH-A18K-01	Wound Healing (Immune C1)
TCGA-DD-AAW0-01	Inflammatory (Immune C3)
TCGA-AG-A011-01	Wound Healing (Immune C1)
TCGA-AA-3511-01	IFN-gamma Dominant (Immune C2)
TCGA-Z7-A8R5-01	Wound Healing (Immune C1)
TCGA-39-5031-01	Wound Healing (Immune C1)
TCGA-ZG-A8QW-01	Inflammatory (Immune C3)
TCGA-DU-7302-01	Immunologically Quiet (Immune C5)
TCGA-DJ-A3UX-01	Inflammatory (Immune C3)
TCGA-ZN-A9VQ-01	Wound Healing (Immune C1)
TCGA-EI-6512-01	Wound Healing (Immune C1)
TCGA-J4-A83K-01	Inflammatory (Immune C3)
TCGA-2H-A9GF-01	Wound Healing (Immune C1)
TCGA-HZ-7922-01	TGF-beta Dominant (Immune C6)
TCGA-BJ-A28S-01	Inflammatory (Immune C3)
TCGA-AG-3578-01	Wound Healing (Immune C1)
TCGA-QG-A5YX-01	Wound Healing (Immune C1)
TCGA-AA-3553-01	Wound Healing (Immune C1)
TCGA-ZG-A9MC-01	IFN-gamma Dominant (Immune C2)
TCGA-FE-A238-01	IFN-gamma Dominant (Immune C2)
TCGA-DU-A7TI-01	Lymphocyte Depleted (Immune C4)
TCGA-BR-8372-01	IFN-gamma Dominant (Immune C2)
TCGA-HC-7742-01	Inflammatory (Immune C3)
TCGA-64-1679-01	Wound Healing (Immune C1)
TCGA-CV-5976-01	IFN-gamma Dominant (Immune C2)
TCGA-25-1315-01	IFN-gamma Dominant (Immune C2)
TCGA-R6-A8WC-01	Wound Healing (Immune C1)
TCGA-GE-A2C6-01	Inflammatory (Immune C3)
TCGA-CV-6948-01	Wound Healing (Immune C1)
TCGA-D1-A1NW-01	IFN-gamma Dominant (Immune C2)
TCGA-CJ-6028-01	Inflammatory (Immune C3)
TCGA-24-2297-01	IFN-gamma Dominant (Immune C2)
TCGA-CZ-5456-01	Inflammatory (Immune C3)
TCGA-AA-3693-01	Wound Healing (Immune C1)
TCGA-EM-A22Q-01	Inflammatory (Immune C3)
TCGA-49-6744-01	IFN-gamma Dominant (Immune C2)
TCGA-L5-A4ON-01	Lymphocyte Depleted (Immune C4)
TCGA-IB-7891-01	TGF-beta Dominant (Immune C6)
TCGA-ZN-A9VU-01	IFN-gamma Dominant (Immune C2)
TCGA-Q3-A5QY-01	Inflammatory (Immune C3)
TCGA-66-2794-01	IFN-gamma Dominant (Immune C2)
TCGA-AJ-A3BI-01	IFN-gamma Dominant (Immune C2)
TCGA-W2-A7UY-01	Inflammatory (Immune C3)
TCGA-E3-A3E2-01	Inflammatory (Immune C3)
TCGA-FB-A545-01	IFN-gamma Dominant (Immune C2)
TCGA-G4-6320-01	Wound Healing (Immune C1)
TCGA-EB-A41A-01	Wound Healing (Immune C1)
TCGA-55-6982-01	IFN-gamma Dominant (Immune C2)
TCGA-RC-A7SH-01	Lymphocyte Depleted (Immune C4)
TCGA-CD-8528-01	Lymphocyte Depleted (Immune C4)
TCGA-CM-6164-01	Wound Healing (Immune C1)
TCGA-C5-A1ME-01	Wound Healing (Immune C1)
TCGA-09-0369-01	Wound Healing (Immune C1)
TCGA-E2-A2P6-01	Inflammatory (Immune C3)
TCGA-VD-A8KF-01	Lymphocyte Depleted (Immune C4)
TCGA-AX-A0IZ-01	IFN-gamma Dominant (Immune C2)
TCGA-EL-A4JZ-01	Inflammatory (Immune C3)
TCGA-M7-A722-01	Lymphocyte Depleted (Immune C4)
TCGA-CV-A6K0-01	IFN-gamma Dominant (Immune C2)
TCGA-13-1512-01	IFN-gamma Dominant (Immune C2)
TCGA-BH-A1EN-01	Lymphocyte Depleted (Immune C4)
TCGA-D1-A17D-01	Inflammatory (Immune C3)
TCGA-AO-A1KT-01	Wound Healing (Immune C1)
TCGA-N9-A4Q1-01	Wound Healing (Immune C1)
TCGA-12-5299-01	Lymphocyte Depleted (Immune C4)
TCGA-EM-A3AN-01	Inflammatory (Immune C3)
TCGA-29-1761-01	IFN-gamma Dominant (Immune C2)
TCGA-BJ-A0ZJ-01	Inflammatory (Immune C3)
TCGA-P5-A5EX-01	Inflammatory (Immune C3)
TCGA-DJ-A4V2-01	Inflammatory (Immune C3)
TCGA-HT-8563-01	Lymphocyte Depleted (Immune C4)
TCGA-J8-A3O2-01	Inflammatory (Immune C3)
TCGA-E9-A3HO-01	IFN-gamma Dominant (Immune C2)
TCGA-AX-A1CA-01	IFN-gamma Dominant (Immune C2)
TCGA-A6-A567-01	Wound Healing (Immune C1)
TCGA-58-A46N-01	Wound Healing (Immune C1)
TCGA-B5-A1MR-01	IFN-gamma Dominant (Immune C2)
TCGA-A3-3383-01	IFN-gamma Dominant (Immune C2)
TCGA-NJ-A4YI-01	Inflammatory (Immune C3)
TCGA-D8-A1XJ-01	Wound Healing (Immune C1)
TCGA-VT-A80J-01	IFN-gamma Dominant (Immune C2)
TCGA-Q1-A73Q-01	IFN-gamma Dominant (Immune C2)
TCGA-AG-3587-01	IFN-gamma Dominant (Immune C2)
TCGA-BQ-5880-01	Inflammatory (Immune C3)
TCGA-75-7027-01	Wound Healing (Immune C1)
TCGA-BA-6870-01	IFN-gamma Dominant (Immune C2)
TCGA-73-4666-01	IFN-gamma Dominant (Immune C2)
TCGA-MV-A51V-01	Wound Healing (Immune C1)
TCGA-77-A5G6-01	Wound Healing (Immune C1)
TCGA-5P-A9K4-01	Inflammatory (Immune C3)
TCGA-VD-A8KE-01	Lymphocyte Depleted (Immune C4)
TCGA-56-A4BX-01	Wound Healing (Immune C1)
TCGA-E9-A3QA-01	IFN-gamma Dominant (Immune C2)
TCGA-BR-A4J9-01	Inflammatory (Immune C3)
TCGA-CV-6955-01	IFN-gamma Dominant (Immune C2)
TCGA-P3-A5Q6-01	Wound Healing (Immune C1)
TCGA-FG-A60K-01	Immunologically Quiet (Immune C5)
TCGA-D7-A4Z0-01	Inflammatory (Immune C3)
TCGA-QK-A64Z-01	IFN-gamma Dominant (Immune C2)
TCGA-2J-AABI-01	Wound Healing (Immune C1)
TCGA-AC-A2FK-01	Inflammatory (Immune C3)
TCGA-VP-A879-01	Inflammatory (Immune C3)
TCGA-29-A5NZ-01	Wound Healing (Immune C1)
TCGA-B5-A1MV-01	Wound Healing (Immune C1)
TCGA-DV-A4W0-01	Inflammatory (Immune C3)
TCGA-37-4129-01	Lymphocyte Depleted (Immune C4)
TCGA-DD-AAVZ-01	Lymphocyte Depleted (Immune C4)
TCGA-D5-6534-01	TGF-beta Dominant (Immune C6)
TCGA-DJ-A13R-01	Inflammatory (Immune C3)
TCGA-E9-A1R4-01	IFN-gamma Dominant (Immune C2)
TCGA-3U-A98F-01	Lymphocyte Depleted (Immune C4)
TCGA-77-8145-01	IFN-gamma Dominant (Immune C2)
TCGA-LL-A740-01	Wound Healing (Immune C1)
TCGA-F5-6863-01	Wound Healing (Immune C1)
TCGA-06-2565-01	Lymphocyte Depleted (Immune C4)
TCGA-33-AASD-01	Wound Healing (Immune C1)
TCGA-ET-A3BS-01	Inflammatory (Immune C3)
TCGA-DM-A1D4-01	Wound Healing (Immune C1)
TCGA-22-5478-01	Wound Healing (Immune C1)
TCGA-MN-A4N1-01	Wound Healing (Immune C1)
TCGA-LN-A4A8-01	IFN-gamma Dominant (Immune C2)
TCGA-55-7911-01	IFN-gamma Dominant (Immune C2)
TCGA-EY-A1GC-01	IFN-gamma Dominant (Immune C2)
TCGA-ED-A627-01	Inflammatory (Immune C3)
TCGA-N6-A4VC-01	Wound Healing (Immune C1)
TCGA-16-0846-01	Lymphocyte Depleted (Immune C4)
TCGA-C8-A3M8-01	Wound Healing (Immune C1)
TCGA-BH-A0BM-01	Inflammatory (Immune C3)
TCGA-DM-A0X9-01	Wound Healing (Immune C1)
TCGA-AY-A69D-01	Wound Healing (Immune C1)
TCGA-AN-A0XW-01	Wound Healing (Immune C1)
TCGA-55-A4DG-01	Inflammatory (Immune C3)
TCGA-RW-A684-01	Lymphocyte Depleted (Immune C4)
TCGA-XD-AAUL-01	Wound Healing (Immune C1)
TCGA-AA-3667-01	Wound Healing (Immune C1)
TCGA-ET-A2N4-01	Inflammatory (Immune C3)
TCGA-58-A46J-01	IFN-gamma Dominant (Immune C2)
TCGA-24-1551-01	IFN-gamma Dominant (Immune C2)
TCGA-06-2561-01	Lymphocyte Depleted (Immune C4)
TCGA-WC-A88A-01	Lymphocyte Depleted (Immune C4)
TCGA-DD-AAVV-01	Inflammatory (Immune C3)
TCGA-ZJ-A8QQ-01	IFN-gamma Dominant (Immune C2)
TCGA-37-4133-01	IFN-gamma Dominant (Immune C2)
TCGA-77-8146-01	Wound Healing (Immune C1)
TCGA-2G-AAHN-01	IFN-gamma Dominant (Immune C2)
TCGA-L9-A5IP-01	Wound Healing (Immune C1)
TCGA-CJ-5672-01	Inflammatory (Immune C3)
TCGA-73-4662-01	Inflammatory (Immune C3)
TCGA-3U-A98I-01	TGF-beta Dominant (Immune C6)
TCGA-CQ-5327-01	IFN-gamma Dominant (Immune C2)
TCGA-FI-A2F4-01	IFN-gamma Dominant (Immune C2)
TCGA-E2-A1LL-01	Wound Healing (Immune C1)
TCGA-FD-A3SR-01	IFN-gamma Dominant (Immune C2)
TCGA-KK-A8II-01	Lymphocyte Depleted (Immune C4)
TCGA-BH-A28O-01	Inflammatory (Immune C3)
TCGA-XV-AAZW-01	Wound Healing (Immune C1)
TCGA-BJ-A0Z2-01	Inflammatory (Immune C3)
TCGA-DK-A6B0-01	Lymphocyte Depleted (Immune C4)
TCGA-97-7553-01	Inflammatory (Immune C3)
TCGA-ET-A2N0-01	Inflammatory (Immune C3)
TCGA-YB-A89D-01	Wound Healing (Immune C1)
TCGA-CH-5752-01	Inflammatory (Immune C3)
TCGA-77-7142-01	IFN-gamma Dominant (Immune C2)
TCGA-CR-7374-01	IFN-gamma Dominant (Immune C2)
TCGA-KS-A4I1-01	Inflammatory (Immune C3)
TCGA-60-2719-01	IFN-gamma Dominant (Immune C2)
TCGA-VR-A8Q7-01	Wound Healing (Immune C1)
TCGA-A7-A4SC-01	Inflammatory (Immune C3)
TCGA-YU-A90Y-01	IFN-gamma Dominant (Immune C2)
TCGA-FD-A5BS-01	IFN-gamma Dominant (Immune C2)
TCGA-IG-A3Y9-01	IFN-gamma Dominant (Immune C2)
TCGA-VR-A8EY-01	Wound Healing (Immune C1)
TCGA-J7-6720-01	Inflammatory (Immune C3)
TCGA-E9-A24A-01	Lymphocyte Depleted (Immune C4)
TCGA-49-AARE-01	Wound Healing (Immune C1)
TCGA-BC-4073-01	IFN-gamma Dominant (Immune C2)
TCGA-A6-2671-01	IFN-gamma Dominant (Immune C2)
TCGA-DK-A1AD-01	IFN-gamma Dominant (Immune C2)
TCGA-B6-A400-01	IFN-gamma Dominant (Immune C2)
TCGA-EM-A2OW-01	Inflammatory (Immune C3)
TCGA-XF-AAMQ-01	IFN-gamma Dominant (Immune C2)
TCGA-BB-A5HY-01	IFN-gamma Dominant (Immune C2)
TCGA-AG-3742-01	Wound Healing (Immune C1)
TCGA-WB-A816-01	Inflammatory (Immune C3)
TCGA-EA-A410-01	Wound Healing (Immune C1)
TCGA-CN-4722-01	Wound Healing (Immune C1)
TCGA-AN-A041-01	Wound Healing (Immune C1)
TCGA-13-0899-01	Wound Healing (Immune C1)
TCGA-AY-A8YK-01	Wound Healing (Immune C1)
TCGA-QA-A7B7-01	Lymphocyte Depleted (Immune C4)
TCGA-A5-AB3J-01	Inflammatory (Immune C3)
TCGA-50-8460-01	Inflammatory (Immune C3)
TCGA-PG-A917-01	IFN-gamma Dominant (Immune C2)
TCGA-IB-7889-01	TGF-beta Dominant (Immune C6)
TCGA-EM-A3SY-01	Lymphocyte Depleted (Immune C4)
TCGA-ZG-A9L1-01	Inflammatory (Immune C3)
TCGA-CN-5361-01	IFN-gamma Dominant (Immune C2)
TCGA-EX-A3L1-01	Wound Healing (Immune C1)
TCGA-50-5933-01	TGF-beta Dominant (Immune C6)
TCGA-EM-A3O7-01	Inflammatory (Immune C3)
TCGA-IE-A4EH-01	Wound Healing (Immune C1)
TCGA-A2-A04Y-01	IFN-gamma Dominant (Immune C2)
TCGA-43-3394-01	Wound Healing (Immune C1)
TCGA-ZF-AA4T-01	IFN-gamma Dominant (Immune C2)
TCGA-MQ-A6BQ-01	Lymphocyte Depleted (Immune C4)
TCGA-E2-A1LH-01	IFN-gamma Dominant (Immune C2)
TCGA-ET-A39P-01	Inflammatory (Immune C3)
TCGA-78-7155-01	Wound Healing (Immune C1)
TCGA-2G-AAM4-01	Wound Healing (Immune C1)
TCGA-AG-3727-01	Wound Healing (Immune C1)
TCGA-E7-A3X6-01	IFN-gamma Dominant (Immune C2)
TCGA-5M-AAT4-01	Wound Healing (Immune C1)
TCGA-24-1474-01	Lymphocyte Depleted (Immune C4)
TCGA-3H-AB3U-01	Wound Healing (Immune C1)
TCGA-CM-6167-01	Wound Healing (Immune C1)
TCGA-IZ-8196-01	Inflammatory (Immune C3)
TCGA-CR-7370-01	Wound Healing (Immune C1)
TCGA-BQ-5888-01	Inflammatory (Immune C3)
TCGA-B6-A0RH-01	IFN-gamma Dominant (Immune C2)
TCGA-EL-A3ZG-01	Inflammatory (Immune C3)
TCGA-EL-A3CR-01	Inflammatory (Immune C3)
TCGA-AA-3520-01	Wound Healing (Immune C1)
TCGA-A8-A07W-01	Wound Healing (Immune C1)
TCGA-QR-A6GY-01	Lymphocyte Depleted (Immune C4)
TCGA-VD-A8KA-01	Lymphocyte Depleted (Immune C4)
TCGA-YL-A8HJ-01	Inflammatory (Immune C3)
TCGA-64-1677-01	IFN-gamma Dominant (Immune C2)
TCGA-AU-6004-01	IFN-gamma Dominant (Immune C2)
TCGA-GU-A762-01	IFN-gamma Dominant (Immune C2)
TCGA-2Z-A9JK-01	Inflammatory (Immune C3)
TCGA-CS-5397-01	Lymphocyte Depleted (Immune C4)
TCGA-AX-A3G8-01	Wound Healing (Immune C1)
TCGA-B5-A11Q-01	Inflammatory (Immune C3)
TCGA-AA-3812-01	Inflammatory (Immune C3)
TCGA-AR-A1AS-01	Lymphocyte Depleted (Immune C4)
TCGA-CZ-4860-01	Lymphocyte Depleted (Immune C4)
TCGA-DD-AACA-01	Inflammatory (Immune C3)
TCGA-09-2048-01	Wound Healing (Immune C1)
TCGA-HU-A4GQ-01	IFN-gamma Dominant (Immune C2)
TCGA-E1-5322-01	Immunologically Quiet (Immune C5)
TCGA-73-4670-01	Wound Healing (Immune C1)
TCGA-ZG-A9L5-01	Inflammatory (Immune C3)
TCGA-CN-5365-01	IFN-gamma Dominant (Immune C2)
TCGA-MT-A7BN-01	Wound Healing (Immune C1)
TCGA-BR-4371-01	IFN-gamma Dominant (Immune C2)
TCGA-B0-5700-01	Inflammatory (Immune C3)
TCGA-97-7552-01	Inflammatory (Immune C3)
TCGA-BF-A5ER-01	Lymphocyte Depleted (Immune C4)
TCGA-JW-A5VI-01	IFN-gamma Dominant (Immune C2)
TCGA-XK-AAJT-01	Lymphocyte Depleted (Immune C4)
TCGA-56-A4BW-01	IFN-gamma Dominant (Immune C2)
TCGA-56-8308-01	Wound Healing (Immune C1)
TCGA-D1-A102-01	Wound Healing (Immune C1)
TCGA-CV-6956-01	IFN-gamma Dominant (Immune C2)
TCGA-AA-3854-01	Wound Healing (Immune C1)
TCGA-AP-A056-01	Wound Healing (Immune C1)
TCGA-DQ-5631-01	Wound Healing (Immune C1)
TCGA-85-8353-01	Wound Healing (Immune C1)
TCGA-36-1580-01	Wound Healing (Immune C1)
TCGA-OL-A66O-01	IFN-gamma Dominant (Immune C2)
TCGA-HP-A5N0-01	Inflammatory (Immune C3)
TCGA-CR-7369-01	IFN-gamma Dominant (Immune C2)
TCGA-55-A48Z-01	Wound Healing (Immune C1)
TCGA-AP-A1E3-01	Wound Healing (Immune C1)
TCGA-SC-A6LP-01	Wound Healing (Immune C1)
TCGA-HT-8558-01	Immunologically Quiet (Immune C5)
TCGA-FD-A43S-01	Inflammatory (Immune C3)
TCGA-5B-A90C-01	IFN-gamma Dominant (Immune C2)
TCGA-EW-A1P0-01	Lymphocyte Depleted (Immune C4)
TCGA-A5-A0GX-01	Inflammatory (Immune C3)
TCGA-QK-A6IG-01	IFN-gamma Dominant (Immune C2)
TCGA-22-4604-01	Wound Healing (Immune C1)
TCGA-BT-A42F-01	IFN-gamma Dominant (Immune C2)
TCGA-61-1900-01	Wound Healing (Immune C1)
TCGA-Y8-A894-01	Inflammatory (Immune C3)
TCGA-S9-A6U8-01	Immunologically Quiet (Immune C5)
TCGA-DC-5337-01	Wound Healing (Immune C1)
TCGA-CV-7261-01	Wound Healing (Immune C1)
TCGA-DJ-A3V7-01	Inflammatory (Immune C3)
TCGA-KL-8345-01	Immunologically Quiet (Immune C5)
TCGA-BP-4998-01	Inflammatory (Immune C3)
TCGA-ZH-A8Y5-01	Inflammatory (Immune C3)
TCGA-EL-A3T9-01	TGF-beta Dominant (Immune C6)
TCGA-OR-A5J2-01	Inflammatory (Immune C3)
TCGA-BR-8363-01	IFN-gamma Dominant (Immune C2)
TCGA-T2-A6X2-01	IFN-gamma Dominant (Immune C2)
TCGA-CR-6492-01	IFN-gamma Dominant (Immune C2)
TCGA-G2-A3IB-01	IFN-gamma Dominant (Immune C2)
TCGA-EW-A1PC-01	IFN-gamma Dominant (Immune C2)
TCGA-BG-A0M3-01	Wound Healing (Immune C1)
TCGA-GM-A2DA-01	Wound Healing (Immune C1)
TCGA-CJ-5675-01	Inflammatory (Immune C3)
TCGA-CU-A3KJ-01	Wound Healing (Immune C1)
TCGA-A7-A0CH-01	Wound Healing (Immune C1)
TCGA-CM-6168-01	Wound Healing (Immune C1)
TCGA-E9-A2JS-01	IFN-gamma Dominant (Immune C2)
TCGA-EA-A1QT-01	IFN-gamma Dominant (Immune C2)
TCGA-L6-A4EP-01	Inflammatory (Immune C3)
TCGA-W4-A7U4-01	IFN-gamma Dominant (Immune C2)
TCGA-4E-A92E-01	IFN-gamma Dominant (Immune C2)
TCGA-HQ-A5ND-01	IFN-gamma Dominant (Immune C2)
TCGA-EL-A3ZL-01	Inflammatory (Immune C3)
TCGA-XY-A8S3-01	IFN-gamma Dominant (Immune C2)
TCGA-75-7031-01	IFN-gamma Dominant (Immune C2)
TCGA-EW-A6SB-01	IFN-gamma Dominant (Immune C2)
TCGA-A5-A1OG-01	IFN-gamma Dominant (Immune C2)
TCGA-44-A47A-01	IFN-gamma Dominant (Immune C2)
TCGA-B6-A0WV-01	Wound Healing (Immune C1)
TCGA-WB-A81J-01	Inflammatory (Immune C3)
TCGA-2G-AAL5-01	Wound Healing (Immune C1)
TCGA-HE-7129-01	Inflammatory (Immune C3)
TCGA-05-4398-01	IFN-gamma Dominant (Immune C2)
TCGA-HD-7753-01	IFN-gamma Dominant (Immune C2)
TCGA-FI-A2EU-01	IFN-gamma Dominant (Immune C2)
TCGA-BA-5559-01	IFN-gamma Dominant (Immune C2)
TCGA-KK-A59X-01	Lymphocyte Depleted (Immune C4)
TCGA-LN-A4MQ-01	Wound Healing (Immune C1)
TCGA-UL-AAZ6-01	IFN-gamma Dominant (Immune C2)
TCGA-B6-A0RG-01	IFN-gamma Dominant (Immune C2)
TCGA-SP-A6QC-01	Lymphocyte Depleted (Immune C4)
TCGA-SJ-A6ZI-01	IFN-gamma Dominant (Immune C2)
TCGA-67-3773-01	Inflammatory (Immune C3)
TCGA-24-1562-01	Wound Healing (Immune C1)
TCGA-VS-AA62-01	IFN-gamma Dominant (Immune C2)
TCGA-EM-A3SU-01	Inflammatory (Immune C3)
TCGA-HT-7874-01	Immunologically Quiet (Immune C5)
TCGA-77-8007-01	Wound Healing (Immune C1)
TCGA-D1-A179-01	Wound Healing (Immune C1)
TCGA-FK-A3SG-01	Inflammatory (Immune C3)
TCGA-77-7463-01	Wound Healing (Immune C1)
TCGA-S9-A6TV-01	Lymphocyte Depleted (Immune C4)
TCGA-BH-A6R9-01	Wound Healing (Immune C1)
TCGA-39-5039-01	Wound Healing (Immune C1)
TCGA-UC-A7PG-01	Wound Healing (Immune C1)
TCGA-DK-A3IS-01	Wound Healing (Immune C1)
TCGA-BR-4363-01	IFN-gamma Dominant (Immune C2)
TCGA-CV-6943-01	IFN-gamma Dominant (Immune C2)
TCGA-64-5781-01	Wound Healing (Immune C1)
TCGA-L5-A4OX-01	IFN-gamma Dominant (Immune C2)
TCGA-UY-A8OD-01	Wound Healing (Immune C1)
TCGA-EO-A2CH-01	IFN-gamma Dominant (Immune C2)
TCGA-CQ-7068-01	IFN-gamma Dominant (Immune C2)
TCGA-VM-A8CD-01	Lymphocyte Depleted (Immune C4)
TCGA-D8-A1JN-01	Inflammatory (Immune C3)
TCGA-CV-5444-01	IFN-gamma Dominant (Immune C2)
TCGA-AR-A24P-01	Wound Healing (Immune C1)
TCGA-EA-A97N-01	IFN-gamma Dominant (Immune C2)
TCGA-LN-A49K-01	IFN-gamma Dominant (Immune C2)
TCGA-SX-A7SM-01	Lymphocyte Depleted (Immune C4)
TCGA-DJ-A4V5-01	Inflammatory (Immune C3)
TCGA-DD-AAEI-01	Lymphocyte Depleted (Immune C4)
TCGA-AZ-4615-01	IFN-gamma Dominant (Immune C2)
TCGA-06-0132-01	Lymphocyte Depleted (Immune C4)
TCGA-VR-A8EO-01	Wound Healing (Immune C1)
TCGA-HT-7616-01	Lymphocyte Depleted (Immune C4)
TCGA-CR-7395-01	IFN-gamma Dominant (Immune C2)
TCGA-DJ-A2PS-01	Inflammatory (Immune C3)
TCGA-BR-7196-01	IFN-gamma Dominant (Immune C2)
TCGA-AA-A02H-01	Wound Healing (Immune C1)
TCGA-AP-A0LL-01	Inflammatory (Immune C3)
TCGA-BP-4777-01	Inflammatory (Immune C3)
TCGA-24-2290-01	Lymphocyte Depleted (Immune C4)
TCGA-ET-A39J-01	Lymphocyte Depleted (Immune C4)
TCGA-E9-A1N9-01	Wound Healing (Immune C1)
TCGA-B6-A0I9-01	Wound Healing (Immune C1)
TCGA-CN-6022-01	Wound Healing (Immune C1)
TCGA-E8-A242-01	Inflammatory (Immune C3)
TCGA-DJ-A2Q5-01	Inflammatory (Immune C3)
TCGA-DW-7963-01	Inflammatory (Immune C3)
TCGA-E2-A1L9-01	IFN-gamma Dominant (Immune C2)
TCGA-NC-A5HE-01	IFN-gamma Dominant (Immune C2)
TCGA-BP-4797-01	Inflammatory (Immune C3)
TCGA-E5-A4U1-01	Wound Healing (Immune C1)
TCGA-OE-A75W-01	Wound Healing (Immune C1)
TCGA-DX-AB3C-01	Wound Healing (Immune C1)
TCGA-BP-4762-01	Inflammatory (Immune C3)
TCGA-AR-A1AP-01	IFN-gamma Dominant (Immune C2)
TCGA-KT-A7W1-01	Lymphocyte Depleted (Immune C4)
TCGA-44-3919-01	IFN-gamma Dominant (Immune C2)
TCGA-39-5035-01	IFN-gamma Dominant (Immune C2)
TCGA-CV-6952-01	IFN-gamma Dominant (Immune C2)
TCGA-BR-4367-01	IFN-gamma Dominant (Immune C2)
TCGA-CN-A63T-01	IFN-gamma Dominant (Immune C2)
TCGA-BH-A0H5-01	TGF-beta Dominant (Immune C6)
TCGA-OK-A5Q2-01	Inflammatory (Immune C3)
TCGA-B5-A0K9-01	Wound Healing (Immune C1)
TCGA-CV-A45P-01	IFN-gamma Dominant (Immune C2)
TCGA-BH-A0E6-01	Wound Healing (Immune C1)
TCGA-D8-A1JA-01	Lymphocyte Depleted (Immune C4)
TCGA-56-7221-01	IFN-gamma Dominant (Immune C2)
TCGA-4G-AAZT-01	Inflammatory (Immune C3)
TCGA-VR-A8EX-01	IFN-gamma Dominant (Immune C2)
TCGA-B0-4844-01	IFN-gamma Dominant (Immune C2)
TCGA-P5-A5F2-01	Immunologically Quiet (Immune C5)
TCGA-BP-4352-01	Wound Healing (Immune C1)
TCGA-99-8032-01	Wound Healing (Immune C1)
TCGA-BH-A0BW-01	IFN-gamma Dominant (Immune C2)
TCGA-DW-7841-01	Inflammatory (Immune C3)
TCGA-H7-8502-01	IFN-gamma Dominant (Immune C2)
TCGA-CV-A6JN-01	IFN-gamma Dominant (Immune C2)
TCGA-OR-A5LN-01	Inflammatory (Immune C3)
TCGA-BH-A0HB-01	IFN-gamma Dominant (Immune C2)
TCGA-AG-3609-01	IFN-gamma Dominant (Immune C2)
TCGA-29-1695-01	Lymphocyte Depleted (Immune C4)
TCGA-H2-A2K9-01	Inflammatory (Immune C3)
TCGA-G9-7509-01	Inflammatory (Immune C3)
TCGA-FV-A2QR-01	Inflammatory (Immune C3)
TCGA-19-2629-01	Lymphocyte Depleted (Immune C4)
TCGA-B2-4098-01	Inflammatory (Immune C3)
TCGA-D7-8575-01	Inflammatory (Immune C3)
TCGA-HT-7607-01	Immunologically Quiet (Immune C5)
TCGA-CR-7380-01	IFN-gamma Dominant (Immune C2)
TCGA-43-2576-01	Wound Healing (Immune C1)
TCGA-DJ-A2PW-01	IFN-gamma Dominant (Immune C2)
TCGA-N8-A56S-01	Wound Healing (Immune C1)
TCGA-BR-8367-01	Wound Healing (Immune C1)
TCGA-ET-A3BW-01	Inflammatory (Immune C3)
TCGA-06-0238-01	Lymphocyte Depleted (Immune C4)
TCGA-FB-AAQ3-01	IFN-gamma Dominant (Immune C2)
TCGA-CJ-5679-01	Inflammatory (Immune C3)
TCGA-C5-A8YR-01	IFN-gamma Dominant (Immune C2)
TCGA-AQ-A54O-01	Wound Healing (Immune C1)
TCGA-V1-A9Z7-01	Wound Healing (Immune C1)
TCGA-KL-8346-01	Inflammatory (Immune C3)
TCGA-FE-A239-01	Inflammatory (Immune C3)
TCGA-DQ-7594-01	IFN-gamma Dominant (Immune C2)
TCGA-XF-A8HF-01	Wound Healing (Immune C1)
TCGA-KQ-A41P-01	Wound Healing (Immune C1)
TCGA-DX-A8BH-01	IFN-gamma Dominant (Immune C2)
TCGA-DD-AACT-01	Inflammatory (Immune C3)
TCGA-BL-A13I-01	Lymphocyte Depleted (Immune C4)
TCGA-DX-A7EU-01	Inflammatory (Immune C3)
TCGA-B6-A0WZ-01	IFN-gamma Dominant (Immune C2)
TCGA-C8-A135-01	Wound Healing (Immune C1)
TCGA-39-5027-01	Wound Healing (Immune C1)
TCGA-HD-7917-01	IFN-gamma Dominant (Immune C2)
TCGA-A5-A0VQ-01	Wound Healing (Immune C1)
TCGA-22-5485-01	Lymphocyte Depleted (Immune C4)
TCGA-EL-A4K1-01	Inflammatory (Immune C3)
TCGA-H4-A2HQ-01	IFN-gamma Dominant (Immune C2)
TCGA-AK-3427-01	Lymphocyte Depleted (Immune C4)
TCGA-DJ-A2PX-01	Inflammatory (Immune C3)
TCGA-BH-A0BJ-01	Inflammatory (Immune C3)
TCGA-BH-A203-01	Wound Healing (Immune C1)
TCGA-BG-A0M0-01	Wound Healing (Immune C1)
TCGA-24-1419-01	IFN-gamma Dominant (Immune C2)
TCGA-AG-3583-01	Wound Healing (Immune C1)
TCGA-V4-A9F7-01	Lymphocyte Depleted (Immune C4)
TCGA-GL-A9DD-01	Inflammatory (Immune C3)
TCGA-13-A5FT-01	IFN-gamma Dominant (Immune C2)
TCGA-WB-A81M-01	Lymphocyte Depleted (Immune C4)
TCGA-HT-7873-01	Immunologically Quiet (Immune C5)
TCGA-55-A491-01	IFN-gamma Dominant (Immune C2)
TCGA-FY-A3NM-01	Inflammatory (Immune C3)
TCGA-06-0749-01	Lymphocyte Depleted (Immune C4)
TCGA-ND-A4WF-01	Wound Healing (Immune C1)
TCGA-AZ-4681-01	Wound Healing (Immune C1)
TCGA-46-6025-01	IFN-gamma Dominant (Immune C2)
TCGA-FE-A236-01	Lymphocyte Depleted (Immune C4)
TCGA-ZF-AA4W-01	IFN-gamma Dominant (Immune C2)
TCGA-UY-A9PA-01	IFN-gamma Dominant (Immune C2)
TCGA-AA-3968-01	Wound Healing (Immune C1)
TCGA-BG-A0MO-01	IFN-gamma Dominant (Immune C2)
TCGA-HT-7603-01	Immunologically Quiet (Immune C5)
TCGA-AJ-A2QN-01	Wound Healing (Immune C1)
TCGA-AJ-A3NF-01	IFN-gamma Dominant (Immune C2)
TCGA-FU-A40J-01	IFN-gamma Dominant (Immune C2)
TCGA-B9-4116-01	Inflammatory (Immune C3)
TCGA-BH-A0C7-01	IFN-gamma Dominant (Immune C2)
TCGA-50-6595-01	IFN-gamma Dominant (Immune C2)
TCGA-DB-A64P-01	Immunologically Quiet (Immune C5)
TCGA-BP-4981-01	Inflammatory (Immune C3)
TCGA-VS-A9V5-01	Wound Healing (Immune C1)
TCGA-AK-3428-01	Inflammatory (Immune C3)
TCGA-CR-7373-01	IFN-gamma Dominant (Immune C2)
TCGA-G4-6311-01	Wound Healing (Immune C1)
TCGA-BH-A8FZ-01	IFN-gamma Dominant (Immune C2)
TCGA-S3-AA17-01	IFN-gamma Dominant (Immune C2)
TCGA-DF-A2L0-01	IFN-gamma Dominant (Immune C2)
TCGA-CI-6619-01	Wound Healing (Immune C1)
TCGA-B7-A5TI-01	Wound Healing (Immune C1)
TCGA-D8-A13Z-01	IFN-gamma Dominant (Immune C2)
TCGA-BA-5152-01	IFN-gamma Dominant (Immune C2)
TCGA-DD-AAEE-01	Lymphocyte Depleted (Immune C4)
TCGA-A4-7997-01	Lymphocyte Depleted (Immune C4)
TCGA-DX-A48O-01	Inflammatory (Immune C3)
TCGA-A7-A6VX-01	IFN-gamma Dominant (Immune C2)
TCGA-VS-A8Q9-01	IFN-gamma Dominant (Immune C2)
TCGA-60-2713-01	Wound Healing (Immune C1)
TCGA-GU-A42Q-01	Wound Healing (Immune C1)
TCGA-95-A4VP-01	Inflammatory (Immune C3)
TCGA-BP-4340-01	Inflammatory (Immune C3)
TCGA-HC-8261-01	Inflammatory (Immune C3)
TCGA-85-A512-01	Wound Healing (Immune C1)
TCGA-ET-A25P-01	Inflammatory (Immune C3)
TCGA-DJ-A3VI-01	Inflammatory (Immune C3)
TCGA-55-8302-01	IFN-gamma Dominant (Immune C2)
TCGA-44-4112-01	Wound Healing (Immune C1)
TCGA-EJ-A65E-01	Inflammatory (Immune C3)
TCGA-AF-3911-01	Wound Healing (Immune C1)
TCGA-UF-A7JJ-01	IFN-gamma Dominant (Immune C2)
TCGA-05-4430-01	IFN-gamma Dominant (Immune C2)
TCGA-AR-A255-01	IFN-gamma Dominant (Immune C2)
TCGA-WB-A81F-01	Inflammatory (Immune C3)
TCGA-V4-A9EQ-01	Lymphocyte Depleted (Immune C4)
TCGA-HZ-7919-01	Wound Healing (Immune C1)
TCGA-CN-5366-01	IFN-gamma Dominant (Immune C2)
TCGA-AR-A1AT-01	IFN-gamma Dominant (Immune C2)
TCGA-E5-A2PC-01	IFN-gamma Dominant (Immune C2)
TCGA-AD-6899-01	Wound Healing (Immune C1)
TCGA-YL-A8HM-01	IFN-gamma Dominant (Immune C2)
TCGA-CD-A486-01	IFN-gamma Dominant (Immune C2)
TCGA-UY-A9PE-01	Wound Healing (Immune C1)
TCGA-CQ-7071-01	IFN-gamma Dominant (Immune C2)
TCGA-D1-A3DG-01	Wound Healing (Immune C1)
TCGA-VQ-A8PX-01	IFN-gamma Dominant (Immune C2)
TCGA-XF-A9SV-01	Wound Healing (Immune C1)
TCGA-24-1924-01	IFN-gamma Dominant (Immune C2)
TCGA-DX-A6BG-01	Wound Healing (Immune C1)
TCGA-E7-A6MF-01	Inflammatory (Immune C3)
TCGA-MM-A84U-01	Inflammatory (Immune C3)
TCGA-CV-6933-01	Wound Healing (Immune C1)
TCGA-E2-A1B0-01	Wound Healing (Immune C1)
TCGA-DS-A0VL-01	IFN-gamma Dominant (Immune C2)
TCGA-63-6202-01	IFN-gamma Dominant (Immune C2)
TCGA-BF-AAP2-01	IFN-gamma Dominant (Immune C2)
TCGA-46-3767-01	Wound Healing (Immune C1)
TCGA-2G-AALO-01	Inflammatory (Immune C3)
TCGA-EM-A4FQ-01	Inflammatory (Immune C3)
TCGA-B0-5095-01	Inflammatory (Immune C3)
TCGA-CI-6622-01	Wound Healing (Immune C1)
TCGA-BP-4167-01	Inflammatory (Immune C3)
TCGA-AG-3601-01	Wound Healing (Immune C1)
TCGA-ZP-A9D2-01	IFN-gamma Dominant (Immune C2)
TCGA-BH-A18R-01	Wound Healing (Immune C1)
TCGA-BA-7269-01	Wound Healing (Immune C1)
TCGA-CG-4466-01	Wound Healing (Immune C1)
TCGA-HU-A4G3-01	Wound Healing (Immune C1)
TCGA-OR-A5KY-01	Lymphocyte Depleted (Immune C4)
TCGA-NH-A6GC-01	Wound Healing (Immune C1)
TCGA-DX-A48K-01	Wound Healing (Immune C1)
TCGA-DD-A73B-01	Lymphocyte Depleted (Immune C4)
TCGA-AC-A4ZE-01	Inflammatory (Immune C3)
TCGA-P5-A5F1-01	Lymphocyte Depleted (Immune C4)
TCGA-DK-AA6X-01	IFN-gamma Dominant (Immune C2)
TCGA-EO-A22T-01	Wound Healing (Immune C1)
TCGA-BR-7722-01	Inflammatory (Immune C3)
TCGA-BI-A0VR-01	IFN-gamma Dominant (Immune C2)
TCGA-A6-3808-01	Wound Healing (Immune C1)
TCGA-33-AAS8-01	Wound Healing (Immune C1)
TCGA-AR-A24H-01	IFN-gamma Dominant (Immune C2)
TCGA-F4-6570-01	Wound Healing (Immune C1)
TCGA-E8-A432-01	Inflammatory (Immune C3)
TCGA-MZ-A5BI-01	IFN-gamma Dominant (Immune C2)
TCGA-EJ-8474-01	Inflammatory (Immune C3)
TCGA-DU-7011-01	Immunologically Quiet (Immune C5)
TCGA-06-5414-01	Lymphocyte Depleted (Immune C4)
TCGA-J9-A8CP-01	Inflammatory (Immune C3)
TCGA-ZF-A9R9-01	Inflammatory (Immune C3)
TCGA-P8-A6RX-01	Inflammatory (Immune C3)
TCGA-JY-A6FE-01	IFN-gamma Dominant (Immune C2)
TCGA-A8-A099-01	Inflammatory (Immune C3)
TCGA-CM-6679-01	Wound Healing (Immune C1)
TCGA-KL-8342-01	Inflammatory (Immune C3)
TCGA-XF-A8HB-01	TGF-beta Dominant (Immune C6)
TCGA-HT-8019-01	Immunologically Quiet (Immune C5)
TCGA-HV-A5A4-01	IFN-gamma Dominant (Immune C2)
TCGA-DC-6157-01	Wound Healing (Immune C1)
TCGA-NQ-A638-01	Wound Healing (Immune C1)
TCGA-VS-A9UU-01	IFN-gamma Dominant (Immune C2)
TCGA-66-2790-01	IFN-gamma Dominant (Immune C2)
TCGA-V1-A8WS-01	Wound Healing (Immune C1)
TCGA-CE-A3MD-01	Inflammatory (Immune C3)
TCGA-HU-A4GD-01	IFN-gamma Dominant (Immune C2)
TCGA-94-7033-01	IFN-gamma Dominant (Immune C2)
TCGA-VQ-A94U-01	Wound Healing (Immune C1)
TCGA-LK-A4O0-01	Wound Healing (Immune C1)
TCGA-XD-AAUG-01	Wound Healing (Immune C1)
TCGA-FV-A4ZP-01	Lymphocyte Depleted (Immune C4)
TCGA-KN-8435-01	Inflammatory (Immune C3)
TCGA-P5-A77X-01	Immunologically Quiet (Immune C5)
TCGA-NC-A5HI-01	Wound Healing (Immune C1)
TCGA-ZJ-AAXN-01	IFN-gamma Dominant (Immune C2)
TCGA-BP-4781-01	Inflammatory (Immune C3)
TCGA-CV-6937-01	Wound Healing (Immune C1)
TCGA-AJ-A3QS-01	IFN-gamma Dominant (Immune C2)
TCGA-DD-AACS-01	Lymphocyte Depleted (Immune C4)
TCGA-MT-A67F-01	IFN-gamma Dominant (Immune C2)
TCGA-VS-A9U6-01	IFN-gamma Dominant (Immune C2)
TCGA-EB-A6QZ-01	Lymphocyte Depleted (Immune C4)
TCGA-5P-A9KF-01	Inflammatory (Immune C3)
TCGA-EB-A1NK-01	Wound Healing (Immune C1)
TCGA-RY-A843-01	Immunologically Quiet (Immune C5)
TCGA-A8-A09R-01	Wound Healing (Immune C1)
TCGA-DK-AA6S-01	Wound Healing (Immune C1)
TCGA-V1-A9Z8-01	Inflammatory (Immune C3)
TCGA-DD-A4NK-01	Inflammatory (Immune C3)
TCGA-CM-4750-01	IFN-gamma Dominant (Immune C2)
TCGA-VQ-A8PJ-01	Wound Healing (Immune C1)
TCGA-KQ-A41S-01	Wound Healing (Immune C1)
TCGA-4Z-AA7O-01	Wound Healing (Immune C1)
TCGA-55-8507-01	Wound Healing (Immune C1)
TCGA-DJ-A3UN-01	Inflammatory (Immune C3)
TCGA-HW-7493-01	Immunologically Quiet (Immune C5)
TCGA-BG-A0MC-01	Inflammatory (Immune C3)
TCGA-D6-6516-01	IFN-gamma Dominant (Immune C2)
TCGA-C5-A2LX-01	IFN-gamma Dominant (Immune C2)
TCGA-CR-6471-01	IFN-gamma Dominant (Immune C2)
TCGA-VM-A8CA-01	Immunologically Quiet (Immune C5)
TCGA-D1-A17M-01	IFN-gamma Dominant (Immune C2)
TCGA-D8-A27G-01	Wound Healing (Immune C1)
TCGA-B0-5699-01	Inflammatory (Immune C3)
TCGA-AA-3845-01	IFN-gamma Dominant (Immune C2)
TCGA-A5-A0GH-01	Wound Healing (Immune C1)
TCGA-XQ-A8TB-01	Inflammatory (Immune C3)
TCGA-37-5819-01	Wound Healing (Immune C1)
TCGA-DU-7015-01	Immunologically Quiet (Immune C5)
TCGA-MQ-A4LJ-01	Wound Healing (Immune C1)
TCGA-C5-A1M8-01	IFN-gamma Dominant (Immune C2)
TCGA-C5-A7CJ-01	IFN-gamma Dominant (Immune C2)
TCGA-AA-3980-01	IFN-gamma Dominant (Immune C2)
TCGA-22-A5C4-01	Wound Healing (Immune C1)
TCGA-HB-A2OT-01	Lymphocyte Depleted (Immune C4)
TCGA-85-A4CL-01	Wound Healing (Immune C1)
TCGA-TM-A7C5-01	Immunologically Quiet (Immune C5)
TCGA-06-0184-01	Lymphocyte Depleted (Immune C4)
TCGA-ZF-AA56-01	IFN-gamma Dominant (Immune C2)
TCGA-BP-4801-01	Inflammatory (Immune C3)
TCGA-D8-A1XC-01	Inflammatory (Immune C3)
TCGA-DU-8162-01	Immunologically Quiet (Immune C5)
TCGA-TM-A84O-01	Immunologically Quiet (Immune C5)
TCGA-06-5410-01	Lymphocyte Depleted (Immune C4)
TCGA-DC-6158-01	IFN-gamma Dominant (Immune C2)
TCGA-HT-A4DS-01	Lymphocyte Depleted (Immune C4)
TCGA-69-8254-01	Inflammatory (Immune C3)
TCGA-AA-A00N-01	Wound Healing (Immune C1)
TCGA-EM-A3FM-01	Inflammatory (Immune C3)
TCGA-GH-A9DA-01	Wound Healing (Immune C1)
TCGA-TN-A7HL-01	IFN-gamma Dominant (Immune C2)
TCGA-3B-A9HT-01	IFN-gamma Dominant (Immune C2)
TCGA-CN-4742-01	IFN-gamma Dominant (Immune C2)
TCGA-AA-3984-01	IFN-gamma Dominant (Immune C2)
TCGA-FY-A3R7-01	Inflammatory (Immune C3)
TCGA-BH-A1FJ-01	IFN-gamma Dominant (Immune C2)
TCGA-DD-AACX-01	Lymphocyte Depleted (Immune C4)
TCGA-78-8640-01	IFN-gamma Dominant (Immune C2)
TCGA-DJ-A3UY-01	Inflammatory (Immune C3)
TCGA-EW-A1PE-01	IFN-gamma Dominant (Immune C2)
TCGA-E2-A1II-01	IFN-gamma Dominant (Immune C2)
TCGA-S3-AA14-01	Wound Healing (Immune C1)
TCGA-CR-7392-01	IFN-gamma Dominant (Immune C2)
TCGA-CV-7100-01	IFN-gamma Dominant (Immune C2)
TCGA-60-2714-01	IFN-gamma Dominant (Immune C2)
TCGA-2G-AAFO-01	IFN-gamma Dominant (Immune C2)
TCGA-AR-A5QP-01	Wound Healing (Immune C1)
TCGA-NF-A4WX-01	Wound Healing (Immune C1)
TCGA-K6-A3WQ-01	IFN-gamma Dominant (Immune C2)
TCGA-E9-A6HE-01	IFN-gamma Dominant (Immune C2)
TCGA-BR-8291-01	Inflammatory (Immune C3)
TCGA-DD-AADA-01	Inflammatory (Immune C3)
TCGA-TQ-A7RN-01	Immunologically Quiet (Immune C5)
TCGA-ZM-AA0B-01	IFN-gamma Dominant (Immune C2)
TCGA-GL-A9DE-01	Lymphocyte Depleted (Immune C4)
TCGA-QR-A70O-01	Inflammatory (Immune C3)
TCGA-BH-A0HI-01	Wound Healing (Immune C1)
TCGA-XE-AANI-01	Wound Healing (Immune C1)
TCGA-ET-A3DT-01	Inflammatory (Immune C3)
TCGA-F4-6806-01	Wound Healing (Immune C1)
TCGA-DD-A1EI-01	Wound Healing (Immune C1)
TCGA-AP-A0LG-01	Wound Healing (Immune C1)
TCGA-NH-A50U-01	IFN-gamma Dominant (Immune C2)
TCGA-BP-4790-01	Inflammatory (Immune C3)
TCGA-AX-A1C8-01	IFN-gamma Dominant (Immune C2)
TCGA-BP-5008-01	Inflammatory (Immune C3)
TCGA-P8-A6RY-01	Lymphocyte Depleted (Immune C4)
TCGA-AJ-A3BK-01	IFN-gamma Dominant (Immune C2)
TCGA-CR-6480-01	IFN-gamma Dominant (Immune C2)
TCGA-AA-3692-01	Wound Healing (Immune C1)
TCGA-AF-2693-01	Wound Healing (Immune C1)
TCGA-D5-6924-01	Wound Healing (Immune C1)
TCGA-28-2513-01	Lymphocyte Depleted (Immune C4)
TCGA-EW-A1P1-01	Wound Healing (Immune C1)
TCGA-AA-A01R-01	IFN-gamma Dominant (Immune C2)
TCGA-V4-A9EF-01	Lymphocyte Depleted (Immune C4)
TCGA-JU-AAVI-01	IFN-gamma Dominant (Immune C2)
TCGA-QR-A70R-01	Inflammatory (Immune C3)
TCGA-OL-A66P-01	IFN-gamma Dominant (Immune C2)
TCGA-NG-A4VW-01	Wound Healing (Immune C1)
TCGA-CG-4462-01	TGF-beta Dominant (Immune C6)
TCGA-A2-A1G4-01	Wound Healing (Immune C1)
TCGA-E2-A105-01	Wound Healing (Immune C1)
TCGA-55-7573-01	Inflammatory (Immune C3)
TCGA-N5-A4RA-01	Wound Healing (Immune C1)
TCGA-E6-A1LZ-01	Wound Healing (Immune C1)
TCGA-L5-A4OR-01	Wound Healing (Immune C1)
TCGA-EY-A2OM-01	Wound Healing (Immune C1)
TCGA-CV-A45W-01	IFN-gamma Dominant (Immune C2)
TCGA-EJ-5502-01	Inflammatory (Immune C3)
TCGA-B0-5085-01	Inflammatory (Immune C3)
TCGA-2L-AAQL-01	TGF-beta Dominant (Immune C6)
TCGA-D1-A17F-01	IFN-gamma Dominant (Immune C2)
TCGA-HC-8265-01	Wound Healing (Immune C1)
TCGA-AD-6965-01	Wound Healing (Immune C1)
TCGA-BJ-A3PR-01	IFN-gamma Dominant (Immune C2)
TCGA-SH-A7BD-01	IFN-gamma Dominant (Immune C2)
TCGA-H2-A422-01	Inflammatory (Immune C3)
TCGA-EY-A549-01	Inflammatory (Immune C3)
TCGA-DX-A6YU-01	TGF-beta Dominant (Immune C6)
TCGA-P5-A735-01	Immunologically Quiet (Immune C5)
TCGA-VQ-A928-01	Wound Healing (Immune C1)
TCGA-D5-6931-01	Wound Healing (Immune C1)
TCGA-DX-A6Z2-01	Inflammatory (Immune C3)
TCGA-BS-A0V6-01	IFN-gamma Dominant (Immune C2)
TCGA-BC-A10T-01	Wound Healing (Immune C1)
TCGA-AA-3872-01	Wound Healing (Immune C1)
TCGA-43-5668-01	IFN-gamma Dominant (Immune C2)
TCGA-R8-A6ML-01	Immunologically Quiet (Immune C5)
TCGA-FB-AAQ0-01	IFN-gamma Dominant (Immune C2)
TCGA-BF-AAP1-01	Lymphocyte Depleted (Immune C4)
TCGA-A2-A0EV-01	IFN-gamma Dominant (Immune C2)
TCGA-HT-7691-01	Immunologically Quiet (Immune C5)
TCGA-18-4083-01	Wound Healing (Immune C1)
TCGA-FG-A6J1-01	Lymphocyte Depleted (Immune C4)
TCGA-CV-7104-01	IFN-gamma Dominant (Immune C2)
TCGA-EO-A22S-01	Wound Healing (Immune C1)
TCGA-A8-A08A-01	Inflammatory (Immune C3)
TCGA-D1-A17B-01	Inflammatory (Immune C3)
TCGA-CD-8526-01	IFN-gamma Dominant (Immune C2)
TCGA-BR-7703-01	IFN-gamma Dominant (Immune C2)
TCGA-W8-A86G-01	Inflammatory (Immune C3)
TCGA-AL-3471-01	Inflammatory (Immune C3)
TCGA-MH-A854-01	Wound Healing (Immune C1)
TCGA-YF-AA3M-01	Wound Healing (Immune C1)
TCGA-76-4929-01	Lymphocyte Depleted (Immune C4)
TCGA-2Y-A9H6-01	Inflammatory (Immune C3)
TCGA-44-2656-01	IFN-gamma Dominant (Immune C2)
TCGA-A6-5656-01	Wound Healing (Immune C1)
TCGA-43-8115-01	Wound Healing (Immune C1)
TCGA-3A-A9IX-01	Inflammatory (Immune C3)
TCGA-EI-6884-01	Wound Healing (Immune C1)
TCGA-DU-6402-01	Lymphocyte Depleted (Immune C4)
TCGA-AG-3890-01	Wound Healing (Immune C1)
TCGA-Q1-A73P-01	IFN-gamma Dominant (Immune C2)
TCGA-39-5016-01	IFN-gamma Dominant (Immune C2)
TCGA-HT-7684-01	Immunologically Quiet (Immune C5)
TCGA-D8-A1XL-01	IFN-gamma Dominant (Immune C2)
TCGA-E8-A413-01	Inflammatory (Immune C3)
TCGA-BA-6871-01	IFN-gamma Dominant (Immune C2)
TCGA-HT-8104-01	Lymphocyte Depleted (Immune C4)
TCGA-CN-6017-01	IFN-gamma Dominant (Immune C2)
TCGA-CC-A7IH-01	Inflammatory (Immune C3)
TCGA-D7-A747-01	IFN-gamma Dominant (Immune C2)
TCGA-A4-7585-01	Inflammatory (Immune C3)
TCGA-TS-A7P6-01	Wound Healing (Immune C1)
TCGA-BG-A0W2-01	Wound Healing (Immune C1)
TCGA-DD-A4NG-01	Inflammatory (Immune C3)
TCGA-BP-5170-01	Inflammatory (Immune C3)
TCGA-FN-7833-01	Lymphocyte Depleted (Immune C4)
TCGA-KN-8436-01	Inflammatory (Immune C3)
TCGA-C5-A8XK-01	IFN-gamma Dominant (Immune C2)
TCGA-43-A474-01	Wound Healing (Immune C1)
TCGA-HT-7473-01	Lymphocyte Depleted (Immune C4)
TCGA-06-0645-01	Lymphocyte Depleted (Immune C4)
TCGA-33-AASI-01	Wound Healing (Immune C1)
TCGA-DM-A1DA-01	Wound Healing (Immune C1)
TCGA-IB-7647-01	Wound Healing (Immune C1)
TCGA-BJ-A2N9-01	Inflammatory (Immune C3)
TCGA-41-2572-01	Lymphocyte Depleted (Immune C4)
TCGA-AG-3885-01	Inflammatory (Immune C3)
TCGA-CF-A7I0-01	Wound Healing (Immune C1)
TCGA-EK-A3GN-01	IFN-gamma Dominant (Immune C2)
TCGA-WJ-A86L-01	Lymphocyte Depleted (Immune C4)
TCGA-DX-AB2X-01	Lymphocyte Depleted (Immune C4)
TCGA-MJ-A850-01	Wound Healing (Immune C1)
TCGA-C5-A907-01	IFN-gamma Dominant (Immune C2)
TCGA-49-4506-01	IFN-gamma Dominant (Immune C2)
TCGA-B0-5713-01	Inflammatory (Immune C3)
TCGA-BQ-5877-01	Inflammatory (Immune C3)
TCGA-D1-A160-01	Wound Healing (Immune C1)
TCGA-BR-6564-01	IFN-gamma Dominant (Immune C2)
TCGA-B2-5633-01	Inflammatory (Immune C3)
TCGA-BH-A0BZ-01	IFN-gamma Dominant (Immune C2)
TCGA-XF-AAMX-01	Wound Healing (Immune C1)
TCGA-OR-A5LR-01	Inflammatory (Immune C3)
TCGA-A2-A0ER-01	Wound Healing (Immune C1)
TCGA-IG-A8O2-01	IFN-gamma Dominant (Immune C2)
TCGA-AX-A1C7-01	IFN-gamma Dominant (Immune C2)
TCGA-TQ-A7RU-01	Immunologically Quiet (Immune C5)
TCGA-BP-4982-01	Inflammatory (Immune C3)
TCGA-JY-A938-01	IFN-gamma Dominant (Immune C2)
TCGA-XF-A9T8-01	IFN-gamma Dominant (Immune C2)
TCGA-2G-AAG0-01	IFN-gamma Dominant (Immune C2)
TCGA-EO-A22X-01	Wound Healing (Immune C1)
TCGA-DD-A4ND-01	Inflammatory (Immune C3)
TCGA-B8-5162-01	Inflammatory (Immune C3)
TCGA-66-2785-01	IFN-gamma Dominant (Immune C2)
TCGA-25-1630-01	Lymphocyte Depleted (Immune C4)
TCGA-OL-A66K-01	Inflammatory (Immune C3)
TCGA-P4-A5E8-01	Inflammatory (Immune C3)
TCGA-Q9-A6FW-01	Wound Healing (Immune C1)
TCGA-IN-7806-01	Inflammatory (Immune C3)
TCGA-36-1574-01	IFN-gamma Dominant (Immune C2)
TCGA-QK-A8Z8-01	IFN-gamma Dominant (Immune C2)
TCGA-CQ-5326-01	IFN-gamma Dominant (Immune C2)
TCGA-DB-A4XF-01	Immunologically Quiet (Immune C5)
TCGA-2Y-A9H2-01	Inflammatory (Immune C3)
TCGA-C5-A7CM-01	Wound Healing (Immune C1)
TCGA-4K-AAAL-01	IFN-gamma Dominant (Immune C2)
TCGA-A4-A5Y1-01	Inflammatory (Immune C3)
TCGA-56-8201-01	Wound Healing (Immune C1)
TCGA-G9-6342-01	Inflammatory (Immune C3)
TCGA-KU-A66T-01	IFN-gamma Dominant (Immune C2)
TCGA-DD-AAVW-01	Inflammatory (Immune C3)
TCGA-CJ-4905-01	Inflammatory (Immune C3)
TCGA-EP-A2KC-01	Lymphocyte Depleted (Immune C4)
TCGA-MT-A51W-01	IFN-gamma Dominant (Immune C2)
TCGA-LN-A7HY-01	Wound Healing (Immune C1)
TCGA-FY-A3R8-01	Inflammatory (Immune C3)
TCGA-WB-A81H-01	Inflammatory (Immune C3)
TCGA-G7-6790-01	Inflammatory (Immune C3)
TCGA-XY-A89B-01	IFN-gamma Dominant (Immune C2)
TCGA-CC-A7IL-01	Lymphocyte Depleted (Immune C4)
TCGA-EW-A1OX-01	Lymphocyte Depleted (Immune C4)
TCGA-EL-A3T1-01	IFN-gamma Dominant (Immune C2)
TCGA-55-A48X-01	Inflammatory (Immune C3)
TCGA-YZ-A984-01	Inflammatory (Immune C3)
TCGA-BP-5174-01	Inflammatory (Immune C3)
TCGA-KN-8427-01	Wound Healing (Immune C1)
TCGA-QR-A705-01	Inflammatory (Immune C3)
TCGA-20-1684-01	IFN-gamma Dominant (Immune C2)
TCGA-N8-A4PI-01	Lymphocyte Depleted (Immune C4)
TCGA-05-4402-01	IFN-gamma Dominant (Immune C2)
TCGA-2G-AAH4-01	Wound Healing (Immune C1)
TCGA-CX-7086-01	IFN-gamma Dominant (Immune C2)
TCGA-ET-A25L-01	Inflammatory (Immune C3)
TCGA-UZ-A9PZ-01	Inflammatory (Immune C3)
TCGA-AG-3881-01	Wound Healing (Immune C1)
TCGA-A8-A0A9-01	IFN-gamma Dominant (Immune C2)
TCGA-DE-A2OL-01	Inflammatory (Immune C3)
TCGA-G7-A4TM-01	Inflammatory (Immune C3)
TCGA-BQ-7060-01	Inflammatory (Immune C3)
TCGA-DD-A4NS-01	Inflammatory (Immune C3)
TCGA-B0-4697-01	Inflammatory (Immune C3)
TCGA-QR-A6GO-01	Lymphocyte Depleted (Immune C4)
TCGA-AX-A3FS-01	IFN-gamma Dominant (Immune C2)
TCGA-S9-A6WP-01	Immunologically Quiet (Immune C5)
TCGA-BH-A1FB-01	Inflammatory (Immune C3)
TCGA-44-8119-01	Wound Healing (Immune C1)
TCGA-BP-4759-01	TGF-beta Dominant (Immune C6)
TCGA-FG-A713-01	Immunologically Quiet (Immune C5)
TCGA-DI-A1BY-01	Wound Healing (Immune C1)
TCGA-V4-A9EZ-01	Lymphocyte Depleted (Immune C4)
TCGA-VS-A9V2-01	IFN-gamma Dominant (Immune C2)
TCGA-VS-A94Y-01	Wound Healing (Immune C1)
TCGA-F4-6461-01	Wound Healing (Immune C1)
TCGA-90-A4EE-01	IFN-gamma Dominant (Immune C2)
TCGA-C5-A8ZZ-01	IFN-gamma Dominant (Immune C2)
TCGA-MQ-A6BS-01	Inflammatory (Immune C3)
TCGA-B5-A11G-01	IFN-gamma Dominant (Immune C2)
TCGA-HT-A5RA-01	Lymphocyte Depleted (Immune C4)
TCGA-E1-A7YL-01	Lymphocyte Depleted (Immune C4)
TCGA-AO-A0JC-01	IFN-gamma Dominant (Immune C2)
TCGA-JW-A852-01	IFN-gamma Dominant (Immune C2)
TCGA-BB-4224-01	IFN-gamma Dominant (Immune C2)
TCGA-CJ-6030-01	Inflammatory (Immune C3)
TCGA-A3-3319-01	Inflammatory (Immune C3)
TCGA-VQ-AA68-01	IFN-gamma Dominant (Immune C2)
TCGA-UD-AAC5-01	Wound Healing (Immune C1)
TCGA-DD-AADI-01	IFN-gamma Dominant (Immune C2)
TCGA-V4-A9F0-01	Inflammatory (Immune C3)
TCGA-FC-7961-01	Inflammatory (Immune C3)
TCGA-CC-A7IG-01	Wound Healing (Immune C1)
TCGA-MR-A8JO-01	Inflammatory (Immune C3)
TCGA-GC-A3YS-01	Wound Healing (Immune C1)
TCGA-OR-A5LG-01	Lymphocyte Depleted (Immune C4)
TCGA-VD-A8KH-01	Lymphocyte Depleted (Immune C4)
TCGA-CR-7379-01	Wound Healing (Immune C1)
TCGA-CJ-4918-01	Inflammatory (Immune C3)
TCGA-A8-A07J-01	TGF-beta Dominant (Immune C6)
TCGA-E9-A229-01	IFN-gamma Dominant (Immune C2)
TCGA-L5-A4OU-01	IFN-gamma Dominant (Immune C2)
TCGA-X9-A971-01	Lymphocyte Depleted (Immune C4)
TCGA-D6-6826-01	Wound Healing (Immune C1)
TCGA-A2-A0SX-01	IFN-gamma Dominant (Immune C2)
TCGA-CU-A0YO-01	Wound Healing (Immune C1)
TCGA-KK-A8I4-01	Inflammatory (Immune C3)
TCGA-UZ-A9PM-01	Inflammatory (Immune C3)
TCGA-B8-5545-01	Inflammatory (Immune C3)
TCGA-US-A776-01	Wound Healing (Immune C1)
TCGA-BR-8484-01	IFN-gamma Dominant (Immune C2)
TCGA-55-7724-01	IFN-gamma Dominant (Immune C2)
TCGA-F4-6703-01	Wound Healing (Immune C1)
TCGA-HU-A4G8-01	IFN-gamma Dominant (Immune C2)
TCGA-BC-A10W-01	Lymphocyte Depleted (Immune C4)
TCGA-DX-AB2Q-01	Wound Healing (Immune C1)
TCGA-44-6776-01	Inflammatory (Immune C3)
TCGA-49-4514-01	Wound Healing (Immune C1)
TCGA-05-4396-01	Inflammatory (Immune C3)
TCGA-AA-3864-01	Wound Healing (Immune C1)
TCGA-EJ-7789-01	Lymphocyte Depleted (Immune C4)
TCGA-85-A50Z-01	Wound Healing (Immune C1)
TCGA-B2-3923-01	Inflammatory (Immune C3)
TCGA-55-8204-01	Wound Healing (Immune C1)
TCGA-BP-5183-01	Inflammatory (Immune C3)
TCGA-V4-A9EA-01	Lymphocyte Depleted (Immune C4)
TCGA-QS-A5YR-01	IFN-gamma Dominant (Immune C2)
TCGA-L4-A4E6-01	Inflammatory (Immune C3)
TCGA-L5-A8NJ-01	IFN-gamma Dominant (Immune C2)
TCGA-DX-A1L0-01	TGF-beta Dominant (Immune C6)
TCGA-BH-A0AW-01	IFN-gamma Dominant (Immune C2)
TCGA-VS-A9UJ-01	Wound Healing (Immune C1)
TCGA-2G-AAF6-01	IFN-gamma Dominant (Immune C2)
TCGA-B5-A11P-01	Wound Healing (Immune C1)
TCGA-XD-AAUH-01	Inflammatory (Immune C3)
TCGA-AX-A3FW-01	IFN-gamma Dominant (Immune C2)
TCGA-BH-A2L8-01	IFN-gamma Dominant (Immune C2)
TCGA-HU-A4GC-01	IFN-gamma Dominant (Immune C2)
TCGA-EB-A5SE-01	Wound Healing (Immune C1)
TCGA-HT-A5R9-01	Lymphocyte Depleted (Immune C4)
TCGA-AA-3492-01	Wound Healing (Immune C1)
TCGA-A3-3362-01	Inflammatory (Immune C3)
TCGA-CS-5396-01	Immunologically Quiet (Immune C5)
TCGA-DX-AB32-01	IFN-gamma Dominant (Immune C2)
TCGA-BB-7866-01	IFN-gamma Dominant (Immune C2)
TCGA-HD-7832-01	IFN-gamma Dominant (Immune C2)
TCGA-Y8-A895-01	Inflammatory (Immune C3)
TCGA-A8-A08I-01	IFN-gamma Dominant (Immune C2)
TCGA-BH-A0HP-01	Wound Healing (Immune C1)
TCGA-14-0790-01	Lymphocyte Depleted (Immune C4)
TCGA-BH-A0BS-01	Lymphocyte Depleted (Immune C4)
TCGA-DJ-A4UL-01	Inflammatory (Immune C3)
TCGA-CD-A48C-01	Wound Healing (Immune C1)
TCGA-AA-3544-01	IFN-gamma Dominant (Immune C2)
TCGA-TS-A7P1-01	Wound Healing (Immune C1)
TCGA-75-6205-01	IFN-gamma Dominant (Immune C2)
TCGA-FP-8099-01	IFN-gamma Dominant (Immune C2)
TCGA-ZJ-AAXI-01	IFN-gamma Dominant (Immune C2)
TCGA-B6-A0IG-01	IFN-gamma Dominant (Immune C2)
TCGA-XN-A8T5-01	Inflammatory (Immune C3)
TCGA-ZG-A9M4-01	Inflammatory (Immune C3)
TCGA-EJ-7793-01	Inflammatory (Immune C3)
TCGA-AA-3496-01	Wound Healing (Immune C1)
TCGA-QR-A7IN-01	Inflammatory (Immune C3)
TCGA-ZF-AA4N-01	Wound Healing (Immune C1)
TCGA-XF-AAMG-01	Wound Healing (Immune C1)
TCGA-ZH-A8Y1-01	Inflammatory (Immune C3)
TCGA-DJ-A13T-01	Inflammatory (Immune C3)
TCGA-QR-A6GT-01	TGF-beta Dominant (Immune C6)
TCGA-AK-3451-01	IFN-gamma Dominant (Immune C2)
TCGA-CJ-4923-01	IFN-gamma Dominant (Immune C2)
TCGA-FV-A3R2-01	Lymphocyte Depleted (Immune C4)
TCGA-CZ-5987-01	Inflammatory (Immune C3)
TCGA-98-A538-01	Wound Healing (Immune C1)
TCGA-ET-A3BO-01	Inflammatory (Immune C3)
TCGA-KP-A3W0-01	Wound Healing (Immune C1)
TCGA-CV-6436-01	IFN-gamma Dominant (Immune C2)
TCGA-EJ-7782-01	Inflammatory (Immune C3)
TCGA-HW-8322-01	Immunologically Quiet (Immune C5)
TCGA-BP-4159-01	TGF-beta Dominant (Immune C6)
TCGA-Q1-A6DT-01	Wound Healing (Immune C1)
TCGA-85-6561-01	Wound Healing (Immune C1)
TCGA-L5-A8NN-01	IFN-gamma Dominant (Immune C2)
TCGA-ZF-A9RL-01	Lymphocyte Depleted (Immune C4)
TCGA-25-1633-01	IFN-gamma Dominant (Immune C2)
TCGA-25-2396-01	IFN-gamma Dominant (Immune C2)
TCGA-BR-7715-01	Wound Healing (Immune C1)
TCGA-BH-A0DO-01	Inflammatory (Immune C3)
TCGA-HC-A8CY-01	Lymphocyte Depleted (Immune C4)
TCGA-X6-A8C5-01	Inflammatory (Immune C3)
TCGA-DY-A0XA-01	Wound Healing (Immune C1)
TCGA-DM-A28E-01	Wound Healing (Immune C1)
TCGA-S9-A6U9-01	Immunologically Quiet (Immune C5)
TCGA-5R-AA1C-01	Lymphocyte Depleted (Immune C4)
TCGA-CK-6747-01	Wound Healing (Immune C1)
TCGA-WB-A819-01	Lymphocyte Depleted (Immune C4)
TCGA-Y8-A8S1-01	TGF-beta Dominant (Immune C6)
TCGA-G9-7523-01	Inflammatory (Immune C3)
TCGA-CJ-5680-01	Inflammatory (Immune C3)
TCGA-34-5234-01	IFN-gamma Dominant (Immune C2)
TCGA-A6-5667-01	Wound Healing (Immune C1)
TCGA-HT-7676-01	Immunologically Quiet (Immune C5)
TCGA-LN-A4A4-01	Wound Healing (Immune C1)
TCGA-XF-A9T0-01	Wound Healing (Immune C1)
TCGA-FW-A5DX-01	Lymphocyte Depleted (Immune C4)
TCGA-62-A46O-01	IFN-gamma Dominant (Immune C2)
TCGA-G3-AAV1-01	Lymphocyte Depleted (Immune C4)
TCGA-HT-7469-01	Lymphocyte Depleted (Immune C4)
TCGA-56-7822-01	Wound Healing (Immune C1)
TCGA-56-A62T-01	IFN-gamma Dominant (Immune C2)
TCGA-LL-A73Y-01	Inflammatory (Immune C3)
TCGA-BC-A10X-01	Inflammatory (Immune C3)
TCGA-EA-A3QE-01	IFN-gamma Dominant (Immune C2)
TCGA-BH-A0DK-01	IFN-gamma Dominant (Immune C2)
TCGA-GC-A4ZW-01	Wound Healing (Immune C1)
TCGA-K4-A4AC-01	IFN-gamma Dominant (Immune C2)
TCGA-85-A4JB-01	IFN-gamma Dominant (Immune C2)
TCGA-62-A472-01	IFN-gamma Dominant (Immune C2)
TCGA-NJ-A55R-01	Inflammatory (Immune C3)
TCGA-23-1026-01	IFN-gamma Dominant (Immune C2)
TCGA-VQ-A8E3-01	IFN-gamma Dominant (Immune C2)
TCGA-F5-6702-01	Wound Healing (Immune C1)
TCGA-VS-A9UQ-01	Wound Healing (Immune C1)
TCGA-BH-A0BG-01	IFN-gamma Dominant (Immune C2)
TCGA-AJ-A23N-01	Wound Healing (Immune C1)
TCGA-W5-AA34-01	Inflammatory (Immune C3)
TCGA-CA-5255-01	Wound Healing (Immune C1)
TCGA-93-A4JP-01	Lymphocyte Depleted (Immune C4)
TCGA-CK-4947-01	Wound Healing (Immune C1)
TCGA-FD-A3B3-01	IFN-gamma Dominant (Immune C2)
TCGA-IE-A6BZ-01	Inflammatory (Immune C3)
TCGA-FU-A3HY-01	Wound Healing (Immune C1)
TCGA-2G-AAGS-01	Wound Healing (Immune C1)
TCGA-V1-A8MU-01	Inflammatory (Immune C3)
TCGA-G6-A8L8-01	Inflammatory (Immune C3)
TCGA-KP-A3W1-01	IFN-gamma Dominant (Immune C2)
TCGA-CV-A6JZ-01	IFN-gamma Dominant (Immune C2)
TCGA-32-2634-01	Lymphocyte Depleted (Immune C4)
TCGA-BS-A0U7-01	Wound Healing (Immune C1)
TCGA-62-8395-01	Inflammatory (Immune C3)
TCGA-24-2261-01	IFN-gamma Dominant (Immune C2)
TCGA-AN-A0AT-01	Wound Healing (Immune C1)
TCGA-13-0800-01	IFN-gamma Dominant (Immune C2)
TCGA-3U-A98H-01	TGF-beta Dominant (Immune C6)
TCGA-77-8136-01	IFN-gamma Dominant (Immune C2)
TCGA-D1-A2G0-01	Wound Healing (Immune C1)
TCGA-ET-A40P-01	Inflammatory (Immune C3)
TCGA-CW-5589-01	Inflammatory (Immune C3)
TCGA-VQ-A8E0-01	Wound Healing (Immune C1)
TCGA-66-2756-01	Wound Healing (Immune C1)
TCGA-61-1998-01	Lymphocyte Depleted (Immune C4)
TCGA-23-1029-01	IFN-gamma Dominant (Immune C2)
TCGA-95-7567-01	IFN-gamma Dominant (Immune C2)
TCGA-E2-A14U-01	Inflammatory (Immune C3)
TCGA-AD-6888-01	Wound Healing (Immune C1)
TCGA-KB-A93G-01	Wound Healing (Immune C1)
TCGA-F4-6809-01	Wound Healing (Immune C1)
TCGA-A3-3385-01	Inflammatory (Immune C3)
TCGA-VS-A9UV-01	Wound Healing (Immune C1)
TCGA-50-5051-01	Wound Healing (Immune C1)
TCGA-BP-5000-01	Inflammatory (Immune C3)
TCGA-CN-A63U-01	IFN-gamma Dominant (Immune C2)
TCGA-AA-3502-01	Wound Healing (Immune C1)
TCGA-HT-7478-01	Lymphocyte Depleted (Immune C4)
TCGA-5P-A9K6-01	Inflammatory (Immune C3)
TCGA-VS-A8EG-01	IFN-gamma Dominant (Immune C2)
TCGA-IZ-8195-01	Inflammatory (Immune C3)
TCGA-43-8116-01	Wound Healing (Immune C1)
TCGA-MW-A4EC-01	Inflammatory (Immune C3)
TCGA-P3-A6T2-01	IFN-gamma Dominant (Immune C2)
TCGA-A3-3343-01	Inflammatory (Immune C3)
TCGA-L5-A4OM-01	Wound Healing (Immune C1)
TCGA-WB-A80Q-01	Inflammatory (Immune C3)
TCGA-BK-A13B-01	Wound Healing (Immune C1)
TCGA-EX-A69L-01	IFN-gamma Dominant (Immune C2)
TCGA-FJ-A871-01	Wound Healing (Immune C1)
TCGA-WB-A817-01	Inflammatory (Immune C3)
TCGA-55-A48Y-01	Wound Healing (Immune C1)
TCGA-BJ-A45F-01	Inflammatory (Immune C3)
TCGA-AA-3525-01	Wound Healing (Immune C1)
TCGA-AK-3447-01	Lymphocyte Depleted (Immune C4)
TCGA-Q1-A73O-01	IFN-gamma Dominant (Immune C2)
TCGA-D5-6532-01	Wound Healing (Immune C1)
TCGA-QR-A70J-01	IFN-gamma Dominant (Immune C2)
TCGA-CC-A9FU-01	Wound Healing (Immune C1)
TCGA-VS-A8QC-01	IFN-gamma Dominant (Immune C2)
TCGA-86-A456-01	IFN-gamma Dominant (Immune C2)
TCGA-33-AASB-01	Wound Healing (Immune C1)
TCGA-EA-A5ZE-01	IFN-gamma Dominant (Immune C2)
TCGA-XT-AASU-01	Wound Healing (Immune C1)
TCGA-FE-A22Z-01	Inflammatory (Immune C3)
TCGA-CV-7429-01	IFN-gamma Dominant (Immune C2)
TCGA-RW-A8AZ-01	Lymphocyte Depleted (Immune C4)
TCGA-50-5068-01	IFN-gamma Dominant (Immune C2)
TCGA-AG-A00Y-01	IFN-gamma Dominant (Immune C2)
TCGA-NJ-A55A-01	Inflammatory (Immune C3)
TCGA-ZS-A9CF-01	Lymphocyte Depleted (Immune C4)
TCGA-A4-8516-01	Lymphocyte Depleted (Immune C4)
TCGA-56-7580-01	Wound Healing (Immune C1)
TCGA-E8-A416-01	Inflammatory (Immune C3)
TCGA-S4-A8RM-01	Inflammatory (Immune C3)
TCGA-DU-A5TW-01	Immunologically Quiet (Immune C5)
TCGA-DX-AB2S-01	IFN-gamma Dominant (Immune C2)
TCGA-A5-A0R9-01	Wound Healing (Immune C1)
TCGA-IB-7890-01	Wound Healing (Immune C1)
TCGA-GD-A3OP-01	Inflammatory (Immune C3)
TCGA-90-7769-01	Wound Healing (Immune C1)
TCGA-CR-6467-01	IFN-gamma Dominant (Immune C2)
TCGA-S9-A6TX-01	Immunologically Quiet (Immune C5)
TCGA-B5-A0K8-01	IFN-gamma Dominant (Immune C2)
TCGA-IG-A97H-01	IFN-gamma Dominant (Immune C2)
TCGA-37-4135-01	IFN-gamma Dominant (Immune C2)
TCGA-RY-A83Z-01	Lymphocyte Depleted (Immune C4)
TCGA-IG-A5B8-01	IFN-gamma Dominant (Immune C2)
TCGA-JX-A5QV-01	IFN-gamma Dominant (Immune C2)
TCGA-AA-3930-01	IFN-gamma Dominant (Immune C2)
TCGA-BR-8683-01	IFN-gamma Dominant (Immune C2)
TCGA-DX-A8BQ-01	IFN-gamma Dominant (Immune C2)
TCGA-EW-A1P5-01	IFN-gamma Dominant (Immune C2)
TCGA-DJ-A13W-01	Lymphocyte Depleted (Immune C4)
TCGA-QR-A6GS-01	Inflammatory (Immune C3)
TCGA-FD-A3SL-01	Wound Healing (Immune C1)
TCGA-ET-A39L-01	Inflammatory (Immune C3)
TCGA-BH-A1FN-01	IFN-gamma Dominant (Immune C2)
TCGA-TS-A8AF-01	Wound Healing (Immune C1)
TCGA-EK-A2GZ-01	Wound Healing (Immune C1)
TCGA-N5-A4RM-01	Wound Healing (Immune C1)
TCGA-AZ-6600-01	Wound Healing (Immune C1)
TCGA-MM-A564-01	Inflammatory (Immune C3)
TCGA-E9-A3X8-01	Wound Healing (Immune C1)
TCGA-J4-A6G3-01	Inflammatory (Immune C3)
TCGA-51-4079-01	Wound Healing (Immune C1)
TCGA-DQ-7596-01	IFN-gamma Dominant (Immune C2)
TCGA-HZ-8002-01	Inflammatory (Immune C3)
TCGA-3A-A9IH-01	IFN-gamma Dominant (Immune C2)
TCGA-B5-A3FC-01	IFN-gamma Dominant (Immune C2)
TCGA-BJ-A0ZC-01	Inflammatory (Immune C3)
TCGA-98-8020-01	Wound Healing (Immune C1)
TCGA-CV-5970-01	IFN-gamma Dominant (Immune C2)
TCGA-DX-AB2G-01	TGF-beta Dominant (Immune C6)
TCGA-A7-A4SE-01	IFN-gamma Dominant (Immune C2)
TCGA-A1-A0SJ-01	Wound Healing (Immune C1)
TCGA-J2-A4AG-01	Inflammatory (Immune C3)
TCGA-EI-6510-01	Wound Healing (Immune C1)
TCGA-G4-6588-01	Wound Healing (Immune C1)
TCGA-RC-A7S9-01	Lymphocyte Depleted (Immune C4)
TCGA-22-5471-01	IFN-gamma Dominant (Immune C2)
TCGA-E2-A570-01	Wound Healing (Immune C1)
TCGA-CZ-5466-01	Inflammatory (Immune C3)
TCGA-CV-7425-01	IFN-gamma Dominant (Immune C2)
TCGA-EK-A2R9-01	IFN-gamma Dominant (Immune C2)
TCGA-QR-A6H4-01	Lymphocyte Depleted (Immune C4)
TCGA-BH-A201-01	Wound Healing (Immune C1)
TCGA-66-2744-01	IFN-gamma Dominant (Immune C2)
TCGA-61-2016-01	IFN-gamma Dominant (Immune C2)
TCGA-CN-4733-01	IFN-gamma Dominant (Immune C2)
TCGA-IR-A3LL-01	IFN-gamma Dominant (Immune C2)
TCGA-05-4405-01	Inflammatory (Immune C3)
TCGA-06-0125-01	Lymphocyte Depleted (Immune C4)
TCGA-V4-A9E5-01	Lymphocyte Depleted (Immune C4)
TCGA-DD-AA3A-01	Wound Healing (Immune C1)
TCGA-RW-A68A-01	Lymphocyte Depleted (Immune C4)
TCGA-AG-A036-01	Wound Healing (Immune C1)
TCGA-D1-A103-01	IFN-gamma Dominant (Immune C2)
TCGA-A5-A0R6-01	IFN-gamma Dominant (Immune C2)
TCGA-Y8-A8RZ-01	Lymphocyte Depleted (Immune C4)
TCGA-CR-5243-01	IFN-gamma Dominant (Immune C2)
TCGA-CZ-5469-01	Wound Healing (Immune C1)
TCGA-B6-A0RP-01	Inflammatory (Immune C3)
TCGA-D8-A27V-01	Inflammatory (Immune C3)
TCGA-ZF-AA4V-01	IFN-gamma Dominant (Immune C2)
TCGA-50-5944-01	Inflammatory (Immune C3)
TCGA-RD-A8N1-01	IFN-gamma Dominant (Immune C2)
TCGA-BR-8687-01	Wound Healing (Immune C1)
TCGA-OR-A5JV-01	Immunologically Quiet (Immune C5)
TCGA-ED-A7PY-01	Inflammatory (Immune C3)
TCGA-EM-A2CO-01	Inflammatory (Immune C3)
TCGA-BR-A4IY-01	IFN-gamma Dominant (Immune C2)
TCGA-50-6673-01	TGF-beta Dominant (Immune C6)
TCGA-V1-A9OQ-01	Inflammatory (Immune C3)
TCGA-FG-A6IZ-01	Immunologically Quiet (Immune C5)
TCGA-C5-A1M5-01	IFN-gamma Dominant (Immune C2)
TCGA-DQ-7592-01	IFN-gamma Dominant (Immune C2)
TCGA-CR-7372-01	IFN-gamma Dominant (Immune C2)
TCGA-B5-A1N2-01	IFN-gamma Dominant (Immune C2)
TCGA-YL-A9WI-01	Lymphocyte Depleted (Immune C4)
TCGA-EM-A2OZ-01	Inflammatory (Immune C3)
TCGA-55-7727-01	IFN-gamma Dominant (Immune C2)
TCGA-QR-A6H0-01	Inflammatory (Immune C3)
TCGA-CS-4941-01	Lymphocyte Depleted (Immune C4)
TCGA-A1-A0SE-01	Wound Healing (Immune C1)
TCGA-OU-A5PI-01	Lymphocyte Depleted (Immune C4)
TCGA-A4-7996-01	Inflammatory (Immune C3)
TCGA-77-8153-01	Wound Healing (Immune C1)
TCGA-MS-A51U-01	TGF-beta Dominant (Immune C6)
TCGA-L5-A88Y-01	Inflammatory (Immune C3)
TCGA-FY-A3WA-01	Inflammatory (Immune C3)
TCGA-QS-A8F1-01	Inflammatory (Immune C3)
TCGA-G3-A25S-01	Lymphocyte Depleted (Immune C4)
TCGA-ER-A19K-01	Lymphocyte Depleted (Immune C4)
TCGA-EM-A1CS-01	Inflammatory (Immune C3)
TCGA-EL-A3ZM-01	IFN-gamma Dominant (Immune C2)
TCGA-DJ-A13X-01	Inflammatory (Immune C3)
TCGA-DX-A1L3-01	Inflammatory (Immune C3)
TCGA-2Z-A9JN-01	Inflammatory (Immune C3)
TCGA-AR-A1AM-01	Wound Healing (Immune C1)
TCGA-HT-8113-01	Lymphocyte Depleted (Immune C4)
TCGA-13-0890-01	IFN-gamma Dominant (Immune C2)
TCGA-VF-A8AE-01	IFN-gamma Dominant (Immune C2)
TCGA-DH-A7UT-01	Immunologically Quiet (Immune C5)
TCGA-D1-A16F-01	Wound Healing (Immune C1)
TCGA-CK-6751-01	Wound Healing (Immune C1)
TCGA-CV-7238-01	IFN-gamma Dominant (Immune C2)
TCGA-EL-A3T7-01	Inflammatory (Immune C3)
TCGA-SN-A6IS-01	IFN-gamma Dominant (Immune C2)
TCGA-B0-5075-01	Inflammatory (Immune C3)
TCGA-DU-5851-01	Immunologically Quiet (Immune C5)
TCGA-CN-5367-01	IFN-gamma Dominant (Immune C2)
TCGA-DX-A3LS-01	TGF-beta Dominant (Immune C6)
TCGA-86-8279-01	Wound Healing (Immune C1)
TCGA-W2-A7HB-01	Immunologically Quiet (Immune C5)
TCGA-E7-A6MD-01	Wound Healing (Immune C1)
TCGA-CR-5250-01	Inflammatory (Immune C3)
TCGA-B0-5100-01	Inflammatory (Immune C3)
TCGA-EJ-7218-01	Inflammatory (Immune C3)
TCGA-XK-AAJR-01	Inflammatory (Immune C3)
TCGA-55-A494-01	Inflammatory (Immune C3)
TCGA-BP-4775-01	Inflammatory (Immune C3)
TCGA-2G-AALF-01	Wound Healing (Immune C1)
TCGA-ET-A3BT-01	Inflammatory (Immune C3)
TCGA-61-2000-01	IFN-gamma Dominant (Immune C2)
TCGA-A4-7288-01	Inflammatory (Immune C3)
TCGA-BR-4369-01	Wound Healing (Immune C1)
TCGA-B0-5400-01	Inflammatory (Immune C3)
TCGA-G4-6317-01	Wound Healing (Immune C1)
TCGA-25-2404-01	IFN-gamma Dominant (Immune C2)
TCGA-CV-7437-01	Wound Healing (Immune C1)
TCGA-55-7913-01	Wound Healing (Immune C1)
TCGA-K7-A5RG-01	IFN-gamma Dominant (Immune C2)
TCGA-QR-A707-01	Lymphocyte Depleted (Immune C4)
TCGA-EY-A1GW-01	Lymphocyte Depleted (Immune C4)
TCGA-C5-A7X8-01	Wound Healing (Immune C1)
TCGA-B0-5120-01	Inflammatory (Immune C3)
TCGA-2G-AAKM-01	Wound Healing (Immune C1)
TCGA-SG-A6Z4-01	Lymphocyte Depleted (Immune C4)
TCGA-VD-AA8R-01	Immunologically Quiet (Immune C5)
TCGA-3B-A9HZ-01	Inflammatory (Immune C3)
TCGA-CJ-4873-01	Inflammatory (Immune C3)
TCGA-SX-A7SL-01	Lymphocyte Depleted (Immune C4)
TCGA-BH-A1EX-01	TGF-beta Dominant (Immune C6)
TCGA-HW-8321-01	Immunologically Quiet (Immune C5)
TCGA-G4-6309-01	Wound Healing (Immune C1)
TCGA-KL-8340-01	Inflammatory (Immune C3)
TCGA-EZ-7264-01	Immunologically Quiet (Immune C5)
TCGA-E8-A433-01	Inflammatory (Immune C3)
TCGA-EJ-7791-01	Inflammatory (Immune C3)
TCGA-IN-A6RR-01	IFN-gamma Dominant (Immune C2)
TCGA-55-8615-01	Inflammatory (Immune C3)
TCGA-HZ-A4BK-01	TGF-beta Dominant (Immune C6)
TCGA-EL-A3GQ-01	Inflammatory (Immune C3)
TCGA-BK-A26L-01	Wound Healing (Immune C1)
TCGA-VF-A8AA-01	IFN-gamma Dominant (Immune C2)
TCGA-G2-A2EO-01	Wound Healing (Immune C1)
TCGA-D6-A6EO-01	IFN-gamma Dominant (Immune C2)
TCGA-RC-A7SF-01	Inflammatory (Immune C3)
TCGA-EB-A24C-01	Lymphocyte Depleted (Immune C4)
TCGA-F1-A448-01	Wound Healing (Immune C1)
TCGA-A7-A0CJ-01	IFN-gamma Dominant (Immune C2)
TCGA-CS-6666-01	Lymphocyte Depleted (Immune C4)
TCGA-BP-4992-01	Inflammatory (Immune C3)
TCGA-CM-5868-01	Wound Healing (Immune C1)
TCGA-WC-A885-01	Lymphocyte Depleted (Immune C4)
TCGA-BR-A4IV-01	Inflammatory (Immune C3)
TCGA-HD-A4C1-01	IFN-gamma Dominant (Immune C2)
TCGA-P4-AAVO-01	Lymphocyte Depleted (Immune C4)
TCGA-NC-A5HK-01	IFN-gamma Dominant (Immune C2)
TCGA-VQ-A91Z-01	Wound Healing (Immune C1)
TCGA-DX-A8BR-01	Lymphocyte Depleted (Immune C4)
TCGA-W5-AA2X-01	Wound Healing (Immune C1)
TCGA-DH-A66D-01	Immunologically Quiet (Immune C5)
TCGA-IR-A3LH-01	IFN-gamma Dominant (Immune C2)
TCGA-KO-8410-01	Inflammatory (Immune C3)
TCGA-D1-A16R-01	Wound Healing (Immune C1)
TCGA-LN-A4A9-01	IFN-gamma Dominant (Immune C2)
TCGA-LL-A5YO-01	IFN-gamma Dominant (Immune C2)
TCGA-86-A4JF-01	IFN-gamma Dominant (Immune C2)
TCGA-DC-6156-01	TGF-beta Dominant (Immune C6)
TCGA-QU-A6IP-01	Inflammatory (Immune C3)
TCGA-FI-A3PV-01	Wound Healing (Immune C1)
TCGA-V1-A9O9-01	Inflammatory (Immune C3)
TCGA-EO-A2CG-01	Wound Healing (Immune C1)
TCGA-AN-A0FW-01	Wound Healing (Immune C1)
TCGA-VQ-A8PH-01	Wound Healing (Immune C1)
TCGA-AC-A6IX-01	Wound Healing (Immune C1)
TCGA-A5-A0GU-01	IFN-gamma Dominant (Immune C2)
TCGA-EB-A551-01	IFN-gamma Dominant (Immune C2)
TCGA-P5-A77W-01	Immunologically Quiet (Immune C5)
TCGA-HW-7491-01	Immunologically Quiet (Immune C5)
TCGA-EY-A1GS-01	Lymphocyte Depleted (Immune C4)
TCGA-AA-A010-01	Wound Healing (Immune C1)
TCGA-A3-3320-01	Inflammatory (Immune C3)
TCGA-FT-A3EE-01	Wound Healing (Immune C1)
TCGA-AA-3837-01	Wound Healing (Immune C1)
TCGA-L9-A443-01	Inflammatory (Immune C3)
TCGA-DJ-A2PN-01	Inflammatory (Immune C3)
TCGA-G3-A7M6-01	Inflammatory (Immune C3)
TCGA-E9-A1RG-01	Wound Healing (Immune C1)
TCGA-66-2767-01	IFN-gamma Dominant (Immune C2)
TCGA-MR-A520-01	Lymphocyte Depleted (Immune C4)
TCGA-FD-A3B7-01	IFN-gamma Dominant (Immune C2)
TCGA-E1-5307-01	Immunologically Quiet (Immune C5)
TCGA-78-8660-01	IFN-gamma Dominant (Immune C2)
TCGA-C5-A1M9-01	IFN-gamma Dominant (Immune C2)
TCGA-KL-8325-01	Immunologically Quiet (Immune C5)
TCGA-HW-7495-01	Immunologically Quiet (Immune C5)
TCGA-K4-A3WU-01	Inflammatory (Immune C3)
TCGA-AG-4021-01	Wound Healing (Immune C1)
TCGA-E2-A156-01	Inflammatory (Immune C3)
TCGA-CS-6669-01	Immunologically Quiet (Immune C5)
TCGA-EL-A3GW-01	Inflammatory (Immune C3)
TCGA-EM-A2CL-01	Inflammatory (Immune C3)
TCGA-CF-A47V-01	Lymphocyte Depleted (Immune C4)
TCGA-AR-A24R-01	IFN-gamma Dominant (Immune C2)
TCGA-BS-A0TE-01	IFN-gamma Dominant (Immune C2)
TCGA-HT-7481-01	Immunologically Quiet (Immune C5)
TCGA-BG-A0MU-01	Inflammatory (Immune C3)
TCGA-NC-A5HO-01	Wound Healing (Immune C1)
TCGA-EY-A1GD-01	Wound Healing (Immune C1)
TCGA-BF-A1PZ-01	IFN-gamma Dominant (Immune C2)
TCGA-XQ-A8TA-01	Lymphocyte Depleted (Immune C4)
TCGA-78-7148-01	Wound Healing (Immune C1)
TCGA-DU-8163-01	Immunologically Quiet (Immune C5)
TCGA-D8-A1JP-01	Wound Healing (Immune C1)
TCGA-T2-A6WZ-01	IFN-gamma Dominant (Immune C2)
TCGA-AP-A0LN-01	Wound Healing (Immune C1)
TCGA-AX-A06L-01	Wound Healing (Immune C1)
TCGA-AN-A0FS-01	Wound Healing (Immune C1)
TCGA-77-8154-01	Wound Healing (Immune C1)
TCGA-2G-AAFM-01	IFN-gamma Dominant (Immune C2)
TCGA-DJ-A3V5-01	Inflammatory (Immune C3)
TCGA-AC-A3TM-01	Wound Healing (Immune C1)
TCGA-DJ-A2Q3-01	Inflammatory (Immune C3)
TCGA-D6-8568-01	IFN-gamma Dominant (Immune C2)
TCGA-CV-7446-01	IFN-gamma Dominant (Immune C2)
TCGA-A5-A0GQ-01	IFN-gamma Dominant (Immune C2)
TCGA-DJ-A2PY-01	Inflammatory (Immune C3)
TCGA-DK-A3X1-01	Wound Healing (Immune C1)
TCGA-BG-A0MQ-01	Wound Healing (Immune C1)
TCGA-B9-A5W7-01	Inflammatory (Immune C3)
TCGA-C8-A12K-01	IFN-gamma Dominant (Immune C2)
TCGA-AR-A2LE-01	Inflammatory (Immune C3)
TCGA-AD-6964-01	IFN-gamma Dominant (Immune C2)
TCGA-37-A5EL-01	Wound Healing (Immune C1)
TCGA-26-1442-01	Immunologically Quiet (Immune C5)
TCGA-B0-4688-01	Lymphocyte Depleted (Immune C4)
TCGA-AA-3848-01	Wound Healing (Immune C1)
TCGA-BH-A0HK-01	Wound Healing (Immune C1)
TCGA-CJ-4899-01	Inflammatory (Immune C3)
TCGA-G4-6295-01	Wound Healing (Immune C1)
TCGA-RD-A8NB-01	IFN-gamma Dominant (Immune C2)
TCGA-B2-4101-01	Inflammatory (Immune C3)
TCGA-BQ-7048-01	Inflammatory (Immune C3)
TCGA-DG-A2KJ-01	IFN-gamma Dominant (Immune C2)
TCGA-55-A490-01	Wound Healing (Immune C1)
TCGA-4Z-AA81-01	IFN-gamma Dominant (Immune C2)
TCGA-D1-A16E-01	IFN-gamma Dominant (Immune C2)
TCGA-CF-A3MG-01	Wound Healing (Immune C1)
TCGA-QR-A708-01	Lymphocyte Depleted (Immune C4)
TCGA-CS-4942-01	Lymphocyte Depleted (Immune C4)
TCGA-BR-A4PE-01	IFN-gamma Dominant (Immune C2)
TCGA-NH-A50T-01	Wound Healing (Immune C1)
TCGA-FE-A237-01	Inflammatory (Immune C3)
TCGA-2G-AAFI-01	IFN-gamma Dominant (Immune C2)
TCGA-ZS-A9CE-01	Lymphocyte Depleted (Immune C4)
TCGA-AR-A250-01	Wound Healing (Immune C1)
TCGA-HC-7230-01	Inflammatory (Immune C3)
TCGA-S5-AA26-01	Wound Healing (Immune C1)
TCGA-HT-8110-01	Lymphocyte Depleted (Immune C4)
TCGA-D8-A1JG-01	IFN-gamma Dominant (Immune C2)
TCGA-KL-8337-01	Immunologically Quiet (Immune C5)
TCGA-ZF-A9R4-01	Lymphocyte Depleted (Immune C4)
TCGA-E2-A152-01	Wound Healing (Immune C1)
TCGA-GN-A26C-01	IFN-gamma Dominant (Immune C2)
TCGA-AR-A24V-01	IFN-gamma Dominant (Immune C2)
TCGA-85-8070-01	Wound Healing (Immune C1)
TCGA-BS-A0TA-01	IFN-gamma Dominant (Immune C2)
TCGA-A2-A0CR-01	TGF-beta Dominant (Immune C6)
TCGA-AK-3429-01	Inflammatory (Immune C3)
TCGA-PC-A5DL-01	TGF-beta Dominant (Immune C6)
TCGA-DX-A6BB-01	Lymphocyte Depleted (Immune C4)
TCGA-S9-A6U1-01	Immunologically Quiet (Immune C5)
TCGA-YC-A9TC-01	Wound Healing (Immune C1)
TCGA-BS-A0V4-01	Inflammatory (Immune C3)
TCGA-AN-A0FX-01	Wound Healing (Immune C1)
TCGA-Z6-A9VB-01	IFN-gamma Dominant (Immune C2)
TCGA-Q1-A5R3-01	IFN-gamma Dominant (Immune C2)
TCGA-AC-A62V-01	Wound Healing (Immune C1)
TCGA-CN-6988-01	Wound Healing (Immune C1)
TCGA-ET-A39O-01	Inflammatory (Immune C3)
TCGA-AP-A0LJ-01	Inflammatory (Immune C3)
TCGA-UB-AA0U-01	Inflammatory (Immune C3)
TCGA-A6-4107-01	Wound Healing (Immune C1)
TCGA-FK-A3S3-01	Inflammatory (Immune C3)
TCGA-FB-AAQ1-01	TGF-beta Dominant (Immune C6)
TCGA-AK-3455-01	IFN-gamma Dominant (Immune C2)
TCGA-HC-7211-01	Inflammatory (Immune C3)
TCGA-2Z-A9J3-01	Inflammatory (Immune C3)
TCGA-B2-3924-01	Inflammatory (Immune C3)
TCGA-GM-A3XN-01	Wound Healing (Immune C1)
TCGA-C8-A275-01	IFN-gamma Dominant (Immune C2)
TCGA-UD-AAC7-01	Wound Healing (Immune C1)
TCGA-4L-AA1F-01	Wound Healing (Immune C1)
TCGA-AK-3433-01	Inflammatory (Immune C3)
TCGA-DD-AAD8-01	Lymphocyte Depleted (Immune C4)
TCGA-AO-A129-01	IFN-gamma Dominant (Immune C2)
TCGA-P3-A6T3-01	IFN-gamma Dominant (Immune C2)
TCGA-R5-A7ZR-01	IFN-gamma Dominant (Immune C2)
TCGA-CV-A468-01	IFN-gamma Dominant (Immune C2)
TCGA-EJ-5516-01	Inflammatory (Immune C3)
TCGA-DX-A8BV-01	Lymphocyte Depleted (Immune C4)
TCGA-AO-A12E-01	Lymphocyte Depleted (Immune C4)
TCGA-VQ-A927-01	Wound Healing (Immune C1)
TCGA-YF-AA3L-01	Wound Healing (Immune C1)
TCGA-BP-4354-01	Lymphocyte Depleted (Immune C4)
TCGA-BR-8059-01	Wound Healing (Immune C1)
TCGA-EL-A3MZ-01	Inflammatory (Immune C3)
TCGA-BS-A0V8-01	Wound Healing (Immune C1)
TCGA-BH-A1F8-01	IFN-gamma Dominant (Immune C2)
TCGA-G3-AAV3-01	Inflammatory (Immune C3)
TCGA-QK-A6V9-01	IFN-gamma Dominant (Immune C2)
TCGA-A3-3306-01	Inflammatory (Immune C3)
TCGA-CC-A8HV-01	Lymphocyte Depleted (Immune C4)
TCGA-D8-A1JK-01	IFN-gamma Dominant (Immune C2)
TCGA-HC-A8D1-01	Inflammatory (Immune C3)
TCGA-ZF-A9R0-01	Wound Healing (Immune C1)
TCGA-RY-A840-01	Immunologically Quiet (Immune C5)
TCGA-A8-A08X-01	Wound Healing (Immune C1)
TCGA-EI-6882-01	Wound Healing (Immune C1)
TCGA-BP-4975-01	Inflammatory (Immune C3)
TCGA-AZ-4315-01	IFN-gamma Dominant (Immune C2)
TCGA-DD-AADO-01	IFN-gamma Dominant (Immune C2)
TCGA-3M-AB46-01	IFN-gamma Dominant (Immune C2)
TCGA-DX-A48R-01	Lymphocyte Depleted (Immune C4)
TCGA-VM-A8C9-01	Lymphocyte Depleted (Immune C4)
TCGA-EB-A85I-01	IFN-gamma Dominant (Immune C2)
TCGA-D6-A6EK-01	IFN-gamma Dominant (Immune C2)
TCGA-CJ-4869-01	Inflammatory (Immune C3)
TCGA-AA-3506-01	Wound Healing (Immune C1)
TCGA-3A-A9I9-01	Inflammatory (Immune C3)
TCGA-A4-8098-01	Lymphocyte Depleted (Immune C4)
TCGA-BR-4255-01	Wound Healing (Immune C1)
TCGA-F2-6879-01	IFN-gamma Dominant (Immune C2)
TCGA-IN-A7NT-01	IFN-gamma Dominant (Immune C2)
TCGA-29-1784-01	IFN-gamma Dominant (Immune C2)
TCGA-SR-A6MU-01	Lymphocyte Depleted (Immune C4)
TCGA-EB-A4OZ-01	IFN-gamma Dominant (Immune C2)
TCGA-J8-A3YD-01	Inflammatory (Immune C3)
TCGA-06-0743-01	Lymphocyte Depleted (Immune C4)
TCGA-D1-A16J-01	IFN-gamma Dominant (Immune C2)
TCGA-E9-A1R6-01	Wound Healing (Immune C1)
TCGA-R5-A7ZI-01	IFN-gamma Dominant (Immune C2)
TCGA-AJ-A3NC-01	Wound Healing (Immune C1)
TCGA-QR-A70K-01	Lymphocyte Depleted (Immune C4)
TCGA-G3-A25X-01	IFN-gamma Dominant (Immune C2)
TCGA-AP-A1DV-01	Wound Healing (Immune C1)
TCGA-BP-4983-01	IFN-gamma Dominant (Immune C2)
TCGA-B4-5378-01	Lymphocyte Depleted (Immune C4)
TCGA-BR-A4J6-01	Wound Healing (Immune C1)
TCGA-DQ-7591-01	IFN-gamma Dominant (Immune C2)
TCGA-A8-A09A-01	Inflammatory (Immune C3)
TCGA-G3-A3CK-01	Lymphocyte Depleted (Immune C4)
TCGA-BR-6801-01	Wound Healing (Immune C1)
TCGA-F9-A4JJ-01	Inflammatory (Immune C3)
TCGA-IQ-A61I-01	IFN-gamma Dominant (Immune C2)
TCGA-5P-A9JZ-01	Lymphocyte Depleted (Immune C4)
TCGA-HD-A6I0-01	IFN-gamma Dominant (Immune C2)
TCGA-WC-A87W-01	Inflammatory (Immune C3)
TCGA-EM-A3AR-01	Inflammatory (Immune C3)
TCGA-A4-A5Y0-01	Lymphocyte Depleted (Immune C4)
TCGA-57-1582-01	Wound Healing (Immune C1)
TCGA-HB-A3L4-01	Wound Healing (Immune C1)
TCGA-3A-A9IB-01	Wound Healing (Immune C1)
TCGA-G7-6792-01	Inflammatory (Immune C3)
TCGA-BD-A2L6-01	Lymphocyte Depleted (Immune C4)
TCGA-B2-5639-01	Inflammatory (Immune C3)
TCGA-GK-A6C7-01	Inflammatory (Immune C3)
TCGA-EL-A4K7-01	Inflammatory (Immune C3)
TCGA-ZG-A9LY-01	Inflammatory (Immune C3)
TCGA-DJ-A1QI-01	Inflammatory (Immune C3)
TCGA-B5-A1MW-01	IFN-gamma Dominant (Immune C2)
TCGA-DJ-A2PQ-01	Inflammatory (Immune C3)
TCGA-OR-A5KO-01	Lymphocyte Depleted (Immune C4)
TCGA-A8-A08O-01	Wound Healing (Immune C1)
TCGA-EM-A22M-01	Inflammatory (Immune C3)
TCGA-AA-A01C-01	Wound Healing (Immune C1)
TCGA-V4-A9ES-01	Lymphocyte Depleted (Immune C4)
TCGA-CV-7422-01	IFN-gamma Dominant (Immune C2)
TCGA-HT-7482-01	Immunologically Quiet (Immune C5)
TCGA-CV-6962-01	Wound Healing (Immune C1)
TCGA-EA-A50E-01	IFN-gamma Dominant (Immune C2)
TCGA-21-1082-01	Wound Healing (Immune C1)
TCGA-A2-A4RY-01	Inflammatory (Immune C3)
TCGA-QH-A6CW-01	Immunologically Quiet (Immune C5)
TCGA-UF-A7JT-01	IFN-gamma Dominant (Immune C2)
TCGA-HC-7737-01	Inflammatory (Immune C3)
TCGA-AL-3466-01	Inflammatory (Immune C3)
TCGA-R5-A805-01	IFN-gamma Dominant (Immune C2)
TCGA-A2-A0SY-01	Inflammatory (Immune C3)
TCGA-D1-A0ZQ-01	Wound Healing (Immune C1)
TCGA-AC-A8OP-01	Inflammatory (Immune C3)
TCGA-98-A53J-01	Wound Healing (Immune C1)
TCGA-VP-A87B-01	Inflammatory (Immune C3)
TCGA-DU-A7T8-01	Lymphocyte Depleted (Immune C4)
TCGA-AO-A126-01	Wound Healing (Immune C1)
TCGA-EM-A4FF-01	Inflammatory (Immune C3)
TCGA-CJ-4878-01	Inflammatory (Immune C3)
TCGA-CH-5792-01	Inflammatory (Immune C3)
TCGA-DD-A11D-01	Lymphocyte Depleted (Immune C4)
TCGA-AO-A0J6-01	IFN-gamma Dominant (Immune C2)
TCGA-DU-5870-01	Immunologically Quiet (Immune C5)
TCGA-24-2033-01	Lymphocyte Depleted (Immune C4)
TCGA-D5-5539-01	Wound Healing (Immune C1)
TCGA-DD-AACK-01	Lymphocyte Depleted (Immune C4)
TCGA-D8-A27F-01	Wound Healing (Immune C1)
TCGA-AP-A1DR-01	Wound Healing (Immune C1)
TCGA-56-7579-01	Lymphocyte Depleted (Immune C4)
TCGA-EA-A556-01	IFN-gamma Dominant (Immune C2)
TCGA-MJ-A68J-01	Inflammatory (Immune C3)
TCGA-DD-A118-01	Inflammatory (Immune C3)
TCGA-VS-A9V3-01	IFN-gamma Dominant (Immune C2)
TCGA-44-6774-01	Wound Healing (Immune C1)
TCGA-KD-A5QS-01	Lymphocyte Depleted (Immune C4)
TCGA-BQ-7061-01	Inflammatory (Immune C3)
TCGA-A5-A3LP-01	Wound Healing (Immune C1)
TCGA-25-1627-01	Wound Healing (Immune C1)
TCGA-63-A5MJ-01	IFN-gamma Dominant (Immune C2)
TCGA-EW-A2FV-01	IFN-gamma Dominant (Immune C2)
TCGA-V4-A9E8-01	Inflammatory (Immune C3)
TCGA-TP-A8TV-01	Inflammatory (Immune C3)
TCGA-AY-6386-01	Wound Healing (Immune C1)
TCGA-D7-A74A-01	Wound Healing (Immune C1)
TCGA-TM-A84S-01	Immunologically Quiet (Immune C5)
TCGA-B0-4701-01	Inflammatory (Immune C3)
TCGA-33-4538-01	Wound Healing (Immune C1)
TCGA-26-5136-01	Lymphocyte Depleted (Immune C4)
TCGA-GU-A42P-01	Wound Healing (Immune C1)
TCGA-B0-4698-01	IFN-gamma Dominant (Immune C2)
TCGA-CS-4943-01	Lymphocyte Depleted (Immune C4)
TCGA-G7-6796-01	Inflammatory (Immune C3)
TCGA-AA-3855-01	Wound Healing (Immune C1)
TCGA-E9-A54X-01	Lymphocyte Depleted (Immune C4)
TCGA-AX-A2HJ-01	Wound Healing (Immune C1)
TCGA-AO-A0JB-01	Wound Healing (Immune C1)
TCGA-2F-A9KP-01	Wound Healing (Immune C1)
TCGA-A2-A1G1-01	IFN-gamma Dominant (Immune C2)
TCGA-AC-A3W5-01	Wound Healing (Immune C1)
TCGA-A6-5661-01	Wound Healing (Immune C1)
TCGA-DJ-A1QF-01	Inflammatory (Immune C3)
TCGA-N8-A4PO-01	Wound Healing (Immune C1)
TCGA-KL-8338-01	Inflammatory (Immune C3)
TCGA-LN-A4A2-01	Wound Healing (Immune C1)
TCGA-J4-A83N-01	Inflammatory (Immune C3)
TCGA-WB-A80K-01	Inflammatory (Immune C3)
TCGA-CA-5797-01	Wound Healing (Immune C1)
TCGA-B5-A11M-01	Inflammatory (Immune C3)
TCGA-A7-A13G-01	Inflammatory (Immune C3)
TCGA-AA-3514-01	Wound Healing (Immune C1)
TCGA-V4-A9EW-01	Inflammatory (Immune C3)
TCGA-2G-AALY-01	Wound Healing (Immune C1)
TCGA-14-1034-01	Lymphocyte Depleted (Immune C4)
TCGA-E2-A1IH-01	Wound Healing (Immune C1)
TCGA-BR-A4IU-01	Inflammatory (Immune C3)
TCGA-VS-A9UH-01	IFN-gamma Dominant (Immune C2)
TCGA-B0-4691-01	IFN-gamma Dominant (Immune C2)
TCGA-CN-A6V3-01	IFN-gamma Dominant (Immune C2)
TCGA-G3-AAV7-01	Lymphocyte Depleted (Immune C4)
TCGA-CU-A3QU-01	Lymphocyte Depleted (Immune C4)
TCGA-D1-A17U-01	Wound Healing (Immune C1)
TCGA-BG-A0VW-01	Wound Healing (Immune C1)
TCGA-AC-A3EH-01	Wound Healing (Immune C1)
TCGA-12-3652-01	Lymphocyte Depleted (Immune C4)
TCGA-A3-A6NN-01	Inflammatory (Immune C3)
TCGA-D8-A1Y1-01	Lymphocyte Depleted (Immune C4)
TCGA-UD-AAC1-01	Wound Healing (Immune C1)
TCGA-BR-8677-01	IFN-gamma Dominant (Immune C2)
TCGA-AO-A03V-01	Wound Healing (Immune C1)
TCGA-RY-A845-01	Immunologically Quiet (Immune C5)
TCGA-CJ-5689-01	Inflammatory (Immune C3)
TCGA-DK-AA6Q-01	IFN-gamma Dominant (Immune C2)
TCGA-DD-A4NI-01	Inflammatory (Immune C3)
TCGA-EY-A1GP-01	IFN-gamma Dominant (Immune C2)
TCGA-EJ-5515-01	Inflammatory (Immune C3)
TCGA-76-4927-01	Lymphocyte Depleted (Immune C4)
TCGA-FG-8182-01	Immunologically Quiet (Immune C5)
TCGA-UF-A7JC-01	IFN-gamma Dominant (Immune C2)
TCGA-CN-5373-01	IFN-gamma Dominant (Immune C2)
TCGA-E3-A3DZ-01	Inflammatory (Immune C3)
TCGA-26-5132-01	Lymphocyte Depleted (Immune C4)
TCGA-A3-3363-01	Lymphocyte Depleted (Immune C4)
TCGA-BH-A0DD-01	IFN-gamma Dominant (Immune C2)
TCGA-X6-A8C4-01	Lymphocyte Depleted (Immune C4)
TCGA-VS-A9UD-01	IFN-gamma Dominant (Immune C2)
TCGA-JX-A3PZ-01	Wound Healing (Immune C1)
TCGA-BP-4325-01	Inflammatory (Immune C3)
TCGA-DD-AADL-01	Lymphocyte Depleted (Immune C4)
TCGA-BT-A20P-01	Wound Healing (Immune C1)
TCGA-FB-AAPZ-01	Inflammatory (Immune C3)
TCGA-98-A53A-01	Wound Healing (Immune C1)
TCGA-EU-5905-01	Inflammatory (Immune C3)
TCGA-CZ-5985-01	Inflammatory (Immune C3)
TCGA-N9-A4Q4-01	Wound Healing (Immune C1)
TCGA-WR-A838-01	IFN-gamma Dominant (Immune C2)
TCGA-B5-A11I-01	IFN-gamma Dominant (Immune C2)
TCGA-V1-A8WV-01	Inflammatory (Immune C3)
TCGA-D7-6525-01	IFN-gamma Dominant (Immune C2)
TCGA-91-8497-01	Inflammatory (Immune C3)
TCGA-A5-A7WJ-01	IFN-gamma Dominant (Immune C2)
TCGA-ZF-A9RN-01	IFN-gamma Dominant (Immune C2)
TCGA-NC-A5HL-01	IFN-gamma Dominant (Immune C2)
TCGA-L3-A524-01	Wound Healing (Immune C1)
TCGA-C5-A1MP-01	IFN-gamma Dominant (Immune C2)
TCGA-BR-A4J1-01	Wound Healing (Immune C1)
TCGA-CC-A5UD-01	Lymphocyte Depleted (Immune C4)
TCGA-IN-A6RO-01	IFN-gamma Dominant (Immune C2)
TCGA-B7-A5TK-01	IFN-gamma Dominant (Immune C2)
TCGA-E6-A2P8-01	Wound Healing (Immune C1)
TCGA-AJ-A23O-01	IFN-gamma Dominant (Immune C2)
TCGA-X6-A7WD-01	Lymphocyte Depleted (Immune C4)
TCGA-56-8307-01	IFN-gamma Dominant (Immune C2)
TCGA-A2-A0EN-01	Inflammatory (Immune C3)
TCGA-GV-A3QI-01	Lymphocyte Depleted (Immune C4)
TCGA-W5-AA2H-01	IFN-gamma Dominant (Immune C2)
TCGA-DX-A6YX-01	Lymphocyte Depleted (Immune C4)
TCGA-3X-AAVB-01	Wound Healing (Immune C1)
TCGA-FB-AAPU-01	Wound Healing (Immune C1)
TCGA-VQ-A8PO-01	IFN-gamma Dominant (Immune C2)
TCGA-DD-AAE6-01	Lymphocyte Depleted (Immune C4)
TCGA-J1-A4AH-01	Wound Healing (Immune C1)
TCGA-GU-A42R-01	Wound Healing (Immune C1)
TCGA-B0-5081-01	Inflammatory (Immune C3)
TCGA-33-AASL-01	IFN-gamma Dominant (Immune C2)
TCGA-CW-5587-01	Inflammatory (Immune C3)
TCGA-CG-4301-01	IFN-gamma Dominant (Immune C2)
TCGA-BA-5149-01	IFN-gamma Dominant (Immune C2)
TCGA-FG-6688-01	Lymphocyte Depleted (Immune C4)
TCGA-H9-7775-01	Inflammatory (Immune C3)
TCGA-E9-A1R2-01	IFN-gamma Dominant (Immune C2)
TCGA-62-A470-01	Lymphocyte Depleted (Immune C4)
TCGA-A8-A08L-01	Wound Healing (Immune C1)
TCGA-A7-A3RF-01	Lymphocyte Depleted (Immune C4)
TCGA-53-A4EZ-01	IFN-gamma Dominant (Immune C2)
TCGA-78-7162-01	Inflammatory (Immune C3)
TCGA-IG-A51D-01	IFN-gamma Dominant (Immune C2)
TCGA-FD-A5BU-01	IFN-gamma Dominant (Immune C2)
TCGA-68-8251-01	Wound Healing (Immune C1)
TCGA-BG-A2AD-01	Wound Healing (Immune C1)
TCGA-B0-4847-01	Inflammatory (Immune C3)
TCGA-RS-A6TO-01	IFN-gamma Dominant (Immune C2)
TCGA-MQ-A4LC-01	IFN-gamma Dominant (Immune C2)
TCGA-F4-6808-01	Wound Healing (Immune C1)
TCGA-76-4932-01	Lymphocyte Depleted (Immune C4)
TCGA-A2-A0D4-01	Wound Healing (Immune C1)
TCGA-DI-A1NN-01	IFN-gamma Dominant (Immune C2)
TCGA-HT-7689-01	Immunologically Quiet (Immune C5)
TCGA-EW-A1IW-01	Wound Healing (Immune C1)
TCGA-VQ-A94P-01	Inflammatory (Immune C3)
TCGA-CV-6003-01	IFN-gamma Dominant (Immune C2)
TCGA-AG-3909-01	Wound Healing (Immune C1)
TCGA-21-1081-01	Wound Healing (Immune C1)
TCGA-AO-A03M-01	IFN-gamma Dominant (Immune C2)
TCGA-D7-6521-01	Wound Healing (Immune C1)
TCGA-58-8391-01	Wound Healing (Immune C1)
TCGA-HF-A5NB-01	IFN-gamma Dominant (Immune C2)
TCGA-B6-A0IQ-01	Wound Healing (Immune C1)
TCGA-62-8398-01	Wound Healing (Immune C1)
TCGA-BH-A1FG-01	IFN-gamma Dominant (Immune C2)
TCGA-AR-A0TS-01	IFN-gamma Dominant (Immune C2)
TCGA-66-2754-01	Wound Healing (Immune C1)
TCGA-CJ-5686-01	Inflammatory (Immune C3)
TCGA-A2-A0CM-01	IFN-gamma Dominant (Immune C2)
TCGA-FD-A3NA-01	IFN-gamma Dominant (Immune C2)
TCGA-85-A4QQ-01	Wound Healing (Immune C1)
TCGA-E2-A15I-01	Inflammatory (Immune C3)
TCGA-A8-A06X-01	IFN-gamma Dominant (Immune C2)
TCGA-KF-A41W-01	Wound Healing (Immune C1)
TCGA-FG-7638-01	Immunologically Quiet (Immune C5)
TCGA-IB-AAUN-01	Wound Healing (Immune C1)
TCGA-UD-AAC4-01	Wound Healing (Immune C1)
TCGA-KB-A93J-01	IFN-gamma Dominant (Immune C2)
TCGA-49-AAR4-01	IFN-gamma Dominant (Immune C2)
TCGA-29-1763-01	IFN-gamma Dominant (Immune C2)
TCGA-22-4601-01	Wound Healing (Immune C1)
TCGA-DU-7013-01	Lymphocyte Depleted (Immune C4)
TCGA-ET-A40Q-01	Inflammatory (Immune C3)
TCGA-EB-A3Y6-01	Wound Healing (Immune C1)
TCGA-63-A5MB-01	Wound Healing (Immune C1)
TCGA-VN-A88Q-01	Inflammatory (Immune C3)
TCGA-OR-A5JP-01	Lymphocyte Depleted (Immune C4)
TCGA-QF-A5YT-01	Wound Healing (Immune C1)
TCGA-BP-5001-01	Inflammatory (Immune C3)
TCGA-A6-5662-01	Wound Healing (Immune C1)
TCGA-G9-6348-01	Wound Healing (Immune C1)
TCGA-32-1970-01	Lymphocyte Depleted (Immune C4)
TCGA-61-2111-01	IFN-gamma Dominant (Immune C2)
TCGA-BP-4968-01	Inflammatory (Immune C3)
TCGA-DK-AA76-01	Lymphocyte Depleted (Immune C4)
TCGA-DJ-A3V4-01	Inflammatory (Immune C3)
TCGA-L5-A4OO-01	IFN-gamma Dominant (Immune C2)
TCGA-2A-A8VL-01	Inflammatory (Immune C3)
TCGA-V1-A9ZK-01	Inflammatory (Immune C3)
TCGA-43-5670-01	IFN-gamma Dominant (Immune C2)
TCGA-B0-4838-01	Inflammatory (Immune C3)
TCGA-62-A46Y-01	IFN-gamma Dominant (Immune C2)
TCGA-AA-3489-01	Wound Healing (Immune C1)
TCGA-MU-A5YI-01	IFN-gamma Dominant (Immune C2)
TCGA-BQ-5882-01	Inflammatory (Immune C3)
TCGA-66-2758-01	IFN-gamma Dominant (Immune C2)
TCGA-DK-A1AA-01	Wound Healing (Immune C1)
TCGA-DJ-A4UQ-01	Inflammatory (Immune C3)
TCGA-CH-5765-01	Inflammatory (Immune C3)
TCGA-A2-A0CZ-01	Inflammatory (Immune C3)
TCGA-B3-3926-01	Inflammatory (Immune C3)
TCGA-AF-2687-01	Wound Healing (Immune C1)
TCGA-E1-A7Z3-01	Immunologically Quiet (Immune C5)
TCGA-VS-A8QA-01	IFN-gamma Dominant (Immune C2)
TCGA-DD-AAD3-01	Inflammatory (Immune C3)
TCGA-AN-A0XS-01	Inflammatory (Immune C3)
TCGA-G9-6377-01	Wound Healing (Immune C1)
TCGA-DD-A39V-01	IFN-gamma Dominant (Immune C2)
TCGA-AG-A016-01	Wound Healing (Immune C1)
TCGA-EJ-5511-01	Inflammatory (Immune C3)
TCGA-A2-A04Q-01	IFN-gamma Dominant (Immune C2)
TCGA-WA-A7GZ-01	IFN-gamma Dominant (Immune C2)
TCGA-HT-7476-01	Lymphocyte Depleted (Immune C4)
TCGA-AZ-6599-01	Lymphocyte Depleted (Immune C4)
TCGA-BR-8381-01	IFN-gamma Dominant (Immune C2)
TCGA-K1-A3PN-01	Wound Healing (Immune C1)
TCGA-ED-A97K-01	Inflammatory (Immune C3)
TCGA-2G-AAGV-01	Wound Healing (Immune C1)
TCGA-CH-5788-01	Lymphocyte Depleted (Immune C4)
TCGA-HZ-A9TJ-01	Wound Healing (Immune C1)
TCGA-TQ-A7RG-01	Immunologically Quiet (Immune C5)
TCGA-D1-A15X-01	IFN-gamma Dominant (Immune C2)
TCGA-94-7557-01	Wound Healing (Immune C1)
TCGA-CN-5374-01	IFN-gamma Dominant (Immune C2)
TCGA-G4-6299-01	IFN-gamma Dominant (Immune C2)
TCGA-98-7454-01	IFN-gamma Dominant (Immune C2)
TCGA-DM-A1D8-01	Wound Healing (Immune C1)
TCGA-E2-A109-01	IFN-gamma Dominant (Immune C2)
TCGA-G9-6336-01	Inflammatory (Immune C3)
TCGA-V1-A8MG-01	Inflammatory (Immune C3)
TCGA-AC-A5XS-01	IFN-gamma Dominant (Immune C2)
TCGA-FD-A6TF-01	Wound Healing (Immune C1)
TCGA-AX-A064-01	Wound Healing (Immune C1)
TCGA-FG-8181-01	Immunologically Quiet (Immune C5)
TCGA-13-1410-01	IFN-gamma Dominant (Immune C2)
TCGA-B6-A1KF-01	Wound Healing (Immune C1)
TCGA-BT-A20W-01	Wound Healing (Immune C1)
TCGA-BH-A1FL-01	Inflammatory (Immune C3)
TCGA-IQ-A6SG-01	Wound Healing (Immune C1)
TCGA-B2-A4SR-01	Inflammatory (Immune C3)
TCGA-E9-A1NI-01	IFN-gamma Dominant (Immune C2)
TCGA-33-A5GW-01	Wound Healing (Immune C1)
TCGA-A5-A0R8-01	IFN-gamma Dominant (Immune C2)
TCGA-EM-A1YA-01	Inflammatory (Immune C3)
TCGA-DU-A7T6-01	Lymphocyte Depleted (Immune C4)
TCGA-YU-A90S-01	IFN-gamma Dominant (Immune C2)
TCGA-BC-A69H-01	Lymphocyte Depleted (Immune C4)
TCGA-24-1553-01	IFN-gamma Dominant (Immune C2)
TCGA-DB-A4XC-01	Immunologically Quiet (Immune C5)
TCGA-XE-AAOD-01	IFN-gamma Dominant (Immune C2)
TCGA-A8-A07R-01	IFN-gamma Dominant (Immune C2)
TCGA-62-A46R-01	IFN-gamma Dominant (Immune C2)
TCGA-CJ-4903-01	Inflammatory (Immune C3)
TCGA-EP-A2KA-01	IFN-gamma Dominant (Immune C2)
TCGA-AN-A03Y-01	Wound Healing (Immune C1)
TCGA-A2-A0T7-01	Wound Healing (Immune C1)
TCGA-B5-A3FA-01	IFN-gamma Dominant (Immune C2)
TCGA-EL-A3CL-01	Inflammatory (Immune C3)
TCGA-A2-A0CV-01	Inflammatory (Immune C3)
TCGA-63-A5MV-01	Wound Healing (Immune C1)
TCGA-DX-AB2E-01	Wound Healing (Immune C1)
TCGA-GU-A767-01	IFN-gamma Dominant (Immune C2)
TCGA-DD-AAE2-01	Inflammatory (Immune C3)
TCGA-FG-A4MW-01	Lymphocyte Depleted (Immune C4)
TCGA-BR-6456-01	IFN-gamma Dominant (Immune C2)
TCGA-CC-A5UC-01	Wound Healing (Immune C1)
TCGA-B1-A657-01	Inflammatory (Immune C3)
TCGA-BH-A1FH-01	Wound Healing (Immune C1)
TCGA-F9-A8NY-01	Inflammatory (Immune C3)
TCGA-29-1710-01	IFN-gamma Dominant (Immune C2)
TCGA-W2-A7HD-01	Lymphocyte Depleted (Immune C4)
TCGA-55-6712-01	Inflammatory (Immune C3)
TCGA-2G-AAH2-01	IFN-gamma Dominant (Immune C2)
TCGA-BP-5189-01	Inflammatory (Immune C3)
TCGA-HT-7467-01	Immunologically Quiet (Immune C5)
TCGA-CN-4731-01	IFN-gamma Dominant (Immune C2)
TCGA-D7-A6EV-01	Wound Healing (Immune C1)
TCGA-HC-7818-01	Inflammatory (Immune C3)
TCGA-L5-A8NT-01	Wound Healing (Immune C1)
TCGA-C5-A2M2-01	Lymphocyte Depleted (Immune C4)
TCGA-CJ-4881-01	Inflammatory (Immune C3)
TCGA-3X-AAVA-01	Inflammatory (Immune C3)
TCGA-QR-A70C-01	Inflammatory (Immune C3)
TCGA-IG-A3YA-01	Wound Healing (Immune C1)
TCGA-HZ-A49H-01	Inflammatory (Immune C3)
TCGA-KR-A7K8-01	Inflammatory (Immune C3)
TCGA-EJ-5497-01	Inflammatory (Immune C3)
TCGA-AN-A0XN-01	TGF-beta Dominant (Immune C6)
TCGA-A1-A0SK-01	Wound Healing (Immune C1)
TCGA-BP-4807-01	Inflammatory (Immune C3)
TCGA-AO-A125-01	Inflammatory (Immune C3)
TCGA-XF-A9T5-01	IFN-gamma Dominant (Immune C2)
TCGA-B8-A54G-01	Inflammatory (Immune C3)
TCGA-06-0219-01	Lymphocyte Depleted (Immune C4)
TCGA-PE-A5DC-01	IFN-gamma Dominant (Immune C2)
TCGA-AD-5900-01	IFN-gamma Dominant (Immune C2)
TCGA-EO-A1Y5-01	IFN-gamma Dominant (Immune C2)
TCGA-DH-5142-01	Immunologically Quiet (Immune C5)
TCGA-05-4244-01	Lymphocyte Depleted (Immune C4)
TCGA-AX-A060-01	Wound Healing (Immune C1)
TCGA-XF-A8HE-01	IFN-gamma Dominant (Immune C2)
TCGA-BH-A0AU-01	IFN-gamma Dominant (Immune C2)
TCGA-AK-3450-01	Inflammatory (Immune C3)
TCGA-14-0787-01	Lymphocyte Depleted (Immune C4)
TCGA-E3-A3E0-01	Inflammatory (Immune C3)
TCGA-AF-3400-01	Lymphocyte Depleted (Immune C4)
TCGA-BQ-5890-01	Lymphocyte Depleted (Immune C4)
TCGA-S9-A6U2-01	Immunologically Quiet (Immune C5)
TCGA-L5-A8NW-01	IFN-gamma Dominant (Immune C2)
TCGA-IA-A83T-01	Inflammatory (Immune C3)
TCGA-DX-A1KU-01	TGF-beta Dominant (Immune C6)
TCGA-GC-A3RB-01	IFN-gamma Dominant (Immune C2)
TCGA-S6-A8JW-01	IFN-gamma Dominant (Immune C2)
TCGA-CC-A7IE-01	IFN-gamma Dominant (Immune C2)
TCGA-SU-A7E7-01	Inflammatory (Immune C3)
TCGA-12-0618-01	Lymphocyte Depleted (Immune C4)
TCGA-BJ-A28X-01	Inflammatory (Immune C3)
TCGA-L9-A8F4-01	IFN-gamma Dominant (Immune C2)
TCGA-G7-6795-01	Inflammatory (Immune C3)
TCGA-H5-A2HR-01	IFN-gamma Dominant (Immune C2)
TCGA-B0-4811-01	Inflammatory (Immune C3)
TCGA-27-2524-01	Lymphocyte Depleted (Immune C4)
TCGA-GM-A2DB-01	IFN-gamma Dominant (Immune C2)
TCGA-EC-A1NJ-01	IFN-gamma Dominant (Immune C2)
TCGA-VN-A88N-01	Inflammatory (Immune C3)
TCGA-RD-A8N0-01	IFN-gamma Dominant (Immune C2)
TCGA-TQ-A7RH-01	Immunologically Quiet (Immune C5)
TCGA-L5-A4OI-01	Lymphocyte Depleted (Immune C4)
TCGA-B8-5550-01	Inflammatory (Immune C3)
TCGA-N8-A4PL-01	Wound Healing (Immune C1)
TCGA-4R-AA8I-01	Lymphocyte Depleted (Immune C4)
TCGA-VF-A8A8-01	Wound Healing (Immune C1)
TCGA-E9-A244-01	Wound Healing (Immune C1)
TCGA-CG-4442-01	Wound Healing (Immune C1)
TCGA-S7-A7X0-01	Inflammatory (Immune C3)
TCGA-DQ-7593-01	IFN-gamma Dominant (Immune C2)
TCGA-A8-A0AB-01	Wound Healing (Immune C1)
TCGA-55-7726-01	Wound Healing (Immune C1)
TCGA-2E-A9G8-01	IFN-gamma Dominant (Immune C2)
TCGA-A2-A3XV-01	Wound Healing (Immune C1)
TCGA-KV-A74V-01	Inflammatory (Immune C3)
TCGA-A6-5666-01	Wound Healing (Immune C1)
TCGA-08-0386-01	Lymphocyte Depleted (Immune C4)
TCGA-BP-5194-01	Inflammatory (Immune C3)
TCGA-CN-4735-01	IFN-gamma Dominant (Immune C2)
TCGA-91-6849-01	Inflammatory (Immune C3)
TCGA-G9-6356-01	Inflammatory (Immune C3)
TCGA-49-4512-01	TGF-beta Dominant (Immune C6)
TCGA-OR-A5JO-01	Inflammatory (Immune C3)
TCGA-FU-A5XV-01	IFN-gamma Dominant (Immune C2)
TCGA-QR-A70U-01	Lymphocyte Depleted (Immune C4)
TCGA-DB-A75M-01	Immunologically Quiet (Immune C5)
TCGA-DM-A1D7-01	Wound Healing (Immune C1)
TCGA-AN-A04A-01	Wound Healing (Immune C1)
TCGA-HT-8012-01	Immunologically Quiet (Immune C5)
TCGA-AA-A022-01	IFN-gamma Dominant (Immune C2)
TCGA-EX-A8YF-01	IFN-gamma Dominant (Immune C2)
TCGA-EM-A22P-01	Inflammatory (Immune C3)
TCGA-TS-A7OU-01	Lymphocyte Depleted (Immune C4)
TCGA-E2-A14O-01	Wound Healing (Immune C1)
TCGA-A7-A0D9-01	Wound Healing (Immune C1)
TCGA-S9-A7QW-01	Immunologically Quiet (Immune C5)
TCGA-BF-AAOX-01	Wound Healing (Immune C1)
TCGA-P5-A733-01	Immunologically Quiet (Immune C5)
TCGA-66-2770-01	Wound Healing (Immune C1)
TCGA-ED-A7PX-01	Wound Healing (Immune C1)
TCGA-2J-AABK-01	IFN-gamma Dominant (Immune C2)
TCGA-EM-A2CK-01	Inflammatory (Immune C3)
TCGA-2Z-A9JO-01	Lymphocyte Depleted (Immune C4)
TCGA-24-1567-01	Wound Healing (Immune C1)
TCGA-B8-4154-01	Inflammatory (Immune C3)
TCGA-AO-A0JJ-01	TGF-beta Dominant (Immune C6)
TCGA-AA-A02Y-01	Wound Healing (Immune C1)
TCGA-CJ-4890-01	Inflammatory (Immune C3)
TCGA-DX-A240-01	Wound Healing (Immune C1)
TCGA-MX-A666-01	Wound Healing (Immune C1)
TCGA-3A-A9J0-01	Wound Healing (Immune C1)
TCGA-34-5241-01	IFN-gamma Dominant (Immune C2)
TCGA-E1-A7Z4-01	Immunologically Quiet (Immune C5)
TCGA-DU-A5TR-01	Lymphocyte Depleted (Immune C4)
TCGA-75-6203-01	Inflammatory (Immune C3)
TCGA-77-8133-01	IFN-gamma Dominant (Immune C2)
TCGA-28-5204-01	Lymphocyte Depleted (Immune C4)
TCGA-EL-A3H1-01	Inflammatory (Immune C3)
TCGA-36-1577-01	Wound Healing (Immune C1)
TCGA-AG-3887-01	Wound Healing (Immune C1)
TCGA-ZH-A8Y4-01	Lymphocyte Depleted (Immune C4)
TCGA-43-6647-01	Wound Healing (Immune C1)
TCGA-CD-5800-01	IFN-gamma Dominant (Immune C2)
TCGA-SW-A7EA-01	IFN-gamma Dominant (Immune C2)
TCGA-GL-A9DC-01	Inflammatory (Immune C3)
TCGA-ZJ-A8QR-01	IFN-gamma Dominant (Immune C2)
TCGA-V7-A7HQ-01	Wound Healing (Immune C1)
TCGA-AN-A046-01	IFN-gamma Dominant (Immune C2)
TCGA-09-0367-01	Lymphocyte Depleted (Immune C4)
TCGA-FG-8185-01	Immunologically Quiet (Immune C5)
TCGA-BK-A4ZD-01	Lymphocyte Depleted (Immune C4)
TCGA-N5-A4R8-01	Wound Healing (Immune C1)
TCGA-VR-A8ER-01	Wound Healing (Immune C1)
TCGA-FX-A8OO-01	Wound Healing (Immune C1)
TCGA-KS-A41F-01	Inflammatory (Immune C3)
TCGA-XF-AAME-01	Wound Healing (Immune C1)
TCGA-KO-8411-01	Immunologically Quiet (Immune C5)
TCGA-OR-A5JX-01	Inflammatory (Immune C3)
TCGA-73-A9RS-01	Wound Healing (Immune C1)
TCGA-CJ-4893-01	Inflammatory (Immune C3)
TCGA-A3-3329-01	Inflammatory (Immune C3)
TCGA-HW-8320-01	Immunologically Quiet (Immune C5)
TCGA-HZ-A77P-01	Inflammatory (Immune C3)
TCGA-MP-A4TD-01	Inflammatory (Immune C3)
TCGA-EW-A3U0-01	IFN-gamma Dominant (Immune C2)
TCGA-A6-2683-01	Lymphocyte Depleted (Immune C4)
TCGA-EL-A3H5-01	Inflammatory (Immune C3)
TCGA-IA-A40Y-01	Lymphocyte Depleted (Immune C4)
TCGA-FD-A6TE-01	Wound Healing (Immune C1)
TCGA-2A-A8VV-01	Wound Healing (Immune C1)
TCGA-R6-A8W5-01	Wound Healing (Immune C1)
TCGA-UZ-A9PP-01	Inflammatory (Immune C3)
TCGA-L7-A56G-01	Wound Healing (Immune C1)
TCGA-Y8-A898-01	Lymphocyte Depleted (Immune C4)
TCGA-DF-A2KY-01	IFN-gamma Dominant (Immune C2)
TCGA-RW-A67W-01	Lymphocyte Depleted (Immune C4)
TCGA-NJ-A4YG-01	Inflammatory (Immune C3)
TCGA-AO-A0JF-01	Inflammatory (Immune C3)
TCGA-A2-A0T0-01	Wound Healing (Immune C1)
TCGA-BH-A0EA-01	Inflammatory (Immune C3)
TCGA-BT-A20O-01	IFN-gamma Dominant (Immune C2)
TCGA-CS-6667-01	Immunologically Quiet (Immune C5)
TCGA-75-5147-01	IFN-gamma Dominant (Immune C2)
TCGA-KV-A6GE-01	Inflammatory (Immune C3)
TCGA-E2-A572-01	Lymphocyte Depleted (Immune C4)
TCGA-DU-5849-01	Immunologically Quiet (Immune C5)
TCGA-56-7731-01	Wound Healing (Immune C1)
TCGA-61-1740-01	IFN-gamma Dominant (Immune C2)
TCGA-63-A5MN-01	TGF-beta Dominant (Immune C6)
TCGA-DB-5279-01	Immunologically Quiet (Immune C5)
TCGA-D8-A147-01	IFN-gamma Dominant (Immune C2)
TCGA-44-7671-01	Inflammatory (Immune C3)
TCGA-F6-A8O3-01	Immunologically Quiet (Immune C5)
TCGA-LL-A5YN-01	IFN-gamma Dominant (Immune C2)
TCGA-MI-A75C-01	Lymphocyte Depleted (Immune C4)
TCGA-AK-3458-01	IFN-gamma Dominant (Immune C2)
TCGA-NA-A4QV-01	Wound Healing (Immune C1)
TCGA-V5-A7RB-01	IFN-gamma Dominant (Immune C2)
TCGA-DQ-5630-01	IFN-gamma Dominant (Immune C2)
TCGA-06-0190-01	Lymphocyte Depleted (Immune C4)
TCGA-E2-A1LE-01	Wound Healing (Immune C1)
TCGA-38-4631-01	IFN-gamma Dominant (Immune C2)
TCGA-A3-3358-01	Inflammatory (Immune C3)
TCGA-CM-6676-01	Wound Healing (Immune C1)
TCGA-L5-A8NS-01	Wound Healing (Immune C1)
TCGA-CJ-4882-01	Inflammatory (Immune C3)
TCGA-IR-A3LB-01	IFN-gamma Dominant (Immune C2)
TCGA-F1-6177-01	IFN-gamma Dominant (Immune C2)
TCGA-EY-A4KR-01	IFN-gamma Dominant (Immune C2)
TCGA-AG-3878-01	Inflammatory (Immune C3)
TCGA-IB-AAUQ-01	IFN-gamma Dominant (Immune C2)
TCGA-HC-A9TH-01	IFN-gamma Dominant (Immune C2)
TCGA-C8-A26Y-01	Wound Healing (Immune C1)
TCGA-MZ-A7D7-01	IFN-gamma Dominant (Immune C2)
TCGA-D7-8570-01	IFN-gamma Dominant (Immune C2)
TCGA-CV-A6JT-01	IFN-gamma Dominant (Immune C2)
TCGA-B0-4833-01	Inflammatory (Immune C3)
TCGA-NC-A5HF-01	Wound Healing (Immune C1)
TCGA-G4-6626-01	Wound Healing (Immune C1)
TCGA-SR-A6MS-01	Lymphocyte Depleted (Immune C4)
[truncated: 7,128 more rows]

## Sheet: Supplementary Table S6
Supplementary Table S6: Functional annotation of the risk signature between the two subgroups.
ONTOLOGY	ID	Description	GeneRatio	BgRatio	pvalue	p.adjust	qvalue	geneID	Count				ID	Description	GeneRatio	BgRatio	pvalue	p.adjust	qvalue	geneID	Count
BP	GO:0006959	humoral immune response	23/218	380/18862	1.00593e-10	1.30515e-07	1.22208e-07	PI3/S100A7/CTSG/PRSS3/REG1A/MS4A1/C4BPA/CXCL5/CR2/PLA2G1B/DEFB1/ITLN1/C7/DMBT1/SPINK5/KRT6A/CXCL14/S100A12/IGHV1-45/CD19/CPB2/IGKV1D-12/SFTPD	23				hsa04640	Hematopoietic cell lineage	8/97	99/8112	2.18818e-05	0.0040919	0.00391569	CD1E/CD1C/IL1R2/CD22/MS4A1/CD1A/CR2/CD19	8
BP	GO:0019730	antimicrobial humoral response	15/218	142/18862	1.01529e-10	1.30515e-07	1.22208e-07	PI3/S100A7/CTSG/PRSS3/REG1A/CXCL5/PLA2G1B/DEFB1/ITLN1/DMBT1/SPINK5/KRT6A/CXCL14/S100A12/SFTPD	15				hsa05146	Amoebiasis	7/97	102/8112	0.000205629	0.0192263	0.0183984	CD1E/CD1C/IL1R2/LAMC2/CTSG/SERPINB4/CD1A	7
BP	GO:0061844	antimicrobial humoral immune response mediated by antimicrobial peptide	9/218	78/18862	2.85122e-07	0.000244349	0.000228798	S100A7/REG1A/CXCL5/PLA2G1B/DEFB1/SPINK5/KRT6A/CXCL14/S100A12	9				hsa00590	Arachidonic acid metabolism	5/97	61/8112	0.000772294	0.0481397	0.0460667	GPX2/PLA2G4F/PLA2G1B/ALOX15/CYP4F3	5
BP	GO:0006691	leukotriene metabolic process	6/218	36/18862	3.24407e-06	0.00208513	0.00195242	CYP4F11/PLA2G1B/PTGR1/ALOX15/CYP4F3/GGTLC1	6
BP	GO:0019731	antibacterial humoral response	7/218	61/18862	6.42692e-06	0.00330472	0.00309439	PI3/CTSG/PLA2G1B/DEFB1/DMBT1/SPINK5/SFTPD	7
BP	GO:0042182	ketone catabolic process	4/218	13/18862	1.14368e-05	0.00482481	0.00451774	CYP4F11/HSD17B6/KYNU/CYP4F3	4
BP	GO:0006690	icosanoid metabolic process	9/218	123/18862	1.31364e-05	0.00482481	0.00451774	CYP4F11/AKR1C2/CYP2A6/PLA2G4F/PLA2G1B/PTGR1/ALOX15/CYP4F3/GGTLC1	9
BP	GO:0002697	regulation of immune effector process	17/218	465/18862	3.05862e-05	0.00982963	0.00920402	CD1E/LBP/CD1C/CD22/SERPINB4/AGER/C4BPA/CD1A/IRF4/CR2/C7/SPINK5/STAP1/CD19/CPB2/IGKV1D-12/CD40LG	17
BP	GO:0001906	cell killing	10/218	179/18862	4.56252e-05	0.0130196	0.0121909	CD1E/CD1C/CTSG/SERPINB4/AGER/CD1A/CTSH/KRT6A/S100A12/STAP1	10
BP	GO:0001909	leukocyte mediated cytotoxicity	8/218	113/18862	5.064e-05	0.0130196	0.0121909	CD1E/CD1C/CTSG/SERPINB4/AGER/CD1A/CTSH/STAP1	8
BP	GO:0016485	protein processing	11/218	224/18862	6.19278e-05	0.0144742	0.013553	IL1R2/CTSG/PRSS3/HP/MAGEA3/KLK6/CPA3/LRRK2/MELTF/CTSH/CPB2	11
BP	GO:0031341	regulation of cell killing	7/218	98/18862	0.000142062	0.0304367	0.0284995	CD1E/CD1C/SERPINB4/AGER/CD1A/KRT6A/STAP1	7
BP	GO:0042742	defense response to bacterium	13/218	344/18862	0.00019306	0.0353144	0.0330668	PI3/LBP/S100A7/CTSG/HP/PLA2G1B/DEFB1/DMBT1/SPINK5/KRT6A/S100A12/IGHV1-45/SFTPD	13
BP	GO:0001913	T cell mediated cytotoxicity	5/218	48/18862	0.000225087	0.0353144	0.0330668	CD1E/CD1C/AGER/CD1A/CTSH	5
BP	GO:0042445	hormone metabolic process	10/218	218/18862	0.000232436	0.0353144	0.0330668	AKR1C2/CTSG/HSD17B6/KLK6/AKR1B15/TTR/CPA3/ADH1B/STC2/AKR1B10	10
BP	GO:0008228	opsonization	3/218	11/18862	0.000234629	0.0353144	0.0330668	LBP/SFTPA1/C4BPA	3
BP	GO:0010955	negative regulation of protein processing	4/218	27/18862	0.000247242	0.0353144	0.0330668	IL1R2/MAGEA3/LRRK2/CPB2	4
BP	GO:1903318	negative regulation of protein maturation	4/218	27/18862	0.000247242	0.0353144	0.0330668	IL1R2/MAGEA3/LRRK2/CPB2	4
BP	GO:0002449	lymphocyte mediated immunity	13/218	360/18862	0.000299737	0.0379743	0.0355574	CD1E/CD1C/SERPINB4/AGER/C4BPA/CD1A/CR2/C7/CTSH/IGHV1-45/CD19/IGKV1D-12/CD40LG	13
BP	GO:0001910	regulation of leukocyte mediated cytotoxicity	6/218	79/18862	0.000306372	0.0379743	0.0355574	CD1E/CD1C/SERPINB4/AGER/CD1A/STAP1	6
BP	GO:0042363	fat-soluble vitamin catabolic process	3/218	12/18862	0.000310175	0.0379743	0.0355574	CYP4F11/CYP24A1/CYP4F3	3
BP	GO:0002460	adaptive immune response based on somatic recombination of immune receptors built from immunoglobulin superfamily domains	13/218	367/18862	0.000360285	0.0421042	0.0394244	CD1E/CD1C/AGER/C4BPA/CD1A/IRF4/CR2/C7/CTSH/IGHV1-45/CD19/IGKV1D-12/CD40LG	13
BP	GO:0033559	unsaturated fatty acid metabolic process	7/218	115/18862	0.000381404	0.0426344	0.0399209	CYP4F11/AKR1C2/CYP2A6/PLA2G4F/PTGR1/ALOX15/CYP4F3	7
BP	GO:0002475	antigen processing and presentation via MHC class Ib	3/218	14/18862	0.000504505	0.0498878	0.0467126	CD1E/CD1C/CD1A	3
BP	GO:0009111	vitamin catabolic process	3/218	14/18862	0.000504505	0.0498878	0.0467126	CYP4F11/CYP24A1/CYP4F3	3
BP	GO:0050930	induction of positive chemotaxis	3/218	14/18862	0.000504505	0.0498878	0.0467126	AGER/VEGFD/ARTN	3
BP	GO:0031638	zymogen activation	5/218	58/18862	0.000548571	0.0522362	0.0489116	PRSS3/HP/MELTF/CTSH/CPB2	5
CC	GO:0042599	lamellar body	5/229	17/19520	1.17337e-06	0.00030977	0.000296431	SFTPC/SFTPA1/SPINK5/CTSH/SFTPA2	5
CC	GO:0045334	clathrin-coated endocytic vesicle	6/229	57/19520	5.37595e-05	0.00709626	0.00679068	SFTPC/SFTPA1/CD207/HLA-DQB2/SFTPA2/SFTPD	6
CC	GO:0005771	multivesicular body	6/229	62/19520	8.67374e-05	0.00763289	0.0073042	SFTPC/SFTPA1/LRRK2/CTSH/SFTPA2/SFTPD	6
CC	GO:1904724	tertiary granule lumen	5/229	55/19520	0.00045906	0.030298	0.0289933	PRSS3/HP/CTSH/CDA/CHIT1	5
MF	GO:0071723	lipopeptide binding	4/205	10/18337	3.02233e-06	0.00119684	0.00104986	CD1E/LBP/CD1C/CD1A	4
MF	GO:0004867	serine-type endopeptidase inhibitor activity	7/205	98/18337	0.000115359	0.0154382	0.0135423	PI3/SERPINB4/SERPINB5/COL7A1/SPINK13/SPINK5/SERPIND1	7
MF	GO:0019865	immunoglobulin binding	4/205	24/18337	0.000135254	0.0154382	0.0135423	CD22/MS4A2/MS4A1/FCER1A	4
MF	GO:0050786	RAGE receptor binding	3/205	10/18337	0.000155941	0.0154382	0.0135423	S100A7/S100B/S100A12	3
MF	GO:0004032	alditol:NADP+ 1-oxidoreductase activity	3/205	12/18337	0.000281205	0.019411	0.0170272	AKR1C2/AKR1B15/AKR1B10	3
MF	GO:0048306	calcium-dependent protein binding	6/205	84/18337	0.000357385	0.019411	0.0170272	S100A7/S100P/SNTN/DMBT1/S100B/S100A12	6
MF	GO:0048018	receptor ligand activity	15/205	486/18337	0.000388093	0.019411	0.0170272	BMP3/REG1A/STC1/SEMA3A/CXCL5/INHA/TTR/VEGFD/CXCL14/STC2/OGN/CD40LG/ARTN/SCGB3A1/INSL4	15
MF	GO:0016616	oxidoreductase activity, acting on the CH-OH group of donors, NAD or NADP as acceptor	7/205	120/18337	0.00040353	0.019411	0.0170272	AKR1C2/HSD17B13/HSD17B6/AKR1B15/PTGR1/ADH1B/AKR1B10	7
MF	GO:0030546	signaling receptor activator activity	15/205	492/18337	0.000441159	0.019411	0.0170272	BMP3/REG1A/STC1/SEMA3A/CXCL5/INHA/TTR/VEGFD/CXCL14/STC2/OGN/CD40LG/ARTN/SCGB3A1/INSL4	15
MF	GO:0016229	steroid dehydrogenase activity	4/205	34/18337	0.000540911	0.0205666	0.0180409	AKR1C2/HSD17B13/HSD17B6/AKR1B15	4
MF	GO:0016712	oxidoreductase activity, acting on paired donors, with incorporation or reduction of molecular oxygen, reduced flavin or flavoprotein as one donor, and incorporation of one atom of oxygen	4/205	35/18337	0.000605403	0.0205666	0.0180409	CYP4F11/CYP2A6/CYP4B1/CYP4F3	4
MF	GO:0016614	oxidoreductase activity, acting on CH-OH group of donors	7/205	130/18337	0.000652548	0.0205666	0.0180409	AKR1C2/HSD17B13/HSD17B6/AKR1B15/PTGR1/ADH1B/AKR1B10	7
MF	GO:0000217	DNA secondary structure binding	4/205	36/18337	0.000675167	0.0205666	0.0180409	NEIL3/NR0B1/HMGA2/HMGA1	4
MF	GO:0004497	monooxygenase activity	6/205	101/18337	0.000952693	0.0245682	0.0215511	CYP4F11/AKR1C2/CYP2A6/CYP24A1/CYP4B1/CYP4F3	6
MF	GO:0004866	endopeptidase inhibitor activity	8/205	180/18337	0.000964461	0.0245682	0.0215511	PI3/SERPINB4/SERPINB5/COL7A1/SPINK13/SPINK5/SERPIND1/BIRC5	8
MF	GO:0004303	estradiol 17-beta-dehydrogenase activity	3/205	18/18337	0.000992655	0.0245682	0.0215511	AKR1C2/HSD17B6/AKR1B15	3
MF	GO:0061134	peptidase regulator activity	9/205	230/18337	0.00115987	0.0270182	0.0237001	PI3/SERPINB4/SERPINB5/COL7A1/SPINK13/SPINK5/SERPIND1/CTSH/BIRC5	9
MF	GO:0030414	peptidase inhibitor activity	8/205	187/18337	0.00123233	0.0271113	0.0237818	PI3/SERPINB4/SERPINB5/COL7A1/SPINK13/SPINK5/SERPIND1/BIRC5	8
MF	GO:0008391	arachidonic acid monooxygenase activity	3/205	20/18337	0.00136416	0.0284127	0.0249234	CYP4F11/CYP2A6/CYP4F3	3
MF	GO:0061135	endopeptidase regulator activity	8/205	192/18337	0.00145764	0.0284127	0.0249234	PI3/SERPINB4/SERPINB5/COL7A1/SPINK13/SPINK5/SERPIND1/BIRC5	8
MF	GO:0005506	iron ion binding	7/205	150/18337	0.0015072	0.0284127	0.0249234	CYP4F11/CYP2A6/CYP24A1/MELTF/CYP4B1/ALOX15/CYP4F3	7
MF	GO:0008106	alcohol dehydrogenase (NADP+) activity	3/205	21/18337	0.00157848	0.0284127	0.0249234	AKR1C2/AKR1B15/AKR1B10	3
MF	GO:0070330	aromatase activity	3/205	25/18337	0.00264149	0.0454795	0.0398943	CYP4F11/CYP4B1/CYP4F3	3
MF	GO:0004252	serine-type endopeptidase activity	7/205	168/18337	0.00286145	0.0472139	0.0414157	TMPRSS11E/CTSG/PRSS3/HP/KLK6/CTSH/TPSD1	7
MF	GO:0004033	aldo-keto reductase (NADP) activity	3/205	27/18337	0.00330464	0.0523456	0.0459172	AKR1C2/AKR1B15/AKR1B10	3

## Sheet: Supplementary Table S7
Supplementary Table S7:The biological pathways in two subgroups by GSEA enrichment analysis.
Table: Gene sets enriched in phenotype h (261 samples) [plain text format]															Table: Gene sets enriched in phenotype l (229 samples) [plain text format]
	GS	GS DETAILS	SIZE	ES	NES	NOM p-val	FDR q-val	FWER p-val	RANK AT MAX	LEADING EDGE						GS	GS DETAILS	SIZE	ES	NES	NOM p-val	FDR q-val	FWER p-val	RANK AT MAX	LEADING EDGE
	follow link to MSigDB															follow link to MSigDB
1	KEGG_PYRIMIDINE_METABOLISM	Details ...	98	0.6	2.09	0	0.03	0.02	5030	tags=48%, list=9%, signal=53%					1	KEGG_INTESTINAL_IMMUNE_NETWORK_FOR_IGA_PRODUCTION	Details ...	46	-0.75	-2.07	0	0.036	0.037	6375	tags=70%, list=12%, signal=79%
2	KEGG_CELL_CYCLE	Details ...	125	0.67	2.08	0.002	0.018	0.023	5512	tags=57%, list=10%, signal=63%					2	KEGG_HEMATOPOIETIC_CELL_LINEAGE	Details ...	85	-0.63	-2.02	0.002	0.034	0.06	6328	tags=46%, list=11%, signal=52%
3	KEGG_N_GLYCAN_BIOSYNTHESIS	Details ...	46	0.6	2.06	0	0.016	0.032	6495	tags=46%, list=12%, signal=52%					3	KEGG_FC_EPSILON_RI_SIGNALING_PATHWAY	Details ...	79	-0.52	-2.01	0	0.027	0.073	8010	tags=38%, list=14%, signal=44%
4	KEGG_CITRATE_CYCLE_TCA_CYCLE	Details ...	31	0.77	2.06	0.002	0.012	0.033	11034	tags=81%, list=20%, signal=101%					4	KEGG_ASTHMA	Details ...	28	-0.79	-1.97	0	0.037	0.116	2833	tags=61%, list=5%, signal=64%
5	KEGG_PROTEASOME	Details ...	46	0.81	2.05	0	0.013	0.043	5610	tags=72%, list=10%, signal=80%					5	KEGG_B_CELL_RECEPTOR_SIGNALING_PATHWAY	Details ...	75	-0.55	-1.93	0.01	0.043	0.141	4598	tags=39%, list=8%, signal=42%
6	KEGG_HOMOLOGOUS_RECOMBINATION	Details ...	28	0.8	2.04	0.002	0.012	0.045	4723	tags=68%, list=9%, signal=74%					6	KEGG_AUTOIMMUNE_THYROID_DISEASE	Details ...	50	-0.65	-1.92	0.017	0.038	0.152	5748	tags=40%, list=10%, signal=45%
7	KEGG_PENTOSE_PHOSPHATE_PATHWAY	Details ...	27	0.69	2.04	0	0.01	0.045	9083	tags=67%, list=16%, signal=80%					7	KEGG_TYPE_I_DIABETES_MELLITUS	Details ...	41	-0.66	-1.83	0.029	0.072	0.262	2767	tags=39%, list=5%, signal=41%
8	KEGG_DNA_REPLICATION	Details ...	36	0.86	2	0.002	0.016	0.075	2309	tags=75%, list=4%, signal=78%					8	KEGG_ALLOGRAFT_REJECTION	Details ...	35	-0.74	-1.83	0.018	0.064	0.265	5748	tags=57%, list=10%, signal=64%
9	KEGG_MISMATCH_REPAIR	Details ...	23	0.82	1.98	0.002	0.017	0.093	4723	tags=74%, list=9%, signal=81%					9	KEGG_LEISHMANIA_INFECTION	Details ...	70	-0.58	-1.82	0.029	0.06	0.273	5328	tags=40%, list=10%, signal=44%
10	KEGG_GLYCOLYSIS_GLUCONEOGENESIS	Details ...	61	0.58	1.95	0	0.023	0.123	5364	tags=44%, list=10%, signal=49%					10	KEGG_T_CELL_RECEPTOR_SIGNALING_PATHWAY	Details ...	108	-0.5	-1.79	0.027	0.068	0.324	5799	tags=35%, list=10%, signal=39%
11	KEGG_BASE_EXCISION_REPAIR	Details ...	35	0.69	1.95	0	0.021	0.123	4508	tags=57%, list=8%, signal=62%					11	KEGG_CELL_ADHESION_MOLECULES_CAMS	Details ...	131	-0.51	-1.78	0.029	0.067	0.343	7402	tags=37%, list=13%, signal=42%
12	KEGG_ALZHEIMERS_DISEASE	Details ...	166	0.53	1.9	0.016	0.034	0.18	8961	tags=50%, list=16%, signal=59%					12	KEGG_GRAFT_VERSUS_HOST_DISEASE	Details ...	37	-0.7	-1.78	0.037	0.062	0.345	2767	tags=41%, list=5%, signal=43%
13	KEGG_OOCYTE_MEIOSIS	Details ...	113	0.51	1.89	0.004	0.033	0.187	4773	tags=39%, list=9%, signal=43%					13	KEGG_ALDOSTERONE_REGULATED_SODIUM_REABSORPTION	Details ...	42	-0.51	-1.75	0.004	0.068	0.383	1757	tags=24%, list=3%, signal=25%
14	KEGG_HUNTINGTONS_DISEASE	Details ...	182	0.53	1.88	0.012	0.033	0.195	8961	tags=53%, list=16%, signal=63%					14	KEGG_VIRAL_MYOCARDITIS	Details ...	68	-0.53	-1.74	0.034	0.072	0.414	3268	tags=32%, list=6%, signal=34%
15	KEGG_SPLICEOSOME	Details ...	127	0.61	1.88	0.024	0.031	0.195	7978	tags=61%, list=14%, signal=71%					15	KEGG_PRIMARY_BILE_ACID_BIOSYNTHESIS	Details ...	16	-0.58	-1.7	0.01	0.089	0.478	13081	tags=56%, list=24%, signal=74%
16	KEGG_AMINOACYL_TRNA_BIOSYNTHESIS	Details ...	41	0.65	1.88	0.008	0.029	0.199	6419	tags=56%, list=12%, signal=63%					16	KEGG_PRIMARY_IMMUNODEFICIENCY	Details ...	35	-0.67	-1.69	0.032	0.088	0.497	5799	tags=57%, list=10%, signal=64%
17	KEGG_FRUCTOSE_AND_MANNOSE_METABOLISM	Details ...	34	0.56	1.86	0	0.033	0.23	4236	tags=38%, list=8%, signal=41%					17	KEGG_ABC_TRANSPORTERS	Details ...	44	-0.47	-1.68	0.02	0.092	0.521	8873	tags=36%, list=16%, signal=43%
18	KEGG_P53_SIGNALING_PATHWAY	Details ...	68	0.5	1.86	0.008	0.031	0.23	5021	tags=41%, list=9%, signal=45%					18	KEGG_VASCULAR_SMOOTH_MUSCLE_CONTRACTION	Details ...	115	-0.42	-1.65	0.025	0.104	0.578	11874	tags=38%, list=21%, signal=49%
19	KEGG_NUCLEOTIDE_EXCISION_REPAIR	Details ...	44	0.6	1.82	0.008	0.041	0.284	5960	tags=57%, list=11%, signal=64%					19	KEGG_JAK_STAT_SIGNALING_PATHWAY	Details ...	155	-0.41	-1.65	0.04	0.102	0.583	9161	tags=33%, list=17%, signal=39%
20	KEGG_PURINE_METABOLISM	Details ...	159	0.44	1.82	0.002	0.039	0.284	5272	tags=36%, list=10%, signal=40%					20	KEGG_ANTIGEN_PROCESSING_AND_PRESENTATION	Details ...	81	-0.5	-1.63	0.059	0.108	0.613	3110	tags=25%, list=6%, signal=26%
21	KEGG_PATHOGENIC_ESCHERICHIA_COLI_INFECTION	Details ...	56	0.54	1.82	0.008	0.039	0.291	4024	tags=38%, list=7%, signal=40%					21	KEGG_CYTOKINE_CYTOKINE_RECEPTOR_INTERACTION	Details ...	264	-0.41	-1.59	0.068	0.127	0.657	9802	tags=33%, list=18%, signal=39%
22	KEGG_RNA_POLYMERASE	Details ...	29	0.61	1.79	0.024	0.047	0.349	8136	tags=55%, list=15%, signal=65%					22	KEGG_CHEMOKINE_SIGNALING_PATHWAY	Details ...	188	-0.41	-1.59	0.063	0.126	0.663	6527	tags=28%, list=12%, signal=31%
23	KEGG_GLYOXYLATE_AND_DICARBOXYLATE_METABOLISM	Details ...	16	0.68	1.78	0.008	0.049	0.367	4946	tags=50%, list=9%, signal=55%					23	KEGG_NATURAL_KILLER_CELL_MEDIATED_CYTOTOXICITY	Details ...	132	-0.43	-1.57	0.071	0.131	0.684	6615	tags=28%, list=12%, signal=32%
24	KEGG_GLUTATHIONE_METABOLISM	Details ...	49	0.56	1.76	0.02	0.054	0.395	7794	tags=47%, list=14%, signal=55%					24	KEGG_VEGF_SIGNALING_PATHWAY	Details ...	76	-0.38	-1.52	0.03	0.165	0.755	8010	tags=28%, list=14%, signal=32%
25	KEGG_PENTOSE_AND_GLUCURONATE_INTERCONVERSIONS	Details ...	28	0.62	1.75	0.006	0.057	0.411	11037	tags=57%, list=20%, signal=71%					25	KEGG_GNRH_SIGNALING_PATHWAY	Details ...	101	-0.36	-1.47	0.058	0.208	0.813	9226	tags=29%, list=17%, signal=34%
26	KEGG_PARKINSONS_DISEASE	Details ...	130	0.57	1.74	0.054	0.06	0.434	8961	tags=55%, list=16%, signal=66%					26	KEGG_LEUKOCYTE_TRANSENDOTHELIAL_MIGRATION	Details ...	116	-0.4	-1.44	0.095	0.239	0.857	7217	tags=28%, list=13%, signal=33%
27	KEGG_GALACTOSE_METABOLISM	Details ...	25	0.58	1.73	0.016	0.059	0.441	4538	tags=52%, list=8%, signal=57%					27	KEGG_PHOSPHATIDYLINOSITOL_SIGNALING_SYSTEM	Details ...	76	-0.38	-1.42	0.114	0.25	0.867	6597	tags=25%, list=12%, signal=28%
28	KEGG_BASAL_TRANSCRIPTION_FACTORS	Details ...	35	0.54	1.72	0.022	0.061	0.457	8518	tags=46%, list=15%, signal=54%					28	KEGG_TASTE_TRANSDUCTION	Details ...	51	-0.43	-1.41	0.061	0.245	0.868	19186	tags=57%, list=35%, signal=87%
29	KEGG_OXIDATIVE_PHOSPHORYLATION	Details ...	132	0.58	1.68	0.058	0.077	0.521	11309	tags=61%, list=20%, signal=77%					29	KEGG_LONG_TERM_POTENTIATION	Details ...	70	-0.35	-1.4	0.09	0.256	0.883	4636	tags=21%, list=8%, signal=23%
30	KEGG_AMINO_SUGAR_AND_NUCLEOTIDE_SUGAR_METABOLISM	Details ...	44	0.49	1.66	0.033	0.083	0.552	4538	tags=36%, list=8%, signal=40%					30	KEGG_MTOR_SIGNALING_PATHWAY	Details ...	52	-0.37	-1.38	0.105	0.267	0.898	4636	tags=23%, list=8%, signal=25%
31	KEGG_BLADDER_CANCER	Details ...	42	0.47	1.66	0.01	0.083	0.558	7030	tags=48%, list=13%, signal=55%					31	KEGG_TYPE_II_DIABETES_MELLITUS	Details ...	47	-0.37	-1.34	0.104	0.308	0.925	9226	tags=28%, list=17%, signal=33%
32	KEGG_BIOSYNTHESIS_OF_UNSATURATED_FATTY_ACIDS	Details ...	22	0.54	1.63	0.03	0.094	0.584	7194	tags=50%, list=13%, signal=57%					32	KEGG_GLYCOSPHINGOLIPID_BIOSYNTHESIS_GANGLIO_SERIES	Details ...	15	-0.49	-1.33	0.145	0.306	0.928	2487	tags=20%, list=4%, signal=21%
33	KEGG_UBIQUITIN_MEDIATED_PROTEOLYSIS	Details ...	135	0.42	1.62	0.04	0.099	0.614	5341	tags=34%, list=10%, signal=38%					33	KEGG_NON_SMALL_CELL_LUNG_CANCER	Details ...	54	-0.37	-1.32	0.135	0.313	0.933	4636	tags=22%, list=8%, signal=24%
34	KEGG_DRUG_METABOLISM_OTHER_ENZYMES	Details ...	51	0.47	1.58	0.015	0.119	0.663	11037	tags=47%, list=20%, signal=59%					34	KEGG_ALPHA_LINOLENIC_ACID_METABOLISM	Details ...	19	-0.44	-1.31	0.164	0.311	0.934	11612	tags=37%, list=21%, signal=47%
35	KEGG_VIBRIO_CHOLERAE_INFECTION	Details ...	54	0.44	1.58	0.03	0.12	0.671	8555	tags=52%, list=15%, signal=61%					35	KEGG_RENIN_ANGIOTENSIN_SYSTEM	Details ...	17	-0.47	-1.31	0.157	0.303	0.934	1303	tags=24%, list=2%, signal=24%
36	KEGG_PROGESTERONE_MEDIATED_OOCYTE_MATURATION	Details ...	85	0.42	1.57	0.049	0.119	0.674	5021	tags=33%, list=9%, signal=36%					36	KEGG_NEUROACTIVE_LIGAND_RECEPTOR_INTERACTION	Details ...	270	-0.32	-1.3	0.094	0.312	0.945	9520	tags=23%, list=17%, signal=28%
37	KEGG_TERPENOID_BACKBONE_BIOSYNTHESIS	Details ...	15	0.63	1.56	0.065	0.126	0.696	4091	tags=33%, list=7%, signal=36%					37	KEGG_MAPK_SIGNALING_PATHWAY	Details ...	267	-0.29	-1.3	0.12	0.306	0.946	9226	tags=24%, list=17%, signal=29%
38	KEGG_PYRUVATE_METABOLISM	Details ...	40	0.48	1.53	0.061	0.145	0.741	5126	tags=35%, list=9%, signal=39%					38	KEGG_NITROGEN_METABOLISM	Details ...	23	-0.4	-1.25	0.166	0.348	0.965	5550	tags=26%, list=10%, signal=29%
39	KEGG_PROTEIN_EXPORT	Details ...	24	0.55	1.53	0.116	0.143	0.743	10045	tags=50%, list=18%, signal=61%					39	KEGG_COLORECTAL_CANCER	Details ...	62	-0.34	-1.25	0.189	0.346	0.965	7348	tags=29%, list=13%, signal=33%
40	KEGG_STARCH_AND_SUCROSE_METABOLISM	Details ...	51	0.47	1.52	0.045	0.145	0.75	7768	tags=41%, list=14%, signal=48%					40	KEGG_HISTIDINE_METABOLISM	Details ...	29	-0.39	-1.25	0.204	0.342	0.966	2111	tags=17%, list=4%, signal=18%
41	KEGG_ONE_CARBON_POOL_BY_FOLATE	Details ...	17	0.57	1.51	0.077	0.145	0.757	6434	tags=59%, list=12%, signal=67%					41	KEGG_LONG_TERM_DEPRESSION	Details ...	70	-0.3	-1.24	0.153	0.341	0.968	8386	tags=27%, list=15%, signal=32%
42	KEGG_THYROID_CANCER	Details ...	29	0.46	1.51	0.056	0.144	0.765	4767	tags=38%, list=9%, signal=41%					42	KEGG_CALCIUM_SIGNALING_PATHWAY	Details ...	178	-0.28	-1.22	0.159	0.36	0.978	9226	tags=23%, list=17%, signal=28%
43	KEGG_PORPHYRIN_AND_CHLOROPHYLL_METABOLISM	Details ...	41	0.47	1.49	0.067	0.155	0.785	11037	tags=46%, list=20%, signal=58%					43	KEGG_TOLL_LIKE_RECEPTOR_SIGNALING_PATHWAY	Details ...	102	-0.33	-1.22	0.223	0.353	0.979	6431	tags=20%, list=12%, signal=22%
44	KEGG_RNA_DEGRADATION	Details ...	59	0.45	1.49	0.083	0.152	0.785	8282	tags=41%, list=15%, signal=48%					44	KEGG_PROXIMAL_TUBULE_BICARBONATE_RECLAMATION	Details ...	23	-0.39	-1.2	0.199	0.363	0.98	6237	tags=30%, list=11%, signal=34%
45	KEGG_ARGININE_AND_PROLINE_METABOLISM	Details ...	54	0.44	1.49	0.041	0.154	0.788	9741	tags=43%, list=18%, signal=52%					45	KEGG_NEUROTROPHIN_SIGNALING_PATHWAY	Details ...	126	-0.3	-1.19	0.234	0.377	0.987	5359	tags=21%, list=10%, signal=23%
46	KEGG_CYSTEINE_AND_METHIONINE_METABOLISM	Details ...	34	0.46	1.47	0.063	0.162	0.801	10085	tags=53%, list=18%, signal=65%					46	KEGG_ETHER_LIPID_METABOLISM	Details ...	33	-0.34	-1.18	0.234	0.38	0.988	8564	tags=36%, list=15%, signal=43%
47	KEGG_SMALL_CELL_LUNG_CANCER	Details ...	84	0.41	1.47	0.082	0.161	0.802	5798	tags=39%, list=10%, signal=44%					47	KEGG_COMPLEMENT_AND_COAGULATION_CASCADES	Details ...	69	-0.36	-1.17	0.254	0.379	0.991	6585	tags=25%, list=12%, signal=28%
48	KEGG_PHENYLALANINE_METABOLISM	Details ...	18	0.52	1.43	0.108	0.187	0.841	10118	tags=61%, list=18%, signal=75%					48	KEGG_LYSOSOME	Details ...	121	-0.33	-1.16	0.277	0.384	0.992	8758	tags=26%, list=16%, signal=30%
49	KEGG_NOTCH_SIGNALING_PATHWAY	Details ...	47	0.44	1.43	0.112	0.185	0.841	4356	tags=38%, list=8%, signal=42%					49	KEGG_INOSITOL_PHOSPHATE_METABOLISM	Details ...	54	-0.33	-1.15	0.302	0.389	0.993	6597	tags=24%, list=12%, signal=27%
50	KEGG_RIBOFLAVIN_METABOLISM	Details ...	16	0.48	1.41	0.089	0.198	0.864	1420	tags=25%, list=3%, signal=26%					50	KEGG_ACUTE_MYELOID_LEUKEMIA	Details ...	57	-0.33	-1.15	0.294	0.383	0.993	4636	tags=23%, list=8%, signal=25%
51	KEGG_AMYOTROPHIC_LATERAL_SCLEROSIS_ALS	Details ...	53	0.38	1.4	0.068	0.204	0.875	11233	tags=51%, list=20%, signal=64%					51	KEGG_FC_GAMMA_R_MEDIATED_PHAGOCYTOSIS	Details ...	96	-0.31	-1.14	0.27	0.382	0.993	8897	tags=29%, list=16%, signal=35%
52	KEGG_REGULATION_OF_ACTIN_CYTOSKELETON	Details ...	213	0.36	1.39	0.11	0.209	0.89	4767	tags=28%, list=9%, signal=31%					52	KEGG_ARACHIDONIC_ACID_METABOLISM	Details ...	58	-0.32	-1.14	0.275	0.385	0.994	11832	tags=29%, list=21%, signal=37%
53	KEGG_GLYCOSPHINGOLIPID_BIOSYNTHESIS_LACTO_AND_NEOLACTO_SERIES	Details ...	26	0.44	1.37	0.137	0.222	0.9	4122	tags=31%, list=7%, signal=33%					53	KEGG_LINOLEIC_ACID_METABOLISM	Details ...	29	-0.36	-1.13	0.297	0.392	0.995	13132	tags=34%, list=24%, signal=45%
54	KEGG_RENAL_CELL_CARCINOMA	Details ...	70	0.37	1.37	0.143	0.218	0.902	4924	tags=31%, list=9%, signal=34%					54	KEGG_ERBB_SIGNALING_PATHWAY	Details ...	87	-0.3	-1.12	0.293	0.389	0.995	4636	tags=17%, list=8%, signal=19%
55	KEGG_ALANINE_ASPARTATE_AND_GLUTAMATE_METABOLISM	Details ...	32	0.41	1.37	0.103	0.214	0.902	7740	tags=44%, list=14%, signal=51%					55	KEGG_PPAR_SIGNALING_PATHWAY	Details ...	69	-0.3	-1.09	0.337	0.422	0.996	6819	tags=22%, list=12%, signal=25%
56	KEGG_PATHWAYS_IN_CANCER	Details ...	325	0.33	1.37	0.129	0.213	0.904	6604	tags=31%, list=12%, signal=35%					56	KEGG_DILATED_CARDIOMYOPATHY	Details ...	90	-0.3	-1.07	0.328	0.436	0.997	5929	tags=21%, list=11%, signal=24%
57	KEGG_PANCREATIC_CANCER	Details ...	70	0.38	1.35	0.134	0.222	0.909	6545	tags=41%, list=12%, signal=47%					57	KEGG_NOD_LIKE_RECEPTOR_SIGNALING_PATHWAY	Details ...	62	-0.3	-1.07	0.351	0.436	0.997	6431	tags=19%, list=12%, signal=22%
58	KEGG_SPHINGOLIPID_METABOLISM	Details ...	39	0.39	1.33	0.127	0.24	0.92	6616	tags=33%, list=12%, signal=38%					58	KEGG_ENDOMETRIAL_CANCER	Details ...	52	-0.3	-1.06	0.368	0.447	0.997	4636	tags=17%, list=8%, signal=19%
59	KEGG_GLYCOSAMINOGLYCAN_BIOSYNTHESIS_KERATAN_SULFATE	Details ...	15	0.48	1.32	0.13	0.246	0.932	756	tags=20%, list=1%, signal=20%					59	KEGG_SNARE_INTERACTIONS_IN_VESICULAR_TRANSPORT	Details ...	38	-0.29	-1.04	0.387	0.466	0.997	10874	tags=24%, list=20%, signal=29%
60	KEGG_MELANOMA	Details ...	71	0.35	1.31	0.127	0.246	0.934	9969	tags=44%, list=18%, signal=53%					60	KEGG_BETA_ALANINE_METABOLISM	Details ...	22	-0.33	-1.01	0.439	0.497	0.999	2989	tags=23%, list=5%, signal=24%
61	KEGG_ADHERENS_JUNCTION	Details ...	73	0.38	1.29	0.212	0.267	0.945	6479	tags=37%, list=12%, signal=42%					61	KEGG_HYPERTROPHIC_CARDIOMYOPATHY_HCM	Details ...	83	-0.28	-1.01	0.438	0.494	0.999	4867	tags=18%, list=9%, signal=20%
62	KEGG_CHRONIC_MYELOID_LEUKEMIA	Details ...	73	0.36	1.29	0.183	0.263	0.945	5798	tags=36%, list=10%, signal=40%					62	KEGG_APOPTOSIS	Details ...	87	-0.26	-0.99	0.46	0.51	1	6146	tags=20%, list=11%, signal=22%
63	KEGG_NICOTINATE_AND_NICOTINAMIDE_METABOLISM	Details ...	24	0.4	1.29	0.141	0.261	0.945	4443	tags=25%, list=8%, signal=27%					63	KEGG_SYSTEMIC_LUPUS_ERYTHEMATOSUS	Details ...	135	-0.37	-0.99	0.511	0.506	1	6970	tags=20%, list=13%, signal=23%
64	KEGG_STEROID_BIOSYNTHESIS	Details ...	17	0.49	1.28	0.202	0.26	0.946	6503	tags=35%, list=12%, signal=40%					64	KEGG_PEROXISOME	Details ...	78	-0.28	-0.98	0.468	0.506	1	8819	tags=21%, list=16%, signal=24%
65	KEGG_GLYCOSYLPHOSPHATIDYLINOSITOL_GPI_ANCHOR_BIOSYNTHESIS	Details ...	25	0.41	1.27	0.212	0.274	0.957	6898	tags=36%, list=12%, signal=41%					65	KEGG_HEDGEHOG_SIGNALING_PATHWAY	Details ...	56	-0.27	-0.97	0.478	0.516	1	8290	tags=18%, list=15%, signal=21%
66	KEGG_GAP_JUNCTION	Details ...	90	0.34	1.26	0.176	0.272	0.957	6479	tags=28%, list=12%, signal=31%					66	KEGG_OLFACTORY_TRANSDUCTION	Details ...	386	-0.23	-0.96	0.553	0.524	1	26646	tags=44%, list=48%, signal=84%
67	KEGG_ENDOCYTOSIS	Details ...	181	0.32	1.25	0.202	0.278	0.961	6236	tags=29%, list=11%, signal=33%					67	KEGG_TGF_BETA_SIGNALING_PATHWAY	Details ...	86	-0.25	-0.95	0.539	0.529	1	9173	tags=21%, list=17%, signal=25%
68	KEGG_LYSINE_DEGRADATION	Details ...	44	0.39	1.25	0.186	0.28	0.965	9751	tags=50%, list=18%, signal=61%					68	KEGG_FATTY_ACID_METABOLISM	Details ...	42	-0.3	-0.95	0.505	0.526	1	3923	tags=17%, list=7%, signal=18%
69	KEGG_EPITHELIAL_CELL_SIGNALING_IN_HELICOBACTER_PYLORI_INFECTION	Details ...	68	0.33	1.23	0.198	0.291	0.969	6972	tags=37%, list=13%, signal=42%					69	KEGG_RIG_I_LIKE_RECEPTOR_SIGNALING_PATHWAY	Details ...	71	-0.23	-0.87	0.596	0.622	1	3045	tags=10%, list=6%, signal=10%
70	KEGG_O_GLYCAN_BIOSYNTHESIS	Details ...	30	0.38	1.19	0.24	0.333	0.981	3252	tags=23%, list=6%, signal=25%					70	KEGG_CYTOSOLIC_DNA_SENSING_PATHWAY	Details ...	55	-0.24	-0.86	0.628	0.627	1	5317	tags=11%, list=10%, signal=12%
71	KEGG_AXON_GUIDANCE	Details ...	129	0.31	1.19	0.226	0.329	0.981	4296	tags=25%, list=8%, signal=27%					71	KEGG_BASAL_CELL_CARCINOMA	Details ...	55	-0.24	-0.84	0.667	0.652	1	5213	tags=13%, list=9%, signal=14%
72	KEGG_FOCAL_ADHESION	Details ...	199	0.33	1.17	0.29	0.352	0.986	5233	tags=29%, list=9%, signal=32%					72	KEGG_MELANOGENESIS	Details ...	101	-0.2	-0.8	0.799	0.702	1	9161	tags=17%, list=17%, signal=20%
73	KEGG_STEROID_HORMONE_BIOSYNTHESIS	Details ...	55	0.36	1.16	0.264	0.354	0.986	11382	tags=42%, list=21%, signal=53%					73	KEGG_OTHER_GLYCAN_DEGRADATION	Details ...	16	-0.3	-0.8	0.693	0.701	1	2631	tags=19%, list=5%, signal=20%
74	KEGG_CARDIAC_MUSCLE_CONTRACTION	Details ...	79	0.33	1.16	0.245	0.352	0.987	8961	tags=39%, list=16%, signal=47%					74	KEGG_VALINE_LEUCINE_AND_ISOLEUCINE_DEGRADATION	Details ...	44	-0.25	-0.74	0.74	0.779	1	7626	tags=23%, list=14%, signal=26%
75	KEGG_PRION_DISEASES	Details ...	35	0.36	1.15	0.259	0.355	0.988	4589	tags=29%, list=8%, signal=31%
76	KEGG_GLYCOSAMINOGLYCAN_BIOSYNTHESIS_CHONDROITIN_SULFATE	Details ...	22	0.41	1.14	0.316	0.362	0.988	6426	tags=36%, list=12%, signal=41%
77	KEGG_ECM_RECEPTOR_INTERACTION	Details ...	84	0.37	1.14	0.34	0.358	0.988	5520	tags=35%, list=10%, signal=38%
78	KEGG_ARRHYTHMOGENIC_RIGHT_VENTRICULAR_CARDIOMYOPATHY_ARVC	Details ...	74	0.33	1.13	0.3	0.377	0.991	4877	tags=27%, list=9%, signal=30%
79	KEGG_ASCORBATE_AND_ALDARATE_METABOLISM	Details ...	25	0.41	1.12	0.325	0.377	0.991	11037	tags=48%, list=20%, signal=60%
80	KEGG_PROSTATE_CANCER	Details ...	89	0.29	1.11	0.287	0.385	0.994	7030	tags=31%, list=13%, signal=36%
81	KEGG_SELENOAMINO_ACID_METABOLISM	Details ...	26	0.35	1.11	0.334	0.384	0.995	5743	tags=35%, list=10%, signal=39%
82	KEGG_GLIOMA	Details ...	65	0.31	1.11	0.326	0.38	0.995	9287	tags=43%, list=17%, signal=52%
83	KEGG_TYROSINE_METABOLISM	Details ...	42	0.32	1.1	0.316	0.381	0.995	10980	tags=45%, list=20%, signal=56%
84	KEGG_GLYCEROLIPID_METABOLISM	Details ...	49	0.3	1.1	0.308	0.38	0.995	6508	tags=29%, list=12%, signal=32%
85	KEGG_METABOLISM_OF_XENOBIOTICS_BY_CYTOCHROME_P450	Details ...	69	0.34	1.09	0.354	0.391	0.998	11037	tags=42%, list=20%, signal=52%
86	KEGG_WNT_SIGNALING_PATHWAY	Details ...	151	0.26	1.08	0.326	0.392	0.998	6478	tags=25%, list=12%, signal=28%
87	KEGG_DORSO_VENTRAL_AXIS_FORMATION	Details ...	24	0.35	1.06	0.385	0.414	0.998	7486	tags=25%, list=14%, signal=29%
88	KEGG_PANTOTHENATE_AND_COA_BIOSYNTHESIS	Details ...	16	0.35	1.05	0.375	0.424	0.999	9009	tags=38%, list=16%, signal=45%
89	KEGG_INSULIN_SIGNALING_PATHWAY	Details ...	136	0.24	1.01	0.427	0.475	1	6636	tags=25%, list=12%, signal=28%
90	KEGG_RETINOL_METABOLISM	Details ...	64	0.3	1	0.451	0.477	1	15248	tags=53%, list=28%, signal=73%
91	KEGG_GLYCEROPHOSPHOLIPID_METABOLISM	Details ...	76	0.24	0.95	0.526	0.55	1	6508	tags=25%, list=12%, signal=28%
92	KEGG_VASOPRESSIN_REGULATED_WATER_REABSORPTION	Details ...	44	0.27	0.95	0.499	0.545	1	5782	tags=27%, list=10%, signal=30%
93	KEGG_BUTANOATE_METABOLISM	Details ...	34	0.31	0.94	0.518	0.541	1	8002	tags=44%, list=14%, signal=52%
94	KEGG_ADIPOCYTOKINE_SIGNALING_PATHWAY	Details ...	66	0.26	0.94	0.52	0.545	1	10018	tags=35%, list=18%, signal=43%
95	KEGG_TIGHT_JUNCTION	Details ...	131	0.23	0.9	0.592	0.598	1	8555	tags=31%, list=15%, signal=37%
96	KEGG_GLYCINE_SERINE_AND_THREONINE_METABOLISM	Details ...	31	0.29	0.88	0.629	0.623	1	10085	tags=39%, list=18%, signal=47%
97	KEGG_MATURITY_ONSET_DIABETES_OF_THE_YOUNG	Details ...	25	0.3	0.84	0.668	0.675	1	12730	tags=48%, list=23%, signal=62%
98	KEGG_PROPANOATE_METABOLISM	Details ...	33	0.28	0.83	0.625	0.679	1	3907	tags=24%, list=7%, signal=26%
99	KEGG_GLYCOSAMINOGLYCAN_BIOSYNTHESIS_HEPARAN_SULFATE	Details ...	26	0.24	0.73	0.823	0.824	1	12917	tags=46%, list=23%, signal=60%
100	KEGG_DRUG_METABOLISM_CYTOCHROME_P450	Details ...	71	0.22	0.71	0.823	0.835	1	11037	tags=35%, list=20%, signal=44%
101	KEGG_RIBOSOME		88	0.32	0.68	0.71	0.862	1	12359	tags=40%, list=22%, signal=51%
102	KEGG_TRYPTOPHAN_METABOLISM		40	0.21	0.68	0.879	0.855	1	3907	tags=15%, list=7%, signal=16%
103	KEGG_REGULATION_OF_AUTOPHAGY		35	0.16	0.58	0.975	0.944	1	46231	tags=100%, list=84%, signal=608%
104	KEGG_GLYCOSAMINOGLYCAN_DEGRADATION		21	0.14	0.41	1	0.994	1	12841	tags=38%, list=23%, signal=50%

## Sheet: Supplementary Table S8
Supplementary Table S8: The PCR primer sequences
Name	Orgnisim	F 5'-3'	R 5'-3'	SIZE/BP	ta/
AL033397.2	Homo sapiens	TTGGGACCCGATGGCAAGACTG	ACCAACATGGGGAGGCAGTTTTC	71	55-60
LINC00707	Homo sapiens	CTACTTTTGAGGTTTTGGGACTTTAC	GATGTGCAGGAGGTGTTAGGAC	155	55-60
LINC00941	Homo sapiens	TCCAACTACCAGACATTGACCATTC	CGGTTTGTATTGTCAGTATGCCTATG	174	55-60
AL132656.2	Homo sapiens	ATGGTTCTATCTGGCTTGGTGACGA	CCAGGGGATTGTTGATAAACTCAG	236	55-60
AC021016.1	Homo sapiens	GCGTAGCCAAATTCCACCGAC	ACCGCACCCCCAGTAATCAC	112	55-60
AC123595.1	Homo sapiens	CGTTGTACCCAGCTCTCGTC	CCAAGGTTAGTTATCAAGCGTAGTG	80	55-60
LINC02390	Homo sapiens	CAACCAGTTCTCTTCACCACTTC	GGTCAAAGCCGTCCCAATG	74	55-60
AC068228.1	Homo sapiens	GATGGACTGCCTAGAACCCTGAC	GACCAACCACTTGTACTGAAATCCTA	88	55-60
